# Supplementary material for: Influence of environmental factors on early-life gut microbial trajectories and maturation
Source: Research Square preprint supplement (doi:10.21203/rs.3.rs-8025481/v1), 2025-12-23
Supplement: Supplementary file 2 [file a1483387930dc28dac4f5ef0.xlsx]

## Sheet: COPSAC
Trajectory	Domain	Phylum	Class	Order	Family	Genus	Species	TaxaID
4	Archaea	Methanobacteriota	Methanobacteria	Methanobacteriales	Methanobacteriaceae	Methanobrevibacter_A	Methanobrevibacter_A smithii/smithii_A	c592ca4580eeda792e1d89b8ae682fb5
1	Bacteria	Verrucomicrobiota	Lentisphaeria	Victivallales	Victivallaceae	Victivallis	Victivallis sp002998355	445e7db900b2da8cd3545bd36e512f51
1	Bacteria	Fusobacteriota	Fusobacteriia	Fusobacteriales	Fusobacteriaceae	Fusobacterium_C	Fusobacterium_C necrophorum	720d81ba9abe82337772bb7966d54e0e
1	Bacteria	Fusobacteriota	Fusobacteriia	Fusobacteriales	Fusobacteriaceae	Cetobacterium	Cetobacterium sp.	dd0a09385f2dec8f4307fbe1528de4dc
1	Bacteria	Fusobacteriota	Fusobacteriia	Fusobacteriales	Fusobacteriaceae	Fusobacterium_A	Fusobacterium_A sp900549465	b94203254f7509fcbfb4d654adc66227
1	Bacteria	Fusobacteriota	Fusobacteriia	Fusobacteriales	Fusobacteriaceae	Fusobacterium_A	Fusobacterium_A mortiferum/necrogenes	61741589009587b8e1df835b90893cef
1	Bacteria	Fusobacteriota	Fusobacteriia	Fusobacteriales	Fusobacteriaceae	Fusobacterium_A	Fusobacterium_A sp.	79fc7265f2cff57f03e7b95035a75d07
2	Bacteria	Fusobacteriota	Fusobacteriia	Fusobacteriales	Fusobacteriaceae	Fusobacterium_A	Fusobacterium_A sp.2	42a23e6f4764f572f4d7c6d8e08769c3
1	Bacteria	Fusobacteriota	Fusobacteriia	Fusobacteriales	Fusobacteriaceae	Fusobacterium	Fusobacterium periodonticum/periodonticum_B/periodonticum_D/pseudoperiodonticum	2ea17744c7eeab459b7f41d4f9e22894
1	Bacteria	Fusobacteriota	Fusobacteriia	Fusobacteriales	Fusobacteriaceae	Fusobacterium	Fusobacterium sp.	f79d33f8b4c00455bf9767bd1d715280
2	Bacteria	Fusobacteriota	Fusobacteriia	Fusobacteriales	Fusobacteriaceae	Fusobacterium	Fusobacterium animalis	a805200f08abbfa1a4679a264e851398
1	Bacteria	Fusobacteriota	Fusobacteriia	Fusobacteriales	Fusobacteriaceae	Fusobacterium	Fusobacterium canifelinum/polymorphum	095f00e04148b0db5e970c32232272f1
1	Bacteria	Fusobacteriota	Fusobacteriia	Fusobacteriales	Fusobacteriaceae	Fusobacterium	Fusobacterium sp.2	bb243e746b385279c86c7c8b365601d3
1	Bacteria	Deinococcota	Deinococci	Deinococcales	Deinococcaceae	Deinococcus	Deinococcus radiodurans	e5199a623272b9b25c65f0455a1cd77b
1	Bacteria	Cyanobacteria	Vampirovibrionia	Gastranaerophilales	Gastranaerophilaceae	Zag111	Zag111 sp003258735	74606d16864c5dc3d17e64a95da7f0ab
1	Bacteria	Bacteroidota	Bacteroidia	Bacteroidales	Bacteroidaceae	Prevotella	Prevotella sp002102825/sp900767615	436fcf293d243f6f00d7250638e16dfd
1	Bacteria	Cyanobacteria	Vampirovibrionia	Gastranaerophilales	Gastranaerophilaceae	Zag1	Zag1 sp001765415	f7dca733392e0c8293aea21cb435ea24
1	Bacteria	Cyanobacteria	Vampirovibrionia	Gastranaerophilales	Gastranaerophilaceae	CAG-196	CAG-196 sp000980375/sp002102975	4c304a27bc0520a7c398410713645502
1	Bacteria	Actinobacteriota	Actinomycetia	Actinomycetales	Bifidobacteriaceae	Bifidobacterium	Bifidobacterium sp.	8477552621c96fc161abfc979824d423
1	Bacteria	Firmicutes_A	Clostridia	Oscillospirales	Oscillospiraceae	CAG-110	CAG-110 sp.	fefd182b01f5fd2e5cbc6d5db9b5580d
1	Bacteria	Actinobacteriota	Actinomycetia	Actinomycetales	Bifidobacteriaceae	Bifidobacterium	Bifidobacterium breve/infantis/kashiwanohense_A/longum/scaligerum/sp012932375	6ec6d03fbef9f16e3581ccdc60e7d266
1	Bacteria	Actinobacteriota	Actinomycetia	Actinomycetales	Bifidobacteriaceae	Bifidobacterium	Bifidobacterium sp.2	8a8eb23489b208b494f7efd701586496
1	Bacteria	Actinobacteriota	Actinomycetia	Actinomycetales	Bifidobacteriaceae	Bifidobacterium	Bifidobacterium sp.3	74b648ec7c3e623fc99af5cc74519e2c
1	Bacteria	Actinobacteriota	Actinomycetia	Actinomycetales	Bifidobacteriaceae	Bifidobacterium	Bifidobacterium sp.4	a74507f6f95aa8b6dc2658dba822ab9c
1	Bacteria	Actinobacteriota	Actinomycetia	Actinomycetales	Bifidobacteriaceae	Bifidobacterium	Bifidobacterium sp.5	239a0c11b5991b8db3d1ca202eba0d18
1	Bacteria	Actinobacteriota	Actinomycetia	Actinomycetales	Bifidobacteriaceae	Bifidobacterium	Bifidobacterium sp.6	78b5b0321d2dd4dff42053939e6d6642
1	Bacteria	Firmicutes_A	Clostridia	Oscillospirales	Oscillospiraceae	CAG-110	CAG-110 sp.2	327333264d2d3fd218350b8201a128fa
1	Bacteria	Actinobacteriota	Actinomycetia	Actinomycetales	Bifidobacteriaceae	Bifidobacterium	Bifidobacterium sp.7	8534c358254b1ce9593b641dfc2cb314
1	Bacteria	Actinobacteriota	Actinomycetia	Actinomycetales	Bifidobacteriaceae	Bifidobacterium	Bifidobacterium anseris/castoris/choerinum/criceti/globosum/italicum/pseudolongum/pseudolongum_C	f15862cf183a0d5d4cf4de92e881a148
4	Bacteria	Firmicutes_A	Clostridia	Oscillospirales	Oscillospiraceae	CAG-110	CAG-110 sp900752285/sp900760325	f57371caf7ca93e1ba2b72d22e3fd0ba
1	Bacteria	Actinobacteriota	Actinomycetia	Actinomycetales	Bifidobacteriaceae	Bifidobacterium	Bifidobacterium sp.8	bb07b691067efb6283aede0dca6eb2d6
1	Bacteria	Actinobacteriota	Actinomycetia	Actinomycetales	Bifidobacteriaceae	Bifidobacterium	Bifidobacterium sp.9	69a55d967a3ed1f68b1833eb62d82fbd
1	Bacteria	Actinobacteriota	Actinomycetia	Actinomycetales	Bifidobacteriaceae	Bifidobacterium	Bifidobacterium bifidum	55d978414b76a8a1485be2e42c6703a8
1	Bacteria	Actinobacteriota	Actinomycetia	Actinomycetales	Bifidobacteriaceae	Bifidobacterium	Bifidobacterium sp.10	53c3c610ed649572075514678b27196c
1	Bacteria	Actinobacteriota	Actinomycetia	Actinomycetales	Bifidobacteriaceae	Bifidobacterium	Bifidobacterium sp.11	d682e1f484cf8d214cc24b5dd2413d8d
1	Bacteria	Actinobacteriota	Actinomycetia	Actinomycetales	Bifidobacteriaceae	Bifidobacterium	Bifidobacterium sp.12	93b68964fae461620df7e27250fe4480
4	Bacteria	Actinobacteriota	Actinomycetia	Actinomycetales	Bifidobacteriaceae	Bifidobacterium	Bifidobacterium angulatum/merycicum/sp012932675	80f67e8059fe8b79d1a0034e79f0e01d
1	Bacteria	Actinobacteriota	Actinomycetia	Actinomycetales	Bifidobacteriaceae	Bifidobacterium	Bifidobacterium pullorum/scardovii/sp010667645	ed9cabe8c9d685b7734214d8beedee77
1	Bacteria	Actinobacteriota	Actinomycetia	Actinomycetales	Bifidobacteriaceae	Bifidobacterium	Bifidobacterium sp.13	cdc5c58e237d04a50806f2a24789d9d6
1	Bacteria	Actinobacteriota	Actinomycetia	Actinomycetales	Bifidobacteriaceae	Bifidobacterium	Bifidobacterium sp.14	3a5691b6c829b65110f8b8d0bfc0b905
3	Bacteria	Actinobacteriota	Actinomycetia	Actinomycetales	Bifidobacteriaceae	Bifidobacterium	Bifidobacterium callitrichidarum/catenulatum/gallicum/kashiwanohense/luteum/pseudocatenulatum/sp002742445/sp004562975	cd6623c32ce6101ec02e15a718d884e0
1	Bacteria	Actinobacteriota	Actinomycetia	Actinomycetales	Bifidobacteriaceae	Bifidobacterium	Bifidobacterium dentium/moukalabense	8614b99c2edb22772fdf76c2a2e9e8b8
1	Bacteria	Actinobacteriota	Actinomycetia	Actinomycetales	Bifidobacteriaceae	Bifidobacterium	Bifidobacterium sp.15	dedc4dbef10c55bb0703b0c14897a9c8
1	Bacteria	Actinobacteriota	Actinomycetia	Actinomycetales	Bifidobacteriaceae	Bifidobacterium	Bifidobacterium sp003585735/sp003585845/vaginale_C/vaginale_E/vaginale_G/vaginale_H	0c4699649b1bca69c2ecf90d80b3d714
1	Bacteria	Actinobacteriota	Actinomycetia	Actinomycetales	Bifidobacteriaceae	Bifidobacterium	Bifidobacterium sp002884815/vaginale	19a083c0a0e9c5eede84da9ae3de327a
1	Bacteria	Actinobacteriota	Actinomycetia	Actinomycetales	Bifidobacteriaceae	Scardovia	Scardovia wiggsiae	986722c18dc47d23e2d9f2fb89ceed60
1	Bacteria	Actinobacteriota	Actinomycetia	Actinomycetales	Actinomycetaceae	Actinomyces	Actinomyces bowdenii_A/bowdenii_B/sp013185035	b72e3fa0df5b620c79ce1a65218146ee
1	Bacteria	Actinobacteriota	Actinomycetia	Actinomycetales	Actinomycetaceae	Actinomyces	Actinomyces urogenitalis	0d51556ff3548c4f3b1e7f62cb31fd86
1	Bacteria	Actinobacteriota	Actinomycetia	Actinomycetales	Actinomycetaceae	Actinomyces	Actinomyces sp.	abd393c0fb481253b2d9543f0634ca60
1	Bacteria	Actinobacteriota	Actinomycetia	Actinomycetales	Actinomycetaceae	Varibaculum	Varibaculum cambriense/cambriense_A/cambriense_B/massiliense	bc7d2b0eb0da11ab518c6c5e46526577
1	Bacteria	Actinobacteriota	Actinomycetia	Actinomycetales	Actinomycetaceae	Varibaculum	Varibaculum timonense	3cdf5cca0511596161a98f1c2c92b182
1	Bacteria	Actinobacteriota	Actinomycetia	Actinomycetales	Actinomycetaceae	Winkia	Winkia neuii/sp002849225	8e61d77c1f6555e76891ac27d58707c6
1	Bacteria	Actinobacteriota	Actinomycetia	Actinomycetales	Actinomycetaceae	Pauljensenia	Pauljensenia radingae_A	c3337ad671c2e29ae30b948f8c25041d
1	Bacteria	Actinobacteriota	Actinomycetia	Actinomycetales	Actinomycetaceae	Pauljensenia	Pauljensenia sp.	48be385228d2ee7a62d345f0e45b2a16
1	Bacteria	Actinobacteriota	Actinomycetia	Actinomycetales	Actinomycetaceae	Pauljensenia	Pauljensenia turicensis	36059ba42ea65f8d93d75efb73b4ab69
4	Bacteria	Actinobacteriota	Actinomycetia	Actinomycetales	Actinomycetaceae	Pauljensenia	Pauljensenia odontolytica/odontolytica_A/odontolytica_B/odontolytica_C/sp000185285/sp000411415/sp000466265/sp001064145/sp001072465/sp001838165	939b42558b4f9c7088da2d4c05cbbdb2
1	Bacteria	Actinobacteriota	Actinomycetia	Actinomycetales	Actinomycetaceae	Pauljensenia	Pauljensenia pyogenes_A/sp000308055	3e5fba13aed9ea12f9e1a42b3e1acc30
1	Bacteria	Actinobacteriota	Actinomycetia	Actinomycetales	Actinomycetaceae	Actinotignum	Actinotignum sanguinis/schaalii/schaalii_A	0938c318f1001a6a8761fe8f26ab3029
1	Bacteria	Actinobacteriota	Actinomycetia	Actinomycetales	Actinomycetaceae	Actinobaculum	Actinobaculum massiliense	1d00b753dbc4946239f155fd9eb20d8e
1	Bacteria	Actinobacteriota	Actinomycetia	Actinomycetales	Dermabacteraceae	Dermabacter	Dermabacter sp.	09efd4982be79756a70f3b739241efda
1	Bacteria	Actinobacteriota	Actinomycetia	Actinomycetales	Dermabacteraceae	Dermabacter	Dermabacter hominis	a600fd96dfa563a51e8e70a101cb6fb2
1	Bacteria	Actinobacteriota	Actinomycetia	Actinomycetales	Micrococcaceae	Rothia	Rothia mucilaginosa_B	d86e391facf1e9d1917bca108c98acab
1	Bacteria	Actinobacteriota	Actinomycetia	Actinomycetales	Micrococcaceae	Rothia	Rothia sp.	8bf0765bead8b7ec107418c501417e0f
1	Bacteria	Actinobacteriota	Actinomycetia	Actinomycetales	Micrococcaceae	Rothia	Rothia sp.2	d60f98c9d37d9826084e1cced55a9603
1	Bacteria	Actinobacteriota	Actinomycetia	Actinomycetales	Micrococcaceae	Rothia	Rothia mucilaginosa_A/sp001808955	a3152563dd5a012fb7bedbc683ba5daa
1	Bacteria	Actinobacteriota	Actinomycetia	Actinomycetales	Micrococcaceae	Rothia	Rothia sp.3	25cd6c22fd2bb5fd97c63c527a7ae9c8
1	Bacteria	Actinobacteriota	Actinomycetia	Mycobacteriales	Mycobacteriaceae	Corynebacterium	Corynebacterium aurimucosum_E/kefirresidentii/tuberculostearicum/tuberculostearicum_C	00e3d921c05a9e74121e712673d1fe21
1	Bacteria	Actinobacteriota	Actinomycetia	Mycobacteriales	Mycobacteriaceae	Corynebacterium	Corynebacterium propinquum/pseudodiphtheriticum	e27a32ae031705066d3792b244f60d5d
1	Bacteria	Actinobacteriota	Coriobacteriia	Coriobacteriales	Atopobiaceae	Lancefieldella	Lancefieldella sp000564995	f41bbd20ef123b188edf2e2fb246658a
1	Bacteria	Actinobacteriota	Coriobacteriia	Coriobacteriales	Atopobiaceae	Fannyhessea	Fannyhessea vaginae	1c3398a24441d53ce313d7759c7fd9f2
1	Bacteria	Actinobacteriota	Coriobacteriia	Coriobacteriales	Coriobacteriaceae	Collinsella	Collinsella sp008014645/tanakaei	b2edd60ce3a8f8778e0330cc88fbfddb
1	Bacteria	Actinobacteriota	Coriobacteriia	Coriobacteriales	Coriobacteriaceae	Collinsella	Collinsella intestinalis/sp003479805/stercoris	fb041a033ee8db53d37c9ded377c2891
3	Bacteria	Actinobacteriota	Coriobacteriia	Coriobacteriales	Coriobacteriaceae	Collinsella	Collinsella aerofaciens/aerofaciens_A/aerofaciens_E/aerofaciens_F/aerofaciens_G/aerofaciens_H/aerofaciens_J/aerofaciens_L/aerofaciens_N/sp000434535/sp000763055/sp002232035/sp003436275/sp003437035/sp003438495/sp003439125/sp003458415/sp003459245/sp003459505/sp003462685/sp003465825/sp003466125/sp003469185/sp003469205/sp003470665/sp003471585/sp003487125/sp004554255/sp900540895/sp900541015/sp900541025…	3aac5ec59c4f41b64a70357d5b971d46
4	Bacteria	Actinobacteriota	Coriobacteriia	Coriobacteriales	Eggerthellaceae	Senegalimassilia	Senegalimassilia anaerobia	a4509b13baa96bceb7547508b1aa4242
1	Bacteria	Actinobacteriota	Coriobacteriia	Coriobacteriales	Eggerthellaceae	Senegalimassilia	Senegalimassilia sp.	cb8be705be26572e33f8d03b1b105173
1	Bacteria	Actinobacteriota	Coriobacteriia	Coriobacteriales	Eggerthellaceae	Slackia_A	Slackia_A isoflavoniconvertens	837cc942d0092860283f46dacf727a83
4	Bacteria	Actinobacteriota	Coriobacteriia	Coriobacteriales	Eggerthellaceae	Adlercreutzia	Adlercreutzia celatus_A/equolifaciens	e99f8534f5f920da76e9b1410173d620
4	Bacteria	Actinobacteriota	Coriobacteriia	Coriobacteriales	Eggerthellaceae	Gordonibacter	Gordonibacter pamelaeae	7ec3b1f3ad8244a3b5e0aa11435bbd1e
2	Bacteria	Actinobacteriota	Coriobacteriia	Coriobacteriales	Eggerthellaceae	Eggerthella	Eggerthella lenta	6bf73a7c7b724b4c6768336648a7887f
1	Bacteria	Actinobacteriota	Coriobacteriia	Coriobacteriales	Eggerthellaceae	Eggerthella	Eggerthella sp.	762347523c85238de6725af0bc47ad2b
4	Bacteria	Actinobacteriota	Coriobacteriia	Coriobacteriales	Eggerthellaceae	Family_Eggerthellaceae	Family_Eggerthellaceae	1a718f35070746940573601806eb8810
4	Bacteria	Actinobacteriota	Coriobacteriia	Coriobacteriales	Eggerthellaceae	CAG-1427	CAG-1427 sp.	545c1759a0d9045ba612a41ba620a4d1
1	Bacteria	Proteobacteria	Alphaproteobacteria	Rhodobacterales	Rhodobacteraceae	Cereibacter_A	Cereibacter_A johrii/sphaeroides	0b9eb805fe69e6b30f548531b90d5688
1	Bacteria	Proteobacteria	Alphaproteobacteria	Rhodobacterales	Rhodobacteraceae	Paracoccus	Paracoccus aminovorans/chinensis/halophilus/sp000518925/subflavus	88516e8360a25d10e03f10bb0df10e06
1	Bacteria	Proteobacteria	Alphaproteobacteria	Rhizobiales	Rhizobiaceae	Allorhizobium	Allorhizobium fabrum/pusense/putida_N/salinitolerans/sp005938205/sp900012625/sp900176345/tumefaciens_B	7a7bb162f76087e4947fe0c980bf56e7
1	Bacteria	Proteobacteria	Alphaproteobacteria	Rhizobiales_A	Rhizobiaceae_A	Phyllobacterium	Phyllobacterium bourgognense/brassicacearum/endophyticum/myrsinacearum/myrsinacearum_A/sophorae/sp900104355/sp900113985/sp900472835/sp900473175/trifolii/zundukense	66d7bd339a52e16adbe7c93c31b6a12a
1	Bacteria	Proteobacteria	Alphaproteobacteria	RF32	CAG-239	51-20	51-20 sp.	dd9d3fb36a2ce1a5f6e99373943cb62c
4	Bacteria	Proteobacteria	Alphaproteobacteria	RF32	CAG-239	CAG-495	CAG-495 sp.	69c79e8f047a62b91945789163af472a
1	Bacteria	Proteobacteria	Alphaproteobacteria	RF32	CAG-239	51-20	51-20 sp.2	b9c0708e19e840aedd08120324ef68f3
2	Bacteria	Proteobacteria	Alphaproteobacteria	RF32	CAG-239	CAG-495	CAG-495 sp001917125	1d0831cd5450dbff194da1403d5f94f8
4	Bacteria	Proteobacteria	Alphaproteobacteria	RF32	CAG-239	RUG410	RUG410 sp.	87cad98ce902562f86d415ac4fba6007
4	Bacteria	Firmicutes_A	Clostridia	Oscillospirales	Acutalibacteraceae	Family_Acutalibacteraceae	Family_Acutalibacteraceae	0b3c13b99c784c5a92ae4e531a4f3691
1	Bacteria	Firmicutes_A	Clostridia	Lachnospirales	Cellulosilyticaceae	Niameybacter	Niameybacter sp900549765	08fe775b06f31faf9853fce689ea4e04
1	Bacteria	Firmicutes_A	Clostridia	Lachnospirales	Cellulosilyticaceae	Cellulosilyticum	Cellulosilyticum lentocellum	e0b5cfe93515c31f8ed4eb381a7a6ba6
1	Bacteria	Proteobacteria	Gammaproteobacteria	Enterobacterales	Enterobacteriaceae	Escherichia	Escherichia sp.	dfabd8f6b8f0cd3ee0e7f2254280a8da
2	Bacteria	Proteobacteria	Gammaproteobacteria	Enterobacterales	Enterobacteriaceae	Escherichia	Escherichia sp.2	2424186d5cc0b7c749f3645004df6a17
1	Bacteria	Proteobacteria	Gammaproteobacteria	Enterobacterales	Enterobacteriaceae	Escherichia	Escherichia sp.3	63af8ad11a93f44fe021af545073022c
1	Bacteria	Proteobacteria	Gammaproteobacteria	Enterobacterales	Enterobacteriaceae	Escherichia	Escherichia sp.4	1493c1622872ce87dddce57bc9e1efed
1	Bacteria	Proteobacteria	Gammaproteobacteria	Enterobacterales	Enterobacteriaceae	Escherichia	Escherichia sp.5	b830a4f4852476801efcdc768597da0f
1	Bacteria	Proteobacteria	Gammaproteobacteria	Enterobacterales	Enterobacteriaceae	Escherichia	Escherichia coli/coli_C/coli_D/fergusonii/flagellatus/flexneri/marmotae/sp001660175/sp002965065/sp004211955/sp004522215/sp004555055/sp005843885/sp014237865/sp900764415	20cfe7f61d18f6525cc71caae0ab28dc
1	Bacteria	Proteobacteria	Gammaproteobacteria	Enterobacterales	Enterobacteriaceae	Escherichia	Escherichia sp.6	4c6bfe47f0d10f63e58e83451b65f4ea
1	Bacteria	Proteobacteria	Gammaproteobacteria	Enterobacterales	Enterobacteriaceae	Escherichia	Escherichia sp.7	e19d099ae7e7587eaa48af0f58917a0f
1	Bacteria	Proteobacteria	Gammaproteobacteria	Enterobacterales	Enterobacteriaceae	Escherichia	Escherichia sp.8	4f398e583c128ca118a568c035688181
1	Bacteria	Proteobacteria	Gammaproteobacteria	Enterobacterales	Enterobacteriaceae	Escherichia	Escherichia sp.9	80649f7238267d4f11064fda06643556
1	Bacteria	Proteobacteria	Gammaproteobacteria	Enterobacterales	Enterobacteriaceae	Escherichia	Escherichia sp.10	ba8206a4800297940e321383e59ea78d
1	Bacteria	Proteobacteria	Gammaproteobacteria	Enterobacterales	Enterobacteriaceae	Escherichia	Escherichia sp.11	ca5b361de17735832589bf23a05c12d4
1	Bacteria	Proteobacteria	Gammaproteobacteria	Enterobacterales	Enterobacteriaceae	Escherichia	Escherichia sp.12	ead20c65ae869badd121f8ecc6bb1b67
1	Bacteria	Proteobacteria	Gammaproteobacteria	Enterobacterales	Enterobacteriaceae	Escherichia	Escherichia sp.13	cd638b7ca9cc10d6e5fa9971806b20c6
1	Bacteria	Proteobacteria	Gammaproteobacteria	Enterobacterales	Enterobacteriaceae	Escherichia	Escherichia sp.14	aacb4ac207f6515cb73c56fa4a1e8956
1	Bacteria	Proteobacteria	Gammaproteobacteria	Enterobacterales	Enterobacteriaceae	Escherichia	Escherichia sp.15	3ecacf50eb3dd5b811eb7ad8a38bd82a
1	Bacteria	Proteobacteria	Gammaproteobacteria	Enterobacterales	Enterobacteriaceae	Escherichia	Escherichia sp.16	f51d5a952c919697ecd66b568c084c97
1	Bacteria	Proteobacteria	Gammaproteobacteria	Enterobacterales	Enterobacteriaceae	Escherichia	Escherichia sp.17	c745822f19f4bb839983fd66a5972d93
1	Bacteria	Proteobacteria	Gammaproteobacteria	Enterobacterales	Enterobacteriaceae	Escherichia	Escherichia sp.18	ede5a9e95386fcc7c4da47d45164db81
1	Bacteria	Proteobacteria	Gammaproteobacteria	Enterobacterales	Enterobacteriaceae	Escherichia	Escherichia sp.19	13b2113faffc5fe42c9d40194a1414cc
1	Bacteria	Proteobacteria	Gammaproteobacteria	Enterobacterales	Enterobacteriaceae	Escherichia	Escherichia sp.20	83723588154fa4691263d60870dfd15b
1	Bacteria	Proteobacteria	Gammaproteobacteria	Enterobacterales	Enterobacteriaceae	Escherichia	Escherichia sp.21	8ebe1c206892c6b3c1107e2fa4e93df9
1	Bacteria	Proteobacteria	Gammaproteobacteria	Enterobacterales	Enterobacteriaceae	Escherichia	Escherichia sp.22	3b1068f54c0829787163abc0225c2769
1	Bacteria	Proteobacteria	Gammaproteobacteria	Enterobacterales	Enterobacteriaceae	Escherichia	Escherichia sp.23	6b7451f00a4d817450a5be0ff2893f24
1	Bacteria	Proteobacteria	Gammaproteobacteria	Enterobacterales	Enterobacteriaceae	Escherichia	Escherichia sp.24	78a0b0d1066901cd2956111060e375e1
1	Bacteria	Proteobacteria	Gammaproteobacteria	Enterobacterales	Enterobacteriaceae	Escherichia	Escherichia sp.25	50b01b5a1d570c4e88b07e72b4c26677
1	Bacteria	Proteobacteria	Gammaproteobacteria	Enterobacterales	Enterobacteriaceae	Escherichia	Escherichia sp.26	e89deffbf236ceb5b5715a75ff565362
3	Bacteria	Firmicutes_C	Negativicutes	Veillonellales	Dialisteraceae	Dialister	Dialister sp900765565/wadsworthia	98ca3e41d8d589d9d94aad956b84e054
1	Bacteria	Firmicutes_C	Negativicutes	Veillonellales	Dialisteraceae	Dialister	Dialister sp.	91f28bdcf66a6feb819a65e4d05ecad2
1	Bacteria	Firmicutes_C	Negativicutes	Veillonellales	Dialisteraceae	Dialister	Dialister sp.2	24a3126189147f43030e156d57b2b3df
1	Bacteria	Desulfobacterota	Desulfovibrionia	Desulfovibrionales	Desulfovibrionaceae	Desulfovibrio	Desulfovibrio piger_A	f476bfba3de5b53f358787c28048d6ea
1	Bacteria	Desulfobacterota	Desulfovibrionia	Desulfovibrionales	Desulfovibrionaceae	Mailhella	Mailhella sp004555765/sp900553065/sp900556755	8a897dcb772cbca2a66b3f856a545cf2
1	Bacteria	Desulfobacterota	Desulfovibrionia	Desulfovibrionales	Desulfovibrionaceae	Desulfovibrio	Desulfovibrio fairfieldensis/sp900540515	2a833679eb4dd73812269ba105024f03
1	Bacteria	Desulfobacterota	Desulfovibrionia	Desulfovibrionales	Desulfovibrionaceae	Desulfovibrio	Desulfovibrio desulfuricans/desulfuricans_C/sp009929215	85258b9b5a559e05235b3d88725fc7e5
1	Bacteria	Proteobacteria	Gammaproteobacteria	Enterobacterales	Pasteurellaceae	Family_Pasteurellaceae	Family_Pasteurellaceae	7312b7602712619f20a82a9a1f7a0fab
1	Bacteria	Proteobacteria	Gammaproteobacteria	Enterobacterales	Pasteurellaceae	Aggregatibacter	Aggregatibacter aphrophilus/kilianii/segnis_A	093355cfd1a0f692798e35d010b37b79
2	Bacteria	Proteobacteria	Gammaproteobacteria	Enterobacterales	Pasteurellaceae	Haemophilus_D	Haemophilus_D parainfluenzae_J/pittmaniae/sp001679485	a6002cb5901066f5d4b9c2c75565261e
1	Bacteria	Proteobacteria	Gammaproteobacteria	Enterobacterales	Pasteurellaceae	Haemophilus	Haemophilus haemolyticus/haemolyticus_I/haemolyticus_J/influenzae/influenzae_D/influenzae_E/influenzae_F/sp001276515/sp002998595	a788d9e0d723c68e3207e6d7ec7777cd
1	Bacteria	Proteobacteria	Gammaproteobacteria	Enterobacterales	Pasteurellaceae	Haemophilus	Haemophilus sp.	84df099c8c5c5fb5fdea22af665977e8
1	Bacteria	Proteobacteria	Gammaproteobacteria	Enterobacterales	Pasteurellaceae	Haemophilus	Haemophilus aegyptius	938b0d5cd32e8f1e29ed5210be4ecae3
1	Bacteria	Proteobacteria	Gammaproteobacteria	Enterobacterales	Pasteurellaceae	Haemophilus_D	Haemophilus_D sp.	174e3a0bc0e7532c09dc344027416c7a
2	Bacteria	Proteobacteria	Gammaproteobacteria	Enterobacterales	Pasteurellaceae	Haemophilus_A	Haemophilus_A parahaemolyticus/paraphrohaemolyticus/sputorum	23fd935effd62858dd84fbd5ecf064e6
2	Bacteria	Proteobacteria	Gammaproteobacteria	Enterobacterales	Pasteurellaceae	Basfia_A	Basfia_A porcinus	aa1f9f422a0a2a2fffb5b855f0d8a22f
2	Bacteria	Proteobacteria	Gammaproteobacteria	Enterobacterales	Pasteurellaceae	Haemophilus_D	Haemophilus_D flavescens/parainfluenzae/parainfluenzae_A/parainfluenzae_K/parainfluenzae_L/parainfluenzae_M/parainfluenzae_N/sp001815355/sp001917175/sp900764435	09f40ecbf3e85287e0d5c86d947293f7
1	Bacteria	Proteobacteria	Gammaproteobacteria	Enterobacterales	Pasteurellaceae	Haemophilus_D	Haemophilus_D sp.2	683dd032a0c76115903c0e9d92b522f4
1	Bacteria	Proteobacteria	Gammaproteobacteria	Enterobacterales	Pasteurellaceae	Haemophilus_D	Haemophilus_D sp.3	f59d8cf95bfa5f5a424726da030f4894
1	Bacteria	Proteobacteria	Gammaproteobacteria	Enterobacterales	Pasteurellaceae	Haemophilus_D	Haemophilus_D sp.4	e940439f2b2d0c81413cbf6ba9fb6bfd
1	Bacteria	Proteobacteria	Gammaproteobacteria	Enterobacterales	Pasteurellaceae	Basfia_A	Basfia_A sp.	2a8dd60a2595505243f9c846d0be89b9
1	Bacteria	Proteobacteria	Gammaproteobacteria	Burkholderiales	Burkholderiaceae	Comamonas	Comamonas testosteroni_B	c7357d96db6e771a1dd7735d24265825
2	Bacteria	Proteobacteria	Gammaproteobacteria	Burkholderiales	Burkholderiaceae	Sutterella	Sutterella sp.	5d5b6f7338886b07633f8aa5be00df2c
3	Bacteria	Proteobacteria	Gammaproteobacteria	Burkholderiales	Burkholderiaceae	Sutterella	Sutterella sp900752815/wadsworthensis_A	50d037b60aa843e31c8aff7450df8410
1	Bacteria	Proteobacteria	Gammaproteobacteria	Burkholderiales	Burkholderiaceae	Sutterella	Sutterella sp.2	d6234176e79bcf01aa5083a815f497f2
1	Bacteria	Proteobacteria	Gammaproteobacteria	Burkholderiales	Burkholderiaceae	Sutterella	Sutterella sp.3	ef57d8072898184593bdf764cb620295
1	Bacteria	Proteobacteria	Gammaproteobacteria	Burkholderiales	Burkholderiaceae	Sutterella	Sutterella faecalis	43f3f2e3459e11bed9c3b5c187767fcf
3	Bacteria	Proteobacteria	Gammaproteobacteria	Burkholderiales	Burkholderiaceae	Sutterella	Sutterella wadsworthensis	56eb226a214d3ad80951bea6b746946a
1	Bacteria	Proteobacteria	Gammaproteobacteria	Burkholderiales	Burkholderiaceae	Sutterella	Sutterella sp.4	76a27cc21cfbbe23d070d64fbf90d454
1	Bacteria	Proteobacteria	Gammaproteobacteria	Burkholderiales	Burkholderiaceae	Parasutterella	Parasutterella sp.	40d0699f6b4d75284a568209b9994458
1	Bacteria	Proteobacteria	Gammaproteobacteria	Burkholderiales	Burkholderiaceae	Parasutterella	Parasutterella sp.2	bf497848d9d2ab32ca375df06aa71a8d
3	Bacteria	Proteobacteria	Gammaproteobacteria	Burkholderiales	Burkholderiaceae	Parasutterella	Parasutterella excrementihominis/sp000980495	cf39b94723be8d7c4e5b41f4b20dab44
1	Bacteria	Proteobacteria	Gammaproteobacteria	Burkholderiales	Burkholderiaceae	Mesosutterella	Mesosutterella massiliensis/multiformis	a3a15964ddc124b8ce00bed541c3d8af
1	Bacteria	Proteobacteria	Gammaproteobacteria	Burkholderiales	Burkholderiaceae	Duodenibacillus	Duodenibacillus massiliensis	5b40362893c5119709999408ee8dd8cc
1	Bacteria	Proteobacteria	Gammaproteobacteria	Burkholderiales	Burkholderiaceae	Duodenibacillus	Duodenibacillus sp.	8ccc1a483305848c00b99c6db0802b3f
1	Bacteria	Proteobacteria	Gammaproteobacteria	Burkholderiales	Burkholderiaceae	Duodenibacillus	Duodenibacillus sp003472385	8d97740470f08880aa75151e7b9e6fce
4	Bacteria	Proteobacteria	Gammaproteobacteria	Burkholderiales	Burkholderiaceae	Oxalobacter	Oxalobacter formigenes_B	8b2cc1cf80e34228edb0320e8fc16c6b
1	Bacteria	Proteobacteria	Gammaproteobacteria	Burkholderiales	Neisseriaceae	Neisseria	Neisseria sp.	95c5ada0e7f0203f8c7f75835a20d147
1	Bacteria	Proteobacteria	Gammaproteobacteria	Burkholderiales	Neisseriaceae	Neisseria	Neisseria meningitidis	9b49964cbe6e157c39c5277dff0de921
1	Bacteria	Proteobacteria	Gammaproteobacteria	Burkholderiales	Neisseriaceae	Neisseria	Neisseria cinerea/flavescens_B/flavescens_C/perflava/sp000186165/subflava/subflava_A/subflava_B/subflava_C	262e7277ed7bb04e215acb3faeb73109
1	Bacteria	Proteobacteria	Gammaproteobacteria	Burkholderiales	Neisseriaceae	Neisseria	Neisseria sp.2	0d02931b8ea391025d1c9529d895b4e4
1	Bacteria	Proteobacteria	Gammaproteobacteria	Pseudomonadales	Moraxellaceae	Acinetobacter	Acinetobacter sp.	5976b186e33a8bc7aa29c20dfeeb8a78
1	Bacteria	Firmicutes_A	Clostridia	Lachnospirales	Lachnospiraceae	Lachnospira	Lachnospira sp900316325	0c4ba36f81a215044822bfc2b6533315
1	Bacteria	Proteobacteria	Gammaproteobacteria	Pseudomonadales	Moraxellaceae	Acinetobacter	Acinetobacter bouvetii_A/johnsonii/sp002135245/sp002165305/sp003711395	4f3798277f1c02b62dff25c0d710d2fa
1	Bacteria	Proteobacteria	Gammaproteobacteria	Pseudomonadales	Moraxellaceae	Acinetobacter	Acinetobacter baumannii/haemolyticus_A	81f0872af6e986c2248626656059b176
1	Bacteria	Proteobacteria	Gammaproteobacteria	Pseudomonadales	Moraxellaceae	Acinetobacter	Acinetobacter idrijaensis/lwoffii/mesopotamicus/pseudolwoffii/sp001647535/sp001647675	abe4d8ae6feac48213ae7ad7d91a980d
1	Bacteria	Proteobacteria	Gammaproteobacteria	Enterobacterales	Enterobacteriaceae	Family_Enterobacteriaceae	Family_Enterobacteriaceae	375b359f271ffdbadf9e264221389919
1	Bacteria	Proteobacteria	Gammaproteobacteria	Enterobacterales	Enterobacteriaceae	Yersinia	Yersinia aldovae/aleksiciae/aquatilis/aquatilis_B/bercovieri/enterocolitica/enterocolitica_E/enterocolitica_F/enterocolitica_H/frederiksenii/frederiksenii_C/grimesii/hibernica/intermedia/kristensenii/kristensenii_B/kristensenii_C/liquefaciens/massiliensis/mollaretii/pekkanenii/pestis/plymuthica/plymuthica_A/proteamaculans_D/quinivorans/rohdei/similis/sp000743355	f39a7caaa9383a39fda797c574c27a08
1	Bacteria	Proteobacteria	Gammaproteobacteria	Enterobacterales	Enterobacteriaceae	Hafnia	Hafnia alvei/alvei_B/proteus	d1a981080d16f59d33464b22a3d3cbaf
2	Bacteria	Proteobacteria	Gammaproteobacteria	Enterobacterales	Enterobacteriaceae	Proteus	Proteus alimentorum/columbae/hauseri/mirabilis_B/sp001722135/sp003144395/sp003144405/sp008808075/terrae/vulgaris_B	61a17521205595348e780b36320eaba1
1	Bacteria	Proteobacteria	Gammaproteobacteria	Enterobacterales	Enterobacteriaceae	Proteus	Proteus mirabilis/myxofaciens/sp003144375	6388f6a991692b192be06b09b1976cf6
1	Bacteria	Proteobacteria	Gammaproteobacteria	Enterobacterales	Enterobacteriaceae	Rosenbergiella	Rosenbergiella nectarea/planticola/sp002752555/sp009762255	5d75909126f42602ec3e05c77b16b6d2
1	Bacteria	Proteobacteria	Gammaproteobacteria	Enterobacterales	Enterobacteriaceae	Serratia	Serratia marcescens/marcescens_B/marcescens_F/marcescens_I/marcescens_J/marcescens_K/nematodiphila/surfactantfaciens/ureilytica	6a7a38e869df8f98e23dce502e8409fa
1	Bacteria	Proteobacteria	Gammaproteobacteria	Enterobacterales	Enterobacteriaceae	Family_Enterobacteriaceae	Family_Enterobacteriaceae2	d4f4f46ec402280ae29751a0c0029f51
1	Bacteria	Proteobacteria	Gammaproteobacteria	Enterobacterales	Enterobacteriaceae	Escherichia	Escherichia albertii	41c59a91a80a37ac3f960e34a4c29cda
1	Bacteria	Proteobacteria	Gammaproteobacteria	Enterobacterales	Enterobacteriaceae	Escherichia	Escherichia sp.27	9dea95654e4733e7960e6ea0957d0842
1	Bacteria	Proteobacteria	Gammaproteobacteria	Enterobacterales	Enterobacteriaceae	Rosenbergiella	Rosenbergiella sp.	f3bb227d4684ce397da638d270c79270
1	Bacteria	Proteobacteria	Gammaproteobacteria	Enterobacterales	Enterobacteriaceae	Escherichia	Escherichia sp.28	b6671e7b8b99fee4d606b04c409ea06b
1	Bacteria	Proteobacteria	Gammaproteobacteria	Enterobacterales	Enterobacteriaceae	Family_Enterobacteriaceae	Family_Enterobacteriaceae3	deb0bdec6009f88d3cb68e762aa28ae2
1	Bacteria	Proteobacteria	Gammaproteobacteria	Enterobacterales	Enterobacteriaceae	Escherichia	Escherichia sp000208585	eff22d490541422627e546be4f44601f
1	Bacteria	Proteobacteria	Gammaproteobacteria	Enterobacterales	Enterobacteriaceae	Escherichia	Escherichia sp.29	67e2a2e1dcbb2c6bd3809f20fa5f0601
1	Bacteria	Proteobacteria	Gammaproteobacteria	Enterobacterales	Enterobacteriaceae	Family_Enterobacteriaceae	Family_Enterobacteriaceae4	b07e2dceb62b8245205b1ef79ae021f4
1	Bacteria	Proteobacteria	Gammaproteobacteria	Enterobacterales	Enterobacteriaceae	Leclercia	Leclercia electrica/ornithinolytica/sp002902985/sp003752615	418f03e650968209351d188e18dd1c7e
1	Bacteria	Proteobacteria	Gammaproteobacteria	Enterobacterales	Enterobacteriaceae	Pantoea	Pantoea agglomerans/brenneri/gerundensis/sp002419935/sp003512445/sp008632075/sp900115075	4434d904522c3f016aa715d906835ac9
1	Bacteria	Proteobacteria	Gammaproteobacteria	Enterobacterales	Enterobacteriaceae	Pantoea	Pantoea allii/ananatis/anthophila/calida/conspicua/deleyi/dispersa/dispersa_B/eucrina/gaviniae/persica/sp003813865/sp009830035/stewartii/wallisii	f54a9c522689c4c13629427fb87654fb
1	Bacteria	Proteobacteria	Gammaproteobacteria	Enterobacterales	Enterobacteriaceae	Dickeya	Dickeya aquatica/dadantii/dianthicola/fangzhongdai/lacustris/nigrifluens/roseae/solani/sp013155275/undicola/zeae/zeae_A	53663d940079ffdd7d6541a9869967fa
1	Bacteria	Proteobacteria	Gammaproteobacteria	Enterobacterales	Enterobacteriaceae	Family_Enterobacteriaceae	Family_Enterobacteriaceae5	b29b407a5b7f600c8354c44beae73fc9
1	Bacteria	Proteobacteria	Gammaproteobacteria	Enterobacterales	Enterobacteriaceae	Family_Enterobacteriaceae	Family_Enterobacteriaceae6	5a9b6c8b6ef7adf1e7a809330584fa9e
1	Bacteria	Proteobacteria	Gammaproteobacteria	Enterobacterales	Enterobacteriaceae	Family_Enterobacteriaceae	Family_Enterobacteriaceae7	79ab217c5351662efe4c91c71a5b124a
1	Bacteria	Proteobacteria	Gammaproteobacteria	Enterobacterales	Enterobacteriaceae	Family_Enterobacteriaceae	Family_Enterobacteriaceae8	92f34276b59e304bc7ff966b238d4705
1	Bacteria	Proteobacteria	Gammaproteobacteria	Enterobacterales	Enterobacteriaceae	Family_Enterobacteriaceae	Family_Enterobacteriaceae9	e682b6b712d30c284cf6fbcc548d8fc7
1	Bacteria	Proteobacteria	Gammaproteobacteria	Enterobacterales	Enterobacteriaceae	Family_Enterobacteriaceae	Family_Enterobacteriaceae10	28535332398a46126619e445994634df
1	Bacteria	Proteobacteria	Gammaproteobacteria	Enterobacterales	Enterobacteriaceae	Family_Enterobacteriaceae	Family_Enterobacteriaceae11	7bc7407c94d7043a80982998cbac426d
1	Bacteria	Proteobacteria	Gammaproteobacteria	Enterobacterales	Enterobacteriaceae	Family_Enterobacteriaceae	Family_Enterobacteriaceae12	2125361cdd3ab04fe3a3a4479c69c62b
1	Bacteria	Proteobacteria	Gammaproteobacteria	Enterobacterales	Enterobacteriaceae	Family_Enterobacteriaceae	Family_Enterobacteriaceae13	99dbdac7065e4810f23e0b4b6e6a8887
1	Bacteria	Proteobacteria	Gammaproteobacteria	Enterobacterales	Enterobacteriaceae	Family_Enterobacteriaceae	Family_Enterobacteriaceae14	8f08f1417d3bfcec3b900b849a48d3bb
1	Bacteria	Proteobacteria	Gammaproteobacteria	Enterobacterales	Enterobacteriaceae	Family_Enterobacteriaceae	Family_Enterobacteriaceae15	055a514a92f1cc151afb0fc05b5569b1
1	Bacteria	Proteobacteria	Gammaproteobacteria	Enterobacterales	Enterobacteriaceae	Family_Enterobacteriaceae	Family_Enterobacteriaceae16	56126301cfa5e824234a571f5bb45546
1	Bacteria	Proteobacteria	Gammaproteobacteria	Enterobacterales	Enterobacteriaceae	Family_Enterobacteriaceae	Family_Enterobacteriaceae17	392341ddca6aff75590f9e9012788533
1	Bacteria	Proteobacteria	Gammaproteobacteria	Enterobacterales	Enterobacteriaceae	Citrobacter	Citrobacter braakii/europaeus/freundii_A/freundii_E/gillenii/murliniae/portucalensis/sp002270295/sp002321695/sp004684345/sp005281345/sp009738185/sp010231475/terrigena/werkmanii/youngae	45c4f6f269ec95ff0c8dd594104519e9
1	Bacteria	Proteobacteria	Gammaproteobacteria	Enterobacterales	Enterobacteriaceae	Citrobacter	Citrobacter sp.	f41d881d596f734da3b2359463de9dc7
1	Bacteria	Proteobacteria	Gammaproteobacteria	Enterobacterales	Enterobacteriaceae	Family_Enterobacteriaceae	Family_Enterobacteriaceae18	65f3f8db3225d03b91482ec93119468d
1	Bacteria	Proteobacteria	Gammaproteobacteria	Enterobacterales	Enterobacteriaceae	Family_Enterobacteriaceae	Family_Enterobacteriaceae19	f951a9c30a909df2c21c10c49e6160d9
1	Bacteria	Proteobacteria	Gammaproteobacteria	Enterobacterales	Enterobacteriaceae	Family_Enterobacteriaceae	Family_Enterobacteriaceae20	cd51eef3e1a53d06cd4972546238fe5c
1	Bacteria	Proteobacteria	Gammaproteobacteria	Enterobacterales	Enterobacteriaceae	Family_Enterobacteriaceae	Family_Enterobacteriaceae21	f7b66bfc0f3dfa7afec00c9fd0b013bd
1	Bacteria	Proteobacteria	Gammaproteobacteria	Enterobacterales	Enterobacteriaceae	Family_Enterobacteriaceae	Family_Enterobacteriaceae22	7d9ad7ac9725ce6ca571503509e9a920
1	Bacteria	Proteobacteria	Gammaproteobacteria	Enterobacterales	Enterobacteriaceae	Family_Enterobacteriaceae	Family_Enterobacteriaceae23	c3c617660601e02bc887d008cb8d8cb1
1	Bacteria	Proteobacteria	Gammaproteobacteria	Enterobacterales	Enterobacteriaceae	Family_Enterobacteriaceae	Family_Enterobacteriaceae24	3b7932960fb3bab44cb1309e6062b7a9
1	Bacteria	Proteobacteria	Gammaproteobacteria	Enterobacterales	Enterobacteriaceae	Family_Enterobacteriaceae	Family_Enterobacteriaceae25	369de3f4188833a83eb4650c10c5f55a
1	Bacteria	Proteobacteria	Gammaproteobacteria	Enterobacterales	Enterobacteriaceae	Family_Enterobacteriaceae	Family_Enterobacteriaceae26	4e8b51098d3b598eadf069dcc96e81aa
1	Bacteria	Proteobacteria	Gammaproteobacteria	Enterobacterales	Enterobacteriaceae	Family_Enterobacteriaceae	Family_Enterobacteriaceae27	b1ffe9c598aa4a616fc7b9b1036044c9
1	Bacteria	Proteobacteria	Gammaproteobacteria	Enterobacterales	Enterobacteriaceae	Family_Enterobacteriaceae	Family_Enterobacteriaceae28	a6ae886f37c15b97a2160141e302ef66
1	Bacteria	Proteobacteria	Gammaproteobacteria	Enterobacterales	Enterobacteriaceae	Family_Enterobacteriaceae	Family_Enterobacteriaceae29	7152eb95dfde0df54b4e8ada284beb30
1	Bacteria	Proteobacteria	Gammaproteobacteria	Enterobacterales	Enterobacteriaceae	Citrobacter_A	Citrobacter_A rodentium	c1c0548af37a31a5222fafc9b58f9992
2	Bacteria	Proteobacteria	Gammaproteobacteria	Enterobacterales	Enterobacteriaceae	Citrobacter_A	Citrobacter_A amalonaticus/amalonaticus_C/farmeri/gergoviae/lignolyticus/sedlakii/sp003057745/sp009363175	1099aa16dc16f656847f5ff1158f67f2
1	Bacteria	Proteobacteria	Gammaproteobacteria	Enterobacterales	Enterobacteriaceae	Family_Enterobacteriaceae	Family_Enterobacteriaceae30	f163e7444d53e8be2370d1c3c3d17996
1	Bacteria	Proteobacteria	Gammaproteobacteria	Enterobacterales	Enterobacteriaceae	Family_Enterobacteriaceae	Family_Enterobacteriaceae31	63ccb8ffa518c33c4941126fa8c35434
1	Bacteria	Proteobacteria	Gammaproteobacteria	Enterobacterales	Enterobacteriaceae	Family_Enterobacteriaceae	Family_Enterobacteriaceae32	fb0902634214600139bcf5f940bf1310
1	Bacteria	Proteobacteria	Gammaproteobacteria	Enterobacterales	Enterobacteriaceae	Family_Enterobacteriaceae	Family_Enterobacteriaceae33	db11a29cba69110d96b3ce61ff326368
1	Bacteria	Proteobacteria	Gammaproteobacteria	Enterobacterales	Enterobacteriaceae	Morganella	Morganella morganii_A/morganii_B	705da2e88a1aaa0c02b27eab4a642b72
1	Bacteria	Proteobacteria	Gammaproteobacteria	Pseudomonadales	Moraxellaceae	Moraxella	Moraxella catarrhalis/nonliquefaciens	aa0d9eb04bfc40cf6079830cf147dea2
1	Bacteria	Campylobacterota	Campylobacteria	Campylobacterales	Helicobacteraceae	Helicobacter	Helicobacter pylori/pylori_A/pylori_BU/pylori_C/pylori_CG/pylori_CH	3d53a81dc0bd2aed0641d255cbf060a3
1	Bacteria	Campylobacterota	Campylobacteria	Campylobacterales	Campylobacteraceae	Campylobacter_B	Campylobacter_B hominis	b0e408cea46e6fe2645396bbcb408fe5
1	Bacteria	Bacteroidota	Bacteroidia	Bacteroidales	Tannerellaceae	Parabacteroides	Parabacteroides distasonis_A	6034a50ff13d417f101af70698db8b86
1	Bacteria	Bacteroidota	Bacteroidia	Bacteroidales	Tannerellaceae	Parabacteroides	Parabacteroides sp.	c1aa10f7c4cc36e384d756887f347038
1	Bacteria	Bacteroidota	Bacteroidia	Bacteroidales	Dysgonomonadaceae	Dysgonomonas	Dysgonomonas capnocytophagoides	d34ae33d6d3b7263fbb06ee56f42cad5
1	Bacteria	Bacteroidota	Bacteroidia	Bacteroidales	Tannerellaceae	Parabacteroides	Parabacteroides sp.2	72e16d877f702f8be3f0ec1fbac93101
1	Bacteria	Bacteroidota	Bacteroidia	Bacteroidales	Tannerellaceae	Parabacteroides	Parabacteroides sp.3	5403aaf433089984508a736253d18953
1	Bacteria	Bacteroidota	Bacteroidia	Bacteroidales	Tannerellaceae	Parabacteroides	Parabacteroides sp.4	67f753bd354f76bf8b2ede61c8f4fed9
1	Bacteria	Bacteroidota	Bacteroidia	Bacteroidales	Tannerellaceae	Parabacteroides	Parabacteroides sp.5	bba2082e3614e1fe63e954be2f456cae
1	Bacteria	Bacteroidota	Bacteroidia	Bacteroidales	Tannerellaceae	Parabacteroides	Parabacteroides sp.6	346e8395cb6b9d9cc4c19dcb29ce2cba
1	Bacteria	Bacteroidota	Bacteroidia	Bacteroidales	Tannerellaceae	Parabacteroides	Parabacteroides sp.7	9866cff3ad8af0c33b64c2ba42de4927
1	Bacteria	Bacteroidota	Bacteroidia	Bacteroidales	Tannerellaceae	Parabacteroides	Parabacteroides sp.8	aee1fab5e99b5436b480ce98fe55161d
1	Bacteria	Bacteroidota	Bacteroidia	Bacteroidales	Tannerellaceae	Parabacteroides	Parabacteroides sp.9	3e04dc9089feb2f83303287b5a8d5a2f
3	Bacteria	Bacteroidota	Bacteroidia	Bacteroidales	UBA932	CAG-831	CAG-831 merdae/sp900544175	9de139f2ed56b6ef28d097e0fb0fa453
1	Bacteria	Bacteroidota	Bacteroidia	Bacteroidales	UBA932	CAG-831	CAG-831 sp.	d2352cfbc26cda94f42ada4ce0afb5b5
1	Bacteria	Bacteroidota	Bacteroidia	Bacteroidales	Tannerellaceae	Parabacteroides	Parabacteroides sp003480915	4e833a14d656780c3cb0d998b5f411cb
1	Bacteria	Bacteroidota	Bacteroidia	Bacteroidales	Tannerellaceae	Parabacteroides	Parabacteroides goldsteinii	40bb420204fee1eb9eed7be7d6a3fcbd
1	Bacteria	Bacteroidota	Bacteroidia	Bacteroidales	Tannerellaceae	Parabacteroides	Parabacteroides massiliensis	3f7dfd882eff30d7adb6278381fe1758
1	Bacteria	Bacteroidota	Bacteroidia	Bacteroidales	Tannerellaceae	Parabacteroides	Parabacteroides johnsonii	8e7c76a6c0f29d85c590e67213adaa0f
1	Bacteria	Bacteroidota	Bacteroidia	Bacteroidales	Tannerellaceae	Parabacteroides	Parabacteroides sp.10	7924d6e8ad46c13d40e2cfff0785b65c
1	Bacteria	Bacteroidota	Bacteroidia	Bacteroidales	Tannerellaceae	Parabacteroides	Parabacteroides sp.11	cfe8b97dd0199d5452181e35cec6f55e
1	Bacteria	Bacteroidota	Bacteroidia	Bacteroidales	Tannerellaceae	Parabacteroides	Parabacteroides sp.12	1465037ba435c15997b79c2224390f01
1	Bacteria	Bacteroidota	Bacteroidia	Bacteroidales	Tannerellaceae	Parabacteroides	Parabacteroides sp.13	06618917cf1355f1f0a33962e2413531
1	Bacteria	Bacteroidota	Bacteroidia	Bacteroidales	Tannerellaceae	Parabacteroides	Parabacteroides sp.14	3ac537e2e13d5af4fc409bb4726dbbcd
1	Bacteria	Bacteroidota	Bacteroidia	Bacteroidales	Tannerellaceae	Parabacteroides	Parabacteroides sp.15	12e167e6ed7878f477f2086c12dc4fc0
1	Bacteria	Bacteroidota	Bacteroidia	Bacteroidales	Tannerellaceae	Parabacteroides	Parabacteroides sp.16	a14426aa5ce73cc49c732fe469c24d2a
1	Bacteria	Bacteroidota	Bacteroidia	Bacteroidales	Tannerellaceae	Parabacteroides	Parabacteroides sp.17	5d8fdd2eef4bca4ced7820d0be3f833e
2	Bacteria	Bacteroidota	Bacteroidia	Bacteroidales	Tannerellaceae	Parabacteroides	Parabacteroides distasonis	02985759c1ee39be5cc8ca5d48054b1c
1	Bacteria	Bacteroidota	Bacteroidia	Bacteroidales	Tannerellaceae	Parabacteroides	Parabacteroides sp.18	6ac1e92343e54b69830542df84261c2e
1	Bacteria	Bacteroidota	Bacteroidia	Bacteroidales	Tannerellaceae	Parabacteroides	Parabacteroides sp.19	6b0108228c70a46ca323e927d86747f0
1	Bacteria	Bacteroidota	Bacteroidia	Bacteroidales	Tannerellaceae	Parabacteroides	Parabacteroides sp.20	207cc2dad1f5530501c4aa8d0948f41e
1	Bacteria	Bacteroidota	Bacteroidia	Bacteroidales	Tannerellaceae	Parabacteroides	Parabacteroides sp.21	b411bdf72ff49585b1b1d6058244f6ee
1	Bacteria	Bacteroidota	Bacteroidia	Bacteroidales	Tannerellaceae	Parabacteroides	Parabacteroides sp.22	81d1d6e6249c94f4de7e6936e4b7e9c5
1	Bacteria	Bacteroidota	Bacteroidia	Bacteroidales	Tannerellaceae	Parabacteroides	Parabacteroides sp.23	c7c46fe24a0ed14088ac686b391253c7
1	Bacteria	Bacteroidota	Bacteroidia	Bacteroidales	Tannerellaceae	Parabacteroides	Parabacteroides sp.24	8b6432496d22947e776670c0e6d2cc70
1	Bacteria	Bacteroidota	Bacteroidia	Bacteroidales	Tannerellaceae	Parabacteroides	Parabacteroides sp.25	e8037325737ce6ee97eabc70a5044ec1
1	Bacteria	Bacteroidota	Bacteroidia	Bacteroidales	Tannerellaceae	Parabacteroides	Parabacteroides sp.26	84519b199c1ab1177c14a662f1759f44
1	Bacteria	Bacteroidota	Bacteroidia	Bacteroidales	Tannerellaceae	Parabacteroides	Parabacteroides sp.27	c2c62d069187956dab40cf1570e5d1c1
1	Bacteria	Bacteroidota	Bacteroidia	Bacteroidales	Tannerellaceae	Parabacteroides	Parabacteroides sp.28	eb6fbfedc9c414de82d4661da89a43fa
1	Bacteria	Bacteroidota	Bacteroidia	Bacteroidales	Tannerellaceae	Parabacteroides	Parabacteroides sp.29	f76c6d98d3861f9f9b032315c5b1028a
2	Bacteria	Bacteroidota	Bacteroidia	Bacteroidales	Tannerellaceae	Parabacteroides	Parabacteroides sp.30	34e3f6dcc1ea83f1487d28b95d3ed445
2	Bacteria	Bacteroidota	Bacteroidia	Bacteroidales	Tannerellaceae	Parabacteroides	Parabacteroides sp.31	a6445f15a4e2d19c03f89374f7c0022b
1	Bacteria	Bacteroidota	Bacteroidia	Bacteroidales	Tannerellaceae	Parabacteroides	Parabacteroides sp.32	fe1a99b215fddfb483c754adf831a285
1	Bacteria	Bacteroidota	Bacteroidia	Bacteroidales	Tannerellaceae	Parabacteroides	Parabacteroides sp.33	9b3e8a7dd80b5aea0dec40022ff55521
1	Bacteria	Bacteroidota	Bacteroidia	Bacteroidales	Tannerellaceae	Parabacteroides	Parabacteroides sp.34	d7246de1712aa56cc2df8b42eb2bd98c
1	Bacteria	Bacteroidota	Bacteroidia	Bacteroidales	Bacteroidaceae	Prevotella	Prevotella sp.	3eb9fe16e247d325dc421f1d271f3484
1	Bacteria	Bacteroidota	Bacteroidia	Bacteroidales	Bacteroidaceae	Prevotella	Prevotella rara	f44208313ae0d6c30c04f7524c3a56b9
1	Bacteria	Bacteroidota	Bacteroidia	Bacteroidales	Bacteroidaceae	Prevotella	Prevotella sp.2	8bbb8a9034b37e27a0c71729e90e86c7
2	Bacteria	Bacteroidota	Bacteroidia	Bacteroidales	Bacteroidaceae	Prevotella	Prevotella buccae	b5c90ce3962416d71d5071da60b6ff05
2	Bacteria	Bacteroidota	Bacteroidia	Bacteroidales	Bacteroidaceae	Prevotella	Prevotella sp.3	eae785b902cef8893ff591183dfa4efd
1	Bacteria	Bacteroidota	Bacteroidia	Bacteroidales	Barnesiellaceae	Barnesiella	Barnesiella sp.	28619ef295b27c9df2977b6c41ad5e91
4	Bacteria	Bacteroidota	Bacteroidia	Bacteroidales	Barnesiellaceae	Barnesiella	Barnesiella sp003150885	8af1ab36fef5f2fe212758cb2249e92c
1	Bacteria	Bacteroidota	Bacteroidia	Bacteroidales	Porphyromonadaceae	Porphyromonas_A	Porphyromonas_A sp001808555	3d88308a5642ccca166eb1baf25371d5
4	Bacteria	Bacteroidota	Bacteroidia	Bacteroidales	Porphyromonadaceae	Porphyromonas_A	Porphyromonas_A sp.	fe6a454d4ca41b26ade90ff11383f772
1	Bacteria	Bacteroidota	Bacteroidia	Chitinophagales	Chitinophagaceae	UBA1930	UBA1930 sp004028795	553e58db769fb6d3b9fb0843db2d6704
1	Bacteria	Bacteroidota	Bacteroidia	Bacteroidales	UBA932	RC9	RC9 sp.	e75d32819d51754169b523e61a0730eb
1	Bacteria	Firmicutes_A	Clostridia	Peptostreptococcales	Peptostreptococcaceae	Paraclostridium	Paraclostridium sordellii/tenue	766223a7ec8105c086b23b1253e6cc43
2	Bacteria	Firmicutes_A	Clostridia	Peptostreptococcales	Peptostreptococcaceae	Clostridioides	Clostridioides difficile/difficile_A/difficile_D	8684679687bdd5cc1e37e1b19d139640
4	Bacteria	Firmicutes_A	Clostridia	Peptostreptococcales	Peptostreptococcaceae	Terrisporobacter	Terrisporobacter othiniensis	259efd17d139ade30145b2e04ba6dd41
4	Bacteria	Firmicutes_A	Clostridia	Peptostreptococcales	Peptostreptococcaceae	Terrisporobacter	Terrisporobacter sp902363255	26c7825c9b112306d7cb81260345a6b0
4	Bacteria	Firmicutes_A	Clostridia	Peptostreptococcales	Peptostreptococcaceae	Terrisporobacter	Terrisporobacter sp.	9bda94872a8ca81bab4e55c1567cd197
1	Bacteria	Firmicutes_A	Clostridia	Peptostreptococcales	Peptostreptococcaceae	Peptostreptococcus	Peptostreptococcus sp.	ff1634302fd2f50cc6dc45decb3acafa
1	Bacteria	Firmicutes_A	Clostridia	Peptostreptococcales	Peptostreptococcaceae	Peptostreptococcus	Peptostreptococcus sp.2	2da31a612263abe690093492bbf6fbda
3	Bacteria	Firmicutes_A	Clostridia	Peptostreptococcales	Peptostreptococcaceae	Intestinibacter	Intestinibacter bartlettii	b6b383eaf9e218d178a7ea40745ebabb
1	Bacteria	Firmicutes_A	Clostridia	Peptostreptococcales	Peptostreptococcaceae	Romboutsia	Romboutsia sp.	c0db821b94c7ac9eecc8b8252ddb49d7
4	Bacteria	Firmicutes_A	Clostridia	Peptostreptococcales	Peptostreptococcaceae	Romboutsia	Romboutsia sp900545985/timonensis	074021b830f8075617b76c0d4aa0b863
1	Bacteria	Firmicutes_A	Clostridia	Peptostreptococcales	Peptostreptococcaceae	Romboutsia	Romboutsia sp.2	af86d81cb867103a4a1b455acb4e30e6
1	Bacteria	Firmicutes_A	Clostridia	Peptostreptococcales	Peptostreptococcaceae	Romboutsia_A	Romboutsia_A dakarensis/hominis_A/sp902362365/weinsteinii	59edac319b901da207ccca15fa602dfc
1	Bacteria	Firmicutes_A	Clostridia	Peptostreptococcales	Peptostreptococcaceae	Romboutsia	Romboutsia sp.3	2024b6fa607e18568d5097f587ede821
4	Bacteria	Firmicutes_A	Clostridia	Peptostreptococcales	Anaerovoracaceae	Family_Anaerovoracaceae	Family_Anaerovoracaceae	a7d38df4ced0c6836251e7046f397e08
4	Bacteria	Firmicutes_A	Clostridia	Peptostreptococcales	Anaerovoracaceae	BX12	BX12 sp014333425	10a6f1744482c9cbe4b00a9eecfe8661
4	Bacteria	Firmicutes_A	Clostridia	Peptostreptococcales	Anaerovoracaceae	UBA1191	UBA1191 sp.	57abeff0cbe452e79c0b7ea4e783fbe9
4	Bacteria	Firmicutes_A	Clostridia	Peptostreptococcales	Anaerovoracaceae	UBA1191	UBA1191 sp900066305	1db3ad614bbb7f6829b182b0684af3d2
1	Bacteria	Firmicutes_A	Clostridia	Peptostreptococcales	Anaerovoracaceae	UBA1191	UBA1191 sp900545775	6769d8f88186211c12eb470796da0ece
4	Bacteria	Firmicutes_A	Clostridia	Peptostreptococcales	Anaerovoracaceae	UBA1191	UBA1191 sp900549125	d5aeb0d5936c22ca3b00e1df1ede21d2
4	Bacteria	Firmicutes_A	Clostridia	Peptostreptococcales	Anaerovoracaceae	CAG-238	CAG-238 sp900542245	03583394f8abfd9df3f88db26712e187
4	Bacteria	Firmicutes_A	Clostridia	Peptostreptococcales	Anaerovoracaceae	Emergencia	Emergencia sp.	a4f347d34ca00d749c3eb0855b455b17
4	Bacteria	Firmicutes_A	Clostridia	Oscillospirales	Ruminococcaceae	CAG-353	CAG-353 sp900066885	7a92d24108b7466a41c3f8915b8e34bb
4	Bacteria	Firmicutes_A	Clostridia	Tissierellales	Peptoniphilaceae	Fenollaria	Fenollaria massiliensis/timonensis	fadbd23abc1df8b9a3dce3204717dad9
1	Bacteria	Firmicutes_A	Clostridia	Clostridiales	Clostridiaceae	Dwaynesavagella	Dwaynesavagella sp.	509b8d6f947eea6bfd6abef7b9096ee7
4	Bacteria	Firmicutes_A	Clostridia_A	Christensenellales	Borkfalkiaceae	UBA10281	UBA10281 sp.	bf682bc41f0bc94d9b45c352ee08c964
1	Bacteria	Firmicutes_A	Clostridia_A	Christensenellales	Order_Christensenellales	Order_Christensenellales	Order_Christensenellales	1a8fe69553d4f92218127d554622ce93
4	Bacteria	Firmicutes_A	Clostridia_A	Christensenellales	Order_Christensenellales	Order_Christensenellales	Order_Christensenellales2	58878741d5383c35137196bbd818f8ee
1	Bacteria	Firmicutes_A	Clostridia	TANB77	CAG-508	UMGS1994	UMGS1994 sp.	eaa7d78527a88d8627d6799492da11fe
1	Bacteria	Bacteroidota	Bacteroidia	Bacteroidales	Rikenellaceae	Alistipes	Alistipes sp.	0c915c3aaf6207a657f1c56667825251
1	Bacteria	Firmicutes_A	Clostridia	TANB77	CAG-508	UMGS1994	UMGS1994 sp.2	e8886c4ac6582189fbbe17e082d11449
4	Bacteria	Firmicutes_A	Clostridia	TANB77	CAG-508	UMGS1994	UMGS1994 sp.3	fe776df9c4c40821114a2d546e7eba6f
1	Bacteria	Firmicutes_A	Clostridia	TANB77	CAG-508	UMGS1994	UMGS1994 sp.4	9f1a59678cd6179a6bb0d6816f9cab3e
1	Bacteria	Firmicutes_A	Clostridia	TANB77	CAG-508	Family_CAG-508	Family_CAG-508	9f75dbdad61e901a222d940ced3c4b71
1	Bacteria	Firmicutes_A	Clostridia	TANB77	CAG-508	Family_CAG-508	Family_CAG-5082	d19f242d587c13702bc1a8679f8c6e7f
1	Bacteria	Firmicutes_A	Clostridia	TANB77	CAG-508	Family_CAG-508	Family_CAG-5083	f125c85a28ed850d1b3efee89c3e1acd
1	Bacteria	Firmicutes_A	Clostridia	TANB77	CAG-508	UMGS1994	UMGS1994 sp.5	28679c39a8960a69032e6c39a28b3634
4	Bacteria	Firmicutes_A	Clostridia	TANB77	CAG-508	UMGS1994	UMGS1994 sp.6	e74aef678ea3f522ea1c45ef1b80a8d3
4	Bacteria	Firmicutes_A	Clostridia	TANB77	CAG-508	UMGS1994	UMGS1994 sp.7	06ccf41162850c7871d20c3ef7e36bdd
1	Bacteria	Firmicutes_A	Clostridia	TANB77	CAG-508	UMGS1994	UMGS1994 sp.8	83529452bbc24701756c5a5a62c65bb9
1	Bacteria	Firmicutes_A	Clostridia	TANB77	CAG-508	UMGS1994	UMGS1994 sp.9	175590ffc415d9a3175d6ef23b7eb9c4
1	Bacteria	Firmicutes_A	Clostridia	TANB77	CAG-508	UMGS1994	UMGS1994 sp.10	23447b1fec8a41843ae877066ffbb85e
1	Bacteria	Firmicutes_A	Clostridia	TANB77	CAG-508	UMGS1994	UMGS1994 sp.11	e7ef14dc14814ba930b27adcb19e8c32
4	Bacteria	Firmicutes_A	Clostridia	TANB77	CAG-508	UMGS1994	UMGS1994 sp.12	888d58ff0b452fbfbebd1bf36a0296dd
1	Bacteria	Firmicutes_A	Clostridia	TANB77	CAG-508	UMGS1994	UMGS1994 sp.13	7354da367b3102f6a15011a8e73e052d
1	Bacteria	Firmicutes_A	Clostridia	TANB77	CAG-508	UMGS1994	UMGS1994 sp.14	6103e69085dd0251e92f33fb7dc00a18
4	Bacteria	Firmicutes_A	Clostridia	TANB77	CAG-508	UMGS1994	UMGS1994 sp.15	9257d9dbece17d3e635843c336ee388d
1	Bacteria	Firmicutes_A	Clostridia	TANB77	CAG-508	UMGS1994	UMGS1994 sp.16	72d735235926bcdebcaaefc656a9c653
1	Bacteria	Firmicutes_A	Clostridia	TANB77	CAG-508	UMGS1994	UMGS1994 sp.17	b5de3e3182215d28c122deb71e550298
4	Bacteria	Firmicutes_A	Clostridia	TANB77	CAG-508	UMGS1994	UMGS1994 sp.18	1b5fd6d05f000a2817a302af29ea14c2
1	Bacteria	Firmicutes_A	Clostridia	TANB77	CAG-508	UMGS1994	UMGS1994 sp.19	27c0d6aba5349779764f1d752e34be9f
1	Bacteria	Firmicutes_A	Clostridia	TANB77	CAG-508	CAG-354	CAG-354 sp.	2847679f15b150083425c0f5fcd8faf8
1	Bacteria	Firmicutes_A	Clostridia	TANB77	CAG-508	CAG-354	CAG-354 sp.2	037a8dab18e4c5ae599b3e9ec6684ae8
1	Bacteria	Firmicutes_A	Clostridia	TANB77	CAG-508	CAG-354	CAG-354 sp900552655	6dbcf153b0182c45e43924e6a0814551
1	Bacteria	Firmicutes_A	Clostridia	TANB77	CAG-508	UMGS1994	UMGS1994 sp.20	10aaf6dd3d44f6f9d5c768123f1a8a32
4	Bacteria	Firmicutes_A	Clostridia	TANB77	CAG-508	UMGS1994	UMGS1994 sp.21	d91411031c789813eae0b02be7d0653c
1	Bacteria	Firmicutes_A	Clostridia	TANB77	CAG-508	UMGS1994	UMGS1994 sp900553945	3304c50e4945204e09506e14a4f0ef59
1	Bacteria	Firmicutes_A	Clostridia	TANB77	CAG-508	UMGS1994	UMGS1994 sp.22	147dec0201bb2b114a3422d8034241b4
4	Bacteria	Firmicutes_A	Clostridia	TANB77	CAG-508	UMGS1994	UMGS1994 sp.23	1052239262eef02d0c581b22a6929a31
1	Bacteria	Firmicutes_A	Clostridia	TANB77	CAG-508	UMGS1994	UMGS1994 sp.24	1228660c74da059a5ecf33f8c0f3cfea
1	Bacteria	Firmicutes_A	Clostridia	TANB77	CAG-508	UMGS1994	UMGS1994 sp.25	ff2af5d2cb645e23827406243c05990a
1	Bacteria	Firmicutes_A	Clostridia	TANB77	CAG-508	UMGS1994	UMGS1994 sp.26	de788077092e5b5f75b04433b21af2d4
4	Bacteria	Firmicutes_A	Clostridia	TANB77	CAG-508	Family_CAG-508	Family_CAG-5084	435a8d197d808058661437617d2d5fb1
4	Bacteria	Firmicutes_A	Clostridia	TANB77	CAG-508	UMGS1994	UMGS1994 sp.27	96fa1270197f9584d2f77caf426f119f
1	Bacteria	Firmicutes_A	Clostridia	TANB77	CAG-508	UMGS1994	UMGS1994 sp.28	81795c3005b593ab0d71dbf72d228f76
2	Bacteria	Firmicutes_A	Clostridia	TANB77	CAG-508	Family_CAG-508	Family_CAG-5085	9d578f022369d3158ab4cb8032599665
4	Bacteria	Firmicutes_A	Clostridia	TANB77	CAG-508	CAG-354	CAG-354 sp.3	e6cb731fc8e419092198f32817e67323
1	Bacteria	Firmicutes_A	Clostridia	TANB77	CAG-508	Family_CAG-508	Family_CAG-5086	9df4e537e02c0c7de257fac55d907cbf
1	Bacteria	Firmicutes_A	Clostridia	TANB77	CAG-508	Family_CAG-508	Family_CAG-5087	8cbca23ce43bf5ce4c8fb9deb2d84cec
4	Bacteria	Firmicutes_A	Clostridia	TANB77	CAG-508	UMGS1994	UMGS1994 sp.29	4f2dd93d7f2a712852df39366d4f795b
4	Bacteria	Firmicutes_A	Clostridia	TANB77	CAG-508	UMGS1994	UMGS1994 sp.30	ef260636164d1414f4edb18e397f9a24
4	Bacteria	Firmicutes_A	Clostridia	TANB77	CAG-508	UMGS1994	UMGS1994 sp.31	1364d978b301eaa5f75a7273c4f7bfd8
4	Bacteria	Firmicutes_A	Clostridia	TANB77	CAG-508	UMGS1781	UMGS1781 sp.	92f620f653f9d1cf1f236f25793c298c
1	Bacteria	Firmicutes_A	Clostridia	TANB77	CAG-508	UMGS1781	UMGS1781 sp.2	af7cfe5406f692c52f868481fd8711f8
1	Bacteria	Firmicutes_A	Clostridia	TANB77	CAG-508	UMGS1994	UMGS1994 sp.32	d53dd6f90f76aeabce6ea6602486b9e1
1	Bacteria	Firmicutes_A	Clostridia	TANB77	CAG-508	UMGS1994	UMGS1994 sp.33	76fc49edd9c58fd2c1add2feded4d3e8
1	Bacteria	Firmicutes_A	Clostridia	TANB77	CAG-508	UMGS1994	UMGS1994 sp.34	81331f9adaa5bc588aab0439ad1f3ddc
4	Bacteria	Firmicutes_A	Clostridia	TANB77	CAG-508	UMGS1994	UMGS1994 sp.35	1278654631015edf3604cb0d6005ed0d
1	Bacteria	Firmicutes_A	Clostridia	Tissierellales	Peptoniphilaceae	Ezakiella	Ezakiella coagulans/sp900540185	fc044ae63bc17d3250f6bcffa9de09da
1	Bacteria	Firmicutes_A	Clostridia	Tissierellales	Peptoniphilaceae	Anaerococcus	Anaerococcus octavius	3d8a90a1d264c4a7dd0a037eefeb932e
1	Bacteria	Firmicutes_A	Clostridia	Tissierellales	Peptoniphilaceae	Anaerococcus	Anaerococcus vaginalis	efe2ef829cdc0a2cf36f8c27f96678d7
1	Bacteria	Firmicutes_A	Clostridia	Tissierellales	Peptoniphilaceae	Finegoldia	Finegoldia magna/magna_F/magna_H	71583d4d24337e9399790e6512194ba6
1	Bacteria	Firmicutes_A	Clostridia	Tissierellales	Peptoniphilaceae	Miniphocibacter	Miniphocibacter sp.	097d41c3b31e409fcb8cc5c06fdb39b8
1	Bacteria	Firmicutes_A	Clostridia	Tissierellales	Peptoniphilaceae	Peptoniphilus_A	Peptoniphilus_A harei/lacydonensis/phoceensis/senegalensis/sp900538655	95b523dacb244bb891da4c48923d8788
4	Bacteria	Firmicutes_A	Clostridia	Tissierellales	Peptoniphilaceae	Peptoniphilus_B	Peptoniphilus_B duerdenii	fbc85b36d0eaadf42b9ce6df4943cd1e
1	Bacteria	Firmicutes_A	Clostridia	Saccharofermentanales	DTU023	SFGY01	SFGY01 callanderi/limosum/sp004556455	e131010b5b3301d31d325eef20a8c155
1	Bacteria	Firmicutes_B	Phylum_Firmicutes_B	Phylum_Firmicutes_B	Phylum_Firmicutes_B	Phylum_Firmicutes_B	Phylum_Firmicutes_B	be00df3308324ce8385feb9554169517
1	Bacteria	Firmicutes_A	Clostridia_A	Christensenellales	CAG-74	UBA11524	UBA11524 sp.	53c4da6ea6da771729c69439a6d156d2
1	Bacteria	Firmicutes_A	Clostridia_A	Christensenellales	CAG-74	UBA11524	UBA11524 sp.2	e0f4cfa798c2bea13e1f1a432dbf2ea7
1	Bacteria	Bacteroidota	Bacteroidia	Bacteroidales	Bacteroidaceae	Prevotellamassilia	Prevotellamassilia sp004558535	a21d6a896ea600ece9526c2a2abeedb8
4	Bacteria	Firmicutes_A	Clostridia_A	Christensenellales	CAG-74	OEMS01	OEMS01 sp.	75f350b3276be83e60ebe2c1129ec74f
1	Bacteria	Firmicutes_A	Clostridia_A	Christensenellales	CAG-74	OEMS01	OEMS01 sp.2	391bb2b911d99da6d1b49ac84162f217
4	Bacteria	Firmicutes_A	Clostridia_A	Christensenellales	CAG-74	OEMS01	OEMS01 sp.3	f6eb8494fd6d23ef778c0b679986cf8d
4	Bacteria	Firmicutes_A	Clostridia_A	Christensenellales	CAG-74	Firm-11	Firm-11 sp.	cb7c7da0daa5c0d723fd56a669929399
1	Bacteria	Firmicutes_A	Clostridia_A	Christensenellales	CAG-74	HGM11604	HGM11604 sp.	ded0cd0ad0c1ea44fb2b9f2fbdd28585
1	Bacteria	Firmicutes_A	Clostridia_A	Christensenellales	CAG-74	HGM11604	HGM11604 sp.2	10b28326811e257287ef9eef4867720f
1	Bacteria	Firmicutes_A	Clostridia_A	Christensenellales	CAG-74	HGM11604	HGM11604 sp.3	9dd563e9fd413f0fe9fe45659d83307d
4	Bacteria	Firmicutes_A	Clostridia_A	Christensenellales	CAG-74	HGM11604	HGM11604 sp.4	89330b743b4c267ca5b2dca61471554f
4	Bacteria	Firmicutes_A	Clostridia_A	Christensenellales	CAG-74	UBA11524	UBA11524 sp.3	093841f4838909e80d5de5a4b256e89d
1	Bacteria	Firmicutes_C	Negativicutes	Acidaminococcales	Acidaminococcaceae	Acidaminococcus	Acidaminococcus intestini	ef4ea7c24f1dd56b9d694a84690a054f
1	Bacteria	Firmicutes_C	Negativicutes	Acidaminococcales	Acidaminococcaceae	Phascolarctobacterium_A	Phascolarctobacterium_A sp.	3c3fbfb488ba52ac2307ed715091fa1a
4	Bacteria	Firmicutes_C	Negativicutes	Acidaminococcales	Acidaminococcaceae	Phascolarctobacterium_A	Phascolarctobacterium_A sp900544885/succinatutens	32f1a5ebac1fd78f3e3ba08e7e69ae22
1	Bacteria	Firmicutes_C	Negativicutes	Acidaminococcales	Acidaminococcaceae	Phascolarctobacterium_A	Phascolarctobacterium_A sp.2	ca402b1e40d8817cbb77549e505be8a1
1	Bacteria	Bacteroidota	Bacteroidia	Bacteroidales	Bacteroidaceae	Paraprevotella	Paraprevotella sp.	6835fc72e51ae7d5d39308a578651f17
3	Bacteria	Bacteroidota	Bacteroidia	Bacteroidales	Bacteroidaceae	Paraprevotella	Paraprevotella faecium/sp900760455	2dc26dda3a7735af9bf29c6bc37c2ecc
1	Bacteria	Firmicutes_C	Negativicutes	Acidaminococcales	Acidaminococcaceae	Succiniclasticum	Succiniclasticum sp.	1b7c33c581315c32f53d8ef1545862ce
1	Bacteria	Firmicutes_C	Negativicutes	Acidaminococcales	Acidaminococcaceae	Phascolarctobacterium	Phascolarctobacterium sp.	efcc13f20a077a53f6ad65ded9dd2421
1	Bacteria	Firmicutes	Bacilli	ML615J-28	CAG-313	CAG-313	CAG-313 sp.	626767bfb2a1a8715bb2e1ddf7c3dd81
4	Bacteria	Firmicutes	Bacilli	ML615J-28	CAG-313	CAG-313	CAG-313 sp003539625	feb5d44a46102adef58bc8119e857035
4	Bacteria	Firmicutes	Bacilli	Haloplasmatales_A	Turicibacteraceae	Turicibacter	Turicibacter sanguinis	344d8b43649398b27815ced26ea5bf9c
4	Bacteria	Firmicutes	Bacilli	Haloplasmatales_A	Turicibacteraceae	Turicibacter	Turicibacter sp001543345	e0d214a60c3baff72cd75100c6e4cc28
1	Bacteria	Firmicutes	Bacilli	Bacillales	Bacillaceae_G	Bacillus_A	Bacillus_A albus/bingmayongensis/bombysepticus/cereus/cereus_AG/cereus_AK/cereus_AQ/cereus_AT/cereus_AU/cereus_AV/cereus_AW/cereus_AZ/cereus_K/cereus_O/cereus_S/defluvii/fungorum/gaemokensis/lactosutens_A/luti/microflavus/mobilis/mycoides/mycoides_A/mycoides_B/mycoides_C/nitratireducens/paramycoides/paranthracis/proteolyticus/pseudomycoides/pseudomycoides_C/quinghaiensis/sp001683825/sp002551815/s…	3fbdc2869efba5e5a4105a6eb0fae017
1	Bacteria	Firmicutes	Bacilli	Lactobacillales	Enterococcaceae	Family_Enterococcaceae	Family_Enterococcaceae	b6a1675fa3f43bec37b92541779954a1
1	Bacteria	Firmicutes	Bacilli	Lactobacillales	Enterococcaceae	Family_Enterococcaceae	Family_Enterococcaceae2	feca18ade6df94796d50a78934c4cb9e
1	Bacteria	Firmicutes	Bacilli	Lactobacillales	Enterococcaceae	Family_Enterococcaceae	Family_Enterococcaceae3	66ab40a14009199b179c609d1518add6
2	Bacteria	Firmicutes	Bacilli	Lactobacillales	Aerococcaceae	Granulicatella	Granulicatella adiacens/sp001058355/sp001071995	811de0fe9b0d5e4574555aae5778bb2d
2	Bacteria	Firmicutes	Bacilli	Lactobacillales	Enterococcaceae	Enterococcus_A	Enterococcus_A avium/florum/gilvus/hermanniensis/malodoratus/pallens/pseudoavium/raffinosus/sp005405205/viikkiensis/xiangfangensis	c1db7522db15f60f21f243b58df63f16
1	Bacteria	Firmicutes	Bacilli	Lactobacillales	Listeriaceae	Listeria	Listeria coralli/innocua/ivanovii/londoniensis/monocytogenes/monocytogenes_B/monocytogenes_C/seeligeri/sp014223685/sp014227775/sp014229095/sp014229345/sp014229645/welshimeri	1954f22b2b57c2546fcc31c6c6037d5d
1	Bacteria	Firmicutes	Bacilli	Class_Bacilli	Class_Bacilli	Class_Bacilli	Class_Bacilli	383d611163528d91b17618a6382b5e04
1	Bacteria	Firmicutes	Bacilli	Lactobacillales	Lactobacillaceae	Lactiplantibacillus	Lactiplantibacillus fabifermentans/paraplantarum/pentosus/plantarum/plantarum_A/sp005404945	4bba51be27489ec583687e644a130bc4
1	Bacteria	Firmicutes	Bacilli	Lactobacillales	Lactobacillaceae	Lacticaseibacillus	Lacticaseibacillus sp.	cf88a56a651c432c93706b6fb7dc5486
1	Bacteria	Firmicutes	Bacilli	Lactobacillales	Lactobacillaceae	Lacticaseibacillus	Lacticaseibacillus sp.2	0250d5a5ec9b4cf56dc5f52098d7038a
1	Bacteria	Firmicutes	Bacilli	Lactobacillales	Lactobacillaceae	Lacticaseibacillus	Lacticaseibacillus rhamnosus	64a0d1186d3ac531e47fef6e95c2b4bc
1	Bacteria	Firmicutes	Bacilli	Lactobacillales	Lactobacillaceae	Lacticaseibacillus	Lacticaseibacillus sp.3	46fd91ce6789a30a1f59450e07fc7895
1	Bacteria	Firmicutes	Bacilli	Lactobacillales	Lactobacillaceae	Lacticaseibacillus	Lacticaseibacillus sp.4	16b5db327cd82268383ed62689902eac
1	Bacteria	Firmicutes	Bacilli	Lactobacillales	Lactobacillaceae	Lacticaseibacillus	Lacticaseibacillus casei/chiayiensis/paracasei/zeae	ccc3cce7144df93b827dc9a9fd18dfaf
1	Bacteria	Firmicutes	Bacilli	Lactobacillales	Lactobacillaceae	Lacticaseibacillus	Lacticaseibacillus sp.5	48fde95a9f32e88d9869ead8a517bccd
1	Bacteria	Firmicutes	Bacilli	Lactobacillales	Lactobacillaceae	Lacticaseibacillus	Lacticaseibacillus sp.6	61086a80a0a0fda5a062965ce5dd6fef
1	Bacteria	Firmicutes	Bacilli	Lactobacillales	Lactobacillaceae	Companilactobacillus	Companilactobacillus crustorum/farciminis/farciminis_A/formosensis/halodurans/heilongjiangensis/kimchiensis/mindensis/musae/nantensis/nuruki/paralimentarius/paralimentarius_A/paralimentarius_B/sp005404815/zhachilii	d128f2f679c5eb92cff2b205af57f6b2
1	Bacteria	Firmicutes	Bacilli	Lactobacillales	Lactobacillaceae	Pediococcus	Pediococcus acidilactici/acidilactici_A/claussenii	e8239856c52d9a7a6fa35a6afc4accc0
1	Bacteria	Firmicutes	Bacilli	Lactobacillales	Lactobacillaceae	Pediococcus	Pediococcus pentosaceus/stilesii	43d583a165ce6aa7ada8c30439e7bf77
4	Bacteria	Firmicutes	Bacilli	Lactobacillales	Lactobacillaceae	Latilactobacillus	Latilactobacillus curvatus/sakei/sakei_A	2b558c90de00f0e77bb013076aea9f83
1	Bacteria	Firmicutes	Bacilli	Lactobacillales	Lactobacillaceae	Limosilactobacillus	Limosilactobacillus sp.	a6371a7bf2f895478ebeba8ca14c5bf3
1	Bacteria	Firmicutes	Bacilli	Lactobacillales	Lactobacillaceae	Limosilactobacillus	Limosilactobacillus fermentum	11d9c9ed1d2d58a9cb0bbcdc93aa3e55
1	Bacteria	Firmicutes	Bacilli	Lactobacillales	Lactobacillaceae	Limosilactobacillus	Limosilactobacillus mucosae	ec908e2f3d58cd8d5a89d690c501f383
1	Bacteria	Firmicutes	Bacilli	Lactobacillales	Lactobacillaceae	Ligilactobacillus	Ligilactobacillus salivarius	09872a070b7533a881967d52b487c717
1	Bacteria	Firmicutes	Bacilli	Lactobacillales	Lactobacillaceae	Ligilactobacillus	Ligilactobacillus sp.	f66731a0127e5d6502829b14ed429610
1	Bacteria	Firmicutes	Bacilli	Lactobacillales	Lactobacillaceae	Ligilactobacillus	Ligilactobacillus ruminis	ca5152dd2313e7fe7d25872f10c57f6d
1	Bacteria	Firmicutes	Bacilli	Lactobacillales	Lactobacillaceae	Ligilactobacillus	Ligilactobacillus agilis	f876c59c3b7f5c110a84002161849418
1	Bacteria	Firmicutes	Bacilli	Lactobacillales	Lactobacillaceae	Limosilactobacillus	Limosilactobacillus vaginalis	11df5dece1ac7fa68852aae2cface58c
1	Bacteria	Firmicutes	Bacilli	Lactobacillales	Lactobacillaceae	Limosilactobacillus	Limosilactobacillus sp.2	64aba11b69f45504b0eb65af6306b54f
1	Bacteria	Firmicutes	Bacilli	Lactobacillales	Lactobacillaceae	Limosilactobacillus	Limosilactobacillus antri/frumenti/oris/panis/reuteri/reuteri_D/reuteri_E/sp014145435/sp014145545/sp014145615/sp900156885/vaginalis_A	e84f9273d6c704acd4cd20b3af264d4b
1	Bacteria	Firmicutes	Bacilli	Lactobacillales	Lactobacillaceae	Lactobacillus	Lactobacillus sp.	92388ed7c66b9d5bbb8a6b53e3809e04
1	Bacteria	Firmicutes	Bacilli	Lactobacillales	Lactobacillaceae	Lactobacillus	Lactobacillus gasseri/hominis/johnsonii/paragasseri/taiwanensis	44d9fc4de8898b6c82c69654435a9f0b
1	Bacteria	Firmicutes	Bacilli	Lactobacillales	Lactobacillaceae	Lactobacillus	Lactobacillus sp.2	a6f677e1060e5af6c65d29a38cbff740
2	Bacteria	Firmicutes	Bacilli	Lactobacillales	Lactobacillaceae	Lactobacillus	Lactobacillus iners	dbb3a9c3f8c94e2d5e68abf292c02dba
2	Bacteria	Firmicutes	Bacilli	Lactobacillales	Lactobacillaceae	Lactobacillus	Lactobacillus acidophilus/crispatus/gallinarum	461839ef076a556fe1791e2de0faf2ef
1	Bacteria	Firmicutes	Bacilli	Lactobacillales	Lactobacillaceae	Lactobacillus	Lactobacillus kitasatonis	5d4ad1de8cd1f91aae0684081da6b043
1	Bacteria	Firmicutes	Bacilli	Lactobacillales	Lactobacillaceae	Lactobacillus	Lactobacillus amylovorus/ultunensis	2e1e0e82ef86479ac48df33a5357bcbf
1	Bacteria	Firmicutes	Bacilli	Lactobacillales	Lactobacillaceae	Lactobacillus	Lactobacillus jensenii/mulieris	19e28f1d710bf21e4204982e643fcca2
1	Bacteria	Firmicutes	Bacilli	Staphylococcales	Gemellaceae	Gemella	Gemella haemolysans/haemolysans_A/haemolysans_B/morbillorum/sp002871655/sp004570485	daef7fbdc4bc9f2aef3e4ba4d46688d5
4	Bacteria	Firmicutes	Bacilli	Acholeplasmatales	Anaeroplasmataceae	CAG-307	CAG-307 sp900547045	f86fb5732aba9aa935a3f0800e19d469
1	Bacteria	Firmicutes	Bacilli	Erysipelotrichales	Erysipelotrichaceae	Holdemanella	Holdemanella sp.	af5a6f3f5bf1a1024372cc53d219f01d
1	Bacteria	Firmicutes	Bacilli	Erysipelotrichales	Erysipelotrichaceae	Holdemanella	Holdemanella sp002299315/sp003458715	49a63cb5bc191e52bc6e633c2ddaed81
1	Bacteria	Firmicutes	Bacilli	Erysipelotrichales	Erysipelotrichaceae	Holdemanella	Holdemanella biformis	e279ebf714935f3f24954a28495f1fba
2	Bacteria	Firmicutes	Bacilli	Erysipelotrichales	Erysipelotrichaceae	Clostridium_AQ	Clostridium_AQ innocuum/sp900755895	63e8c56459a970855ac850a816a0f5b9
1	Bacteria	Firmicutes	Bacilli	Lactobacillales	Streptococcaceae	Streptococcus	Streptococcus porcinus/porcinus_A/uberis	afd04b5c308b7aed31960646eea091cb
1	Bacteria	Firmicutes	Bacilli	Lactobacillales	Streptococcaceae	Streptococcus	Streptococcus sp000187445	02b6047d37c9a620c2f319960212623d
1	Bacteria	Firmicutes	Bacilli	Lactobacillales	Streptococcaceae	Streptococcus	Streptococcus prausnitzii_F/salivarius/sp001556435/thermophilus/vestibularis	aa20f3a40eaf07050443d2555f000f97
1	Bacteria	Firmicutes	Bacilli	Lactobacillales	Streptococcaceae	Streptococcus	Streptococcus sp.	f586dc44405e19844f226b9295848073
1	Bacteria	Firmicutes	Bacilli	Lactobacillales	Streptococcaceae	Streptococcus	Streptococcus sp.2	bffefec5f799dd77e162fb0dbbe87dce
1	Bacteria	Firmicutes	Bacilli	Lactobacillales	Streptococcaceae	Streptococcus	Streptococcus uberis_A	7e0e630fefa414dfc7b818c79a835349
1	Bacteria	Firmicutes	Bacilli	Lactobacillales	Streptococcaceae	Streptococcus	Streptococcus anginosus/anginosus_C	52209cdee45b0881738eea08aa562b05
1	Bacteria	Firmicutes	Bacilli	Lactobacillales	Streptococcaceae	Streptococcus	Streptococcus sp.3	27b9b2a1c83402ddbd27241a5ca5e9e0
1	Bacteria	Firmicutes	Bacilli	Lactobacillales	Streptococcaceae	Streptococcus	Streptococcus urinalis	8ed4fe5fb86c3eb2df4b057dee108306
1	Bacteria	Firmicutes	Bacilli	Lactobacillales	Streptococcaceae	Streptococcus	Streptococcus sp.4	30882ac6f14a138f5302f7ec4379e887
1	Bacteria	Firmicutes	Bacilli	Lactobacillales	Streptococcaceae	Streptococcus	Streptococcus alactolyticus/gallolyticus/macedonicus/pasteurianus	3624c706ccc316c43ace43767a8340f7
1	Bacteria	Firmicutes	Bacilli	Lactobacillales	Streptococcaceae	Streptococcus	Streptococcus equinus/equinus_D/infantarius/lutetiensis/sp002393675	f221d850bc84e6362d4d84292d95eb0d
1	Bacteria	Firmicutes	Bacilli	Lactobacillales	Streptococcaceae	Streptococcus	Streptococcus agalactiae	f1a143b32b57cf1c09456885687780f4
1	Bacteria	Firmicutes	Bacilli	Lactobacillales	Streptococcaceae	Streptococcus	Streptococcus sp.5	cd9969d90231667ffc117aa74d9e39db
1	Bacteria	Firmicutes	Bacilli	Lactobacillales	Streptococcaceae	Streptococcus	Streptococcus australis_A/chosunense/dentisani/gwangjuense/halitosis/infantis/infantis_E/infantis_F/infantis_G/infantis_H/infantis_I/mitis/mitis_A/mitis_AC/mitis_AD/mitis_AF/mitis_AH/mitis_AI/mitis_AK/mitis_AP/mitis_AQ/mitis_AR/mitis_AT/mitis_AV/mitis_AW/mitis_AX/mitis_AY/mitis_AZ/mitis_BA/mitis_BB/mitis_BC/mitis_BD/mitis_BE/mitis_BG/mitis_BH/mitis_BI/mitis_BJ/mitis_BK/mitis_BM/mitis_BN/mitis_BO/…	dca3a793a5b446cb1b22e8920013f081
1	Bacteria	Firmicutes	Bacilli	Lactobacillales	Streptococcaceae	Streptococcus	Streptococcus pneumoniae/pseudopneumoniae	1e8f827acf20b3a54137cc311289d5d4
1	Bacteria	Firmicutes	Bacilli	Lactobacillales	Streptococcaceae	Streptococcus	Streptococcus infantis_C/peroris/sp000411475/sp004166885/sp900543065/sp902363395	4306624aac1764786c4e4fdf89c060a3
1	Bacteria	Firmicutes	Bacilli	Lactobacillales	Streptococcaceae	Streptococcus	Streptococcus australis/koreensis/parasanguinis/parasanguinis_A/parasanguinis_B/parasanguinis_C/parasanguinis_D/rubneri/sp000314795/sp001587175	f6d015a5eb0f94fb78aefd33ad5b023e
1	Bacteria	Firmicutes	Bacilli	Lactobacillales	Streptococcaceae	Streptococcus	Streptococcus mutans	a434ae5f3c2225268b29114aef573786
1	Bacteria	Firmicutes	Bacilli	Erysipelotrichales	Erysipelatoclostridiaceae	Catenibacterium	Catenibacterium mitsuokai/sp000437715	5593400479400c2428b9292448d8b42c
1	Bacteria	Firmicutes	Bacilli	Erysipelotrichales	Erysipelatoclostridiaceae	Catenibacterium	Catenibacterium sp.	a8de4a9296264d0a4cd96b988c96d746
2	Bacteria	Firmicutes	Bacilli	Erysipelotrichales	Erysipelatoclostridiaceae	Longibaculum	Longibaculum sp900538465	3eca482f4633f76cbfd8e05695a39849
4	Bacteria	Firmicutes	Bacilli	Erysipelotrichales	Erysipelatoclostridiaceae	Faecalibacillus	Faecalibacillus faecis/intestinalis/sp900762515	b266328eb7ff55925df2dfa204ecb040
1	Bacteria	Firmicutes	Bacilli	Erysipelotrichales	Erysipelatoclostridiaceae	Erysipelatoclostridium	Erysipelatoclostridium sp.	59f52593f11b2b6a4950dc8c15f384ea
2	Bacteria	Firmicutes	Bacilli	Erysipelotrichales	Erysipelatoclostridiaceae	Erysipelatoclostridium	Erysipelatoclostridium ramosum	87c2912f70537a375ec52d2e37479534
4	Bacteria	Firmicutes	Bacilli	Erysipelotrichales	Erysipelatoclostridiaceae	Erysipelatoclostridium	Erysipelatoclostridium saccharogumia/sp000508865	fce32a3a6161111919579b90afe5d8fd
2	Bacteria	Firmicutes	Bacilli	Erysipelotrichales	Erysipelatoclostridiaceae	Erysipelatoclostridium	Erysipelatoclostridium sp.2	e272bb5982444eac959b7979d57c3ac3
1	Bacteria	Firmicutes_A	Clostridia	Oscillospirales	Oscillospiraceae	NK3B98	NK3B98 sp.	c444b2ac6da623df8bf9b73eb96f9eda
1	Bacteria	Firmicutes_A	Clostridia	Clostridiales	Clostridiaceae	Clostridium	Clostridium sp.	8d3101a0e6ba3c5add19b88d8c11d252
1	Bacteria	Firmicutes_A	Clostridia	Clostridiales	Clostridiaceae	Clostridium	Clostridium baratii/sp000498355	7f953d9397a2434aac502ec514487262
1	Bacteria	Firmicutes_A	Clostridia	Clostridiales	Clostridiaceae	Clostridium	Clostridium sp.2	ff0a475872bfad8e63d312bf05b979de
1	Bacteria	Firmicutes_A	Clostridia	Clostridiales	Clostridiaceae	Clostridium	Clostridium sp.3	d9f3b25f854d882382762ee9ac49b4b2
1	Bacteria	Firmicutes_A	Clostridia	Clostridiales	Clostridiaceae	Clostridium	Clostridium sp.4	71ba37d91549a10c8e8d58f0c4707a0f
1	Bacteria	Firmicutes_A	Clostridia	Clostridiales	Clostridiaceae	Clostridium	Clostridium sp.5	1c78f978fdfacdcaae39693a1b98dd16
1	Bacteria	Firmicutes_A	Clostridia	Clostridiales	Clostridiaceae	Clostridium	Clostridium paraputrificum	8bc5f91e73cb8289af4fb59f021386ab
1	Bacteria	Firmicutes_A	Clostridia	Clostridiales	Clostridiaceae	Clostridium	Clostridium sp.6	373d407d2bf30e822e7627284a464d0e
1	Bacteria	Firmicutes_A	Clostridia	Clostridiales	Clostridiaceae	Clostridium	Clostridium sp.7	2108338f56e07ad2b24a4e7354a0ea7f
4	Bacteria	Firmicutes_A	Clostridia	Clostridiales	Clostridiaceae	Clostridium	Clostridium sp.8	f7fd8c237e08256a863ad4ffc6642c62
1	Bacteria	Firmicutes_A	Clostridia	Clostridiales	Clostridiaceae	Clostridium	Clostridium sp.9	6e3d2010b7a2ab40758c1dcd0fa0eb01
1	Bacteria	Firmicutes_A	Clostridia	Clostridiales	Clostridiaceae	Clostridium	Clostridium sp.10	bd3d2456507b36187e5a6695e95f0c5f
1	Bacteria	Firmicutes_A	Clostridia	Clostridiales	Clostridiaceae	Clostridium	Clostridium beijerinckii/puniceum/saccharoperbutylacetonicum/sp000230835/sp002760435/sp009928485	df72200519d9722883fced9b7a2569f9
1	Bacteria	Firmicutes_A	Clostridia	Clostridiales	Clostridiaceae	Clostridium	Clostridium sp.11	263f680815199326f7ddce45b54ecf7f
1	Bacteria	Firmicutes_A	Clostridia	Clostridiales	Clostridiaceae	Clostridium	Clostridium neonatale	03a722bba911de891254934069dc8959
1	Bacteria	Firmicutes_A	Clostridia	Clostridiales	Clostridiaceae	Clostridium	Clostridium sp.12	fa9a2e1535096a94961eff6717a2f9cc
1	Bacteria	Firmicutes_A	Clostridia	Clostridiales	Clostridiaceae	Clostridium	Clostridium butyricum/sp012843905	ed9bda39c478ed0c67b6b3cabeff117f
1	Bacteria	Firmicutes_A	Clostridia	Clostridiales	Clostridiaceae	Clostridium_P	Clostridium_P sp.	934444056e896b550d9c8abe944d0142
1	Bacteria	Firmicutes_A	Clostridia	Clostridiales	Clostridiaceae	Clostridium_P	Clostridium_P sp.2	f38996f4570cc50b2c5c017248157b5f
1	Bacteria	Firmicutes_A	Clostridia	Clostridiales	Clostridiaceae	Clostridium_P	Clostridium_P sp.3	f372cc03cc4021596743435b40c744e6
1	Bacteria	Firmicutes_A	Clostridia	Clostridiales	Clostridiaceae	Clostridium_P	Clostridium_P sp.4	8bb79529569e65e1775d1f51d940e1f4
1	Bacteria	Firmicutes_A	Clostridia	Clostridiales	Clostridiaceae	Clostridium_P	Clostridium_P sp.5	800ede164f99f425f1127389418ea7df
1	Bacteria	Firmicutes_A	Clostridia	Clostridiales	Clostridiaceae	Clostridium_P	Clostridium_P perfringens	dc85940d84ddbd7315db16b14390cb8d
1	Bacteria	Firmicutes_A	Clostridia	Clostridiales	Clostridiaceae	Clostridium_P	Clostridium_P sp.6	26e4b18c87c82cc4767bb4e94736f244
1	Bacteria	Firmicutes_A	Clostridia	Clostridiales	Clostridiaceae	Clostridium_P	Clostridium_P massiliamazoniense	a10b1616206e98f58d440c54d7647f26
1	Bacteria	Firmicutes_A	Clostridia	Clostridiales	Clostridiaceae	Clostridium_P	Clostridium_P sp.7	fe0590d05624ad20b5ec4214fd2619a2
1	Bacteria	Firmicutes_A	Clostridia	Clostridiales	Clostridiaceae	Clostridium_P	Clostridium_P sp.8	3b65e270c7035658a8a86edaa0edf9c9
1	Bacteria	Firmicutes_A	Clostridia	Clostridiales	Clostridiaceae	Clostridium_P	Clostridium_P sp.9	9dece060ffcff93473a7023dcee0defd
1	Bacteria	Firmicutes_A	Clostridia	Clostridiales	Clostridiaceae	Clostridium_P	Clostridium_P sp.10	d5a04a8528de300836ef14cf4ad3fda4
1	Bacteria	Firmicutes_A	Clostridia	Clostridiales	Clostridiaceae	Clostridium	Clostridium sp.13	bd409c3df3df33cf1f9d7bb00f5a9950
2	Bacteria	Firmicutes_A	Clostridia	Clostridiales	Clostridiaceae	Clostridium	Clostridium sartagoforme_B	81914609a0b3cb22c5e45e2d26f8b9d1
1	Bacteria	Firmicutes_A	Clostridia	Clostridiales	Clostridiaceae	Clostridium	Clostridium sartagoforme_A/tertium	b4a9dfc4ecfd90d523c651948c395cd5
4	Bacteria	Firmicutes_A	Clostridia_A	Christensenellales	Christensenellaceae	NSJ-63	NSJ-63 sp.	14699fef4c362b55f6abbbc496926d7c
1	Bacteria	Firmicutes_A	Clostridia_A	Christensenellales	Christensenellaceae	NSJ-63	NSJ-63 sp.2	a46f25b5fd017c02bd77db2a51931bfe
4	Bacteria	Firmicutes_A	Clostridia_A	Christensenellales	Christensenellaceae	NSJ-63	NSJ-63 sp.3	2fc391e8a2b240b2d5716629e061af95
4	Bacteria	Firmicutes_A	Clostridia	Oscillospirales	UBA644	UBA644	UBA644 sp.	3f5229cf508ac4a4547effcc70883223
4	Bacteria	Firmicutes_A	Clostridia_A	Christensenellales	CAG-138	RUG472	RUG472 sp.	f8e450d54621ccb79e4aa6a67ca63450
4	Bacteria	Firmicutes_A	Clostridia_A	Christensenellales	CAG-138	Phil1	Phil1 sp.	be383cf3be58d0c7cb7f9d1375af1abf
1	Bacteria	Firmicutes_A	Clostridia_A	Christensenellales	CAG-138	UBA3792	UBA3792 sp.	fc9acb238de7602fba6fd96935ac2da3
4	Bacteria	Firmicutes_A	Clostridia_A	Christensenellales	CAG-138	Phil1	Phil1 sp.2	ea5f52d80ca22c6b84d0ee138fb64fbc
4	Bacteria	Firmicutes_A	Clostridia_A	Christensenellales	CAG-138	PeH17	PeH17 sp.	f70e40d40aefda7616bba04bbe141163
4	Bacteria	Firmicutes_A	Clostridia	Lachnospirales	UBA1390	NSJ-32	NSJ-32 sp.	b258cb47d316fcf6c904c1fecb65393a
4	Bacteria	Firmicutes_A	Clostridia	Lachnospirales	Anaerotignaceae	Family_Anaerotignaceae	Family_Anaerotignaceae	f156b3d200821aa32f14e6413744f12a
1	Bacteria	Firmicutes_A	Clostridia	Lachnospirales	Anaerotignaceae	Anaerotignum	Anaerotignum sp.	056bb1b059c8e8d5ea24e14da97abef2
4	Bacteria	Firmicutes_A	Clostridia	Lachnospirales	Anaerotignaceae	Anaerotignum	Anaerotignum faecicola	f7b1718b968789616ad766b4ec1d5151
1	Bacteria	Firmicutes_A	Clostridia	Lachnospirales	Anaerotignaceae	Anaerotignum	Anaerotignum sp.2	5cdc21d0767f8299796f3ed451bf9ed4
2	Bacteria	Firmicutes_A	Clostridia	Lachnospirales	Anaerotignaceae	Anaerotignum	Anaerotignum lactatifermentans/sp001304995	a4e5fa843fb3038e70fc6cb1bb062c58
1	Bacteria	Firmicutes_A	Clostridia	TANB77	CAG-465	CAG-465	CAG-465 sp.	08d9b018d3c9e4cbbe9910f7cd74f7bb
1	Bacteria	Firmicutes_A	Clostridia	TANB77	CAG-465	CAG-465	CAG-465 sp.2	69f546964c45d01a57428c81c24ff127
3	Bacteria	Firmicutes_A	Clostridia	Lachnospirales	Order_Lachnospirales	Order_Lachnospirales	Order_Lachnospirales	6892a93fb1bac63b017298e7d4d3806d
1	Bacteria	Firmicutes_A	Clostridia	Oscillospirales	Acutalibacteraceae	HGM12789	HGM12789 sp.	2e5cf9683885170f7230566acfbb0cac
4	Bacteria	Firmicutes_A	Clostridia	Oscillospirales	Acutalibacteraceae	HGM12789	HGM12789 sp.2	b756b97c4699c393833e1a961c5f615b
1	Bacteria	Firmicutes_A	Clostridia	Oscillospirales	Acutalibacteraceae	Family_Acutalibacteraceae	Family_Acutalibacteraceae2	379caa3412365959192c714ea2217e60
4	Bacteria	Firmicutes_A	Clostridia	Oscillospirales	Acutalibacteraceae	HGM12789	HGM12789 sp.3	ebadb1db88a90daf5b4f5dc226e6a087
1	Bacteria	Firmicutes_A	Clostridia	Class_Clostridia	Class_Clostridia	Class_Clostridia	Class_Clostridia	561d87950758c7b761c557166d99c08d
1	Bacteria	Firmicutes_A	Clostridia	Monoglobales_A	UBA9506	UBA9506	UBA9506 sp003506415	f622a4722c8c27ece24b1e1b00e8bbf1
4	Bacteria	Firmicutes_A	Clostridia	Monoglobales	Monoglobaceae	Monoglobus	Monoglobus sp.	f74b0c44002799d053042b0aed689328
1	Bacteria	Firmicutes_A	Clostridia	Monoglobales	Monoglobaceae	Monoglobus	Monoglobus sp.2	9a24f0dec8e3ae34831690622a1a1746
4	Bacteria	Firmicutes_A	Clostridia	Monoglobales	Monoglobaceae	Monoglobus	Monoglobus pectinilyticus	c63c37d134abf9f1170ce79efef00f71
1	Bacteria	Firmicutes_A	Clostridia	Monoglobales_A	UBA1381	CAG-41	CAG-41 sp.	0e985f96c572ac96a8e3fadaace93953
4	Bacteria	Firmicutes_A	Clostridia	Monoglobales_A	UBA1381	CAG-41	CAG-41 sp900066215	4fad93adaab891f153808884f1da1fec
4	Bacteria	Firmicutes_A	Clostridia	Oscillospirales	Oscillospiraceae	Dysosmobacter	Dysosmobacter sp001916835	561dae43fde86dfca72443c721a3460d
1	Bacteria	Firmicutes_A	Clostridia	Oscillospirales	Oscillospiraceae	Dysosmobacter	Dysosmobacter sp.	dfa6d50597901962d9012e1bed686fc3
4	Bacteria	Firmicutes_A	Clostridia	Oscillospirales	Oscillospiraceae	Dysosmobacter	Dysosmobacter sp.2	e7b9cc3eb32d2c7a7193ff29c449295a
4	Bacteria	Firmicutes_A	Clostridia	Oscillospirales	Oscillospiraceae	CAG-110	CAG-110 sp.3	0d2fe51dccb8be314ecd516bb6a5d79c
4	Bacteria	Firmicutes_A	Clostridia	Oscillospirales	Oscillospiraceae	CAG-110	CAG-110 sp.4	4912f4e7c755b0e2bf70ff01bddf2b32
1	Bacteria	Firmicutes_A	Clostridia	Oscillospirales	Oscillospiraceae	CAG-110	CAG-110 sp.5	f9fe9dcc29907ab5ebb7167b14a73b2a
1	Bacteria	Firmicutes_A	Clostridia	Oscillospirales	Oscillospiraceae	CAG-110	CAG-110 sp.6	31ffa81690e2b24bcd7a8182f26e5dc6
4	Bacteria	Firmicutes_A	Clostridia	Oscillospirales	Oscillospiraceae	Family_Oscillospiraceae	Family_Oscillospiraceae	43fbaa94ecb1300ad33f490d157c0bcb
4	Bacteria	Firmicutes_A	Clostridia	Oscillospirales	Oscillospiraceae	CAG-110	CAG-110 sp.7	a392368c01c0d393662d93b2e50553a6
4	Bacteria	Firmicutes_A	Clostridia	Oscillospirales	Oscillospiraceae	CAG-110	CAG-110 sp.8	ca666c1acdbb31aa1923172c2c04e925
1	Bacteria	Firmicutes_A	Clostridia	Oscillospirales	Oscillospiraceae	CAG-110	CAG-110 sp.9	11a8763e21b48c71a1079d58f154cc1b
4	Bacteria	Firmicutes_A	Clostridia	Oscillospirales	Acutalibacteraceae	CAG-177	CAG-177 sp.	943ab1fbd46298a61f8dd7472a713334
1	Bacteria	Firmicutes_A	Clostridia	Oscillospirales	Acutalibacteraceae	Family_Acutalibacteraceae	Family_Acutalibacteraceae3	08ca50f54411d8d84c4223e5ca72f630
1	Bacteria	Firmicutes_A	Clostridia	Oscillospirales	Acutalibacteraceae	Family_Acutalibacteraceae	Family_Acutalibacteraceae4	543b7fb77e61ef870947cc5894a703e4
1	Bacteria	Firmicutes_A	Clostridia	Oscillospirales	Acutalibacteraceae	Eubacterium_R	Eubacterium_R sp.	4c6c811ba955e3265e8037d9b3528590
1	Bacteria	Firmicutes_A	Clostridia	Oscillospirales	Acutalibacteraceae	Eubacterium_R	Eubacterium_R coprostanoligenes/sp900539325	3b470f4f948a807edc3dc0f5e55cce37
4	Bacteria	Firmicutes_A	Clostridia	Oscillospirales	Acutalibacteraceae	Eubacterium_R	Eubacterium_R sp.2	269e64276a91bc92a9ba3ed05a0e0e0d
3	Bacteria	Firmicutes_A	Clostridia	Oscillospirales	Acutalibacteraceae	Eubacterium_R	Eubacterium_R sp.3	67f5dcc71acb887be2323dc2c1d099c7
1	Bacteria	Firmicutes_A	Clostridia	Oscillospirales	Acutalibacteraceae	Eubacterium_R	Eubacterium_R sp.4	c9338a1cf345b1be3607d6b208f1d7e0
4	Bacteria	Firmicutes_A	Clostridia	Oscillospirales	Acutalibacteraceae	Eubacterium_R	Eubacterium_R sp900539845	69775605d9dcf20e1b8f7cad45797896
4	Bacteria	Firmicutes_A	Clostridia	Oscillospirales	Acutalibacteraceae	Eubacterium_R	Eubacterium_R sp.5	727a8794aec5a5f2d5f8b2e527f6a3ad
2	Bacteria	Firmicutes_A	Clostridia	Oscillospirales	Acutalibacteraceae	Eubacterium_R	Eubacterium_R sp.6	9013c96aac5e8abef7349114b86cc3c2
4	Bacteria	Firmicutes_A	Clostridia	Oscillospirales	Acutalibacteraceae	Eubacterium_R	Eubacterium_R sp.7	321af55ab507e7bcc318588fbea45e69
1	Bacteria	Firmicutes_A	Clostridia	Oscillospirales	Acutalibacteraceae	UBA737	UBA737 sp.	abc88a2efe48541c4d18e922d496a1bb
4	Bacteria	Firmicutes_A	Clostridia	Oscillospirales	Ruminococcaceae	CAG-115	CAG-115 sp.	d5b7159a36e215dd7d0425b74f9962b0
1	Bacteria	Firmicutes_A	Clostridia	Oscillospirales	Order_Oscillospirales	Order_Oscillospirales	Order_Oscillospirales	b87333e0626d99139041913fb05c0b2b
1	Bacteria	Firmicutes_A	Clostridia	Oscillospirales	Acutalibacteraceae	Family_Acutalibacteraceae	Family_Acutalibacteraceae5	973800bed3a6eb85406cdba212fa93d7
4	Bacteria	Firmicutes_A	Clostridia	Oscillospirales	Acutalibacteraceae	Family_Acutalibacteraceae	Family_Acutalibacteraceae6	54fe524342380c8bf7ed42580bd17deb
4	Bacteria	Firmicutes_A	Clostridia	Oscillospirales	Acutalibacteraceae	Hydrogeniiclostridium	Hydrogeniiclostridium mannosilyticum	c949a95020bbfabfa3cea46e9d73f368
1	Bacteria	Firmicutes_A	Clostridia	Oscillospirales	Ruminococcaceae	Faecalibacterium	Faecalibacterium sp.	09430aa85697d98a9c077998e28cc623
1	Bacteria	Firmicutes_A	Clostridia	Oscillospirales	Ruminococcaceae	Faecalibacterium	Faecalibacterium sp.2	08df79447950702f9e045619dea52f8a
4	Bacteria	Firmicutes_A	Clostridia	Oscillospirales	Ruminococcaceae	Faecalibacterium	Faecalibacterium prausnitzii_C/prausnitzii_D	8c6735ac4ccdca8c2197b6a6e0e62c39
1	Bacteria	Firmicutes_A	Clostridia	Oscillospirales	Ruminococcaceae	Faecalibacterium	Faecalibacterium sp.3	1051c7a33d7247cdf5acdf1f8aed69db
1	Bacteria	Firmicutes_A	Clostridia	Oscillospirales	Ruminococcaceae	Faecalibacterium	Faecalibacterium sp.4	35ca86784e23cff061aa8d05d58a2bcf
2	Bacteria	Firmicutes_A	Clostridia	Oscillospirales	Ruminococcaceae	Faecalibacterium	Faecalibacterium sp.5	0c36647947a7f5ca771f9eae6ebed807
1	Bacteria	Firmicutes_A	Clostridia	Oscillospirales	Ruminococcaceae	Faecalibacterium	Faecalibacterium sp.6	52ce2779b53b6fa280c7ee15b2963d1e
1	Bacteria	Firmicutes_A	Clostridia	Oscillospirales	Ruminococcaceae	Faecalibacterium	Faecalibacterium sp.7	0d99d7d2e772dc432ae83740ac7fc603
1	Bacteria	Firmicutes_A	Clostridia	Oscillospirales	Ruminococcaceae	Faecalibacterium	Faecalibacterium sp.8	a813cbe34dd8bd8b8de65815b4fb7f83
1	Bacteria	Firmicutes_A	Clostridia	Oscillospirales	Ruminococcaceae	Faecalibacterium	Faecalibacterium sp.9	d618cac7df18c33ac91fe52267dcff04
1	Bacteria	Firmicutes_A	Clostridia	Oscillospirales	Ruminococcaceae	Faecalibacterium	Faecalibacterium prausnitzii_E	15853eb9bc95888248d6f509d89fd22f
4	Bacteria	Firmicutes_A	Clostridia	Oscillospirales	Ruminococcaceae	Faecalibacterium	Faecalibacterium prausnitzii_A/prausnitzii_J	7b78c6cf5c812a0aa4214c5d34a549e7
1	Bacteria	Firmicutes_A	Clostridia	Oscillospirales	Ruminococcaceae	Faecalibacterium	Faecalibacterium sp.10	f44636c0c3d55bc052aeed738e6e6cfa
1	Bacteria	Firmicutes_A	Clostridia	Oscillospirales	Ruminococcaceae	Faecalibacterium	Faecalibacterium sp.11	99ccf84bd53458682c1dc0f9ee735c2c
1	Bacteria	Firmicutes_A	Clostridia	Oscillospirales	Ruminococcaceae	Faecalibacterium	Faecalibacterium sp.12	0ecd22c5a909071765e70406f441bb7d
1	Bacteria	Firmicutes_A	Clostridia	Oscillospirales	Ruminococcaceae	Faecalibacterium	Faecalibacterium prausnitzii_H	5de46b30dcb6c32aeb614737654156a0
1	Bacteria	Firmicutes_A	Clostridia	Oscillospirales	Ruminococcaceae	Faecalibacterium	Faecalibacterium sp.13	4613a7afe76ab02552d2c909aaec461d
4	Bacteria	Firmicutes_A	Clostridia	Oscillospirales	Ruminococcaceae	Faecalibacterium	Faecalibacterium prausnitzii_I	14f4267ee34d1549822e9010f627d626
1	Bacteria	Firmicutes_A	Clostridia	Oscillospirales	Ruminococcaceae	Faecalibacterium	Faecalibacterium sp.14	531ffb0482ba00c766ee0faec4576fa4
2	Bacteria	Firmicutes_A	Clostridia	Oscillospirales	Ruminococcaceae	Faecalibacterium	Faecalibacterium sp.15	27ede8c0cde0137ea78d8e979166d86e
1	Bacteria	Firmicutes_A	Clostridia	Oscillospirales	Ruminococcaceae	Faecalibacterium	Faecalibacterium sp.16	36219a2137dc1e12b21b66430735b14c
1	Bacteria	Firmicutes_A	Clostridia	Oscillospirales	Ruminococcaceae	Faecalibacterium	Faecalibacterium sp.17	c0ca4bcc1ad56c85fba6b8ee56beb1a2
1	Bacteria	Firmicutes_A	Clostridia	Oscillospirales	Ruminococcaceae	Faecalibacterium	Faecalibacterium sp.18	3ba02a875792b9cf0a719844e32af074
2	Bacteria	Firmicutes_A	Clostridia	Oscillospirales	Ruminococcaceae	Faecalibacterium	Faecalibacterium sp.19	095139331521e05a791483d752b15e1c
1	Bacteria	Firmicutes_A	Clostridia	Oscillospirales	Ruminococcaceae	Faecalibacterium	Faecalibacterium sp.20	a6e44660bbff1d43f5c9b20132f9c1c5
1	Bacteria	Firmicutes_A	Clostridia	Oscillospirales	Ruminococcaceae	Faecalibacterium	Faecalibacterium sp.21	14b535a93b3377a72cd7815ea1e8f8ee
2	Bacteria	Firmicutes_A	Clostridia	Oscillospirales	Ruminococcaceae	Faecalibacterium	Faecalibacterium sp.22	c2f8fb43e84d46345c6630c6d2eb3342
1	Bacteria	Firmicutes_A	Clostridia	Oscillospirales	Ruminococcaceae	Faecalibacterium	Faecalibacterium sp.23	afb78f2647a81597c2d270d05dd3a200
2	Bacteria	Firmicutes_A	Clostridia	Oscillospirales	Ruminococcaceae	Faecalibacterium	Faecalibacterium sp.24	f5ab8244460d1988b40f85a9347297c7
2	Bacteria	Firmicutes_A	Clostridia	Oscillospirales	Ruminococcaceae	Faecalibacterium	Faecalibacterium sp.25	1921dd155d7531eb3b349749c615770e
2	Bacteria	Firmicutes_A	Clostridia	Oscillospirales	Ruminococcaceae	Faecalibacterium	Faecalibacterium sp.26	9503f025bb92e69c48cc3eedb82f5c35
1	Bacteria	Firmicutes_A	Clostridia	Oscillospirales	Ruminococcaceae	Faecalibacterium	Faecalibacterium sp.27	1c7ec0535df09c637137cf68203466ca
1	Bacteria	Firmicutes_A	Clostridia	Oscillospirales	Ruminococcaceae	Faecalibacterium	Faecalibacterium sp.28	2684d860418678e413027dd268a35d70
1	Bacteria	Firmicutes_A	Clostridia	Oscillospirales	Ruminococcaceae	Faecalibacterium	Faecalibacterium sp.29	066cbdee1a31ce7b67110b66f4e10232
1	Bacteria	Firmicutes_A	Clostridia	Oscillospirales	Ruminococcaceae	Faecalibacterium	Faecalibacterium sp.30	3570287c27bf410d50e12307bb1b2b2c
1	Bacteria	Firmicutes_A	Clostridia	Oscillospirales	Ruminococcaceae	Faecalibacterium	Faecalibacterium prausnitzii	9a031c61d97835d3cea58acd87d2d9a6
4	Bacteria	Firmicutes_A	Clostridia	Oscillospirales	Ruminococcaceae	Ruthenibacterium	Ruthenibacterium lactatiformans	f4b701d8de11130d05351de82fa9aa16
4	Bacteria	Firmicutes_A	Clostridia	Oscillospirales	Ruminococcaceae	Ruthenibacterium	Ruthenibacterium sp900546885	73a74165f2e08f623608a2d7d3aebfdc
4	Bacteria	Firmicutes_A	Clostridia	Oscillospirales	Acutalibacteraceae	Pseudoruminococcus	Pseudoruminococcus massiliensis	f14efb130dfc0e084d08e0f819551e16
4	Bacteria	Firmicutes_A	Clostridia	Oscillospirales	Acutalibacteraceae	Ruminococcus_E	Ruminococcus_E sp.	744bc5a5fbcb85628b8761129964d4d2
3	Bacteria	Firmicutes_A	Clostridia	Oscillospirales	Acutalibacteraceae	Ruminococcus_E	Ruminococcus_E bromii/bromii_B/sp900765785	848c5f08a0a08680e0f2783a9088fc53
1	Bacteria	Firmicutes_A	Clostridia	Oscillospirales	Acutalibacteraceae	Ruminococcus_E	Ruminococcus_E sp.2	e70c1e3934209fc06d98b1e3db185e14
4	Bacteria	Firmicutes_A	Clostridia	Oscillospirales	Acutalibacteraceae	Anaeromassilibacillus	Anaeromassilibacillus sp002159845	cc53d0b35f5399e09eb34be46ce0ac19
4	Bacteria	Firmicutes_A	Clostridia	Oscillospirales	Acutalibacteraceae	UBA1417	UBA1417 sp003531055	cd866adfa7f4fe3e6ebf836ac7813e94
1	Bacteria	Firmicutes_A	Clostridia	Oscillospirales	Acutalibacteraceae	UBA1417	UBA1417 sp.	a3f2abd64e462dc86f8242a90d98ee66
4	Bacteria	Firmicutes_A	Clostridia	Oscillospirales	Acutalibacteraceae	Clostridium_A	Clostridium_A leptum	02f0d0d659e6c724bde427f58f9b504b
1	Bacteria	Firmicutes_A	Clostridia	Oscillospirales	Acutalibacteraceae	Clostridium_A	Clostridium_A sp.	ef72fa746d3614cc376f28acbd234579
1	Bacteria	Firmicutes_A	Clostridia	Oscillospirales	Acutalibacteraceae	Family_Acutalibacteraceae	Family_Acutalibacteraceae7	613acbe8ba9daa868238a92a3a8b19ca
1	Bacteria	Firmicutes_A	Clostridia	Oscillospirales	Acutalibacteraceae	Family_Acutalibacteraceae	Family_Acutalibacteraceae8	c7632c8c5a734f0dcea455536f5d47df
4	Bacteria	Firmicutes_A	Clostridia	Oscillospirales	Acutalibacteraceae	UMGS1071	UMGS1071 sp900548305	e1b6f8637b2574ac0bafc35dae376029
1	Bacteria	Firmicutes_A	Clostridia	Oscillospirales	Acutalibacteraceae	Ruminococcus_E	Ruminococcus_E sp.3	d494e23bee8bdf75833543dbb6297b72
1	Bacteria	Firmicutes_A	Clostridia	Oscillospirales	Acutalibacteraceae	Ruminococcus_E	Ruminococcus_E sp.4	ab11ffefc01eafa3974ef48d04410e0d
4	Bacteria	Firmicutes_A	Clostridia	Oscillospirales	Acutalibacteraceae	Ruminococcus_E	Ruminococcus_E sp003526955	403f35497324b34d9f9925a3c5619a30
1	Bacteria	Firmicutes_A	Clostridia	Oscillospirales	Acutalibacteraceae	Ruminococcus_E	Ruminococcus_E sp.5	b31f3d2d94b4c96e6152b5f69bcf89af
1	Bacteria	Firmicutes_A	Clostridia	Oscillospirales	Acutalibacteraceae	Ruminococcus_E	Ruminococcus_E sp.6	575134b47527f43326a5bfe2c4676885
3	Bacteria	Firmicutes_A	Clostridia	Oscillospirales	Ruminococcaceae	Ruminococcus_D	Ruminococcus_D bicirculans	4bc8e35f3e060dd71a46d502972c5b45
1	Bacteria	Firmicutes_A	Clostridia	Oscillospirales	Ruminococcaceae	Ruminococcus_F	Ruminococcus_F champanellensis	bdb5d780eb4ac1144d86986f3fbc53e6
4	Bacteria	Firmicutes_A	Clostridia	Oscillospirales	Ruminococcaceae	Ruminococcus_C	Ruminococcus_C sp000980705	756a10869043de66c4c0102d841ea37f
4	Bacteria	Firmicutes_A	Clostridia	Oscillospirales	Ruminococcaceae	Ruminococcus_C	Ruminococcus_C callidus	a0624af9a9f2bab5480ddf8c675f0333
1	Bacteria	Firmicutes_A	Clostridia	Oscillospirales	Ruminococcaceae	Ruminococcus_F	Ruminococcus_F sp.	a894ef8b380283cbfa4362d69a71cbb6
1	Bacteria	Firmicutes_A	Clostridia	Oscillospirales	Ruminococcaceae	Ruminococcus_F	Ruminococcus_F sp.2	224f8da0f67d370ffbce8db0e0c87fa3
4	Bacteria	Firmicutes_A	Clostridia	Oscillospirales	Oscillospiraceae	Flavonifractor	Flavonifractor sp.	0a63f5e544d7082fa3f5537ec0e87eee
4	Bacteria	Firmicutes_A	Clostridia	Oscillospirales	Oscillospiraceae	Family_Oscillospiraceae	Family_Oscillospiraceae2	b32268f34c46bc29bbfef6551620cf0c
2	Bacteria	Firmicutes_A	Clostridia	Oscillospirales	Oscillospiraceae	Intestinimonas	Intestinimonas butyriciproducens	820124e3b430eff2646be0c8362f5f0e
4	Bacteria	Firmicutes_A	Clostridia	Oscillospirales	Oscillospiraceae	Intestinimonas	Intestinimonas sp.	b611df6f5e385630f87d133001d991a7
4	Bacteria	Firmicutes_A	Clostridia	Oscillospirales	Oscillospiraceae	Intestinimonas	Intestinimonas sp.2	82205c7bd9bfbb268f25e775f90f88c4
1	Bacteria	Firmicutes_A	Clostridia	Oscillospirales	Oscillospiraceae	Flavonifractor	Flavonifractor gabonensis	cde5efec2190fe259dc6c607c0297fb3
4	Bacteria	Firmicutes_A	Clostridia	Oscillospirales	Oscillospiraceae	Lawsonibacter	Lawsonibacter asaccharolyticus	664462ab7eefee3200344159c4cf579d
1	Bacteria	Firmicutes_A	Clostridia	Oscillospirales	Oscillospiraceae	Intestinimonas	Intestinimonas massiliensis	461c9b1ce42c89b7f501a816807ee2d3
2	Bacteria	Firmicutes_A	Clostridia	Oscillospirales	Oscillospiraceae	Flavonifractor	Flavonifractor plautii/sp000508885	e8c0f8c73ce984d11e89e3e13b6b21e4
4	Bacteria	Firmicutes_A	Clostridia	Oscillospirales	Oscillospiraceae	Lawsonibacter	Lawsonibacter sp.	ba1d4ad4fd14f692ff3d6d079336ff00
4	Bacteria	Firmicutes_A	Clostridia	Oscillospirales	Oscillospiraceae	Lawsonibacter	Lawsonibacter sp014287875	31cec745ca114f62d749b76573c96e5c
2	Bacteria	Firmicutes_A	Clostridia	Oscillospirales	Oscillospiraceae	Lawsonibacter	Lawsonibacter sp900066825/sp902363045	76a5ed26e0449bbe5a842ab9f9d2da29
1	Bacteria	Firmicutes_A	Clostridia	Oscillospirales	Acutalibacteraceae	Marseille-P4683	Marseille-P4683 sp.	eecdebda3e44c05c7da0be56191495a2
4	Bacteria	Firmicutes_A	Clostridia	Oscillospirales	Oscillospiraceae	Evtepia	Evtepia gabavorous	e423f31d767d5a0b62136653ce9777e6
1	Bacteria	Firmicutes_A	Clostridia	Oscillospirales	Ruminococcaceae	Ruminiclostridium_E	Ruminiclostridium_E sp.	e31a9028c809bc514de195ad80d61f98
4	Bacteria	Firmicutes_A	Clostridia	Oscillospirales	Ruminococcaceae	Ruminiclostridium_E	Ruminiclostridium_E siraeum	15aa477d88290bc207c8ef543d203aeb
2	Bacteria	Firmicutes_A	Clostridia	Oscillospirales	Ruminococcaceae	CAG-115	CAG-115 sp.2	c97908d2d3661f798e98fbf84f1640e9
1	Bacteria	Firmicutes_A	Clostridia	Oscillospirales	Ruminococcaceae	Ruminococcus	Ruminococcus sp.	6aeb1fc01b2d15be8bbad54e0e77db55
1	Bacteria	Firmicutes_A	Clostridia	Oscillospirales	Ruminococcaceae	Ruminococcus	Ruminococcus sp.2	37cf41ba6a835a0cb54f32de11720e9c
4	Bacteria	Firmicutes_A	Clostridia	Oscillospirales	Ruminococcaceae	Ruminococcus	Ruminococcus sp.3	1d6ee33f21a4451695b96e5aee6fe80e
1	Bacteria	Firmicutes_A	Clostridia	Oscillospirales	Ruminococcaceae	UBA1394	UBA1394 sp900066845	44a29d2916e705847e92d7c93eef50f5
4	Bacteria	Firmicutes_A	Clostridia	Oscillospirales	Ruminococcaceae	Family_Ruminococcaceae	Family_Ruminococcaceae	2ecebbc1d9d185dad78b811e4d0bcb64
1	Bacteria	Firmicutes_A	Clostridia	Oscillospirales	Ruminococcaceae	Gemmiger	Gemmiger sp.	817744e10d3d5788221ba592f55db36e
1	Bacteria	Firmicutes_A	Clostridia	Oscillospirales	Ruminococcaceae	Gemmiger	Gemmiger sp.2	2a3a3f558a00722b53aa30d692dee196
1	Bacteria	Firmicutes_A	Clostridia	Oscillospirales	Ruminococcaceae	Gemmiger	Gemmiger sp.3	cbe9a8a01dcf8063c1178300071de3bc
4	Bacteria	Firmicutes_A	Clostridia	Oscillospirales	Ruminococcaceae	Gemmiger	Gemmiger sp900540595	b213fefdccc6c0e773fe51b1e24aa002
1	Bacteria	Firmicutes_A	Clostridia	Oscillospirales	Ruminococcaceae	Gemmiger	Gemmiger sp.4	8913a9fe559e829d86e1eadbd06138db
4	Bacteria	Firmicutes_A	Clostridia	Oscillospirales	Ruminococcaceae	Gemmiger	Gemmiger sp.5	34adb781597a6dcf0f4ed3c6e0f47808
4	Bacteria	Firmicutes_A	Clostridia	Oscillospirales	Ruminococcaceae	Gemmiger	Gemmiger sp.6	b63aeb289edd30253a8e518d2a58a199
4	Bacteria	Firmicutes_A	Clostridia	Oscillospirales	Ruminococcaceae	Gemmiger	Gemmiger sp.7	1db1544591de47ecee6966624b2ab5cf
4	Bacteria	Firmicutes_A	Clostridia	Oscillospirales	Ruminococcaceae	Gemmiger	Gemmiger qucibialis	1098984a7d050f69b802c3c870681c70
1	Bacteria	Firmicutes_A	Clostridia	Oscillospirales	Ruminococcaceae	Gemmiger	Gemmiger sp.8	d9ee9cf1ccb59e4eabaed2e65a644071
1	Bacteria	Firmicutes_A	Clostridia	Oscillospirales	Ruminococcaceae	Gemmiger	Gemmiger sp.9	7c14e29b672b94375b63a27f9ddef041
4	Bacteria	Firmicutes_A	Clostridia	Oscillospirales	Ruminococcaceae	QAMM01	QAMM01 sp.	562d5f7f24a7408773fa6bc7a66a62d3
2	Bacteria	Firmicutes_A	Clostridia	Oscillospirales	Ruminococcaceae	Anaerotruncus	Anaerotruncus colihominis/colihominis_A	e8876853853f1863fd77efbd7d874967
4	Bacteria	Firmicutes_A	Clostridia	Oscillospirales	Ruminococcaceae	QANG01	QANG01 sp.	cc4e60b0eed0af6535d2cff0f5d74055
1	Bacteria	Firmicutes_A	Clostridia	Oscillospirales	Ruminococcaceae	Angelakisella	Angelakisella sp.	9a70d6ee6ce9bdf4bbfa8c69207844d6
1	Bacteria	Firmicutes_A	Clostridia	Oscillospirales	Acutalibacteraceae	CAG-488	CAG-488 sp.	dc859aa93c8aa15d9042dc727ab7a3cc
4	Bacteria	Firmicutes_A	Clostridia	Oscillospirales	Oscillospiraceae	CAG-110	CAG-110 sp.10	b3aa77f75bf60d05cb3f85bb75047b33
4	Bacteria	Firmicutes_A	Clostridia	Oscillospirales	Oscillospiraceae	CAG-83	CAG-83 sp.	1b97f2ee29357d9a76a2707ea7e4fb12
4	Bacteria	Firmicutes_A	Clostridia	Oscillospirales	Oscillospiraceae	CAG-83	CAG-83 sp.2	e2909c081c72a1d4a6a244e58884e5dd
4	Bacteria	Firmicutes_A	Clostridia	Oscillospirales	Oscillospiraceae	CAG-83	CAG-83 sp.3	64ce1334652cc892b93632bfad85454d
4	Bacteria	Firmicutes_A	Clostridia	Oscillospirales	Oscillospiraceae	CAG-83	CAG-83 sp.4	3356a3cf84e67f03ca7326af8eba461a
4	Bacteria	Firmicutes_A	Clostridia	Oscillospirales	Oscillospiraceae	CAG-83	CAG-83 sp.5	e88af4326a86b935b2f19204f4dd2130
4	Bacteria	Firmicutes_A	Clostridia	Oscillospirales	Oscillospiraceae	CAG-83	CAG-83 sp900545585	8036a70608aff1a11c728ceaeabb7342
3	Bacteria	Firmicutes_A	Clostridia	Oscillospirales	Oscillospiraceae	Dysosmobacter	Dysosmobacter welbionis	829d32a789b9dbc69b3f914f8f6eb3b1
4	Bacteria	Firmicutes_A	Clostridia	Oscillospirales	Oscillospiraceae	Oscillibacter	Oscillibacter sp.	e7de2c8b32c91f8497bcf70e48e80bb6
1	Bacteria	Firmicutes_A	Clostridia	Oscillospirales	Oscillospiraceae	Dysosmobacter	Dysosmobacter sp.3	4a2b25fef1ff1f9ed399dc305042bf6d
4	Bacteria	Firmicutes_A	Clostridia	Oscillospirales	Oscillospiraceae	Dysosmobacter	Dysosmobacter sp014297375	cdbbc01d08b6e11e5846b0ae7c953a02
4	Bacteria	Firmicutes_A	Clostridia	Oscillospirales	Oscillospiraceae	CAG-83	CAG-83 sp.6	a2e2cf7e4ebe8a2085905b37cc32a691
1	Bacteria	Firmicutes_A	Clostridia	Oscillospirales	Oscillospiraceae	ER4	ER4 sp.	9f36c0e7383edee399e60f210269c68e
4	Bacteria	Firmicutes_A	Clostridia	Oscillospirales	Oscillospiraceae	ER4	ER4 sp000765235	afad03e367769293f5c0548ed1e698eb
4	Bacteria	Firmicutes_A	Clostridia	Oscillospirales	Oscillospiraceae	ER4	ER4 sp.2	23e12bf63100f8234bee0c3200fc4803
1	Bacteria	Firmicutes_A	Clostridia	Oscillospirales	Ruminococcaceae	Gemmiger	Gemmiger sp.10	c458f0a14e8976cce6abd09e911da3ae
4	Bacteria	Firmicutes_A	Clostridia	Oscillospirales	Ruminococcaceae	Gemmiger	Gemmiger variabilis_B	4c407a2fae7af12f863fec08f5e1d8d4
1	Bacteria	Firmicutes_A	Clostridia	Oscillospirales	Ruminococcaceae	Gemmiger	Gemmiger sp.11	a89adf984d117c66c132111d1422fc99
4	Bacteria	Firmicutes_A	Clostridia	Oscillospirales	Ruminococcaceae	Gemmiger	Gemmiger sp.12	534d6dc54befefaf76f244bac5ad3046
4	Bacteria	Firmicutes_A	Clostridia	Oscillospirales	Ruminococcaceae	Gemmiger	Gemmiger sp.13	7734d005be90b9b7da64011c2921ac6f
4	Bacteria	Firmicutes_A	Clostridia	Class_Clostridia	Class_Clostridia	Class_Clostridia	Class_Clostridia2	90925855755f3d2c435f50fe49c9efd5
4	Bacteria	Firmicutes_A	Clostridia	Class_Clostridia	Class_Clostridia	Class_Clostridia	Class_Clostridia3	b6c3a3eee645c95e990e550d7f5a61a9
1	Bacteria	Firmicutes_A	Clostridia	Class_Clostridia	Class_Clostridia	Class_Clostridia	Class_Clostridia4	0aaeb8ed6d59161fd1ee00f7a479df22
1	Bacteria	Firmicutes_A	Clostridia	Oscillospirales	CAG-272	QALR01	QALR01 sp.	8b9e775d584fa1a37d46184c6b1a4927
1	Bacteria	Firmicutes_A	Clostridia	Oscillospirales	CAG-272	UBA1248	UBA1248 sp.	c6ced1ca14416677a4e73eb8caeae2c0
1	Bacteria	Firmicutes_A	Clostridia	Oscillospirales	CAG-382	SFLA01	SFLA01 sp.	3860b38bf9a3881103a15975639e20f8
1	Bacteria	Firmicutes_A	Clostridia	Oscillospirales	CAG-272	Family_CAG-272	Family_CAG-272	ee17f1608d472bebf149c3a79aff2d5c
4	Bacteria	Firmicutes_A	Clostridia	Oscillospirales	CAG-272	QALR01	QALR01 sp.2	b86d7f60407b7910a0c7033b26ae2c6c
4	Bacteria	Firmicutes_A	Clostridia	Oscillospirales	CAG-272	QALR01	QALR01 sp.3	0636d9e9fd28bf72b4ec65719d1bac43
1	Bacteria	Firmicutes_A	Clostridia	Oscillospirales	CAG-272	RUG13077	RUG13077 sp.	0becd30627d966be4e16fb8b9dc82601
4	Bacteria	Firmicutes_A	Clostridia	Oscillospirales	CAG-272	RUG13077	RUG13077 sp.2	d2b421c015874693dff6902c769eb251
1	Bacteria	Firmicutes_A	Clostridia	Oscillospirales	CAG-272	QALR01	QALR01 sp.4	5b7fe971dbab31cb67ab3e1e195a4cd5
1	Bacteria	Firmicutes_A	Clostridia	Oscillospirales	CAG-272	RUG13077	RUG13077 sp.3	3c77182055cf6252164cb9fa1fb64325
4	Bacteria	Firmicutes_A	Clostridia	Oscillospirales	CAG-272	UMGS1815	UMGS1815 sp.	a5febf1f9cbd7107b28a6a8fac0d12ac
1	Bacteria	Firmicutes_A	Clostridia	Oscillospirales	CAG-272	UMGS1815	UMGS1815 sp.2	47d07cf459b191d4b44134675ad234eb
4	Bacteria	Firmicutes_A	Clostridia	Oscillospirales	CAG-272	UMGS1815	UMGS1815 sp.3	0e70a0841394c5865f6eddb5ccea7084
4	Bacteria	Firmicutes_A	Clostridia	Oscillospirales	Butyricicoccaceae	Agathobaculum	Agathobaculum sp003481705	bb2927674a3e4e522bee8e52124456d8
4	Bacteria	Firmicutes_A	Clostridia	Oscillospirales	Butyricicoccaceae	Agathobaculum	Agathobaculum butyriciproducens	cf20efb6f04280c6a13db167eac6695e
3	Bacteria	Firmicutes_A	Clostridia	Oscillospirales	Butyricicoccaceae	Agathobaculum	Agathobaculum sp.	8f733d4d0ba2ebb23c1e5ae6cfc48466
2	Bacteria	Firmicutes_A	Clostridia	Lachnospirales	Lachnospiraceae	Lachnospira	Lachnospira sp.	e94322efaa6a28240cc29c79d5361ee6
2	Bacteria	Firmicutes_A	Clostridia	Lachnospirales	Lachnospiraceae	Lachnospira	Lachnospira eligens/eligens_A/sp003537285	0978d7032689ab3eeef2fc60e4490e11
1	Bacteria	Firmicutes_A	Clostridia	Lachnospirales	Lachnospiraceae	Lachnospira	Lachnospira sp.2	784147bda97865f48e2f966bce2561eb
1	Bacteria	Firmicutes_A	Clostridia	Lachnospirales	Lachnospiraceae	Lachnospira	Lachnospira sp.3	d124040ad57e76e732602df1cbd25478
2	Bacteria	Firmicutes_A	Clostridia	Lachnospirales	Lachnospiraceae	Lachnospira	Lachnospira sp.4	491e574b52d5af5866b61b028655fc28
3	Bacteria	Firmicutes_A	Clostridia	Lachnospirales	Lachnospiraceae	Lachnospira	Lachnospira sp003451515	501f8dcf16ca8fa72f1f13b405f53ab1
1	Bacteria	Firmicutes_A	Clostridia	Lachnospirales	Lachnospiraceae	Lachnospira	Lachnospira sp.5	ead2db223bdc20d82ef32941fb3911e9
1	Bacteria	Firmicutes_A	Clostridia	Lachnospirales	Lachnospiraceae	Lachnospira	Lachnospira sp.6	120df8f1a32baffc32f865850d69f3bd
1	Bacteria	Firmicutes_A	Clostridia	Lachnospirales	Lachnospiraceae	Anaerostipes	Anaerostipes sp.	b0519d6f91a893cc0502063d1a2b8577
1	Bacteria	Firmicutes_A	Clostridia	Lachnospirales	Lachnospiraceae	Anaerostipes	Anaerostipes sp.2	928366c2731edef60eaca3223874b8c7
3	Bacteria	Firmicutes_A	Clostridia	Lachnospirales	Lachnospiraceae	Anaerostipes	Anaerostipes hadrus/hadrus_A/sp900066705	f19f6eb0e557605030b949da68e33a3d
3	Bacteria	Firmicutes_A	Clostridia	Lachnospirales	Lachnospiraceae	Anaerostipes	Anaerostipes sp.3	510a2c5f0135f8d0fd90bb4db61342c9
1	Bacteria	Firmicutes_A	Clostridia	Lachnospirales	Lachnospiraceae	Anaerostipes	Anaerostipes sp.4	c3f0b048ca7540f14517de2c15b91d0f
1	Bacteria	Firmicutes_A	Clostridia	Lachnospirales	Lachnospiraceae	Anaerostipes	Anaerostipes sp.5	244d7565d7cf2bfa4b607e85f606a87e
1	Bacteria	Firmicutes_A	Clostridia	Lachnospirales	Lachnospiraceae	Anaerostipes	Anaerostipes sp.6	82d3234fee545743ef4b5c7b80f67f05
1	Bacteria	Firmicutes_A	Clostridia	Lachnospirales	Lachnospiraceae	Anaerostipes	Anaerostipes sp.7	ed996d227f80efb25b460664e8c6b013
1	Bacteria	Firmicutes_A	Clostridia	Lachnospirales	Lachnospiraceae	Anaerostipes	Anaerostipes sp.8	a869a48a4d8d757fc8f5240dbd76bb20
2	Bacteria	Firmicutes_A	Clostridia	Lachnospirales	Lachnospiraceae	Anaerostipes	Anaerostipes caccae/sp000508985	fb801f2e74ba7020f378636da2f3f81f
1	Bacteria	Firmicutes_A	Clostridia	Lachnospirales	Lachnospiraceae	Family_Lachnospiraceae	Family_Lachnospiraceae	40570145f37809857b3fd113bedfe52a
4	Bacteria	Firmicutes_A	Clostridia	Lachnospirales	Lachnospiraceae	CHKCI001	CHKCI001 sp.	672e44207e40e267b0a43fc95db1437d
4	Bacteria	Firmicutes_A	Clostridia	Lachnospirales	Lachnospiraceae	Family_Lachnospiraceae	Family_Lachnospiraceae2	6fb2fdaf1911298e9c9a76f6adeeea76
2	Bacteria	Firmicutes_A	Clostridia	Lachnospirales	Lachnospiraceae	Lachnospira	Lachnospira sp.7	bb0104db243f8e6865b32fa4dcff1f27
1	Bacteria	Firmicutes_A	Clostridia	Lachnospirales	Lachnospiraceae	Lachnospira	Lachnospira sp.8	1d61de690562349bb05d2c78f15c5e6f
3	Bacteria	Firmicutes_A	Clostridia	Lachnospirales	Lachnospiraceae	Lachnospira	Lachnospira rogosae_A	a3c5875f28ef694e242425c973474901
4	Bacteria	Firmicutes_A	Clostridia	Lachnospirales	Lachnospiraceae	Eubacterium_F	Eubacterium_F sp.	62b8f70797c032af32152b96d4afe855
1	Bacteria	Firmicutes_A	Clostridia	Lachnospirales	Lachnospiraceae	Eubacterium_F	Eubacterium_F sp.2	e17af9be816bb85177e929c21edb87d7
4	Bacteria	Firmicutes_A	Clostridia	Lachnospirales	Lachnospiraceae	Eubacterium_F	Eubacterium_F sp003491505	6b94f1d716700c3d5a87420881636467
4	Bacteria	Firmicutes_A	Clostridia	Lachnospirales	Lachnospiraceae	Eubacterium_F	Eubacterium_F sp.3	a61db419398e9e5422c9d9216d866e40
4	Bacteria	Firmicutes_A	Clostridia	Lachnospirales	Lachnospiraceae	CAG-127	CAG-127 sp900319515	59fc5a133d97107727b128e60826e0d0
1	Bacteria	Firmicutes_A	Clostridia	Lachnospirales	Lachnospiraceae	Eubacterium_G	Eubacterium_G sp000434315	ec856cbee96b45353bdf6c86d65a8c72
1	Bacteria	Firmicutes_A	Clostridia	Lachnospirales	Lachnospiraceae	UBA4285	UBA4285 sp.	b78405695307847021d707f2f981e4ae
1	Bacteria	Firmicutes_A	Clostridia	Lachnospirales	Lachnospiraceae	UBA4285	UBA4285 sp.2	b4f36013dae7d7ba0ceeaafb5842c6d9
4	Bacteria	Firmicutes_A	Clostridia	Lachnospirales	Lachnospiraceae	Coprococcus_A	Coprococcus_A catus	8247fe24732bcd252548f5dc27495c4a
4	Bacteria	Firmicutes_A	Clostridia	Lachnospirales	Lachnospiraceae	Anaerosacchariphilus	Anaerosacchariphilus sp014290175/sp900066385	efc278051332ba2f4b1afe761d494ff9
1	Bacteria	Firmicutes_C	Negativicutes	Veillonellales	Negativicoccaceae	Negativicoccus	Negativicoccus massiliensis	f5f1a33af4446db695a1cc5d41c1fa3c
1	Bacteria	Firmicutes_C	Negativicutes	Veillonellales	Negativicoccaceae	Negativicoccus	Negativicoccus succinicivorans	31ba8c05f7a37ea42eedf7ede57d7e89
1	Bacteria	Firmicutes_C	Negativicutes	Acidaminococcales	Acidaminococcaceae	Phascolarctobacterium_A	Phascolarctobacterium_A sp.3	57da0737b124344ac515151d822ed30e
1	Bacteria	Firmicutes_C	Negativicutes	Acidaminococcales	Acidaminococcaceae	Phascolarctobacterium_A	Phascolarctobacterium_A sp.4	2d4ba040aa1483843de6dd02657d65bd
2	Bacteria	Firmicutes_C	Negativicutes	Acidaminococcales	Acidaminococcaceae	Phascolarctobacterium_A	Phascolarctobacterium_A funiformis/sp900545025	c5762abe066cc91f964c9459527c0371
1	Bacteria	Firmicutes_C	Negativicutes	Acidaminococcales	Acidaminococcaceae	Phascolarctobacterium_A	Phascolarctobacterium_A sp.5	eb77d82d14ee0c30083bed4cc81a9ddf
1	Bacteria	Firmicutes_C	Negativicutes	Acidaminococcales	Acidaminococcaceae	Phascolarctobacterium_A	Phascolarctobacterium_A sp.6	84a5231a6addf9979a22559bbd0898cf
1	Bacteria	Firmicutes_C	Negativicutes	Acidaminococcales	Acidaminococcaceae	Phascolarctobacterium_A	Phascolarctobacterium_A sp.7	de5ee134fd4a2f474f731850fb0fc52e
1	Bacteria	Firmicutes_C	Negativicutes	Acidaminococcales	Acidaminococcaceae	Phascolarctobacterium_A	Phascolarctobacterium_A sp.8	2d456c8d722f4ccf4b8c4c443b5f00ba
1	Bacteria	Firmicutes_C	Negativicutes	Selenomonadales	Selenomonadaceae	Mitsuokella	Mitsuokella sp.	8ff868f07238909fd4f5d89646dbd490
1	Bacteria	Firmicutes_C	Negativicutes	Selenomonadales	Selenomonadaceae	Mitsuokella	Mitsuokella multacida	e9352868a3bbca88a60b42e1a9db809f
2	Bacteria	Firmicutes_C	Negativicutes	Veillonellales	Megasphaeraceae	Anaeroglobus	Anaeroglobus micronuciformis	44cec8943a6e384a4f1abadc3e9b7930
1	Bacteria	Firmicutes_C	Negativicutes	Veillonellales	Megasphaeraceae	Anaeroglobus	Anaeroglobus sp900240295	1c8b056d6952f6b70d6815559a75c0bf
1	Bacteria	Firmicutes_C	Negativicutes	Veillonellales	Megasphaeraceae	Megasphaera	Megasphaera elsdenii/sp000417505	57401bcff61823c2141badc9e4078785
1	Bacteria	Firmicutes_C	Negativicutes	Veillonellales	Megasphaeraceae	Megasphaera	Megasphaera sp001546855	c36b4faebdc82ad35dbc215fe5edd92a
1	Bacteria	Firmicutes_C	Negativicutes	Veillonellales	Veillonellaceae	Veillonella_A	Veillonella_A sp.	b34fcdb278514b737bc3707c12186571
1	Bacteria	Firmicutes_C	Negativicutes	Veillonellales	Veillonellaceae	Veillonella_A	Veillonella_A sp.2	f7f7dc26c7943b93f0854e0d96911905
1	Bacteria	Firmicutes_C	Negativicutes	Veillonellales	Veillonellaceae	Veillonella_A	Veillonella_A sp.3	c9bcecb016fbb95d934be53c86af4eab
1	Bacteria	Firmicutes_C	Negativicutes	Veillonellales	Veillonellaceae	Veillonella_A	Veillonella_A sp.4	329bd1a1ec313de79aba8e9e5eff07d6
1	Bacteria	Firmicutes_C	Negativicutes	Veillonellales	Veillonellaceae	Veillonella_A	Veillonella_A sp.5	800a98e4afebc3671d3ecb61c20a9ebf
1	Bacteria	Firmicutes_C	Negativicutes	Veillonellales	Veillonellaceae	Veillonella_A	Veillonella_A ratti/seminalis/sp000431435	107063e8453bf94891c4d7a17b00af07
1	Bacteria	Firmicutes_C	Negativicutes	Veillonellales	Veillonellaceae	Veillonella_A	Veillonella_A sp.6	cb6bd71d5fb4caadeaf3aa81335e98d2
1	Bacteria	Firmicutes_C	Negativicutes	Veillonellales	Dialisteraceae	Dialister	Dialister sp.3	42440d49964972d1e9a575062ed748e8
3	Bacteria	Firmicutes_C	Negativicutes	Veillonellales	Dialisteraceae	Dialister	Dialister sp.4	4d5512974bb5e74d555bdc9cf33c8d63
1	Bacteria	Firmicutes_C	Negativicutes	Veillonellales	Dialisteraceae	Dialister	Dialister sp.5	4d35335050089ddac775a5e1d9797002
1	Bacteria	Firmicutes_C	Negativicutes	Veillonellales	Dialisteraceae	Dialister	Dialister sp.6	cc0fe49fb25fcfcdfb7dd37e12638216
1	Bacteria	Firmicutes_C	Negativicutes	Veillonellales	Dialisteraceae	Dialister	Dialister sp.7	516b28a6b56b8b85e9b3d9bd26ed8419
1	Bacteria	Firmicutes_C	Negativicutes	Veillonellales	Dialisteraceae	Dialister	Dialister sp.8	ef5a779b6dab7f364d042205f39beb43
1	Bacteria	Firmicutes_C	Negativicutes	Veillonellales	Dialisteraceae	Dialister	Dialister sp.9	80e346d590b4f69d2239d7012f0af040
1	Bacteria	Firmicutes_C	Negativicutes	Veillonellales	Dialisteraceae	Dialister	Dialister sp.10	7444e4d35f603fc6bb1fd4421399b464
1	Bacteria	Firmicutes_C	Negativicutes	Veillonellales	Dialisteraceae	Dialister	Dialister sp.11	2fcd64c6a1e0295d6487573a477c4a5e
1	Bacteria	Firmicutes_C	Negativicutes	Veillonellales	Dialisteraceae	Dialister	Dialister sp.12	4c4f66fab9a057ffde363d6abbb821ee
3	Bacteria	Firmicutes_C	Negativicutes	Veillonellales	Dialisteraceae	Dialister	Dialister invisus	5a4df5d35be6fef859c85d508eecb9a3
1	Bacteria	Firmicutes_C	Negativicutes	Veillonellales	Dialisteraceae	Dialister	Dialister sp.13	917473e110edbee6016b69a08610cf58
1	Bacteria	Firmicutes_C	Negativicutes	Veillonellales	Dialisteraceae	Dialister	Dialister sp.14	0f6015df6c4dbe4b4ed4d9578abc6d6c
1	Bacteria	Firmicutes_C	Negativicutes	Veillonellales	Dialisteraceae	Dialister	Dialister sp.15	0eb126624fc412d7a9a8e3f438159c58
1	Bacteria	Firmicutes_C	Negativicutes	Veillonellales	Dialisteraceae	Dialister	Dialister sp.16	625ebcdc01a6ae464668e8c2b9817a12
1	Bacteria	Firmicutes_C	Negativicutes	Veillonellales	Dialisteraceae	Dialister	Dialister succinatiphilus	88c752d1ab1028a27a0594bf467ea57c
1	Bacteria	Firmicutes_C	Negativicutes	Veillonellales	Dialisteraceae	Dialister	Dialister sp.17	d22ac6d31011c7447a9caf2950c5089e
1	Bacteria	Firmicutes_C	Negativicutes	Veillonellales	Dialisteraceae	Dialister	Dialister sp.18	8cc6ee249178cf5e841a04ca6a7709de
1	Bacteria	Firmicutes_C	Negativicutes	Veillonellales	Dialisteraceae	Dialister	Dialister sp.19	c5ab8b916c73fe535271d8f8ebcd4db1
1	Bacteria	Firmicutes_C	Negativicutes	Veillonellales	Dialisteraceae	Allisonella	Allisonella histaminiformans	414485fa738e9649bb740dd3b5bb55d5
1	Bacteria	Firmicutes_C	Negativicutes	Veillonellales	Dialisteraceae	Dialister	Dialister hominis	06f43c6ce19225ab67324a35077d902d
1	Bacteria	Firmicutes_C	Negativicutes	Veillonellales	Dialisteraceae	Dialister	Dialister sp900543165	d5fcd1aa41477bdde6c1ff99ea48c816
1	Bacteria	Firmicutes_C	Negativicutes	Veillonellales	Veillonellaceae	Veillonella	Veillonella sp.	053c3e3130b2c008551c018695faee5e
1	Bacteria	Firmicutes_C	Negativicutes	Veillonellales	Veillonellaceae	Veillonella	Veillonella denticariosi/parvula	b1e901df065c1957c94914667a6a5781
1	Bacteria	Firmicutes_C	Negativicutes	Veillonellales	Veillonellaceae	Veillonella	Veillonella sp.2	1c1d99d342e25899ffea4df5eeec3081
1	Bacteria	Firmicutes_C	Negativicutes	Veillonellales	Veillonellaceae	Veillonella	Veillonella sp.3	bb44afa4a4d1bf473bb3fa1c5427e8de
2	Bacteria	Firmicutes_C	Negativicutes	Veillonellales	Veillonellaceae	Veillonella	Veillonella tobetsuensis	aec516ac1da23d74219178fd7d3a3860
2	Bacteria	Firmicutes_C	Negativicutes	Veillonellales	Veillonellaceae	Veillonella	Veillonella atypica/rogosae	a935a1c5fca76c49def4254508d8bc60
1	Bacteria	Firmicutes_C	Negativicutes	Veillonellales	Veillonellaceae	Veillonella	Veillonella sp.4	12c6c021732ab97f7c870552c4024206
1	Bacteria	Firmicutes_C	Negativicutes	Veillonellales	Veillonellaceae	Veillonella	Veillonella sp.5	d2eca096e7eed6217b93d14b4ba62816
1	Bacteria	Firmicutes_C	Negativicutes	Veillonellales	Veillonellaceae	Veillonella	Veillonella sp.6	2908942e741f82aeee4cd588d6a561d1
1	Bacteria	Firmicutes_C	Negativicutes	Veillonellales	Veillonellaceae	Veillonella	Veillonella dispar/dispar_A/infantium/sp002959755/sp003463825	08b21f8171b35ef001832ba1df9b8fbc
1	Bacteria	Firmicutes_C	Negativicutes	Veillonellales	Veillonellaceae	Veillonella	Veillonella sp.7	2b42853c9422b6bb7faf8af6b060b6fc
1	Bacteria	Firmicutes_C	Negativicutes	Veillonellales	Veillonellaceae	Veillonella	Veillonella sp.8	e0a61295a7d600aeca34ce7ded7f6fbb
1	Bacteria	Firmicutes_C	Negativicutes	Veillonellales	Veillonellaceae	Veillonella	Veillonella sp.9	ea7da9e82d08285ecf058d105cfb5021
1	Bacteria	Firmicutes_C	Negativicutes	Veillonellales	Veillonellaceae	Veillonella	Veillonella sp.10	cefcb082e2993e3fdbe01e96e320a4bf
1	Bacteria	Firmicutes_C	Negativicutes	Veillonellales	Veillonellaceae	Veillonella	Veillonella sp.11	1f6deb27f5f981eea561172f96802b70
1	Bacteria	Firmicutes_C	Negativicutes	Veillonellales	Veillonellaceae	Veillonella	Veillonella sp.12	e8ed1896ea9aee9c9440dd4fe4b96a25
1	Bacteria	Firmicutes_C	Negativicutes	Veillonellales	Veillonellaceae	Veillonella	Veillonella parvula_A	50d6182d5d321721f2d223d9757415e2
1	Bacteria	Firmicutes_C	Negativicutes	Veillonellales	Veillonellaceae	Veillonella	Veillonella sp.13	5e50216313c32e6feb83c9f8bf3e1f10
2	Bacteria	Firmicutes_C	Negativicutes	Veillonellales	Veillonellaceae	Veillonella	Veillonella sp.14	cffa38ea99aa64b408c7c8fb9943f050
1	Bacteria	Firmicutes_C	Negativicutes	Veillonellales	Veillonellaceae	F0422	F0422 sp001553345/sp003992005/sp003992015/sp003992055/sp003992315/sp003999875/sp900766245	a4969866dfb5c9471824dabcae6f871f
1	Bacteria	Proteobacteria	Gammaproteobacteria	Xanthomonadales	Xanthomonadaceae	Stenotrophomonas	Stenotrophomonas maltophilia_AO/maltophilia_AP/maltophilia_Z/maltophilia_AA/rhizophila/rhizophila_A/rhizophila_B	89eb7a5979168231d1eda186a823511d
1	Bacteria	Proteobacteria	Gammaproteobacteria	Xanthomonadales	Xanthomonadaceae	Pseudoxanthomonas_A	Pseudoxanthomonas_A japonensis/mexicana/sp006716465	ac3901d4aa362040b8fb4e292359888b
1	Bacteria	Proteobacteria	Gammaproteobacteria	Pseudomonadales	Pseudomonadaceae	Pseudomonas_E	Pseudomonas_E antarctica/antarctica_A/azotoformans/azotoformans_A/canadensis/carnis/costantinii/edaphica/extremorientalis/fluorescens/kairouanensis/kitaguniensis/lactis/lurida/mandelii_B/paralactis/poae/reactans/salomonii/simiae/sp000346755/sp000612585/sp002255865/sp002843605/sp002979555/sp003014915/sp003097075/sp003208475/sp003852405/sp005938045/sp009834565/sp009866765/sp013385985/sp900580675/sp…	e1560e5a84cf55cda6e9e1a1ad09eb07
1	Bacteria	Proteobacteria	Gammaproteobacteria	Pseudomonadales	Pseudomonadaceae	Pseudomonas_E	Pseudomonas_E bubulae/deceptionensis/endophytica/fragi/fragi_D/helleri/helleri_A/lundensis/lundensis_A/psychrophila/saxonica/sp000346225/weihenstephanensis	00b63fb2be8ed74a52d9b9944d6ec1d5
1	Bacteria	Proteobacteria	Gammaproteobacteria	Pseudomonadales	Pseudomonadaceae	Pseudomonas	Pseudomonas aeruginosa/aeruginosa_A/indica/penaei/rhizosphaerae/sp007109405	9484af69784861fbfe437755ed83c0eb
1	Bacteria	Proteobacteria	Gammaproteobacteria	Enterobacterales	Succinivibrionaceae	Succinivibrio	Succinivibrio sp000431835/sp900315395	54944b9effedb9327118e759075327d9
1	Bacteria	Firmicutes	Bacilli	RF39	UBA660	RUG12438	RUG12438 sp.	898de54e6b0a051fc6f68c82e107b701
4	Bacteria	Firmicutes	Bacilli	RF39	UBA660	CAG-417	CAG-417 sp.	33c550aefe708e8bde9a2bd4b9aa1981
1	Bacteria	Firmicutes	Bacilli	RF39	UBA660	CAG-417	CAG-417 sp.2	37f5206af44bce334700e59c306b80f0
1	Bacteria	Firmicutes	Bacilli	RF39	UBA660	CAG-302	CAG-302 sp900549325	6dada60ed74e33602fa0be817ec353a9
1	Bacteria	Firmicutes	Bacilli	RF39	UBA660	UBA3631	UBA3631 sp900546275	a90594f833a27fbcfaa0c199e04c5c82
1	Bacteria	Firmicutes	Bacilli	RF39	UBA660	DUUS01	DUUS01 sp.	41089d30dadffea42351f14cfbdd0157
4	Bacteria	Firmicutes	Bacilli	RF39	UBA660	CAG-582	CAG-582 sp.	df6edbc5a176298263e4bd6e661cc5ea
1	Bacteria	Firmicutes	Bacilli	RF39	UBA660	CAG-628	CAG-628 sp.	96bec4d8e6089811de73256432c1457b
1	Bacteria	Firmicutes	Bacilli	RF39	UBA660	CAG-460	CAG-460 sp.	3aa2691a41b303ebf12514660cad159c
1	Bacteria	Firmicutes	Bacilli	RF39	UBA660	CAG-1000	CAG-1000 sp.	5dae78d7c1f075200f9bf5bdac5c310e
4	Bacteria	Firmicutes	Bacilli	RF39	UBA660	CAG-1000	CAG-1000 sp.2	c3a7a4118726b5bf4d8e4b251aa64f72
1	Bacteria	Firmicutes	Bacilli	RF39	UBA660	CAG-460	CAG-460 sp.2	9e92964570f2f73dd67c1107c3b79229
1	Bacteria	Bacteroidota	Bacteroidia	Bacteroidales	Muribaculaceae	SFTJ01	SFTJ01 sp.	3fc434aad0b8acd681f377c4c83a06ac
1	Bacteria	Bacteroidota	Bacteroidia	Bacteroidales	Muribaculaceae	SFTJ01	SFTJ01 sp004563195	4f0074eb82a9ff093db7afbdebd63797
4	Bacteria	Bacteroidota	Bacteroidia	Bacteroidales	Muribaculaceae	SFTJ01	SFTJ01 sp.2	d43870e856174e9d4b38700e77c53e55
1	Bacteria	Bacteroidota	Bacteroidia	Bacteroidales	Muribaculaceae	SFTJ01	SFTJ01 sp.3	b50e9c08dd5b2920a446991bd0477b0b
4	Bacteria	Bacteroidota	Bacteroidia	Bacteroidales	Muribaculaceae	SFTJ01	SFTJ01 sp.4	cebf6e8d99ec4e68e17dafb60427646a
4	Bacteria	Firmicutes	Bacilli	RF39	UBA660	CAG-302	CAG-302 sp.	8e419ebbcadf353f96a055d6e2efa1ff
1	Bacteria	Firmicutes	Bacilli	RF39	UBA660	CAG-594	CAG-594 sp.	b05fda5dc8521bf334735f91e1fbb8c2
1	Bacteria	Firmicutes	Bacilli	RF39	UBA660	Family_UBA660	Family_UBA660	b7f4bda34a6ccf176e6548ad5de505d3
1	Bacteria	Firmicutes	Bacilli	Lactobacillales	Streptococcaceae	Lactococcus	Lactococcus hampsonii_B/lactis/lactis_A/lactis_E/sp003627095/sp004210295/sp006965445	e03e27988c6f78bb0d98d34f987dbcf6
4	Bacteria	Firmicutes_A	Clostridia	Lachnospirales	Lachnospiraceae	Anaerobutyricum	Anaerobutyricum sp.	6d4dedce286ca5ded40953a3f0d8d3be
4	Bacteria	Firmicutes_A	Clostridia	Lachnospirales	Lachnospiraceae	Anaerobutyricum	Anaerobutyricum hallii	b6592341b951857fdd6c3889f7c90e92
4	Bacteria	Firmicutes_A	Clostridia	Lachnospirales	Lachnospiraceae	Anaerobutyricum	Anaerobutyricum sp.2	8cac5020a3246ba5d66de27aa23f0148
1	Bacteria	Firmicutes_A	Clostridia	Lachnospirales	Lachnospiraceae	Anaerobutyricum	Anaerobutyricum sp.3	13ac0fbf25d3211954409d711335dbe8
1	Bacteria	Firmicutes_A	Clostridia	Lachnospirales	Lachnospiraceae	Anaerobutyricum	Anaerobutyricum sp.4	313ad522c4e74eaf89fd5079d3675576
4	Bacteria	Firmicutes_A	Clostridia	Lachnospirales	Lachnospiraceae	Anaerobutyricum	Anaerobutyricum sp.5	aab152bdc6432a7789b0f952e4c1ecc2
1	Bacteria	Firmicutes_A	Clostridia	Lachnospirales	Lachnospiraceae	Anaerobutyricum	Anaerobutyricum sp.6	8ec7ca17b950878f56969189eb47a2c3
4	Bacteria	Firmicutes_A	Clostridia	Lachnospirales	Lachnospiraceae	Anaerobutyricum	Anaerobutyricum soehngenii	14ae69f8d51ec27ec86ce28be033ddfa
4	Bacteria	Firmicutes_A	Clostridia	Lachnospirales	Lachnospiraceae	TF01-11	TF01-11 sp003529475	50b1e2271fda183a060b73f4b2950e9c
4	Bacteria	Firmicutes_A	Clostridia	Lachnospirales	Lachnospiraceae	Coprococcus	Coprococcus eutactus	f42bcefbf37a01aef7b9483ca5bf6961
1	Bacteria	Firmicutes_A	Clostridia	Lachnospirales	Lachnospiraceae	Coprococcus	Coprococcus sp000433075	37683329291b0de4bb2ab4c95e8385a2
4	Bacteria	Firmicutes_A	Clostridia	Lachnospirales	Lachnospiraceae	Coprococcus	Coprococcus sp000154245/sp900066115	b7d45b0b6f3269114421bbeef0aa7d10
4	Bacteria	Firmicutes_A	Clostridia	Lachnospirales	Lachnospiraceae	Coprococcus	Coprococcus eutactus_A	61ac3d9b44eb14eefe4564487d973461
1	Bacteria	Firmicutes_A	Clostridia	Lachnospirales	Lachnospiraceae	TF01-11	TF01-11 sp.	53ef3a384a44a1a1797714b078b9359e
4	Bacteria	Firmicutes_A	Clostridia	Lachnospirales	Lachnospiraceae	TF01-11	TF01-11 sp001414325	4a9e03e20cb0c6cae9d53ad3970e55e6
4	Bacteria	Firmicutes_A	Clostridia	Lachnospirales	Lachnospiraceae	TF01-11	TF01-11 sp.2	ff94ddb4f5fdf3dc26cf8705a79b551a
1	Bacteria	Firmicutes	Bacilli	Class_Bacilli	Class_Bacilli	Class_Bacilli	Class_Bacilli2	884ca44df7626ca79edc77871f39b53c
1	Bacteria	Firmicutes	Bacilli	Staphylococcales	Staphylococcaceae	Staphylococcus	Staphylococcus sp.	efb85d865f9c065eb953517a0f7161e9
1	Bacteria	Firmicutes	Bacilli	Staphylococcales	Staphylococcaceae	Staphylococcus	Staphylococcus sp.2	b9e91fed71472c212a039f92d103f04a
1	Bacteria	Firmicutes	Bacilli	Staphylococcales	Staphylococcaceae	Staphylococcus	Staphylococcus sp.3	01c397b844b2fb2f9550ea629cda5a0e
1	Bacteria	Firmicutes	Bacilli	Staphylococcales	Staphylococcaceae	Staphylococcus	Staphylococcus sp.4	a3d37c79d23b949a3dc740806c44a706
1	Bacteria	Firmicutes	Bacilli	Staphylococcales	Staphylococcaceae	Staphylococcus	Staphylococcus caeli/cohnii/edaphicus/nepalensis/pseudoxylosus/saprophyticus/succinus/urealyticus/xylosus/xylosus_A/xylosus_B	6bec5f45e3d2ac14fe04274172e6dbd5
1	Bacteria	Firmicutes	Bacilli	Staphylococcales	Salinicoccaceae	Jeotgalicoccus	Jeotgalicoccus marinus	a802188ba9f1a76c47d8058c368e8224
1	Bacteria	Firmicutes	Bacilli	Staphylococcales	Staphylococcaceae	Staphylococcus	Staphylococcus sp.5	8b9c3f246137cdf13fd3c3922489de6e
1	Bacteria	Firmicutes	Bacilli	Staphylococcales	Staphylococcaceae	Staphylococcus	Staphylococcus argenteus/aureus/capitis/caprae/croceilyticus/devriesei_A/epidermidis/haemolyticus/haemolyticus_A/hominis/lugdunensis/mediatlanticus/mesophila/pasteuri_A/petrasii_B/saccharolyticus/schweitzeri/simiae/sp002931555/sp007559425/warneri/warneri_A	cde00646e8aecf8aaac49a9bb9c96729
1	Bacteria	Firmicutes	Bacilli	Staphylococcales	Staphylococcaceae	Staphylococcus	Staphylococcus sp.6	bdec0fb21ab4972fc37e7ef528263d39
1	Bacteria	Firmicutes	Bacilli	Staphylococcales	Staphylococcaceae	Staphylococcus	Staphylococcus sp.7	8a708b7d22364ef01b63768cb3d65a47
1	Bacteria	Firmicutes	Bacilli	Staphylococcales	Staphylococcaceae	Staphylococcus	Staphylococcus sp.8	e24f35ab51a504af117bfbde340a02f5
1	Bacteria	Firmicutes	Bacilli	Staphylococcales	Staphylococcaceae	Staphylococcus	Staphylococcus sp.9	60b1bf30e8cd3fe2aef701c7a167a03d
1	Bacteria	Firmicutes	Bacilli	Staphylococcales	Staphylococcaceae	Staphylococcus	Staphylococcus sp.10	65a18ee9efcc93557dd1b085c76ea43d
1	Bacteria	Firmicutes	Bacilli	Staphylococcales	Staphylococcaceae	Staphylococcus	Staphylococcus sp.11	1b55ba38f8071eacbf09c33e1115d2ed
1	Bacteria	Firmicutes	Bacilli	Staphylococcales	Staphylococcaceae	Staphylococcus	Staphylococcus sp.12	cd3a6f183a1275c6156e36a881d53855
3	Bacteria	Verrucomicrobiota	Verrucomicrobiae	Verrucomicrobiales	Akkermansiaceae	Akkermansia	Akkermansia muciniphila	b6b05223adf86d071fd279f79dc2533c
1	Bacteria	Verrucomicrobiota	Verrucomicrobiae	Verrucomicrobiales	Akkermansiaceae	Akkermansia	Akkermansia sp.	593b619793ba73da4a015c080787d176
1	Bacteria	Verrucomicrobiota	Verrucomicrobiae	Verrucomicrobiales	Akkermansiaceae	Akkermansia	Akkermansia sp.2	9c70f993fbf3b404e3bdc13645ac8578
3	Bacteria	Verrucomicrobiota	Verrucomicrobiae	Verrucomicrobiales	Akkermansiaceae	Akkermansia	Akkermansia muciniphila_B	f89c4b187581cd6deccd6d0a67c39167
1	Bacteria	Verrucomicrobiota	Verrucomicrobiae	Verrucomicrobiales	Akkermansiaceae	Akkermansia	Akkermansia sp.3	6b1480b04a3cc3c5ece8fc4d5512a906
2	Bacteria	Verrucomicrobiota	Verrucomicrobiae	Verrucomicrobiales	Akkermansiaceae	Akkermansia	Akkermansia sp001580195/sp004167605	b1ddd314b05fcbfebcee69313d31e0cd
1	Bacteria	Firmicutes_A	Clostridia	Lachnospirales	Lachnospiraceae	Fusicatenibacter	Fusicatenibacter sp.	0bb1a99cb4e706e11aa409e2255c52a0
1	Bacteria	Firmicutes_A	Clostridia	Lachnospirales	Lachnospiraceae	Fusicatenibacter	Fusicatenibacter sp.2	4cf80433e63e23ac627eaeccffd7a61d
4	Bacteria	Firmicutes_A	Clostridia	Lachnospirales	Lachnospiraceae	Fusicatenibacter	Fusicatenibacter saccharivorans	8639874b1f9d7eaf752febcf6f7ca9dd
1	Bacteria	Firmicutes_A	Clostridia	Lachnospirales	Lachnospiraceae	Fusicatenibacter	Fusicatenibacter sp.3	3eefe68d24f184bf055f1c990b343719
1	Bacteria	Bacteroidota	Bacteroidia	Bacteroidales	Muribaculaceae	CAG-279	CAG-279 sp.	15e2a5cf1b75cc513e6962913fedfd70
1	Bacteria	Bacteroidota	Bacteroidia	Bacteroidales	Muribaculaceae	CAG-279	CAG-279 sp.2	a5d4500166a9dbdd931e6bd1f363f3ea
1	Bacteria	Bacteroidota	Bacteroidia	Bacteroidales	Muribaculaceae	CAG-279	CAG-279 sp.3	f7175dcfd11ec39cd25693bce35f6716
4	Bacteria	Bacteroidota	Bacteroidia	Bacteroidales	Rikenellaceae	Tidjanibacter	Tidjanibacter inops_A	990c6b345493c7289ea874698b608ce4
4	Bacteria	Bacteroidota	Bacteroidia	Bacteroidales	Rikenellaceae	Alistipes_A	Alistipes_A ihumii	db7fd180ad4498f13f0316b9e7cd6334
4	Bacteria	Bacteroidota	Bacteroidia	Bacteroidales	Rikenellaceae	Alistipes_A	Alistipes_A indistinctus	dbc5ca3058f2e74d6870bd92b3e4f360
4	Bacteria	Bacteroidota	Bacteroidia	Bacteroidales	Rikenellaceae	Alistipes_A	Alistipes_A sp900240235	d3bba37bff4cf4126f601565204e5b7f
3	Bacteria	Bacteroidota	Bacteroidia	Bacteroidales	Rikenellaceae	Alistipes	Alistipes onderdonkii	9676d0bf5f8468ad67ed9525f3320aee
1	Bacteria	Bacteroidota	Bacteroidia	Bacteroidales	Rikenellaceae	Alistipes	Alistipes sp.2	5653ed7c650907199c7ea94bc6adcfe9
1	Bacteria	Bacteroidota	Bacteroidia	Bacteroidales	Rikenellaceae	Alistipes	Alistipes dispar	03717059f3fd06146854b9a354308a58
1	Bacteria	Bacteroidota	Bacteroidia	Bacteroidales	Rikenellaceae	Alistipes	Alistipes sp.3	c58b62215a87d6c404cf87796cff9f9b
1	Bacteria	Bacteroidota	Bacteroidia	Bacteroidales	Rikenellaceae	Alistipes	Alistipes sp.4	fbe9a470efa875a716b4f8c9aa888d1e
1	Bacteria	Bacteroidota	Bacteroidia	Bacteroidales	Rikenellaceae	Alistipes	Alistipes sp.5	866ecde3249cce8e2f995015a3336944
4	Bacteria	Bacteroidota	Bacteroidia	Bacteroidales	Rikenellaceae	Alistipes	Alistipes senegalensis/timonensis	42ae400c986e05431ab7ba931956efd6
4	Bacteria	Bacteroidota	Bacteroidia	Bacteroidales	Rikenellaceae	Alistipes	Alistipes sp.6	8dcacbf5f66042cbb4ae37a299e949c4
4	Bacteria	Bacteroidota	Bacteroidia	Bacteroidales	Rikenellaceae	Alistipes	Alistipes shahii	0e4d9e1e25ed95591ff237535a51973d
4	Bacteria	Bacteroidota	Bacteroidia	Bacteroidales	Rikenellaceae	Alistipes	Alistipes finegoldii	d0f645df3d7e1695f903478dabd44e28
1	Bacteria	Bacteroidota	Bacteroidia	Bacteroidales	Rikenellaceae	Alistipes	Alistipes sp.7	3373fb8d4ef8e42ae19d177ea5659820
1	Bacteria	Bacteroidota	Bacteroidia	Bacteroidales	Rikenellaceae	Alistipes	Alistipes sp.8	dfcfd4febc5c92b2ad00f9b54c748a62
4	Bacteria	Bacteroidota	Bacteroidia	Bacteroidales	Rikenellaceae	Alistipes	Alistipes putredinis/sp900551515	5a73d3e352fba86f667f5a6fc5ac90ba
4	Bacteria	Bacteroidota	Bacteroidia	Bacteroidales	Rikenellaceae	Alistipes	Alistipes communis	af958d80672a6516b14b8705db27abc2
1	Bacteria	Bacteroidota	Bacteroidia	Bacteroidales	Bacteroidaceae	CAG-462	CAG-462 sp900291465	e2d158501c863c9c11a7a80ae632eb76
1	Bacteria	Bacteroidota	Bacteroidia	Bacteroidales	Bacteroidaceae	Phocaeicola	Phocaeicola sp.	50114d59c4fcd0c47c3f2e71d94f061d
1	Bacteria	Bacteroidota	Bacteroidia	Bacteroidales	Bacteroidaceae	Phocaeicola	Phocaeicola sp002161765	ef10ee072161e24a309febec30705208
2	Bacteria	Bacteroidota	Bacteroidia	Bacteroidales	Bacteroidaceae	Phocaeicola	Phocaeicola plebeius_A	a4ac1cd75e12a7e924dd49b96366a5df
1	Bacteria	Bacteroidota	Bacteroidia	Bacteroidales	Bacteroidaceae	Phocaeicola	Phocaeicola sp.2	8cf513afd533f6b5a8feb898b437866c
1	Bacteria	Bacteroidota	Bacteroidia	Bacteroidales	Bacteroidaceae	Phocaeicola	Phocaeicola sp.3	9db953bf528654eca146155d7bfd2b69
2	Bacteria	Bacteroidota	Bacteroidia	Bacteroidales	Bacteroidaceae	Phocaeicola	Phocaeicola plebeius	cf091e8d731ea6652171bddebd0f9f30
1	Bacteria	Bacteroidota	Bacteroidia	Bacteroidales	Bacteroidaceae	Phocaeicola	Phocaeicola coprophilus	29ba3739c902db233346af94f55e320d
1	Bacteria	Bacteroidota	Bacteroidia	Bacteroidales	Bacteroidaceae	Phocaeicola	Phocaeicola sp.4	7588c08ca48cef8dc9d7167d1ede24ec
1	Bacteria	Bacteroidota	Bacteroidia	Bacteroidales	Bacteroidaceae	Phocaeicola	Phocaeicola sp.5	c3f07566db76852e77ee69f7034e7486
1	Bacteria	Bacteroidota	Bacteroidia	Bacteroidales	Bacteroidaceae	Phocaeicola	Phocaeicola mediterraneensis	311005342659d3a5c04cd27144ef21ad
1	Bacteria	Bacteroidota	Bacteroidia	Bacteroidales	Bacteroidaceae	Phocaeicola	Phocaeicola sp.6	49586b734d3a8225936901e6534bc91e
1	Bacteria	Bacteroidota	Bacteroidia	Bacteroidales	Bacteroidaceae	Phocaeicola	Phocaeicola sp.7	7a003e5febc8421af6518ae6db8a8b98
1	Bacteria	Bacteroidota	Bacteroidia	Bacteroidales	Bacteroidaceae	Phocaeicola	Phocaeicola sp.8	3adaaf84cdb05004ff2a7ed1c3abe881
1	Bacteria	Bacteroidota	Bacteroidia	Bacteroidales	Bacteroidaceae	Phocaeicola	Phocaeicola sp.9	d290357b0fd2d5a16083231e2bb07407
1	Bacteria	Bacteroidota	Bacteroidia	Bacteroidales	Bacteroidaceae	Phocaeicola	Phocaeicola sp.10	c6bc7d2590b80fc9bd2a1e8cc2e502db
1	Bacteria	Bacteroidota	Bacteroidia	Bacteroidales	Bacteroidaceae	Phocaeicola	Phocaeicola sp.11	df14ad7818a580531a2c18ae1e37c7d9
4	Bacteria	Bacteroidota	Bacteroidia	Bacteroidales	Bacteroidaceae	Phocaeicola	Phocaeicola coprocola	fa979e05c93a95abad8b12860230238d
1	Bacteria	Bacteroidota	Bacteroidia	Bacteroidales	Bacteroidaceae	Bacteroides	Bacteroides sp.	561dca5d5fbb1032ce8eb376b90c867b
1	Bacteria	Bacteroidota	Bacteroidia	Bacteroidales	Bacteroidaceae	Bacteroides	Bacteroides togonis	c48bc7f59a0019172bf501d0b6d60b88
1	Bacteria	Bacteroidota	Bacteroidia	Bacteroidales	Bacteroidaceae	Bacteroides	Bacteroides sp.2	08ebf8ebcd399cae9a4bed0ea2720970
3	Bacteria	Bacteroidota	Bacteroidia	Bacteroidales	Bacteroidaceae	Bacteroides	Bacteroides stercoris	1dd6007765d82475842e942fad29bcea
1	Bacteria	Bacteroidota	Bacteroidia	Bacteroidales	Bacteroidaceae	Bacteroides	Bacteroides sp.3	e907f2d64bf365b09b83b79e7b96bef7
1	Bacteria	Bacteroidota	Bacteroidia	Bacteroidales	Bacteroidaceae	Bacteroides	Bacteroides sp.4	2a831740bc5331086f9eef2df9097132
1	Bacteria	Bacteroidota	Bacteroidia	Bacteroidales	Bacteroidaceae	Bacteroides	Bacteroides rodentium	90a9a96826cc47237b4b67fb49844f7f
1	Bacteria	Bacteroidota	Bacteroidia	Bacteroidales	Bacteroidaceae	Bacteroides	Bacteroides sp.5	c7ca61385d0198be988c60797530ddb3
1	Bacteria	Bacteroidota	Bacteroidia	Bacteroidales	Bacteroidaceae	Bacteroides	Bacteroides sp.6	2f8165c6c39936db6ec28764cc316d92
1	Bacteria	Bacteroidota	Bacteroidia	Bacteroidales	Bacteroidaceae	Bacteroides	Bacteroides sp.7	c9fc347dc169d60396bddfa34a005c4e
3	Bacteria	Bacteroidota	Bacteroidia	Bacteroidales	Bacteroidaceae	Bacteroides	Bacteroides sp.8	d44ac2ef51574f366f2223bb95cde111
1	Bacteria	Bacteroidota	Bacteroidia	Bacteroidales	Bacteroidaceae	Bacteroides	Bacteroides sp.9	8e0e3c4f767e2423819640b13ada8f49
1	Bacteria	Bacteroidota	Bacteroidia	Bacteroidales	Bacteroidaceae	Bacteroides	Bacteroides sp.10	0de5d549d794f78951409506a638424d
1	Bacteria	Bacteroidota	Bacteroidia	Bacteroidales	Bacteroidaceae	Bacteroides	Bacteroides ndongoniae	ea3ad7934282d1853309d6efdf713916
3	Bacteria	Bacteroidota	Bacteroidia	Bacteroidales	Bacteroidaceae	Bacteroides	Bacteroides uniformis	9047da471d62ea70f8c27bc4a974cf85
1	Bacteria	Bacteroidota	Bacteroidia	Bacteroidales	Bacteroidaceae	Bacteroides	Bacteroides sp.11	2fed3a5b3faae3f0f0a5ff8ca0d0bc08
1	Bacteria	Bacteroidota	Bacteroidia	Bacteroidales	Bacteroidaceae	Bacteroides	Bacteroides intestinalis_A	6d12b9c8bd4b37e025faf929f9f6b961
1	Bacteria	Bacteroidota	Bacteroidia	Bacteroidales	Bacteroidaceae	Bacteroides	Bacteroides oleiciplenus/sp900556215/stercorirosoris	6f0f7e404173eac7e0dfe7929ecd6691
1	Bacteria	Bacteroidota	Bacteroidia	Bacteroidales	Bacteroidaceae	Bacteroides	Bacteroides sp.12	a425c9f6dd656bb2cfd45f195aaadd30
1	Bacteria	Bacteroidota	Bacteroidia	Bacteroidales	Bacteroidaceae	Bacteroides	Bacteroides sp.13	ade9689439e54ead7e89a2a86b7968f2
4	Bacteria	Bacteroidota	Bacteroidia	Bacteroidales	Bacteroidaceae	Bacteroides	Bacteroides eggerthii	c1cb63a49b75a357d6fa0766f159baa3
1	Bacteria	Bacteroidota	Bacteroidia	Bacteroidales	Bacteroidaceae	Bacteroides	Bacteroides sp.14	9b2d57d9e83b74908ff6655c66cf5e61
3	Bacteria	Bacteroidota	Bacteroidia	Bacteroidales	Bacteroidaceae	Bacteroides	Bacteroides caccae	c427fef367391ce29bf5232400ab04d8
1	Bacteria	Bacteroidota	Bacteroidia	Bacteroidales	Bacteroidaceae	Bacteroides	Bacteroides sp.15	77bd625e8f4c2c61c73eec97d02f5a7b
1	Bacteria	Proteobacteria	Gammaproteobacteria	Pseudomonadales	Moraxellaceae	Acinetobacter	Acinetobacter sp008017315	8d1432e4ed4786219a9635760e18b782
1	Bacteria	Bacteroidota	Bacteroidia	Bacteroidales	Bacteroidaceae	Bacteroides	Bacteroides sp003545565	3f3ba93fa38cf232f1de8649d8469f8d
1	Bacteria	Bacteroidota	Bacteroidia	Bacteroidales	Bacteroidaceae	Bacteroides	Bacteroides clarus	cceb8bd4c48dbbc2e0a83eb892990a22
1	Bacteria	Bacteroidota	Bacteroidia	Bacteroidales	Bacteroidaceae	Bacteroides	Bacteroides sp.16	932f4e310f26643484b5e4b801215122
1	Bacteria	Bacteroidota	Bacteroidia	Bacteroidales	Bacteroidaceae	Bacteroides	Bacteroides sp.17	1c8b2a408ce01053ff19cefa43f96c30
1	Bacteria	Bacteroidota	Bacteroidia	Bacteroidales	Bacteroidaceae	Bacteroides	Bacteroides salyersiae	c19d95b7ff49b82b075125eab529fcad
1	Bacteria	Bacteroidota	Bacteroidia	Bacteroidales	Bacteroidaceae	Bacteroides	Bacteroides nordii	bc53530ff0264802f44a0d5297fb2567
1	Bacteria	Bacteroidota	Bacteroidia	Bacteroidales	Bacteroidaceae	Bacteroides	Bacteroides sp.18	c5b61c836048fe482639c996c5912f71
1	Bacteria	Bacteroidota	Bacteroidia	Bacteroidales	Bacteroidaceae	Bacteroides	Bacteroides sp.19	3518f6d51ad3b3ab2feed9d3d8aa0f2c
1	Bacteria	Bacteroidota	Bacteroidia	Bacteroidales	Bacteroidaceae	Bacteroides	Bacteroides sp.20	9c37ad9dcae5425c85563aafd434f913
1	Bacteria	Bacteroidota	Bacteroidia	Bacteroidales	Bacteroidaceae	Bacteroides	Bacteroides sp.21	2cd245a26deb337b5d280890a4a52a75
1	Bacteria	Bacteroidota	Bacteroidia	Bacteroidales	Bacteroidaceae	Bacteroides	Bacteroides sp.22	e796194e0bb4d11763f64d81b61d323a
1	Bacteria	Firmicutes_A	Clostridia	Lachnospirales	Lachnospiraceae	Schaedlerella	Schaedlerella sp.	8e8392f22984596df4e8a921d09b2edb
2	Bacteria	Bacteroidota	Bacteroidia	Bacteroidales	Bacteroidaceae	Bacteroides	Bacteroides fragilis/fragilis_A	d20d3658de331c939f54d8acaed7c4c1
1	Bacteria	Bacteroidota	Bacteroidia	Bacteroidales	Bacteroidaceae	Bacteroides	Bacteroides sp.23	5bbd7e5c4560638fa02325b43a29bf6c
1	Bacteria	Bacteroidota	Bacteroidia	Bacteroidales	Bacteroidaceae	Bacteroides	Bacteroides sp.24	ed5daa2810f18f302c757ac15c59e53e
2	Bacteria	Bacteroidota	Bacteroidia	Bacteroidales	Bacteroidaceae	Bacteroides	Bacteroides sp.25	ddec10faae3102ee2d47a8690518404c
3	Bacteria	Bacteroidota	Bacteroidia	Bacteroidales	Bacteroidaceae	Bacteroides	Bacteroides faecichinchillae/faecis/sp900066265/thetaiotaomicron	39f24cb6c029d39972402b8ad2dc95df
1	Bacteria	Bacteroidota	Bacteroidia	Bacteroidales	Bacteroidaceae	Bacteroides	Bacteroides sp.26	bcf29e2f04dc36cabb7639ca638e7b10
1	Bacteria	Bacteroidota	Bacteroidia	Bacteroidales	Bacteroidaceae	Bacteroides	Bacteroides sp.27	2fd0a6b235e1417555cba55a7af215a0
1	Bacteria	Bacteroidota	Bacteroidia	Bacteroidales	Bacteroidaceae	Bacteroides	Bacteroides caecimuris	f7bf953675cf6b46eeee45feb44f0081
1	Bacteria	Bacteroidota	Bacteroidia	Bacteroidales	Bacteroidaceae	Bacteroides	Bacteroides sp.28	6a31b8a792d0e0bc241a19462405a7f2
1	Bacteria	Bacteroidota	Bacteroidia	Bacteroidales	Bacteroidaceae	Bacteroides	Bacteroides sp.29	0a67bda2cc67ede5c600f560a1651545
1	Bacteria	Bacteroidota	Bacteroidia	Bacteroidales	Bacteroidaceae	Bacteroides	Bacteroides sp.30	a786c573bbf2ef11e89aeb80da43f007
1	Bacteria	Bacteroidota	Bacteroidia	Bacteroidales	Bacteroidaceae	Bacteroides	Bacteroides sp.31	ecac95da797dd635e3490a8ae56c655f
3	Bacteria	Bacteroidota	Bacteroidia	Bacteroidales	Bacteroidaceae	Bacteroides	Bacteroides sp902362375	068f1cecfbb94dc0fa666397f60182fe
3	Bacteria	Bacteroidota	Bacteroidia	Bacteroidales	Bacteroidaceae	Bacteroides	Bacteroides sp.32	f812f0b82d1d72425b8f570e126f7734
1	Bacteria	Bacteroidota	Bacteroidia	Bacteroidales	Bacteroidaceae	Bacteroides	Bacteroides sp.33	cc2f49468608e0a509efd3193d59886b
3	Bacteria	Bacteroidota	Bacteroidia	Bacteroidales	Bacteroidaceae	Bacteroides	Bacteroides ovatus/sp003463205	76fe68bcdc6fcd1c62e29e46799161a0
1	Bacteria	Bacteroidota	Bacteroidia	Bacteroidales	Bacteroidaceae	Bacteroides	Bacteroides sp.34	9bf4bd9261a10b353ef1f8725122be5d
1	Bacteria	Bacteroidota	Bacteroidia	Bacteroidales	Bacteroidaceae	Bacteroides	Bacteroides sp.35	df14d983733d22eb0b0709465e25c792
1	Bacteria	Bacteroidota	Bacteroidia	Bacteroidales	Bacteroidaceae	Bacteroides	Bacteroides sp.36	d6e4471721690bac814f38492c56ac0b
1	Bacteria	Bacteroidota	Bacteroidia	Bacteroidales	Bacteroidaceae	Bacteroides	Bacteroides sp.37	8180b0c609c772a85a2a1d7e671ad752
1	Bacteria	Bacteroidota	Bacteroidia	Bacteroidales	Bacteroidaceae	Bacteroides	Bacteroides sp.38	86d76141e4b9fda01712c0927fc6fbe2
1	Bacteria	Bacteroidota	Bacteroidia	Bacteroidales	Bacteroidaceae	Bacteroides	Bacteroides sp012113595	09d1bccf3a47b07cfab0511bc7e69b18
1	Bacteria	Bacteroidota	Bacteroidia	Bacteroidales	Bacteroidaceae	Bacteroides	Bacteroides sp.39	d841636255c4d388e75ba0f31d1d8747
1	Bacteria	Bacteroidota	Bacteroidia	Bacteroidales	Bacteroidaceae	Bacteroides	Bacteroides sp.40	582d2e5e4f5ad881f893f5e73c29ff4f
3	Bacteria	Bacteroidota	Bacteroidia	Bacteroidales	Bacteroidaceae	Bacteroides	Bacteroides sp.41	34e7c954d8283932eb645e8c04e98ca0
4	Bacteria	Bacteroidota	Bacteroidia	Bacteroidales	Bacteroidaceae	Bacteroides	Bacteroides finegoldii	c960bd896fffc971d0eda005d3ec8cb2
1	Bacteria	Bacteroidota	Bacteroidia	Bacteroidales	Bacteroidaceae	Phocaeicola	Phocaeicola sp.12	0ed6739736c432995bf0d75452315b2f
3	Bacteria	Bacteroidota	Bacteroidia	Bacteroidales	Bacteroidaceae	Phocaeicola	Phocaeicola massiliensis	42dbd49bd31b5a5069d55d3d2231513b
1	Bacteria	Bacteroidota	Bacteroidia	Bacteroidales	Bacteroidaceae	Phocaeicola	Phocaeicola sp.13	f0165f73a8bb76d66f47cb82ff1cd369
1	Bacteria	Bacteroidota	Bacteroidia	Bacteroidales	Bacteroidaceae	Phocaeicola	Phocaeicola sp.14	a0ad1d26b78ffc320b92c2fc0a44d730
1	Bacteria	Bacteroidota	Bacteroidia	Bacteroidales	Bacteroidaceae	Phocaeicola	Phocaeicola sp.15	782e87274bc424080626c28d3151f370
1	Bacteria	Bacteroidota	Bacteroidia	Bacteroidales	Bacteroidaceae	Phocaeicola	Phocaeicola sp.16	73149531a5afc4626fa3ed9c61335512
1	Bacteria	Bacteroidota	Bacteroidia	Bacteroidales	Bacteroidaceae	Phocaeicola	Phocaeicola sp.17	5cea774e6a6fc2b459c324708ac5a938
1	Bacteria	Bacteroidota	Bacteroidia	Bacteroidales	Bacteroidaceae	Phocaeicola	Phocaeicola sp.18	d92a16cf177789ca36d11814100f374e
4	Bacteria	Bacteroidota	Bacteroidia	Bacteroidales	Bacteroidaceae	Phocaeicola	Phocaeicola vulgatus	8f35a74b040125a5649a42ec632b298a
1	Bacteria	Bacteroidota	Bacteroidia	Bacteroidales	Bacteroidaceae	Phocaeicola	Phocaeicola sp.19	46319cf100935d299e30f57e31758d09
1	Bacteria	Bacteroidota	Bacteroidia	Bacteroidales	Bacteroidaceae	Phocaeicola	Phocaeicola sp.20	0b547fcdb55bc7bc5d1e34db45f3aac4
1	Bacteria	Bacteroidota	Bacteroidia	Bacteroidales	Bacteroidaceae	Phocaeicola	Phocaeicola sp.21	31add7003aa1d7efff7ce8c438e47b94
3	Bacteria	Bacteroidota	Bacteroidia	Bacteroidales	Bacteroidaceae	Phocaeicola	Phocaeicola sp.22	8c3ff6c4c4b125d5e72f5276d57be4d0
1	Bacteria	Bacteroidota	Bacteroidia	Bacteroidales	Bacteroidaceae	Phocaeicola	Phocaeicola sp.23	fa28af337f8ea76217c3b27ebc1674d1
1	Bacteria	Bacteroidota	Bacteroidia	Bacteroidales	Bacteroidaceae	Phocaeicola	Phocaeicola sp.24	81e9299d21a647debbb325cf64dd9b02
1	Bacteria	Bacteroidota	Bacteroidia	Bacteroidales	Bacteroidaceae	Phocaeicola	Phocaeicola sp.25	0ce116a2c3dcb63a049920628fe4c218
1	Bacteria	Bacteroidota	Bacteroidia	Bacteroidales	Bacteroidaceae	Phocaeicola	Phocaeicola sp.26	76fe77e4ef1673efbaa3c67e0b7a3b23
1	Bacteria	Bacteroidota	Bacteroidia	Bacteroidales	Bacteroidaceae	Phocaeicola	Phocaeicola sp.27	4e8a4ce513742648402744ed8a9799f9
3	Bacteria	Bacteroidota	Bacteroidia	Bacteroidales	Bacteroidaceae	Phocaeicola	Phocaeicola sp.28	7ab0b262ab800e578b81f2d9c958b91b
1	Bacteria	Bacteroidota	Bacteroidia	Bacteroidales	Bacteroidaceae	Phocaeicola	Phocaeicola sp.29	a31aea2837359c672b3d8b210856279b
1	Bacteria	Bacteroidota	Bacteroidia	Bacteroidales	Bacteroidaceae	Phocaeicola	Phocaeicola sp.30	bfcf55026dc3cafcd1b71aa02a431e80
1	Bacteria	Bacteroidota	Bacteroidia	Bacteroidales	Bacteroidaceae	Phocaeicola	Phocaeicola sp.31	911ab70ba56f25592c733fdb39c21112
1	Bacteria	Bacteroidota	Bacteroidia	Bacteroidales	Bacteroidaceae	Phocaeicola	Phocaeicola sp.32	e3bba5792e407a0d3140cafeee5e0fe5
1	Bacteria	Bacteroidota	Bacteroidia	Bacteroidales	Bacteroidaceae	Phocaeicola	Phocaeicola sp.33	6e0250b43fc7f0f8a156a93818dcced7
1	Bacteria	Bacteroidota	Bacteroidia	Bacteroidales	Bacteroidaceae	Phocaeicola	Phocaeicola sp.34	eb2a32f40f7a929b25c16e8bd91643b0
1	Bacteria	Bacteroidota	Bacteroidia	Bacteroidales	Bacteroidaceae	Phocaeicola	Phocaeicola sp.35	b29f1cda80b4bb4a3371c98b8fd5f8b5
3	Bacteria	Bacteroidota	Bacteroidia	Bacteroidales	Bacteroidaceae	Phocaeicola	Phocaeicola dorei	7078a2866c4a4b71fcc6ed7779369c8d
1	Bacteria	Bacteroidota	Bacteroidia	Bacteroidales	Bacteroidaceae	Bacteroides	Bacteroides reticulotermitis	e271691c1cfdcc952c42f4dc88ee664f
3	Bacteria	Bacteroidota	Bacteroidia	Bacteroidales	Bacteroidaceae	Bacteroides	Bacteroides cellulosilyticus	7f8097726bac2d985cdd141dac736571
1	Bacteria	Bacteroidota	Bacteroidia	Bacteroidales	Bacteroidaceae	Bacteroides	Bacteroides sp.42	8a74920499949cd1084ba15a28e083a4
1	Bacteria	Bacteroidota	Bacteroidia	Bacteroidales	Bacteroidaceae	Bacteroides	Bacteroides sp.43	7f9e8df2049c4956ea671f6018565a75
1	Bacteria	Bacteroidota	Bacteroidia	Bacteroidales	Bacteroidaceae	Bacteroides	Bacteroides intestinalis	4c043695c603cedc068ab312a6c103db
4	Bacteria	Bacteroidota	Bacteroidia	Bacteroidales	Bacteroidaceae	Family_Bacteroidaceae	Family_Bacteroidaceae	feea23e3d913f7f737786c4b8ddcacba
1	Bacteria	Bacteroidota	Bacteroidia	Bacteroidales	Bacteroidaceae	Paraprevotella	Paraprevotella xylaniphila	f5e7bc615a255676a1dfbf67d59ca90f
1	Bacteria	Bacteroidota	Bacteroidia	Bacteroidales	Bacteroidaceae	Family_Bacteroidaceae	Family_Bacteroidaceae2	85e8d80510fed98f69fcbaaad0ac7c1f
2	Bacteria	Bacteroidota	Bacteroidia	Bacteroidales	Bacteroidaceae	Paraprevotella	Paraprevotella sp.2	4821047d7733b3ac621af5f734d71a09
1	Bacteria	Bacteroidota	Bacteroidia	Bacteroidales	Bacteroidaceae	Paraprevotella	Paraprevotella sp.3	fcad79d41cb3452f4d3d0aaabdbb73d1
1	Bacteria	Bacteroidota	Bacteroidia	Bacteroidales	Bacteroidaceae	Paraprevotella	Paraprevotella sp.4	aaae9bc427198ee7056c14c8231acca6
4	Bacteria	Bacteroidota	Bacteroidia	Bacteroidales	Bacteroidaceae	Paraprevotella	Paraprevotella sp.5	be94a4fbff4738021d8c9b38d220f36e
1	Bacteria	Bacteroidota	Bacteroidia	Bacteroidales	Bacteroidaceae	Prevotellamassilia	Prevotellamassilia sp.	abc1286ababca6477d5907ad11e6a81b
1	Bacteria	Bacteroidota	Bacteroidia	Bacteroidales	Bacteroidaceae	Prevotellamassilia	Prevotellamassilia timonensis	ce2ff41687dd2dba70e54b7518c779ee
1	Bacteria	Bacteroidota	Bacteroidia	Bacteroidales	Bacteroidaceae	Family_Bacteroidaceae	Family_Bacteroidaceae3	2709e9826e04340d2b0c58380e56aa47
1	Bacteria	Bacteroidota	Bacteroidia	Bacteroidales	Bacteroidaceae	Alloprevotella	Alloprevotella sp.	8a9f9814278842be5d4fc53225b267ca
1	Bacteria	Bacteroidota	Bacteroidia	Bacteroidales	Bacteroidaceae	UBA4372	UBA4372 sp.	ff4e68a4b99a1dfae21c14c047eaa536
1	Bacteria	Bacteroidota	Bacteroidia	Bacteroidales	Bacteroidaceae	Prevotella	Prevotella sp.4	064a79d3faefea0b753d20b4a1431852
1	Bacteria	Bacteroidota	Bacteroidia	Bacteroidales	Bacteroidaceae	Prevotella	Prevotella sp.5	aa3947dfe1362f29a20e4f50499158d7
1	Bacteria	Bacteroidota	Bacteroidia	Bacteroidales	Bacteroidaceae	Prevotella	Prevotella sp.6	c40d4f76de74d9f4b151d95408f93397
1	Bacteria	Bacteroidota	Bacteroidia	Bacteroidales	Bacteroidaceae	Prevotella	Prevotella sp.7	95b6cd6d224218f0d2b02bc5a903d9e8
1	Bacteria	Bacteroidota	Bacteroidia	Bacteroidales	Bacteroidaceae	Prevotella	Prevotella sp.8	54896b385d203bcc6462ddd9452dc6ff
1	Bacteria	Bacteroidota	Bacteroidia	Bacteroidales	Bacteroidaceae	Prevotella	Prevotella hominis	94f04281ebc96f356b21efcb4561bac3
1	Bacteria	Bacteroidota	Bacteroidia	Bacteroidales	Bacteroidaceae	Prevotella	Prevotella sp.9	02e07a5276e73839928f97d941e11899
2	Bacteria	Bacteroidota	Bacteroidia	Bacteroidales	Bacteroidaceae	Prevotella	Prevotella sp.10	4a5508dd7b0765955f25da84ac7ec55a
1	Bacteria	Bacteroidota	Bacteroidia	Bacteroidales	Bacteroidaceae	Prevotella	Prevotella sp900313215	8c1343ddab9198b4ad16281b835fcba2
1	Bacteria	Bacteroidota	Bacteroidia	Bacteroidales	Bacteroidaceae	Prevotella	Prevotella sp.11	3a7fd0f451af34b03abfa4e97924c717
1	Bacteria	Bacteroidota	Bacteroidia	Bacteroidales	Bacteroidaceae	Prevotella	Prevotella sp.12	0b67f7f7c75436a1231ca94577a68650
3	Bacteria	Bacteroidota	Bacteroidia	Bacteroidales	Bacteroidaceae	Prevotella	Prevotella sp900546535	333fc718c6bccdbf0fd4e4f84d0dd38e
1	Bacteria	Bacteroidota	Bacteroidia	Bacteroidales	Bacteroidaceae	Prevotella	Prevotella sp.13	ee3ebdcdae57dbaddca9514cbad58b0e
1	Bacteria	Bacteroidota	Bacteroidia	Bacteroidales	Bacteroidaceae	Prevotella	Prevotella sp.14	583a1adb709425f23db13238d6032181
1	Bacteria	Bacteroidota	Bacteroidia	Bacteroidales	Bacteroidaceae	Prevotella	Prevotella sp.15	06f116195570085cb8ea72353fbdeb0c
1	Bacteria	Bacteroidota	Bacteroidia	Bacteroidales	Bacteroidaceae	Prevotella	Prevotella sp.16	c4678f089191acb9d30f41fabd41d32f
1	Bacteria	Bacteroidota	Bacteroidia	Bacteroidales	Bacteroidaceae	Prevotella	Prevotella sp.17	fbaede910848478878c79b789fb82a91
1	Bacteria	Bacteroidota	Bacteroidia	Bacteroidales	Bacteroidaceae	Prevotella	Prevotella sp.18	c94362344e66ee5cae105bbc05cb0142
1	Bacteria	Bacteroidota	Bacteroidia	Bacteroidales	Bacteroidaceae	Prevotella	Prevotella sp.19	936640833577a6754ba3fbf81cfb46c8
1	Bacteria	Bacteroidota	Bacteroidia	Bacteroidales	Bacteroidaceae	Prevotella	Prevotella sp.20	a81c0b48b67c7b7ffbb424e74a7abc18
1	Bacteria	Bacteroidota	Bacteroidia	Bacteroidales	Bacteroidaceae	Prevotella	Prevotella sp.21	6bda483e79b2b7aee7191605a2beb9e0
1	Bacteria	Bacteroidota	Bacteroidia	Bacteroidales	Bacteroidaceae	Prevotella	Prevotella sp.22	d184ec3289a22c1fb2ec32e4b164fdaf
1	Bacteria	Bacteroidota	Bacteroidia	Bacteroidales	Bacteroidaceae	Prevotella	Prevotella sp.23	8384653e13207e30cb0b418342b779f2
1	Bacteria	Bacteroidota	Bacteroidia	Bacteroidales	Bacteroidaceae	Prevotella	Prevotella sp.24	1aab362f82a01ba08194ff4316817810
1	Bacteria	Bacteroidota	Bacteroidia	Bacteroidales	Bacteroidaceae	Prevotella	Prevotella sp.25	c8a129e6516ed94ab44e06af82992d8f
1	Bacteria	Bacteroidota	Bacteroidia	Bacteroidales	Bacteroidaceae	Prevotella	Prevotella sp.26	20f27a8cf385053636eabedf572060c7
3	Bacteria	Bacteroidota	Bacteroidia	Bacteroidales	Bacteroidaceae	Prevotella	Prevotella copri_A	76facbc79d48074efcde7a17c317a826
1	Bacteria	Bacteroidota	Bacteroidia	Bacteroidales	Bacteroidaceae	Prevotella	Prevotella sp.27	3cfbb40ca900851c415499f8c6848511
1	Bacteria	Bacteroidota	Bacteroidia	Bacteroidales	Bacteroidaceae	Prevotella	Prevotella sp.28	b9569ab5cb9f2e1d5e6db2b3cef1a7ec
1	Bacteria	Bacteroidota	Bacteroidia	Bacteroidales	Bacteroidaceae	Prevotella	Prevotella sp.29	25e00e4454a66e41acc6d670e1404534
1	Bacteria	Bacteroidota	Bacteroidia	Bacteroidales	Bacteroidaceae	Prevotella	Prevotella sp.30	885aba650cb607df941839e10ca118e0
1	Bacteria	Bacteroidota	Bacteroidia	Bacteroidales	Bacteroidaceae	Prevotella	Prevotella sp.31	981e0456c36e16898d9567fac4a67c95
1	Bacteria	Bacteroidota	Bacteroidia	Bacteroidales	Bacteroidaceae	Prevotella	Prevotella sp.32	f9b8bc4ff45aa3b1135a191fe87b7266
1	Bacteria	Bacteroidota	Bacteroidia	Bacteroidales	Bacteroidaceae	Prevotella	Prevotella sp.33	28859605ac73ac1149473a39d9cea40b
3	Bacteria	Bacteroidota	Bacteroidia	Bacteroidales	Bacteroidaceae	Prevotella	Prevotella sp.34	596fab78e9a33d8ce2aa0b2e8186da73
1	Bacteria	Bacteroidota	Bacteroidia	Bacteroidales	Bacteroidaceae	Prevotella	Prevotella sp.35	4d0f7f28d0a991ceb0c4bc9eb123ff44
1	Bacteria	Bacteroidota	Bacteroidia	Bacteroidales	Bacteroidaceae	Prevotella	Prevotella sp.36	0069a3ebb418d32ef0bf0f2ec60acd2f
1	Bacteria	Bacteroidota	Bacteroidia	Bacteroidales	Bacteroidaceae	Prevotella	Prevotella sp.37	1f97049ad38c38cea578a8ab22e282cc
1	Bacteria	Bacteroidota	Bacteroidia	Bacteroidales	Bacteroidaceae	Prevotella	Prevotella sp.38	6dd3ba4c8eb4390ea51281a030bfc3aa
1	Bacteria	Bacteroidota	Bacteroidia	Bacteroidales	Bacteroidaceae	Prevotella	Prevotella sp.39	2d39af493df8a866d24310113f0a57b3
1	Bacteria	Bacteroidota	Bacteroidia	Bacteroidales	Bacteroidaceae	Prevotella	Prevotella lascolaii	85982697b58230e3d08437b015f711b8
4	Bacteria	Bacteroidota	Bacteroidia	Bacteroidales	Bacteroidaceae	Prevotella	Prevotella buccalis	ead0f7ec85bd77bd4946c7566be10895
1	Bacteria	Bacteroidota	Bacteroidia	Bacteroidales	Bacteroidaceae	Prevotella	Prevotella timonensis_A	6fc334e897e5ada6a360dd2bef0c3eab
1	Bacteria	Bacteroidota	Bacteroidia	Bacteroidales	Bacteroidaceae	Prevotella	Prevotella sp.40	6adea2ae214fa37f93202c14753ad639
1	Bacteria	Bacteroidota	Bacteroidia	Bacteroidales	Bacteroidaceae	Prevotella	Prevotella sp.41	8d4def314cdb92643d39ee77e4c0d61c
1	Bacteria	Bacteroidota	Bacteroidia	Bacteroidales	Bacteroidaceae	Prevotella	Prevotella sp.42	e7e122d25c11c7fe71eff8eae844459f
1	Bacteria	Bacteroidota	Bacteroidia	Bacteroidales	Bacteroidaceae	Prevotella	Prevotella sp.43	e71efdd175fcd312d3a5829e7c89edc8
1	Bacteria	Bacteroidota	Bacteroidia	Bacteroidales	Bacteroidaceae	Prevotella	Prevotella sp.44	3dcf77220ab7658e18912714020b11af
1	Bacteria	Bacteroidota	Bacteroidia	Bacteroidales	Bacteroidaceae	Prevotella	Prevotella sp.45	cbefcee18e755cc9c60b2cc61654e8ba
1	Bacteria	Bacteroidota	Bacteroidia	Bacteroidales	Bacteroidaceae	Prevotella	Prevotella sp.46	7d83c3ec38d8e1d40f96e12005bc2a34
1	Bacteria	Bacteroidota	Bacteroidia	Bacteroidales	Bacteroidaceae	Prevotella	Prevotella sp.47	74fdff9a0003cdb387c4f0b364f100ba
2	Bacteria	Bacteroidota	Bacteroidia	Bacteroidales	Dysgonomonadaceae	Dysgonomonas	Dysgonomonas mossii/sp900079735	755d9d3409c940d525af2dd6f8a18b1f
1	Bacteria	Bacteroidota	Bacteroidia	Bacteroidales	Coprobacteraceae	Coprobacter	Coprobacter fastidiosus	32a9cfae6046ad517682fcf2a274b4dd
4	Bacteria	Bacteroidota	Bacteroidia	Bacteroidales	Porphyromonadaceae	Porphyromonas	Porphyromonas asaccharolytica/sp900539155/sp900539765	196dbc4d21f836a3464337d61345be0a
1	Bacteria	Bacteroidota	Bacteroidia	Bacteroidales	Porphyromonadaceae	Porphyromonas	Porphyromonas sp.	1482cd3e822eed9ad47e86d471efb499
1	Bacteria	Bacteroidota	Bacteroidia	Bacteroidales	Porphyromonadaceae	Porphyromonas_A	Porphyromonas_A sp.2	c5d93dff2d77f9de866552c0469095cd
1	Bacteria	Bacteroidota	Bacteroidia	Bacteroidales	Bacteroidaceae	Bacteroides	Bacteroides sp.44	6840d1a92a3ea248c863467fc311d423
4	Bacteria	Bacteroidota	Bacteroidia	Bacteroidales	Bacteroidaceae	Bacteroides	Bacteroides sp900761785/splanchnicus	7620ca3d65a04f4741031a537c61ec5c
1	Bacteria	Bacteroidota	Bacteroidia	Bacteroidales	Bacteroidaceae	Bacteroides	Bacteroides sp.45	e2988273318adbd2e94ece730e99751c
1	Bacteria	Bacteroidota	Bacteroidia	Bacteroidales	Bacteroidaceae	Bacteroides	Bacteroides sp.46	7a78937da50969eee46d5ea23051b99f
1	Bacteria	Bacteroidota	Bacteroidia	Bacteroidales	Order_Bacteroidales	Order_Bacteroidales	Order_Bacteroidales	78687f6363f3df6b61e4e250d06f5e0f
1	Bacteria	Bacteroidota	Bacteroidia	Bacteroidales	Marinifilaceae	Odoribacter	Odoribacter sp.	1b7a5cb7224afe934530fba452326c61
1	Bacteria	Bacteroidota	Bacteroidia	Bacteroidales	Marinifilaceae	Butyricimonas	Butyricimonas faecalis	94cbdedf5801d07891760cbe0c265236
1	Bacteria	Bacteroidota	Bacteroidia	Bacteroidales	Marinifilaceae	Butyricimonas	Butyricimonas sp.	348c97dbcc846bec88c6d970b25b32c0
1	Bacteria	Bacteroidota	Bacteroidia	Bacteroidales	Marinifilaceae	Butyricimonas	Butyricimonas sp.2	6c0b19a9d7f423447fd45c6bd9cbd6fd
1	Bacteria	Bacteroidota	Bacteroidia	Bacteroidales	Marinifilaceae	Butyricimonas	Butyricimonas sp.3	72cb82922791fadb7d06f0e7edad817e
1	Bacteria	Bacteroidota	Bacteroidia	Bacteroidales	Marinifilaceae	Butyricimonas	Butyricimonas sp.4	d1e277d9b9e25a2ff3f3166a2badedea
1	Bacteria	Bacteroidota	Bacteroidia	Bacteroidales	Marinifilaceae	Butyricimonas	Butyricimonas sp.5	3f6d2cfe63af05924d80cc830508d812
1	Bacteria	Bacteroidota	Bacteroidia	Bacteroidales	Marinifilaceae	Butyricimonas	Butyricimonas sp.6	4230758afeb7e241f8f7e605b0a04d41
1	Bacteria	Bacteroidota	Bacteroidia	Bacteroidales	Muribaculaceae	CAG-279	CAG-279 sp.4	d4473bf865fce092a90b4dd6ae85e7fe
1	Bacteria	Bacteroidota	Bacteroidia	Bacteroidales	Barnesiellaceae	Barnesiella	Barnesiella intestinihominis	6592657848ca07b934b9eecbce139dce
1	Bacteria	Bacteroidota	Bacteroidia	Bacteroidales	Barnesiellaceae	Barnesiella	Barnesiella sp.2	12c309f98037049385855dca11e370f1
1	Bacteria	Bacteroidota	Bacteroidia	Bacteroidales	UBA11471	UBA11471	UBA11471 sp.	ec965e4f4650e29602c3a67d802439fe
1	Bacteria	Bacteroidota	Bacteroidia	Bacteroidales	UBA11471	UBA11471	UBA11471 sp.2	2b9c183d0dcf32f79c08125d3544b4bc
1	Bacteria	Bacteroidota	Bacteroidia	Bacteroidales	UBA11471	UBA11471	UBA11471 sp.3	97154716e82610fc35438a5dc5c70309
4	Bacteria	Bacteroidota	Bacteroidia	Bacteroidales	UBA11471	UBA11471	UBA11471 sp.4	54576c4896c625acff83191d8d1a004e
1	Bacteria	Bacteroidota	Bacteroidia	Bacteroidales	Barnesiellaceae	Barnesiella	Barnesiella sp.3	12f5704716b76772d7a733452752b086
4	Bacteria	Bacteroidota	Bacteroidia	Bacteroidales	UBA11471	UBA11471	UBA11471 sp900547555	9c9ae919ee2bc48497eb611f2da2d5d0
1	Bacteria	Bacteroidota	Bacteroidia	Bacteroidales	UBA11471	UBA11471	UBA11471 sp.5	b3914d3781ad0c4d35454af70a05f32f
1	Bacteria	Bacteroidota	Bacteroidia	Bacteroidales	Barnesiellaceae	Barnesiella	Barnesiella sp.4	0ec018bb6c66242625224241fd52f66d
1	Bacteria	Bacteroidota	Bacteroidia	Bacteroidales	Barnesiellaceae	Barnesiella	Barnesiella sp.5	55ae2476be4e14ff915d716ed79b1118
4	Bacteria	Bacteroidota	Bacteroidia	Bacteroidales	Barnesiellaceae	Barnesiella	Barnesiella sp.6	57face48ec571894748b66cab7c52d5e
1	Bacteria	Bacteroidota	Bacteroidia	Bacteroidales	Barnesiellaceae	Barnesiella	Barnesiella sp.7	6c61ad539d5ae41e62cca6793f422010
1	Bacteria	Bacteroidota	Bacteroidia	Bacteroidales	Barnesiellaceae	Barnesiella	Barnesiella sp.8	6f5d327c141612c99de3f64d997ba2e9
1	Bacteria	Bacteroidota	Bacteroidia	Bacteroidales	Barnesiellaceae	Barnesiella	Barnesiella sp.9	e9c2ba9626b506bfa63c589161ce8836
1	Bacteria	Bacteroidota	Bacteroidia	Bacteroidales	Barnesiellaceae	Barnesiella	Barnesiella sp.10	c11f0800885bbecf6f6eafff07fc3a36
4	Bacteria	Bacteroidota	Bacteroidia	Bacteroidales	Barnesiellaceae	Barnesiella	Barnesiella sp.11	ecee51679f447ca26ffea8796dffc7f6
1	Bacteria	Bacteroidota	Bacteroidia	Bacteroidales	Barnesiellaceae	Barnesiella	Barnesiella sp.12	cb659ff22f31a594098ce65f7cb29904
1	Bacteria	Bacteroidota	Bacteroidia	Bacteroidales	Barnesiellaceae	Barnesiella	Barnesiella sp.13	f422edfdc50199ca45f11d478fd3b7e9
1	Bacteria	Bacteroidota	Bacteroidia	Bacteroidales	Barnesiellaceae	Barnesiella	Barnesiella sp.14	7dc8a293b0a28ddd2a265132ae837abb
1	Bacteria	Bacteroidota	Bacteroidia	Bacteroidales	Muribaculaceae	Sodaliphilus	Sodaliphilus sp.	9ea41fee4fc61f113e7eb636acbe3c7f
1	Bacteria	Bacteroidota	Bacteroidia	Bacteroidales	Muribaculaceae	Muribaculum	Muribaculum sp.	aa78a53c79d875e5d6a4eb3abae4ae66
1	Bacteria	Bacteroidota	Bacteroidia	Bacteroidales	Muribaculaceae	CAG-873	CAG-873 sp001701165	c6eeb2a850887d3d12b41db556ca46a9
1	Bacteria	Bacteroidota	Bacteroidia	Bacteroidales	Muribaculaceae	CAG-485	CAG-485 sp.	fc4d5e1458d334f3e76cfb7866eb642b
1	Bacteria	Bacteroidota	Bacteroidia	Bacteroidales	Muribaculaceae	Family_Muribaculaceae	Family_Muribaculaceae	66ae949c8d26f92d7e0853b060917b7c
1	Bacteria	Bacteroidota	Bacteroidia	Bacteroidales	Muribaculaceae	UBA7173	UBA7173 sp.	9f6c7aa10e5e82acfe5d46bb432274e4
1	Bacteria	Bacteroidota	Bacteroidia	Bacteroidales	Muribaculaceae	UBA7173	UBA7173 sp.2	dd99bfbc8ab20ac0aedadf32d39567ba
1	Bacteria	Bacteroidota	Bacteroidia	Bacteroidales	Muribaculaceae	UBA7173	UBA7173 sp.3	dca660554179f28518c6dafa9aaf8abf
4	Bacteria	Bacteroidota	Bacteroidia	Bacteroidales	Muribaculaceae	UBA7173	UBA7173 sp.4	ee4f2f3987d4a8402297ad04bd13396b
4	Bacteria	Bacteroidota	Bacteroidia	Bacteroidales	Muribaculaceae	UBA7173	UBA7173 sp.5	74aec4566c5419905b71545c8450be57
1	Bacteria	Firmicutes_A	Clostridia	Clostridiales	Clostridiaceae	Clostridium	Clostridium sp.14	29115aeb8514d427e25ade2b3549475d
1	Bacteria	Firmicutes_A	Clostridia	Clostridiales	Clostridiaceae	Clostridium	Clostridium sp.15	45a5369def68f28267f7afcca2713078
1	Bacteria	Firmicutes_A	Clostridia	Clostridiales	Clostridiaceae	Clostridium	Clostridium sp.16	6e8461d3368c330191e1596e8d134229
4	Bacteria	Firmicutes_A	Clostridia	Clostridiales	Clostridiaceae	Clostridium	Clostridium sp.17	4894f808b2b857c0f05ceb9f2800a269
1	Bacteria	Firmicutes_A	Clostridia	Clostridiales	Clostridiaceae	Clostridium	Clostridium sp.18	95ca6cf02a72a5a0ddf2a3c14e87984a
1	Bacteria	Firmicutes_A	Clostridia	Clostridiales	Clostridiaceae	Clostridium	Clostridium sp.19	abf028b7234a7774d8827989c9be591b
1	Bacteria	Firmicutes_A	Clostridia	Clostridiales	Clostridiaceae	Clostridium	Clostridium disporicum_A/sp000753455	a69903064ccbed61fe63ee8c1ba7e181
1	Bacteria	Firmicutes_A	Clostridia	Clostridiales	Clostridiaceae	Clostridium	Clostridium sp.20	55d5edf0e1cbc1a087016f25fda32b61
1	Bacteria	Firmicutes_A	Clostridia	Clostridiales	Clostridiaceae	Clostridium	Clostridium sp.21	21c03dc0b878a7715344c884383fb065
4	Bacteria	Firmicutes_A	Clostridia	Clostridiales	Clostridiaceae	Clostridium	Clostridium sp001916075	3c3e0f8507be26f6fe98a75b3e46cbf8
1	Bacteria	Firmicutes_A	Clostridia	Clostridiales	Clostridiaceae	Clostridium	Clostridium sp.22	912d571acd0b6e8ea80a7998292d719c
1	Bacteria	Firmicutes_A	Clostridia	Clostridiales	Clostridiaceae	Clostridium	Clostridium sp.23	2663bd1f47486619f8c0d5878f25a35c
1	Bacteria	Firmicutes_A	Clostridia	Clostridiales	Clostridiaceae	Clostridium	Clostridium sp.24	abd4f19d4efed73479ef28a0c784e55c
1	Bacteria	Firmicutes_A	Clostridia	Clostridiales	Clostridiaceae	Clostridium	Clostridium sp.25	76bc8aff366e4a23163debcfd0fc7bcb
1	Bacteria	Firmicutes_A	Clostridia	Clostridiales	Clostridiaceae	Clostridium	Clostridium sp.26	725ab8cabc1a789b39d1dee9efb01c60
1	Bacteria	Firmicutes_A	Clostridia	Clostridiales	Clostridiaceae	Clostridium	Clostridium sp.27	85b4a0769132dabb2eec411bf9e76327
4	Bacteria	Firmicutes_A	Clostridia	Clostridiales	Clostridiaceae	Clostridium	Clostridium sp.28	87846f0a7dfdd8e06f5a5cca31de871f
1	Bacteria	Firmicutes_A	Clostridia	Clostridiales	Clostridiaceae	Clostridium_P	Clostridium_P sp.11	b3733e5ff5dbd9c4904bc19772acb3f0
1	Bacteria	Firmicutes_A	Clostridia	Clostridiales	Clostridiaceae	Clostridium_P	Clostridium_P sp.12	45438617ad387f2158b34d80193ab765
4	Bacteria	Firmicutes_A	Clostridia	Clostridiales	Clostridiaceae	Clostridium_P	Clostridium_P ventriculi	ea85a0af7e7f24f35b590608cc6d3fa6
1	Bacteria	Firmicutes_A	Clostridia	Clostridiales	Clostridiaceae	Clostridium	Clostridium sp.29	377983eb758a97cf14e49efce6c1914d
1	Bacteria	Firmicutes_A	Clostridia	Clostridiales	Clostridiaceae	Clostridium	Clostridium sp.30	96205603cd82a389c94e81e425205b5d
3	Bacteria	Firmicutes_A	Clostridia	Clostridiales	Clostridiaceae	Clostridium	Clostridium cuniculi/saudiense	e6172c1ecfacc2929527f5bde824b7d2
1	Bacteria	Firmicutes_A	Clostridia	Clostridiales	Clostridiaceae	Clostridium	Clostridium sp.31	db754067fa6352ac131dc34f0941ad5f
4	Bacteria	Firmicutes_A	Clostridia	Lachnospirales	Lachnospiraceae	Mediterraneibacter	Mediterraneibacter lactaris	28140f938211613722bf20f771286d3f
1	Bacteria	Firmicutes_A	Clostridia	Lachnospirales	Lachnospiraceae	Mediterraneibacter	Mediterraneibacter sp.	b8beeb7ade454cdd051c5aa4f0bb1ba9
3	Bacteria	Firmicutes_A	Clostridia	Lachnospirales	Lachnospiraceae	Mediterraneibacter	Mediterraneibacter torques	34b4fe1c4fea2fb9c7e317d1a13058e3
4	Bacteria	Firmicutes_A	Clostridia	Lachnospirales	Lachnospiraceae	Mediterraneibacter	Mediterraneibacter sp.2	d3d6f836d7a584717906c6a18485c965
1	Bacteria	Firmicutes_A	Clostridia	Lachnospirales	Lachnospiraceae	Mediterraneibacter	Mediterraneibacter sp.3	b0e9905287511da328891bcbb4cd65ac
4	Bacteria	Firmicutes_A	Clostridia	Lachnospirales	Lachnospiraceae	Mediterraneibacter	Mediterraneibacter sp.4	52df59ee117803680011b8333a09a7ac
4	Bacteria	Firmicutes_A	Clostridia	Lachnospirales	Lachnospiraceae	Family_Lachnospiraceae	Family_Lachnospiraceae3	a45a38d92041c5e9a283a67688e705d8
3	Bacteria	Firmicutes_A	Clostridia	Lachnospirales	Lachnospiraceae	Family_Lachnospiraceae	Family_Lachnospiraceae4	62392dc20bb4fd6c46d3cb038b13cb9e
1	Bacteria	Firmicutes_A	Clostridia	Lachnospirales	Lachnospiraceae	Family_Lachnospiraceae	Family_Lachnospiraceae5	864c2236bacded9d144addb5cb8b1001
1	Bacteria	Firmicutes_A	Clostridia	Lachnospirales	Lachnospiraceae	Family_Lachnospiraceae	Family_Lachnospiraceae6	0199c328b682b6731439939008ba0377
4	Bacteria	Firmicutes_A	Clostridia	Lachnospirales	Lachnospiraceae	Blautia_A	Blautia_A sp900066505	880c013d0c4690fb1a3527feca39db72
1	Bacteria	Firmicutes_A	Clostridia	Lachnospirales	Lachnospiraceae	Ruminococcus_A	Ruminococcus_A sp.	35000d1d272946314390906cf9d7e5cb
1	Bacteria	Firmicutes_A	Clostridia	Lachnospirales	Lachnospiraceae	Ruminococcus_A	Ruminococcus_A sp.2	aff5f7e39b85add3f9042e1870eb2659
4	Bacteria	Firmicutes_A	Clostridia	Lachnospirales	Lachnospiraceae	Ruminococcus_A	Ruminococcus_A sp003011855	c09959795af38fda32bf78e1a20d4278
4	Bacteria	Firmicutes_A	Clostridia	Lachnospirales	Lachnospiraceae	Ruminococcus_A	Ruminococcus_A sp.3	444948c510925336c40f53665601fd71
4	Bacteria	Firmicutes_A	Clostridia	Lachnospirales	Lachnospiraceae	Ruminococcus_A	Ruminococcus_A faecicola	8f75a2796333f542b31ec72728d0364c
2	Bacteria	Firmicutes_A	Clostridia	Lachnospirales	Lachnospiraceae	Blautia_A	Blautia_A caecimuris	bed9f1dd9af0687c31da9b3f8852bfd0
1	Bacteria	Firmicutes_A	Clostridia	Lachnospirales	Lachnospiraceae	Blautia_A	Blautia_A sp.	01cc358686577b28430d0c5166451b20
1	Bacteria	Firmicutes_A	Clostridia	Lachnospirales	Lachnospiraceae	Blautia_A	Blautia_A sp.2	c909d710e0dfdeb87c94353392ab7fc1
4	Bacteria	Firmicutes_A	Clostridia	Lachnospirales	Lachnospiraceae	Blautia_A	Blautia_A faecis	6e0bb02a24abd77cd495209f712fa0de
4	Bacteria	Firmicutes_A	Clostridia	Lachnospirales	Lachnospiraceae	Blautia_A	Blautia_A sp900066145	6caf90de20a07b3354c62a1e6d896588
1	Bacteria	Firmicutes_A	Clostridia	Lachnospirales	Lachnospiraceae	Blautia_A	Blautia_A sp.3	c3752677950448818e59f87deb3438b4
1	Bacteria	Firmicutes_A	Clostridia	Lachnospirales	Lachnospiraceae	Blautia_A	Blautia_A sp.4	85680fcac40e7fbdc32a31c74fb819ff
4	Bacteria	Firmicutes_A	Clostridia	Lachnospirales	Lachnospiraceae	Blautia_A	Blautia_A obeum/sp000436615/sp900548245	fec860a6f8a8e84e8fa0eef4c0b2ef0e
1	Bacteria	Firmicutes_A	Clostridia	Lachnospirales	Lachnospiraceae	UBA7160	UBA7160 sp.	52ec4e3198184f49ee901f6743679ad4
4	Bacteria	Firmicutes_A	Clostridia	Lachnospirales	Lachnospiraceae	UBA7160	UBA7160 sp.2	bc98a42d14415c7a567b19d13b380256
4	Bacteria	Firmicutes_A	Clostridia	Lachnospirales	Lachnospiraceae	Blautia_A	Blautia_A obeum_B/sp900066355/sp900120195	1e9b841e1261154096627342a75d6417
4	Bacteria	Firmicutes_A	Clostridia	Lachnospirales	Lachnospiraceae	Blautia_A	Blautia_A sp.5	ffb70e01371827b5ff24c0627cdbbcf7
1	Bacteria	Firmicutes_A	Clostridia	Lachnospirales	Lachnospiraceae	Blautia	Blautia stercoris	57552218856eeadf8f062e6e97282f61
2	Bacteria	Firmicutes_A	Clostridia	Lachnospirales	Lachnospiraceae	Blautia	Blautia coccoides_A/hansenii/hominis/sp001304935	c073eaf335852ce09f9b1a8527e5fa75
2	Bacteria	Firmicutes_A	Clostridia	Lachnospirales	Lachnospiraceae	Blautia	Blautia coccoides	d4409fa960515460e1ab3a2b2801ed4f
2	Bacteria	Firmicutes_A	Clostridia	Lachnospirales	Lachnospiraceae	Blautia	Blautia sp900541955	d9120b1c02cda8afb74bcf19825da696
4	Bacteria	Firmicutes_A	Clostridia	Lachnospirales	Lachnospiraceae	Marvinbryantia	Marvinbryantia sp014385005/sp900066075	0cd75b2a5f0c0dfb3768e625249d3913
1	Bacteria	Firmicutes_A	Clostridia	Lachnospirales	Lachnospiraceae	Blautia_A	Blautia_A sp.6	a7f6a529e231d54e979fc9b66b514eb9
1	Bacteria	Firmicutes_A	Clostridia	Lachnospirales	Lachnospiraceae	Blautia_A	Blautia_A sp.7	9a013c72f89b6270d73cdf5191bc42e8
4	Bacteria	Firmicutes_A	Clostridia	Lachnospirales	Lachnospiraceae	Blautia_A	Blautia_A massiliensis/schinkii/sp003474435/sp900066205/sp900066335	1879c10485772c67b5cadfbd198f37da
4	Bacteria	Firmicutes_A	Clostridia	Lachnospirales	Lachnospiraceae	Blautia_A	Blautia_A sp.8	95676d3855d4a152887dab14d14b9428
3	Bacteria	Firmicutes_A	Clostridia	Lachnospirales	Lachnospiraceae	Clostridium_AP	Clostridium_AP scindens/sp000509125	0dc59846ca5c743ceb5c69562dbdf48e
4	Bacteria	Firmicutes_A	Clostridia	Lachnospirales	Lachnospiraceae	Family_Lachnospiraceae	Family_Lachnospiraceae7	93bb17c2c06c145f56b5a3b7cc5e41ed
4	Bacteria	Firmicutes_A	Clostridia	Lachnospirales	Lachnospiraceae	UBA7160	UBA7160 sp.3	358ca1cb11e15469b7d83f91aad66f11
4	Bacteria	Firmicutes_A	Clostridia	Lachnospirales	Lachnospiraceae	UMGS1375	UMGS1375 sp900066615	7df2a78bfaa0caa35eb51ce0c94e88d4
1	Bacteria	Firmicutes_A	Clostridia	Lachnospirales	Lachnospiraceae	UBA3402	UBA3402 sp.	edc3f728243e8f971a89697849d905c0
1	Bacteria	Firmicutes_A	Clostridia	Lachnospirales	Lachnospiraceae	UBA3402	UBA3402 sp.2	a2414eca3537fdad7a5af7baeb881f93
1	Bacteria	Firmicutes_A	Clostridia	Lachnospirales	Lachnospiraceae	Family_Lachnospiraceae	Family_Lachnospiraceae8	4e4b00a726ba833075589177383e7567
4	Bacteria	Firmicutes_A	Clostridia	Lachnospirales	Lachnospiraceae	G11	G11 sp.	8e70b4c170e4d08010add9db97981241
1	Bacteria	Firmicutes_A	Clostridia	Lachnospirales	Lachnospiraceae	Sellimonas	Sellimonas sp.	f8347a57e96652c145c81514c5326218
2	Bacteria	Firmicutes_A	Clostridia	Lachnospirales	Lachnospiraceae	Sellimonas	Sellimonas intestinalis	b79db003c6aabb8cd2d8c5510f0d2276
4	Bacteria	Firmicutes_A	Clostridia	Lachnospirales	Lachnospiraceae	OF09-33XD	OF09-33XD sp003481995	89216ddfb4f28622e8415ea9dd14ae46
4	Bacteria	Firmicutes_A	Clostridia	Lachnospirales	Lachnospiraceae	GCA-900066135	GCA-900066135 sp.	2002c1e92234b26a90adf6af3d414d15
1	Bacteria	Firmicutes_A	Clostridia	Lachnospirales	Lachnospiraceae	GCA-900066135	GCA-900066135 sp900066135	9c9f0070827ebea484ae0e5c71e5afe9
1	Bacteria	Firmicutes_A	Clostridia	Lachnospirales	Lachnospiraceae	Butyrivibrio_A	Butyrivibrio_A crossotus	ba7f17f67648071db101b4a14be312cc
2	Bacteria	Firmicutes_A	Clostridia	Lachnospirales	Lachnospiraceae	Clostridium_Q	Clostridium_Q symbiosum	04ac1aaec7096c309bacf3c0fb0d2311
2	Bacteria	Firmicutes_A	Clostridia	Lachnospirales	Lachnospiraceae	Faecalimonas	Faecalimonas umbilicata	17ff2015ab9ffe248ca8fe8f76cc4c31
3	Bacteria	Firmicutes_A	Clostridia	Lachnospirales	Lachnospiraceae	RUG115	RUG115 sp900066395	c29907444c3119aaa155eba14af1786c
1	Bacteria	Firmicutes_A	Clostridia	Lachnospirales	Lachnospiraceae	Agathobacter	Agathobacter sp.	02b77dc9c331686ddbcf928cf0d82d3c
1	Bacteria	Firmicutes_A	Clostridia	Lachnospirales	Lachnospiraceae	Agathobacter	Agathobacter sp.2	18389b33d7509b1711e5bdacacebdf41
3	Bacteria	Firmicutes_A	Clostridia	Lachnospirales	Lachnospiraceae	Agathobacter	Agathobacter faecis/sp000434275/sp001940165	7ce4e4dc201a6701bff5771bfcfa6d29
1	Bacteria	Firmicutes_A	Clostridia	Lachnospirales	Lachnospiraceae	Agathobacter	Agathobacter sp.3	c0ed5b47006d770d8b94cb5e5d8e5fa9
1	Bacteria	Firmicutes_A	Clostridia	Lachnospirales	Lachnospiraceae	Agathobacter	Agathobacter sp.4	d7c2f6884aef8bf95d34b6777ae219ce
1	Bacteria	Firmicutes_A	Clostridia	Lachnospirales	Lachnospiraceae	Agathobacter	Agathobacter sp.5	03b278f71f302682c0daec97781f7c22
1	Bacteria	Firmicutes_A	Clostridia	Lachnospirales	Lachnospiraceae	Agathobacter	Agathobacter sp.6	20cabf42c9daf1db06810e14aa2ac31d
1	Bacteria	Firmicutes_A	Clostridia	Lachnospirales	Lachnospiraceae	Agathobacter	Agathobacter sp.7	962f8bed8eff3562cd48e1e2d6d14a9b
1	Bacteria	Firmicutes_A	Clostridia	Lachnospirales	Lachnospiraceae	Agathobacter	Agathobacter sp.8	f2959c9a3a819f27aea2df58c4677702
1	Bacteria	Firmicutes_A	Clostridia	Lachnospirales	Lachnospiraceae	Agathobacter	Agathobacter sp.9	098e55e2d5a1908ed66743cf6043e52a
1	Bacteria	Firmicutes_A	Clostridia	Lachnospirales	Lachnospiraceae	Agathobacter	Agathobacter sp.10	961cd1eee8eafa16113f9a3fb42dcc59
4	Bacteria	Firmicutes_A	Clostridia	Lachnospirales	Lachnospiraceae	Agathobacter	Agathobacter rectalis	fb88d5698f31eb7529434b5287e82b1b
1	Bacteria	Firmicutes_A	Clostridia	Lachnospirales	Lachnospiraceae	Agathobacter	Agathobacter sp.11	3c152ab4a0bb4ed8af7ceb20d40c560f
1	Bacteria	Firmicutes_A	Clostridia	Lachnospirales	Lachnospiraceae	Agathobacter	Agathobacter sp.12	47374a44ce736a1ee0a935b7263ed0f5
1	Bacteria	Firmicutes_A	Clostridia	Lachnospirales	Lachnospiraceae	Agathobacter	Agathobacter sp.13	70478bc9e943f02d7ac2a93b2e15f344
1	Bacteria	Firmicutes_A	Clostridia	Lachnospirales	Lachnospiraceae	Agathobacter	Agathobacter sp.14	b92034e09662fa1324dc65adc9490391
1	Bacteria	Firmicutes_A	Clostridia	Lachnospirales	Lachnospiraceae	Agathobacter	Agathobacter sp.15	fd8b8712c63329a105b5bb8bb7f47e04
1	Bacteria	Firmicutes_A	Clostridia	Lachnospirales	Lachnospiraceae	Agathobacter	Agathobacter sp.16	f06072b3d6b721c76b163175cbe33bdb
1	Bacteria	Firmicutes_A	Clostridia	Lachnospirales	Lachnospiraceae	Family_Lachnospiraceae	Family_Lachnospiraceae9	cc433c97fcf1f2d9413432df890b801a
3	Bacteria	Firmicutes_A	Clostridia	Lachnospirales	Lachnospiraceae	Agathobacter	Agathobacter sp.17	86ddcf2c51c82182b66d47e7e929e9f0
4	Bacteria	Firmicutes_A	Clostridia	Lachnospirales	Lachnospiraceae	CAG-45	CAG-45 sp000438375	5e24563825ed21fcfaa1960f640f3f60
1	Bacteria	Firmicutes_A	Clostridia	Lachnospirales	Lachnospiraceae	Roseburia	Roseburia sp.	80160b44f1aa297ef8db780cb797e66a
4	Bacteria	Firmicutes_A	Clostridia	Lachnospirales	Lachnospiraceae	Roseburia	Roseburia hominis	b1f3bc0430f89d92154a6a3e690a0525
1	Bacteria	Firmicutes_A	Clostridia	Lachnospirales	Lachnospiraceae	Roseburia	Roseburia sp.2	9942643c07c3cff0f7a7b90053a274e6
3	Bacteria	Firmicutes_A	Clostridia	Lachnospirales	Lachnospiraceae	Roseburia	Roseburia intestinalis/sp003470905	84e155c2dc0680bddc685827c5de3285
1	Bacteria	Firmicutes_A	Clostridia	Lachnospirales	Lachnospiraceae	Roseburia	Roseburia sp.3	fba90cf2ccdaee0ffa47235e2e8116a1
1	Bacteria	Firmicutes_A	Clostridia	Lachnospirales	Lachnospiraceae	Roseburia	Roseburia sp.4	28837af08847c5bbf22cacfeff471acb
4	Bacteria	Firmicutes_A	Clostridia	Lachnospirales	Lachnospiraceae	Family_Lachnospiraceae	Family_Lachnospiraceae10	db6250bd2d0178018872e4fb398dd8be
1	Bacteria	Firmicutes_A	Clostridia	Lachnospirales	Lachnospiraceae	Family_Lachnospiraceae	Family_Lachnospiraceae11	6b2af0621af33ce34754a77c6e7b1aef
4	Bacteria	Firmicutes_A	Clostridia	Lachnospirales	Lachnospiraceae	Eubacterium_I	Eubacterium_I ramulus	bc4d8389d50e90fc73b5527b32127bd6
4	Bacteria	Firmicutes_A	Clostridia	Lachnospirales	Lachnospiraceae	Eubacterium_G	Eubacterium_G sp000435815	0c9d9b4a8283dce34da65b00d8259503
4	Bacteria	Firmicutes_A	Clostridia	Lachnospirales	Lachnospiraceae	Eubacterium_G	Eubacterium_G sp000432355/ventriosum	34e1ff886deda4588f3161aa3a6644e8
1	Bacteria	Firmicutes_A	Clostridia	Lachnospirales	Lachnospiraceae	Muricomes	Muricomes contortus_B/sp000509105	097c0e27d72b6830014897b90dd3f899
1	Bacteria	Firmicutes_A	Clostridia	Lachnospirales	Lachnospiraceae	Muricomes	Muricomes contortus_C	dfe36f8c0be966fd77e669dc49388ab8
2	Bacteria	Firmicutes_A	Clostridia	Lachnospirales	Lachnospiraceae	Schaedlerella	Schaedlerella sp.2	3f4af360ef3fd4f002e3f419e7328d5b
4	Bacteria	Firmicutes_A	Clostridia	Lachnospirales	Lachnospiraceae	Schaedlerella	Schaedlerella sp900066545	6e1ede2ad4d5d7359b1642d1931176dc
4	Bacteria	Firmicutes_A	Clostridia	Lachnospirales	Lachnospiraceae	Lachnoclostridium_B	Lachnoclostridium_B sp900066555	4694a36538089ea1a2f507f15f20ffe4
4	Bacteria	Firmicutes_A	Clostridia	Lachnospirales	Lachnospiraceae	Dorea_A	Dorea_A longicatena/longicatena_B	f0df3ebe4cacb5461f7d88ad55ae8d22
4	Bacteria	Firmicutes_A	Clostridia	Lachnospirales	Lachnospiraceae	Dorea_A	Dorea_A sp.	96e3b1ea206ed9f2e6f63ced14521641
1	Bacteria	Firmicutes_A	Clostridia	Lachnospirales	Lachnospiraceae	Dorea_A	Dorea_A sp.2	407787e79426284b743aeeb78ed1249e
1	Bacteria	Firmicutes_A	Clostridia	Lachnospirales	Lachnospiraceae	Ruminococcus_B	Ruminococcus_B sp.	bce0a49fd4998ee4cead6eb0a05968df
1	Bacteria	Firmicutes_A	Clostridia	Lachnospirales	Lachnospiraceae	Ruminococcus_B	Ruminococcus_B sp.2	44573380dca9457c254636aa1dd54839
1	Bacteria	Firmicutes_A	Clostridia	Lachnospirales	Lachnospiraceae	Ruminococcus_B	Ruminococcus_B sp.3	aaa5678ffb0c405a2ad428f88d69f621
1	Bacteria	Firmicutes_A	Clostridia	Lachnospirales	Lachnospiraceae	Ruminococcus_B	Ruminococcus_B sp.4	69671bc561a23808d24a8cd25d69bb03
2	Bacteria	Firmicutes_A	Clostridia	Lachnospirales	Lachnospiraceae	Ruminococcus_B	Ruminococcus_B gnavus	72bda5561e865a5539c4f19f992ee830
1	Bacteria	Firmicutes_A	Clostridia	Lachnospirales	Lachnospiraceae	Ruminococcus_B	Ruminococcus_B sp.5	73f344c63fef585d1837ca27eca8406f
1	Bacteria	Firmicutes_A	Clostridia	Lachnospirales	Lachnospiraceae	Ruminococcus_B	Ruminococcus_B sp.6	01a2b64bd04b1ad48f55af3ddf5db0c6
1	Bacteria	Firmicutes_A	Clostridia	Lachnospirales	Lachnospiraceae	Ruminococcus_B	Ruminococcus_B sp.7	590b136370a10f001a828f713a206e91
1	Bacteria	Firmicutes_A	Clostridia	Lachnospirales	Lachnospiraceae	Ruminococcus_B	Ruminococcus_B sp.8	81089393020a096cc4e05ab27c811fc0
2	Bacteria	Firmicutes_A	Clostridia	Lachnospirales	Lachnospiraceae	Ruminococcus_B	Ruminococcus_B sp.9	dd464d74db96f1e7a0b296af659cd19c
2	Bacteria	Firmicutes_A	Clostridia	Lachnospirales	Lachnospiraceae	Eisenbergiella	Eisenbergiella massiliensis	2bb792dc76a244c5aff56572237e9ffa
2	Bacteria	Firmicutes_A	Clostridia	Lachnospirales	Lachnospiraceae	Eisenbergiella	Eisenbergiella sp.	c1e444de12388fb9b8167cbc11d8e54b
4	Bacteria	Firmicutes_A	Clostridia	Lachnospirales	Lachnospiraceae	Family_Lachnospiraceae	Family_Lachnospiraceae12	95dd711bf4c921998089314e09de5aea
4	Bacteria	Firmicutes_A	Clostridia	Lachnospirales	Lachnospiraceae	CAG-317	CAG-317 sp000433215	51e4e72299f77a7a9c9e214035a5d324
1	Bacteria	Firmicutes_A	Clostridia	Lachnospirales	Lachnospiraceae	CAG-603	CAG-603 sp900066105	b643efe3ea197d83f1f5fbf9cbedd5a3
4	Bacteria	Firmicutes_A	Clostridia	Lachnospirales	Lachnospiraceae	Bariatricus	Bariatricus comes/comes_A	bfe0ef267b9437cc26842e05f6c3e13e
1	Bacteria	Firmicutes_A	Clostridia	Lachnospirales	Lachnospiraceae	Faecalimonas	Faecalimonas sp.	784dd1db1fd7d1a48bcd433bc6800083
2	Bacteria	Firmicutes_A	Clostridia	Lachnospirales	Lachnospiraceae	Faecalimonas	Faecalimonas phoceensis	b60005ac44a7a8201fd8fb0eb568e7e9
1	Bacteria	Firmicutes_A	Clostridia	Lachnospirales	Lachnospiraceae	Faecalimonas	Faecalimonas sp.2	18e87c4827549b9e206f466887ca4da6
4	Bacteria	Firmicutes_A	Clostridia	Lachnospirales	Lachnospiraceae	Eisenbergiella	Eisenbergiella sp900066775	5b09f2153a5aca537025eb2af6f89947
4	Bacteria	Firmicutes_A	Clostridia	Lachnospirales	Lachnospiraceae	Eisenbergiella	Eisenbergiella sp.2	9fbaa0dd324363608a2a31d2f9d33f2e
3	Bacteria	Firmicutes_A	Clostridia	Lachnospirales	Lachnospiraceae	Enterocloster	Enterocloster sp000431375	f79ea97901cd79c2252ed495e5be5791
3	Bacteria	Firmicutes_A	Clostridia	Lachnospirales	Lachnospiraceae	Enterocloster	Enterocloster sp.	487b77a59fd92e8ff11ca7b5616a8421
4	Bacteria	Firmicutes_A	Clostridia	Lachnospirales	Lachnospiraceae	UBA7182	UBA7182 sp003480725	c96881da80b5376bd3a6246c82377305
4	Bacteria	Firmicutes_A	Clostridia	Lachnospirales	Lachnospiraceae	Dorea	Dorea formicigenerans	9c2d0a619a7a99c1644494985caeca1d
1	Bacteria	Firmicutes_A	Clostridia	Lachnospirales	Lachnospiraceae	Blautia_A	Blautia_A sp.9	3c994b5986f1e4e8e9f70aa89ed8305c
1	Bacteria	Firmicutes_A	Clostridia	Lachnospirales	Lachnospiraceae	Blautia_A	Blautia_A sp.10	381e4b5006980decc3e6c32aa46de0c1
1	Bacteria	Firmicutes_A	Clostridia	Lachnospirales	Lachnospiraceae	Blautia_A	Blautia_A sp.11	0cd7126e1942e2c1e6725a1b352d4607
1	Bacteria	Firmicutes_A	Clostridia	Lachnospirales	Lachnospiraceae	Blautia_A	Blautia_A sp.12	5e5266d1f7d0951caf02fb442a5a0cb3
1	Bacteria	Firmicutes_A	Clostridia	Lachnospirales	Lachnospiraceae	Blautia_A	Blautia_A sp.13	a49e9ed3f83b2f28ac4efb94f083f12c
4	Bacteria	Firmicutes_A	Clostridia	Lachnospirales	Lachnospiraceae	Blautia_A	Blautia_A sp000285855	2383ff81efe9a5c81c650e72beaf9cb3
1	Bacteria	Firmicutes_A	Clostridia	Lachnospirales	Lachnospiraceae	Blautia_A	Blautia_A luti	683686c96e0994628763453c06bb2d06
1	Bacteria	Firmicutes_A	Clostridia	Lachnospirales	Lachnospiraceae	Blautia_A	Blautia_A sp.14	35e62ba2c5c750ecdf416572ce8fc0f9
1	Bacteria	Firmicutes_A	Clostridia	Lachnospirales	Lachnospiraceae	Blautia_A	Blautia_A sp.15	c380034f7f10646a2bf4ab3b7ceae91e
3	Bacteria	Firmicutes_A	Clostridia	Lachnospirales	Lachnospiraceae	Blautia_A	Blautia_A sp003471165/sp003477525/sp003480185/wexlerae_B	1c88ca8aa0ed62fb2fb8bebb8cb25670
1	Bacteria	Firmicutes_A	Clostridia	Lachnospirales	Lachnospiraceae	Blautia_A	Blautia_A sp.16	3ac05f654ef45041949b4bd7cfa9dad3
1	Bacteria	Firmicutes_A	Clostridia	Lachnospirales	Lachnospiraceae	Blautia_A	Blautia_A sp.17	766c145b966abfc10c69fae71264feff
1	Bacteria	Firmicutes_A	Clostridia	Lachnospirales	Lachnospiraceae	Blautia_A	Blautia_A sp.18	46a4ebfe42eb21977f2525f03ce2940f
2	Bacteria	Firmicutes_A	Clostridia	Lachnospirales	Lachnospiraceae	Robinsoniella	Robinsoniella peoriensis/sp900540475	1539066bdf3efb796b8884e36b50e5b7
4	Bacteria	Firmicutes_A	Clostridia	Lachnospirales	Lachnospiraceae	Enterocloster	Enterocloster sp.2	86be6914e63487a8d7c6f7d7fbefcf99
1	Bacteria	Firmicutes_A	Clostridia	Lachnospirales	Lachnospiraceae	CAG-95	CAG-95 sp.	fc65529c3fea0d9cfd67a160ce6957de
2	Bacteria	Firmicutes_A	Clostridia	Lachnospirales	Lachnospiraceae	Enterocloster	Enterocloster sp900538485	6ae50439574d86851b2fcc8da95799d7
2	Bacteria	Firmicutes_A	Clostridia	Lachnospirales	Lachnospiraceae	Merdimonas	Merdimonas faecis	44aae6aa73b2245ca134b9e76297243e
2	Bacteria	Firmicutes_A	Clostridia	Lachnospirales	Lachnospiraceae	Hungatella_A	Hungatella_A hathewayi_A/sp005845265	f4a2f44c453707eee491e184a4c7b528
1	Bacteria	Firmicutes_A	Clostridia	Lachnospirales	Lachnospiraceae	Hungatella	Hungatella sp.	49ebc6cae4b9495d0013ed9cbae7c8a5
2	Bacteria	Firmicutes_A	Clostridia	Lachnospirales	Lachnospiraceae	Hungatella	Hungatella effluvii	ae90b0ce379ef144d9bb740516265a6c
4	Bacteria	Firmicutes_A	Clostridia	Lachnospirales	Lachnospiraceae	Acetatifactor	Acetatifactor sp900066365	fccf9b38f0596644eab0612a5cd57597
3	Bacteria	Firmicutes_A	Clostridia	Lachnospirales	Lachnospiraceae	Acetatifactor	Acetatifactor sp.	054f2648ebb335c71de8be22c7539a22
1	Bacteria	Firmicutes_A	Clostridia	Lachnospirales	Lachnospiraceae	Clostridium_Q	Clostridium_Q sp.	dd26d94397ca74e51bc648df9b1a5818
2	Bacteria	Firmicutes_A	Clostridia	Lachnospirales	Lachnospiraceae	Clostridium_Q	Clostridium_Q sp.2	1b14d3d7f9639374c315be9dbc4a8fc5
1	Bacteria	Firmicutes	Bacilli	Lactobacillales	Lactobacillaceae	Lactobacillus	Lactobacillus sp.3	92cf9130c3963f16efb845d0b16ed2d3
1	Bacteria	Firmicutes	Bacilli	Lactobacillales	Lactobacillaceae	Leuconostoc	Leuconostoc citreum/holzapfelii/lactis/lactis_A	168cf79d8695e1423c2cc6dbf2cc3f68
1	Bacteria	Firmicutes	Bacilli	Lactobacillales	Lactobacillaceae	Leuconostoc	Leuconostoc mesenteroides/suionicum	6a6cac9a0022192848cfe36b6cdc55d8
2	Bacteria	Firmicutes_A	Clostridia	Lachnospirales	Lachnospiraceae	Enterocloster	Enterocloster asparagiformis/lavalensis	13d678eae4d2f658972faf21b932ad75
2	Bacteria	Firmicutes_A	Clostridia	Lachnospirales	Lachnospiraceae	Enterocloster	Enterocloster sp900540675	752ab1712f54365ead7562ec075fe3c6
2	Bacteria	Firmicutes_A	Clostridia	Lachnospirales	Lachnospiraceae	Enterocloster	Enterocloster bolteae/citroniae/clostridioformis	638a38b5687cc1626d085283dcca6a51
1	Bacteria	Firmicutes_A	Clostridia	Lachnospirales	Lachnospiraceae	Enterocloster	Enterocloster sp.3	1e66f0710d32451f0187b946cde7c96f
1	Bacteria	Firmicutes_A	Clostridia	Lachnospirales	Lachnospiraceae	Enterocloster	Enterocloster sp.4	2f3bdd821f386dc4926db3596aeeeaca
2	Bacteria	Firmicutes_A	Clostridia	Lachnospirales	Lachnospiraceae	CAG-81	CAG-81 sp900066055/sp900066535	ccd2d2e1ebdbda1ee4bf03fb8f401307
2	Bacteria	Firmicutes_A	Clostridia	Lachnospirales	Lachnospiraceae	CAG-81	CAG-81 sp.	20bddea1062c34fe82e1cd18adfbf32b
2	Bacteria	Firmicutes_A	Clostridia	Lachnospirales	Lachnospiraceae	CAG-81	CAG-81 sp900066785	e2f7aa19c11e3adf96a7030321b7e2e4
1	Bacteria	Firmicutes_A	Clostridia	Lachnospirales	Lachnospiraceae	Lacrimispora	Lacrimispora celerecrescens/celerecrescens_B/sphenoides/sphenoides_A	bd930ec718da906ce0ae573b6ed85022
1	Bacteria	Firmicutes_A	Clostridia	Lachnospirales	Lachnospiraceae	Family_Lachnospiraceae	Family_Lachnospiraceae13	ff011bda3c950839aa99faf6cedc0ec5
4	Bacteria	Firmicutes_A	Clostridia	Lachnospirales	Lachnospiraceae	Clostridium_Q	Clostridium_Q sp003024715	34e55c0f0706224ff8a1aca1ede0a505
2	Bacteria	Firmicutes_A	Clostridia	Lachnospirales	Lachnospiraceae	Enterocloster	Enterocloster sp.5	30ef39708ebcdcddbcdc2f2439c3c398
2	Bacteria	Firmicutes_A	Clostridia	Lachnospirales	Lachnospiraceae	Enterocloster	Enterocloster aldenensis	f43c36b22c1bc8798a8d7f25125919f6
3	Bacteria	Firmicutes_A	Clostridia	Lachnospirales	Lachnospiraceae	UBA9502	UBA9502 sp003478505/sp003480315/sp003481825/sp003506385	b2c5f0d55453383ac1deda19b8c3bed2
2	Bacteria	Firmicutes_A	Clostridia	Lachnospirales	Lachnospiraceae	Enterocloster	Enterocloster sp001517625	ab8cf03d7d5eb6d8aedd296ab4225414
1	Bacteria	Firmicutes_A	Clostridia	Lachnospirales	Lachnospiraceae	Enterocloster	Enterocloster sp000155435	e5e51d9940a3c45538fd7d9542c958eb

## Sheet: MAMI
Trajectory	Domain	Phylum	Class	Order	Family	Genus	Species	TaxaID
1	Bacteria	Firmicutes	Bacilli	Lactobacillales	Lactobacillaceae	Lactobacillus	gasseri	583ea5121db98cb55ba6674e4f1a6c0c
1	Bacteria	Actinobacteriota	Actinobacteria	Bifidobacteriales	Bifidobacteriaceae	Bifidobacterium	breve	c655ea3ab4323fd1d3af8c8e280b8b3c
2	Bacteria	Firmicutes	Bacilli	Lactobacillales	Streptococcaceae	Streptococcus	thermophilus	c58b8ab69a30c042e151a2c2b40175d4
2	Bacteria	Actinobacteriota	Actinobacteria	Bifidobacteriales	Bifidobacteriaceae	Bifidobacterium	breve.1	08dadb99f874e6ce1eaf7fc3dac69ffa
1	Bacteria	Firmicutes_A	Clostridia	Peptostreptococcales	Peptostreptococcaceae	Clostridioides	Clostridioides difficile/difficile_A/difficile_D	675ff6627272028b678fc6742e0dafcb
1	Bacteria	Firmicutes	Clostridia	Lachnospirales	Lachnospiraceae	Anaerostipes	hadrus	0883701d0583da2196109ae423f7f099
1	Bacteria	Firmicutes	Bacilli	Erysipelotrichales	Erysipelotrichaceae	Catenisphaera	Catenisphaera	7c5735a3aa2690d665aaf7c1d6cdab8f
1	Bacteria	Firmicutes	Negativicutes	Veillonellales-Selenomonadales	Veillonellaceae	Veillonella	parvula	7813f85526b47b24f9c6b5ba4e943afc
1	Bacteria	Firmicutes	Bacilli	Lactobacillales	Enterococcaceae	Family_Enterococcaceae	Family_Enterococcaceae	abc20d011da8d413cc9ccaf5aa0fda44
1	Bacteria	Firmicutes	Bacilli	Lactobacillales	Enterococcaceae	Family_Enterococcaceae	Family_Enterococcaceae.1	8fee7febeca7ee50fb69fdf9534da0c2
1	Bacteria	Actinobacteriota	Actinomycetia	Actinomycetales	Actinomycetaceae	Pauljensenia	Pauljensenia odontolytica/odontolytica_A/odontolytica_B/odontolytica_C/sp000185285/sp000411415/sp000466265/sp001064145/sp001072465/sp001838165	2f0237ec232d7b1fcf56095e4ee6a2a5
1	Bacteria	Firmicutes	Bacilli	Erysipelotrichales	Erysipelotrichaceae	Holdemanella	Holdemanella sp002299315/sp003458715	ad52bbef279fc1fe7a3ca1c4b1fb9710
4	Bacteria	Firmicutes_A	Clostridia	TANB77	CAG-508	CAG-354	CAG-354 sp.2	0e6b4887dd616c85dc5bc1c268916abc
1	Bacteria	Firmicutes	Clostridia	Lachnospirales	Lachnospiraceae	Lachnoclostridium	Lachnoclostridium	40148e5847192c1960da535976939fed
1	Bacteria	Firmicutes	Clostridia	Lachnospirales	Lachnospiraceae	Anaerostipes	hadrus.1	b08a1b53a3fd538cf8355ae121525bdd
1	Bacteria	Firmicutes	Bacilli	Lactobacillales	Lactobacillaceae	Limosilactobacillus	Limosilactobacillus fermentum	96a1d66082280259c733fe68eacb5fc5
1	Bacteria	Proteobacteria	Gammaproteobacteria	Enterobacterales	Enterobacteriaceae	Enterobacter	cloacae	d3987e35071e4097b412ae43e5ac6990
1	Bacteria	Firmicutes	Bacilli	Lactobacillales	Streptococcaceae	Streptococcus	parasanguinis	399ef4330f00c53368cc9bb9a066368a
4	Bacteria	Firmicutes_A	Clostridia	Oscillospirales	Acutalibacteraceae	Hydrogeniiclostridium	Hydrogeniiclostridium mannosilyticum	3359b72af1fdf95d62d519f2c6af65b1
1	Bacteria	Firmicutes_A	Clostridia	Oscillospirales	Oscillospiraceae	Intestinimonas	Intestinimonas sp.	7d43ad53fe1a83f4d2253fa38df8ffbf
1	Bacteria	Firmicutes	Clostridia	Lachnospirales	Lachnospiraceae	Dorea	Dorea	56137413c74c8530300ed41d02eca3d6
4	Bacteria	Firmicutes	Clostridia	Oscillospirales	UCG-010	UCG-010	UCG-010	054540768f09a2a30a03216d43f3a628
1	Bacteria	Proteobacteria	Gammaproteobacteria	Enterobacterales	Enterobacteriaceae	Klebsiella	oxytoca	235d70591f359f944e01f6047403471c
2	Bacteria	Actinobacteriota	Actinomycetia	Actinomycetales	Actinomycetaceae	Pauljensenia	Pauljensenia odontolytica/odontolytica_A/odontolytica_B/odontolytica_C/sp000185285/sp000411415/sp000466265/sp001064145/sp001072465/sp001838165.1	e05832ddd89c422038c3ad7e8a599f5f
1	Bacteria	Firmicutes	Clostridia	Christensenellales	Christensenellaceae	Christensenellaceae R-7 group	Christensenellaceae R-7 group	b9a04ebf746c7932ff3ec24c211fc849
1	Bacteria	Firmicutes	Bacilli	Lactobacillales	Streptococcaceae	Streptococcus	salivarius	e55ff3e954a54e190dae7991178d66a7
1	Bacteria	Bacteroidota	Bacteroidia	Bacteroidales	Bacteroidaceae	Bacteroides	thetaiotaomicron	43a531cf80ce48488f381f68f4d3e6af
1	Bacteria	Firmicutes	Negativicutes	Veillonellales-Selenomonadales	Veillonellaceae	Veillonella	dispar	0c0c1d33558e819b18a5d46a94b85609
1	Bacteria	Bacteroidota	Bacteroidia	Bacteroidales	Bacteroidaceae	Bacteroides	plebeius	08103eba808b71bec3cd95a7cb12fc27
1	Bacteria	Firmicutes	Bacilli	Staphylococcales	Staphylococcaceae	Staphylococcus	caprae	7f10b51fd747c75fc2985382e2097512
1	Bacteria	Firmicutes_A	Clostridia	Lachnospirales	Lachnospiraceae	Anaerostipes	Anaerostipes caccae/sp000508985	7356347ad13b151db3c00a3e47f2a620
1	Bacteria	Firmicutes_A	Clostridia	Clostridiales	Clostridiaceae	Clostridium_P	Clostridium_P ventriculi	0117a19ee071b740b9c2b029c390e0a4
1	Bacteria	Firmicutes	Clostridia	Lachnospirales	Lachnospiraceae	Blautia	Blautia	dee85a7a4fe985168cd8579e53201e9b
1	Bacteria	Actinobacteriota	Coriobacteriia	Coriobacteriales	Eggerthellaceae	Senegalimassilia	Senegalimassilia	20054143fbfc181b6679a2e878753538
1	Bacteria	Firmicutes	Negativicutes	Veillonellales-Selenomonadales	Veillonellaceae	Veillonella	atypica	66451ed3342638c5b0a3885dd37a92d8
1	Bacteria	Actinobacteriota	Actinomycetia	Actinomycetales	Actinomycetaceae	Pauljensenia	Pauljensenia pyogenes_A/sp000308055	d4995b62bede530b0e08e80b6a44ceb8
1	Bacteria	Actinobacteriota	Actinobacteria	Corynebacteriales	Corynebacteriaceae	Corynebacterium	accolens	48ca852d6fb7cd259c13838915e3c0a9
2	Bacteria	Actinobacteriota	Actinobacteria	Bifidobacteriales	Bifidobacteriaceae	Bifidobacterium	breve.2	5ac33bf8e1860272ee198df1dac699c8
1	Bacteria	Firmicutes	Clostridia	Lachnospirales	Lachnospiraceae	Frisingicoccus	Frisingicoccus	a34b9fae085ea151f728465943bc4b74
1	Bacteria	Firmicutes	Clostridia	Peptostreptococcales-Tissierellales	Peptostreptococcaceae	Clostridioides	mangenotii	cfa6e473a0198e54729b5c596288d972
1	Bacteria	Firmicutes_A	Clostridia	Clostridiales	Clostridiaceae	Clostridium	Clostridium sp.18	c0261d0337b6594c4103a5f20a856dde
1	Bacteria	Firmicutes	Clostridia	Lachnospirales	Lachnospiraceae	Agathobacter	Agathobacter	ac2b2f19591d4745090d362b5d85c765
2	Bacteria	Actinobacteriota	Actinobacteria	Bifidobacteriales	Bifidobacteriaceae	Bifidobacterium	longum	28231b50a8fba140af6f57d92ac64703
1	Bacteria	Firmicutes	Bacilli	Lactobacillales	Enterococcaceae	Family_Enterococcaceae	Family_Enterococcaceae.2	0c3c13452e46afe262ce635fdf2f8bbb
1	Bacteria	Bacteroidota	Bacteroidia	Bacteroidales	Tannerellaceae	Parabacteroides	Parabacteroides sp.31	0491750a8eddf7dfad9d80798dad589d
4	Bacteria	Bacteroidota	Bacteroidia	Bacteroidales	Bacteroidaceae	Bacteroides	ovatus	15ceb00ebfbfe7d69e79f08436f255f9
1	Bacteria	Firmicutes_A	Clostridia	Oscillospirales	Butyricicoccaceae	Agathobaculum	Agathobaculum sp.	17e293d9412552f2483c73910ff7dd8d
1	Bacteria	Firmicutes	Bacilli	Staphylococcales	Staphylococcaceae	Staphylococcus	Staphylococcus	640549ed4dfaddc2afe9943c817b3daa
1	Bacteria	Firmicutes_A	Clostridia	TANB77	CAG-508	UMGS1994	UMGS1994 sp.23	476107cc35a5d974a5967e3aaa3dad44
1	Bacteria	Firmicutes	Clostridia	Lachnospirales	Lachnospiraceae	Eisenbergiella	Eisenbergiella	8f2c8ae34a82d8c05a1d58f9b8ae9a66
4	Bacteria	Bacteroidota	Bacteroidia	Bacteroidales	Bacteroidaceae	Bacteroides	Bacteroides clarus	7c1392372060c82f91782245f7b90595
1	Bacteria	Firmicutes	Bacilli	Lactobacillales	Streptococcaceae	Streptococcus	gallolyticus	bcd55cf4f89dff2468891ab1a453143e
1	Bacteria	Firmicutes	Clostridia	Lachnospirales	Lachnospiraceae	Blautia	Blautia.1	44afc46aaffae293a28828f16a3d8bf5
1	Bacteria	Bacteroidota	Bacteroidia	Bacteroidales	Tannerellaceae	Parabacteroides	Parabacteroides sp.32	8b2e8df290d86f11d205498a9b2c3fc5
2	Bacteria	Firmicutes	Bacilli	Erysipelotrichales	Erysipelotrichaceae	[Clostridium] innocuum group	[Clostridium] innocuum group	e494b9bee65b3ab404b57288dcf42a22
1	Bacteria	Firmicutes_A	Clostridia	Oscillospirales	Oscillospiraceae	CAG-83	CAG-83 sp.2	0f06bc73534321814ff0e341f4846fac
4	Bacteria	Firmicutes_A	Clostridia	Monoglobales	Monoglobaceae	Monoglobus	Monoglobus pectinilyticus	ba968750389f02d4d38a04a5bbc736cc
4	Bacteria	Firmicutes_A	Clostridia	Oscillospirales	Acutalibacteraceae	Eubacterium_R	Eubacterium_R sp.5	257a3feb1cfa43f2c55429863b0f16b3
1	Bacteria	Firmicutes	Bacilli	Lactobacillales	Streptococcaceae	Streptococcus	Streptococcus	b02d039dbcdd89fbba689da4ba2a58fd
1	Bacteria	Firmicutes	Clostridia	Lachnospirales	Lachnospiraceae	Blautia	Blautia.2	d5518d48e47332fd75e9178788c120ef
1	Bacteria	Proteobacteria	Gammaproteobacteria	Burkholderiales	Burkholderiaceae	Burkholderia-Caballeronia-Paraburkholderia	Burkholderia-Caballeronia-Paraburkholderia	7a9c7be1b271bbf13c6a946aa43c695d
1	Bacteria	Actinobacteriota	Coriobacteriia	Coriobacteriales	Coriobacteriales Incertae Sedis	Coriobacteriales Incertae Sedis	Coriobacteriales Incertae Sedis	47ee52769ca0b6976e67b22e57857d8a
1	Bacteria	Firmicutes	Bacilli	Lactobacillales	Lactobacillaceae	HT002	HT002	7587f3150ef5a124ddf8dd9305ce4f0e
1	Bacteria	Firmicutes	Clostridia	Clostridia UCG-014	Clostridia UCG-014	Clostridia UCG-014	Clostridia UCG-014	892b08383e970b3943a996befc7d2965
1	Bacteria	Firmicutes_A	Clostridia	Peptostreptococcales	Peptostreptococcaceae	Terrisporobacter	Terrisporobacter sp.	d5de366a628d88c8d61dc82668a4f246
1	Bacteria	Firmicutes_A	Clostridia	Lachnospirales	Lachnospiraceae	Enterocloster	Enterocloster sp.3	0db21076d3d2b935599d211da69f6773
1	Bacteria	Firmicutes	Clostridia	Lachnospirales	Lachnospiraceae	Blautia	glucerasea	d665d97021453e89d63fcef44a1516ce
1	Bacteria	Firmicutes	Negativicutes	Veillonellales-Selenomonadales	Veillonellaceae	Veillonella	ratti	5b43ae25eadbbc2a642f03d6e10d3d68
1	Bacteria	Actinobacteriota	Actinomycetia	Actinomycetales	Bifidobacteriaceae	Bifidobacterium	Bifidobacterium dentium/moukalabense	18022eedaeaa65455397611510ef1bf1
1	Bacteria	Firmicutes	Bacilli	Lactobacillales	Enterococcaceae	Family_Enterococcaceae	Family_Enterococcaceae.3	9e4976b3f22f2889ea2348b491c0feb0
1	Bacteria	Bacteroidota	Bacteroidia	Bacteroidales	Tannerellaceae	Parabacteroides	faecis	5993c28bb55996feb7699b84933fb8a2
4	Bacteria	Bacteroidota	Bacteroidia	Bacteroidales	Rikenellaceae	Alistipes_A	Alistipes_A ihumii	5207023275b891ef37f87a0ec090c4c0
1	Bacteria	Firmicutes	Bacilli	Staphylococcales	Staphylococcaceae	Staphylococcus	Staphylococcus.1	c0f84fe46b74aa8004d40b94b78ae7af
1	Bacteria	Bacteroidota	Bacteroidia	Bacteroidales	Bacteroidaceae	Paraprevotella	Paraprevotella sp.2	8cfedb2ee90b9f339cfc89974a931da3
4	Bacteria	Firmicutes_A	Clostridia	Oscillospirales	Oscillospiraceae	CAG-83	CAG-83 sp.5	ddf8c140c0dc12be5d69696cdddb91e0
1	Bacteria	Firmicutes	Bacilli	Lactobacillales	Streptococcaceae	Streptococcus	gallolyticus.1	c43c3732877f6571298792940f8b1142
1	Bacteria	Firmicutes	Bacilli	Lactobacillales	Streptococcaceae	Streptococcus	salivarius.1	c3f05f8236bb3e0a71d47f8d551864f2
1	Bacteria	Actinobacteriota	Coriobacteriia	Coriobacteriales	Eggerthellaceae	Eggerthella	Eggerthella	2e447b0935c36c96341d34763cb41b90
4	Bacteria	Firmicutes_A	Clostridia	TANB77	CAG-508	UMGS1994	UMGS1994 sp.10	70fc31ea420a5e436f9d854a0f6337ff
4	Bacteria	Firmicutes	Bacilli	Erysipelotrichales	Erysipelatoclostridiaceae	Erysipelatoclostridium	Erysipelatoclostridium	e7a4da69235b46585fb4de0679ea016b
1	Bacteria	Firmicutes	Bacilli	Lactobacillales	Enterococcaceae	Enterococcus_A	Enterococcus_A avium/florum/gilvus/hermanniensis/malodoratus/pallens/pseudoavium/raffinosus/sp005405205/viikkiensis/xiangfangensis	1537d414bbaab30e614b634e688f79d2
1	Bacteria	Firmicutes	Negativicutes	Veillonellales-Selenomonadales	Veillonellaceae	Veillonella	parvula.1	d6403e5b4389d1c8f2e1c218c0a59134
1	Bacteria	Actinobacteriota	Actinomycetia	Actinomycetales	Bifidobacteriaceae	Bifidobacterium	Bifidobacterium dentium/moukalabense.1	0589a5705dda45b2c385f9ead4b90a85
1	Bacteria	Firmicutes	Bacilli	Erysipelotrichales	Erysipelatoclostridiaceae	Erysipelatoclostridium	Erysipelatoclostridium.1	36ff7bf96de50d5dec05e244a8c30409
1	Bacteria	Firmicutes	Bacilli	Erysipelotrichales	Erysipelotrichaceae	Faecalitalea	Faecalitalea	1999bab288c87874c05a3c1c8bcec11a
1	Bacteria	Bacteroidota	Bacteroidia	Bacteroidales	Bacteroidaceae	Bacteroides	Bacteroides sp.14	632f712701a6269e41c3ee600d0f3791
1	Bacteria	Firmicutes	Clostridia	Oscillospirales	Ruminococcaceae	Faecalibacterium	prausnitzii	4a420faa88a25e251320f41006a3ade5
1	Bacteria	Firmicutes	Negativicutes	Veillonellales-Selenomonadales	Veillonellaceae	Veillonella	Veillonella	724aa37cd078ceaec6496087eca17567
1	Bacteria	Firmicutes	Bacilli	Erysipelotrichales	Erysipelotrichaceae	Holdemanella	Holdemanella sp002299315/sp003458715.1	0912b28575a74ce5e6ba44e9cb765167
2	Bacteria	Firmicutes_A	Clostridia	Lachnospirales	Lachnospiraceae	Blautia_A	Blautia_A sp.16	709477ffaf6d8be77399193347bfc0df
1	Bacteria	Firmicutes	Bacilli	Staphylococcales	Staphylococcaceae	Staphylococcus	Staphylococcus.2	f2cbc807f0e7273ea1247657cfbbd89e
1	Bacteria	Firmicutes	Clostridia	Lachnospirales	Lachnospiraceae	[Ruminococcus] gauvreauii group	[Ruminococcus] gauvreauii group	e35a656587935b0f2208ddf6c8da95ab
1	Bacteria	Firmicutes	Bacilli	Lactobacillales	Streptococcaceae	Streptococcus	salivarius.2	4687278ae387ae58e88fed954a5cf057
4	Bacteria	Firmicutes_A	Clostridia	Lachnospirales	Lachnospiraceae	UBA7160	UBA7160 sp.3	c55b486b00eb7dd2bd960c38c024d1d1
4	Bacteria	Firmicutes_A	Clostridia	Oscillospirales	Oscillospiraceae	Dysosmobacter	Dysosmobacter welbionis	09ad3f07c79e7bbc78206689dc55492d
4	Bacteria	Firmicutes	Clostridia	Clostridia vadinBB60 group	Clostridia vadinBB60 group	Clostridia vadinBB60 group	Clostridia vadinBB60 group	981a4f3de8c3ecf16022bceaae7f9de0
1	Bacteria	Firmicutes	Clostridia	Lachnospirales	Lachnospiraceae	Lachnospiraceae NK4A136 group	Lachnospiraceae NK4A136 group	a5f1b8a1dd239fe8749e16e54fbcebea
1	Bacteria	Firmicutes	Bacilli	Lactobacillales	Streptococcaceae	Streptococcus	Streptococcus.1	c2c1406ae93c09b94a742e38f9450150
2	Bacteria	Firmicutes	Bacilli	Lactobacillales	Lactobacillaceae	Leuconostoc	pseudomesenteroides	90c1ae30dde9d7fd3c5ef60974e63108
1	Bacteria	Actinobacteriota	Actinobacteria	Corynebacteriales	Corynebacteriaceae	Corynebacterium	pyruviciproducens	d36499c9f338b19f604b84ac18a8ca84
1	Bacteria	Firmicutes	Clostridia	Peptostreptococcales-Tissierellales	Family XI	Anaerococcus	vaginalis	52f146393407252251fe7c6a26323bff
1	Bacteria	Firmicutes_A	Clostridia	Oscillospirales	Oscillospiraceae	Intestinimonas	Intestinimonas sp.2	31c8d82793b64b8813034f0ebd64ded3
4	Bacteria	Bacteroidota	Bacteroidia	Bacteroidales	Bacteroidaceae	Bacteroides	dorei	4abaa483334092f021534a979086baeb
2	Bacteria	Firmicutes	Bacilli	Lactobacillales	Streptococcaceae	Streptococcus	salivarius.3	0e119f6fa31f9bc6a6d4d09a63f4501b
2	Bacteria	Actinobacteriota	Actinobacteria	Bifidobacteriales	Bifidobacteriaceae	Bifidobacterium	longum.1	fd4a97892e4d1e995523a4275e85d82c
2	Bacteria	Firmicutes	Clostridia	Lachnospirales	Lachnospiraceae	[Ruminococcus] torques group	[Ruminococcus] torques group	135874eee5abc581b719320e5ef6f34e
1	Bacteria	Firmicutes	Clostridia	Peptostreptococcales-Tissierellales	Family XI	Anaerococcus	vaginalis.1	94f8a7ac0dbce4881c3cb6bcb92b8d73
4	Bacteria	Firmicutes_A	Clostridia	Peptostreptococcales	Peptostreptococcaceae	Romboutsia	Romboutsia sp900545985/timonensis	df3d6113f855e22f2a6d44e60f01baa7
1	Bacteria	Bacteroidota	Bacteroidia	Bacteroidales	Bacteroidaceae	Bacteroides	fragilis	a089d319e91db5c131877d21efcb0d61
1	Bacteria	Firmicutes_A	Clostridia	Lachnospirales	Lachnospiraceae	Anaerobutyricum	Anaerobutyricum sp.5	5aada95da87ce2cd1f500af2c191a900
1	Bacteria	Proteobacteria	Gammaproteobacteria	Enterobacterales	Enterobacteriaceae	Klebsiella	Klebsiella	84c9d7a95e28fbd2339073a44ac45434
4	Bacteria	Firmicutes_A	Clostridia	Oscillospirales	Acutalibacteraceae	Ruminococcus_E	Ruminococcus_E bromii/bromii_B/sp900765785	f7d40e3c3a3e3a250186ad650ae6ae42
1	Bacteria	Proteobacteria	Gammaproteobacteria	Enterobacterales	Enterobacteriaceae	Escherichia-Shigella	Escherichia-Shigella	410bd601fab87c09e5258e76d4fe503c
4	Bacteria	Bacteroidota	Bacteroidia	Bacteroidales	Bacteroidaceae	Bacteroides	finegoldii	d0b1452f06642387dfbae1381003946b
1	Bacteria	Firmicutes	Bacilli	Lactobacillales	Enterococcaceae	Family_Enterococcaceae	Family_Enterococcaceae.4	427f5142ae52662b7db0bdd5689461f0
4	Bacteria	Firmicutes	Clostridia	Lachnospirales	Lachnospiraceae	[Ruminococcus] gauvreauii group	[Ruminococcus] gauvreauii group.1	6ebba188de82d35af5cd78602fb3eb3e
4	Bacteria	Firmicutes_A	Clostridia	Lachnospirales	Lachnospiraceae	Blautia_A	Blautia_A obeum/sp000436615/sp900548245	ba3dd149fae4376d3fb35e85096e2046
1	Bacteria	Bacteroidota	Bacteroidia	Bacteroidales	Bacteroidaceae	Bacteroides	uniformis	013294676ede34c290a25d5da1d2540d
2	Bacteria	Actinobacteriota	Actinomycetia	Actinomycetales	Actinomycetaceae	Pauljensenia	Pauljensenia odontolytica/odontolytica_A/odontolytica_B/odontolytica_C/sp000185285/sp000411415/sp000466265/sp001064145/sp001072465/sp001838165.2	7da48835cacd7ec4bb0edff18a345a10
4	Bacteria	Firmicutes	Clostridia	Lachnospirales	Lachnospiraceae	UC5-1-2E3	UC5-1-2E3	1f4c2421678f1e0e027e957e185fee26
1	Bacteria	Firmicutes_A	Clostridia	TANB77	CAG-508	UMGS1994	UMGS1994 sp.12	34af898c3c365b5f0874eaef02fc9edd
1	Bacteria	Bacteroidota	Bacteroidia	Bacteroidales	Tannerellaceae	Parabacteroides	Parabacteroides sp.30	3fd5245c84387bffa65f34afac17f677
4	Bacteria	Bacteroidota	Bacteroidia	Bacteroidales	Bacteroidaceae	Bacteroides	ovatus.1	e1ca7fe4f8ddef6f0bcc8e71354e175b
2	Bacteria	Firmicutes	Clostridia	Lachnospirales	Lachnospiraceae	Blautia	Blautia.3	3e2d34095e06940a726572ff4d3b03c4
4	Bacteria	Firmicutes	Bacilli	Lactobacillales	Streptococcaceae	Lactococcus	garvieae	673379cd9d82317b181de0b060da4477
1	Bacteria	Firmicutes	Clostridia	Peptostreptococcales-Tissierellales	Family XI	Anaerococcus	hydrogenalis	3fb73596e24b26d79715907bc6306324
4	Bacteria	Firmicutes_A	Clostridia	Oscillospirales	Oscillospiraceae	CAG-83	CAG-83 sp.	494e65560668c776b1b9e745b349c50d
1	Bacteria	Firmicutes	Clostridia	Lachnospirales	Lachnospiraceae	[Ruminococcus] gnavus group	[Ruminococcus] gnavus group	115ede96dd101d9295c5eac022513d5b
1	Bacteria	Firmicutes	Bacilli	Lactobacillales	Enterococcaceae	Family_Enterococcaceae	Family_Enterococcaceae.5	e8334bad56edab07135e82a516df612e
1	Bacteria	Firmicutes	Bacilli	Lactobacillales	Lactobacillaceae	Ligilactobacillus	Ligilactobacillus	d33d84f90d2924040cf2eb66c7abe2fc
1	Bacteria	Actinobacteriota	Actinobacteria	Bifidobacteriales	Bifidobacteriaceae	Bifidobacterium	longum.2	69a2bad17fc9f3c8e515459014ce6623
1	Bacteria	Proteobacteria	Gammaproteobacteria	Enterobacterales	Enterobacteriaceae	Klebsiella	variicola	8fd88bade4ab12bca62cbcef70c3c6f0
4	Bacteria	Firmicutes_A	Clostridia	Lachnospirales	Lachnospiraceae	Hungatella_A	Hungatella_A hathewayi_A/sp005845265	e093f111e8a607cf2986c632138c85b3
1	Bacteria	Firmicutes	Bacilli	Staphylococcales	Staphylococcaceae	Staphylococcus	caprae.1	5497318e515a8c328a68f95975d9c7d4
1	Bacteria	Firmicutes	Bacilli	Lactobacillales	Lactobacillaceae	Lacticaseibacillus	Lacticaseibacillus rhamnosus	e01aba790db0ac20e4cd8387c17ee97f
2	Bacteria	Firmicutes	Bacilli	Lactobacillales	Lactobacillaceae	Limosilactobacillus	Limosilactobacillus fermentum.1	4394468b49611f78b96b64d72449fab5
1	Bacteria	Firmicutes_A	Clostridia	Clostridiales	Clostridiaceae	Clostridium	Clostridium cuniculi/saudiense	393ec86c1244e0656cb0dfd31a4a73c6
1	Bacteria	Firmicutes	Clostridia	Oscillospirales	Ruminococcaceae	Faecalibacterium	prausnitzii.1	3f73ff8af51d19d95dd95415f3b9340c
1	Bacteria	Bacteroidota	Bacteroidia	Bacteroidales	Bacteroidaceae	Family_Bacteroidaceae	Family_Bacteroidaceae2	697828d4daf583d1bf57def00ebcdb2b
1	Bacteria	Proteobacteria	Gammaproteobacteria	Enterobacterales	Enterobacteriaceae	Citrobacter	koseri	5a465041ea11a87d07afe34f8c7093f5
1	Bacteria	Proteobacteria	Gammaproteobacteria	Pseudomonadales	Moraxellaceae	Acinetobacter	Acinetobacter bouvetii_A/johnsonii/sp002135245/sp002165305/sp003711395	28400033019ee7056b4fc6040af066cd
2	Bacteria	Firmicutes	Bacilli	Erysipelotrichales	Erysipelotrichaceae	[Clostridium] innocuum group	[Clostridium] innocuum group.1	dbae50292b92cb883b9d7843da19a806
1	Bacteria	Firmicutes	Clostridia	Lachnospirales	Lachnospiraceae	Lachnospiraceae NK4A136 group	Lachnospiraceae NK4A136 group.1	51dbca22f7469bb00e4379845bc1fb83
4	Bacteria	Proteobacteria	Gammaproteobacteria	Burkholderiales	Burkholderiaceae	Sutterella	Sutterella wadsworthensis	f684347f6c1a5dcf941c4c17be9dfb8d
4	Bacteria	Firmicutes	Bacilli	Lactobacillales	Streptococcaceae	Streptococcus	salivarius.4	f37df2adf4951e7edb9215431cbf3076
1	Bacteria	Bacteroidota	Bacteroidia	Bacteroidales	Bacteroidaceae	Bacteroides	vulgatus	8e12b4088511854253011c459b97fe94
1	Bacteria	Firmicutes_A	Clostridia	Clostridiales	Clostridiaceae	Clostridium	Clostridium sartagoforme_A/tertium	c719d8c270ddd43fb77e36c8f3e86c3e
1	Bacteria	Proteobacteria	Alphaproteobacteria	Rhodobacterales	Rhodobacteraceae	HIMB11	HIMB11	8584c4c1d598ebece90f426f442c017c
1	Bacteria	Firmicutes	Negativicutes	Veillonellales-Selenomonadales	Veillonellaceae	Dialister	micraerophilus	0a0814f61d925c35779af80a2bb86879
1	Bacteria	Firmicutes_A	Clostridia	Lachnospirales	Lachnospiraceae	Faecalimonas	Faecalimonas phoceensis	7b26ef3c3bb7f75df65062ce3e723a3b
4	Bacteria	Bacteroidota	Bacteroidia	Bacteroidales	Bacteroidaceae	Bacteroides	Bacteroides cellulosilyticus	070175299e62656222c1900a4edcc5ee
1	Bacteria	Bacteroidota	Bacteroidia	Bacteroidales	Bacteroidaceae	Bacteroides	vulgatus.1	11605317505e8c497c24ef63421e74d4
1	Bacteria	Firmicutes	Bacilli	Lactobacillales	Lactobacillaceae	Lactobacillus	gasseri.1	9b23053de8f4269fe6b5ce286dfbef3c
2	Bacteria	Actinobacteriota	Actinobacteria	Bifidobacteriales	Bifidobacteriaceae	Bifidobacterium	bifidum	b824df06ee86e72c544f50ddf8e41f31
1	Bacteria	Firmicutes_A	Clostridia_A	Christensenellales	CAG-74	UBA11524	UBA11524 sp.2	26bda9d1942be2a65be7ffa46826b058
4	Bacteria	Bacteroidota	Bacteroidia	Bacteroidales	UBA11471	UBA11471	UBA11471 sp900547555	39ad3267db6e7e83e902b055e87c8b31
2	Bacteria	Actinobacteriota	Actinobacteria	Bifidobacteriales	Bifidobacteriaceae	Bifidobacterium	catenulatum	c29919216bd6a6713038fd18691cc505
1	Bacteria	Actinobacteriota	Coriobacteriia	Coriobacteriales	Coriobacteriaceae	Collinsella	Collinsella aerofaciens/aerofaciens_A/aerofaciens_E/aerofaciens_F/aerofaciens_G/aerofaciens_H/aerofaciens_J/aerofaciens_L/aerofaciens_N/sp000434535/sp000763055/sp002232035/sp003436275/sp003437035/sp003438495/sp003439125/sp003458415/sp003459245/sp003459505/sp003462685/sp003465825/sp003466125/sp003469185/sp003469205/sp003470665/sp003471585/sp003487125/sp004554255/sp900540895/sp900541015/sp900541025…	c443639930126532afd3fa2d16944b76
1	Bacteria	Firmicutes	Clostridia	Lachnospirales	Lachnospiraceae	Blautia	Blautia.4	a1c56018286b1872f34d7ff4e2586ab1
1	Bacteria	Proteobacteria	Gammaproteobacteria	Enterobacterales	Enterobacteriaceae	Klebsiella	oxytoca.1	aa1b593068acf0de32973d0162215928
4	Bacteria	Actinobacteriota	Coriobacteriia	Coriobacteriales	Eggerthellaceae	Slackia_A	Slackia_A isoflavoniconvertens	414ea75fb1462d10153c7bed625b4b99
1	Bacteria	Firmicutes	Bacilli	Lactobacillales	Streptococcaceae	Streptococcus	salivarius.5	1ddbe1e841c0c2718737839ceed3de4a
1	Bacteria	Firmicutes	Bacilli	Lactobacillales	Lactobacillaceae	Ligilactobacillus	Ligilactobacillus salivarius	a822eed692bc6f11f3e7a953ac0a23e4
2	Bacteria	Firmicutes	Clostridia	Oscillospirales	Ruminococcaceae	Faecalibacterium	Faecalibacterium	faa6bad4a3d5698a37aa7c0833498baf
2	Bacteria	Firmicutes	Clostridia	Oscillospirales	Butyricicoccaceae	Butyricicoccus	Butyricicoccus	0dd178d47f22eb910bdcf325f4c7ff6c
1	Bacteria	Firmicutes	Clostridia	Peptostreptococcales-Tissierellales	Family XI	Anaerococcus	vaginalis.2	ba6aa2afe8fb8fb98729f5462e4f48b4
1	Bacteria	Firmicutes	Clostridia	Lachnospirales	Lachnospiraceae	Anaerostipes	hadrus.2	6813c914726e90726c58857199a769b6
4	Bacteria	Firmicutes_A	Clostridia	Lachnospirales	Lachnospiraceae	CAG-317	CAG-317 sp000433215	18ef4562cd7b2198170e26cc104b84d5
1	Bacteria	Firmicutes_A	Clostridia	Peptostreptococcales	Peptostreptococcaceae	Romboutsia	Romboutsia sp.	9bba866b78e1889163efe60d8a38b508
1	Bacteria	Bacteroidota	Bacteroidia	Bacteroidales	Bacteroidaceae	Prevotella	Prevotella buccalis	4fbb98618084c74fd1ace6089912a646
1	Bacteria	Bacteroidota	Bacteroidia	Bacteroidales	Bacteroidaceae	Bacteroides	dorei.1	fd0fbd5f6b9935ad320b7f7fe8b97cc5
1	Bacteria	Firmicutes_A	Clostridia	Lachnospirales	Lachnospiraceae	TF01-11	TF01-11 sp.	eb20b292b5812aecd6de9e596b40bb04
1	Bacteria	Firmicutes_A	Clostridia	TANB77	CAG-508	UMGS1994	UMGS1994 sp.35	705b94f81bb36a4536d0c47e54890590
1	Bacteria	Firmicutes_A	Clostridia	Tissierellales	Peptoniphilaceae	Finegoldia	Finegoldia magna/magna_F/magna_H	b1718307c657646fe71c897dc5385e89
1	Bacteria	Actinobacteriota	Coriobacteriia	Coriobacteriales	Eggerthellaceae	Senegalimassilia	Senegalimassilia sp.	eb05bb7f0dda38d3d377f24fdb2a9476
4	Bacteria	Firmicutes	Clostridia	Oscillospirales	Ruminococcaceae	Candidatus Soleaferrea	Candidatus Soleaferrea	97c08ea0e9893a64b2446ff280ac9787
1	Bacteria	Proteobacteria	Gammaproteobacteria	Enterobacterales	Enterobacteriaceae	Klebsiella	variicola.1	bc712d9356e40b4fcfbca97ff092ac3d
1	Bacteria	Actinobacteriota	Actinobacteria	Corynebacteriales	Corynebacteriaceae	Corynebacterium	amycolatum	96de0f5bdec7a436c657e40b70bdfd39
1	Bacteria	Actinobacteriota	Coriobacteriia	Coriobacteriales	Eggerthellaceae	Eggerthella	Eggerthella.1	02d84188fddfa2218b80357c311ed6a3
4	Bacteria	Firmicutes_A	Clostridia	Peptostreptococcales	Anaerovoracaceae	Emergencia	Emergencia sp.	7a8f41c3a9a6f508cdc984f223a93e28
1	Bacteria	Firmicutes	Bacilli	Staphylococcales	Staphylococcaceae	Staphylococcus	caprae.2	1948c9616fdf58fadc7fdfe3eae45bd7
1	Bacteria	Bacteroidota	Bacteroidia	Bacteroidales	Bacteroidaceae	Bacteroides	massiliensis	3e93687b8cd83adb12e013fac46aab64
1	Bacteria	Proteobacteria	Gammaproteobacteria	Enterobacterales	Enterobacteriaceae	Klebsiella	quasipneumoniae	655378d7bf8118aa1329e88a85d67702
1	Bacteria	Proteobacteria	Gammaproteobacteria	Enterobacterales	Pasteurellaceae	Haemophilus_D	Haemophilus_D parainfluenzae_J/pittmaniae/sp001679485	6ebd0c0c049568140a0aded4b0640223
1	Bacteria	Bacteroidota	Bacteroidia	Bacteroidales	Bacteroidaceae	Bacteroides	ovatus.2	c885f1f3a60b02ed90fc1f454ad3abc6
1	Bacteria	Firmicutes	Bacilli	Lactobacillales	Streptococcaceae	Streptococcus	oralis	0558f7d8eab6e1e8272350176e776dc8
1	Bacteria	Proteobacteria	Gammaproteobacteria	Enterobacterales	Enterobacteriaceae	Escherichia-Shigella	coli	1ef24a460c9407f352a964d2a211914e
4	Bacteria	Firmicutes_A	Clostridia	Oscillospirales	Ruminococcaceae	QANG01	QANG01 sp.	a39e5a5df530cdeb7fbc7f48ffc9d076
1	Bacteria	Bacteroidota	Bacteroidia	Bacteroidales	Tannerellaceae	Parabacteroides	distasonis	19da3f4c24733e2587bef6063e2e2462
1	Bacteria	Proteobacteria	Gammaproteobacteria	Enterobacterales	Enterobacteriaceae	Enterobacter	hormaechei	24d821dddfbe031b81a44817e6d6a4c1
1	Bacteria	Bacteroidota	Bacteroidia	Bacteroidales	Tannerellaceae	Parabacteroides	Parabacteroides sp.31.1	fd17abff9540ff5eac53f965859c4883
1	Bacteria	Firmicutes	Bacilli	Lactobacillales	Enterococcaceae	Family_Enterococcaceae	Family_Enterococcaceae.6	0fb65b97cfcb0d59dfb10e73fc2e6e32
1	Bacteria	Firmicutes	Bacilli	Erysipelotrichales	Erysipelatoclostridiaceae	Catenibacterium	Catenibacterium	9dc4d1617c0fc4800832989ceb200309
1	Bacteria	Bacteroidota	Bacteroidia	Bacteroidales	Bacteroidaceae	Bacteroides	Bacteroides sp.17	4605d889201db433d3f14059b1a137a7
1	Bacteria	Firmicutes_A	Clostridia	TANB77	CAG-508	UMGS1994	UMGS1994 sp.15	ec42e7c76f6a627c44593f660c444793
1	Bacteria	Firmicutes	Clostridia	Lachnospirales	Lachnospiraceae	Anaerostipes	Anaerostipes	f0097ec4d10cc3052e29648a3af775c1
1	Bacteria	Firmicutes_A	Clostridia	Saccharofermentanales	DTU023	SFGY01	SFGY01 callanderi/limosum/sp004556455	17207fb6c0cb06ef110d1a454b63012f
2	Bacteria	Firmicutes	Bacilli	Erysipelotrichales	Erysipelatoclostridiaceae	Erysipelatoclostridium	ramosum	16684adccf4a4d35facc56a79870aaa9
1	Bacteria	Firmicutes	Bacilli	Lactobacillales	Enterococcaceae	Enterococcus	cecorum	b667000eb98cf17e5345425d7c1222af
4	Bacteria	Firmicutes_A	Clostridia	Peptostreptococcales	Peptostreptococcaceae	Romboutsia	Romboutsia sp900545985/timonensis.1	75fa8724226c4b0c32ddc3b2ffc64cc5
1	Bacteria	Firmicutes	Clostridia	Oscillospirales	Ruminococcaceae	Faecalibacterium	prausnitzii.2	42982904ea669f9db56dbd8bbcd6cd18
4	Bacteria	Firmicutes	Clostridia	Oscillospirales	UCG-010	UCG-010	UCG-010.1	53badc8be7b37e78a0c9662aff131106
1	Bacteria	Firmicutes	Bacilli	Staphylococcales	Staphylococcaceae	Staphylococcus	haemolyticus	df1ae7fd3a039b102a1b3f3bd17c00b7
1	Bacteria	Bacteroidota	Bacteroidia	Bacteroidales	Bacteroidaceae	Bacteroides	Bacteroides oleiciplenus/sp900556215/stercorirosoris	f5d42ffaf098585ad57716da0a2faae4
1	Bacteria	Proteobacteria	Gammaproteobacteria	Enterobacterales	Enterobacteriaceae	Klebsiella	pneumoniae	01d3c625a78097632107465055eea5c6
1	Bacteria	Firmicutes	Clostridia	Oscillospirales	Ruminococcaceae	Incertae Sedis	Incertae Sedis	ece441388439d020aaaec8efec9fe31f
1	Bacteria	Firmicutes	Clostridia	Lachnospirales	Lachnospiraceae	[Ruminococcus] torques group	lactaris	fad4d2bff3cd589127c861f61524ca1f
1	Bacteria	Firmicutes_A	Clostridia	Lachnospirales	Lachnospiraceae	Lachnospira	Lachnospira sp.2	177fbc8060a7d68921bd129e6e644061
1	Bacteria	Firmicutes	Clostridia	Lachnospirales	Lachnospiraceae	Anaerostipes	hadrus.3	b9fc08e75ea4a5b9ab585d62a5c50e83
4	Bacteria	Firmicutes_A	Clostridia	TANB77	CAG-508	UMGS1994	UMGS1994 sp.32	8c4a2a2affccb26d3836edaed67a6b75
1	Bacteria	Firmicutes	Clostridia	Lachnospirales	Lachnospiraceae	Hungatella	Hungatella	48c4d052f583df75ea127433436b7693
4	Bacteria	Firmicutes	Bacilli	Erysipelotrichales	Erysipelotrichaceae	Faecalitalea	Faecalitalea.1	e61ddce12d1e1a1a2588530087b9e2a2
1	Bacteria	Firmicutes	Clostridia	Lachnospirales	Lachnospiraceae	Lachnospiraceae NK4A136 group	Lachnospiraceae NK4A136 group.2	a25de61413aa2294ee9c001e8523d166
1	Bacteria	Firmicutes	Clostridia	Lachnospirales	Lachnospiraceae	Lachnoclostridium	Lachnoclostridium.1	5ce973b7ad3755ad73be72714ef91d6a
1	Bacteria	Firmicutes_A	Clostridia	Lachnospirales	Lachnospiraceae	Bariatricus	Bariatricus comes/comes_A	7c9347278740eb34b83973d3fa75e934
1	Bacteria	Firmicutes	Negativicutes	Veillonellales-Selenomonadales	Veillonellaceae	Veillonella	atypica.1	fd9ac014887c59d148012b53d014f6cf
1	Bacteria	Firmicutes_C	Negativicutes	Veillonellales	Dialisteraceae	Dialister	Dialister sp.4	7b8b73986580593ee5af024ca85069b5
4	Bacteria	Bacteroidota	Bacteroidia	Bacteroidales	Bacteroidaceae	Prevotellamassilia	Prevotellamassilia sp004558535	f4fe0e47974a9b84979bff3ece1fd127
2	Bacteria	Firmicutes_A	Clostridia	Lachnospirales	Lachnospiraceae	Sellimonas	Sellimonas intestinalis	a8c9933bb4c14957903ac4c060173c97
1	Bacteria	Fusobacteriota	Fusobacteriia	Fusobacteriales	Fusobacteriaceae	Fusobacterium	Fusobacterium sp.2	771f356571f0c8721654bce2961a778a
2	Bacteria	Firmicutes_A	Clostridia	Lachnospirales	Lachnospiraceae	Enterocloster	Enterocloster sp001517625	a09c0e8c314bd987a8c6f60a358f141d
4	Bacteria	Firmicutes_A	Clostridia	TANB77	CAG-508	UMGS1994	UMGS1994 sp.2	6e70787e144ed81fefaf783732828dbb
1	Bacteria	Firmicutes	Bacilli	Staphylococcales	Staphylococcaceae	Staphylococcus	caprae.3	273c15e9c8154ae1b1366d2d346f6de4
1	Bacteria	Bacteroidota	Bacteroidia	Bacteroidales	Bacteroidaceae	Paraprevotella	Paraprevotella sp.2.1	14fb586378e4509a8ef79bb1a8b9f178
1	Bacteria	Firmicutes	Bacilli	Lactobacillales	Enterococcaceae	Enterococcus_A	Enterococcus_A avium/florum/gilvus/hermanniensis/malodoratus/pallens/pseudoavium/raffinosus/sp005405205/viikkiensis/xiangfangensis.1	06eabffbe8aadc8293a9a53848f71b0b
1	Bacteria	Proteobacteria	Gammaproteobacteria	Enterobacterales	Enterobacteriaceae	Escherichia-Shigella	coli.1	090bb3c0e970f8cab61d7c42f97b2557
1	Bacteria	Firmicutes	Clostridia	Peptostreptococcales-Tissierellales	Family XI	Anaerococcus	vaginalis.3	f608da0d472b557b41c53d21b1a06c4a
1	Bacteria	Proteobacteria	Gammaproteobacteria	Burkholderiales	Oxalobacteraceae	Massilia	Massilia	c4958499a385d623fcc23067bbef7219
1	Bacteria	Proteobacteria	Gammaproteobacteria	Enterobacterales	Enterobacteriaceae	Escherichia-Shigella	sonnei	fdebae0461b23769fa5ccd8e0d77ca34
1	Bacteria	Proteobacteria	Gammaproteobacteria	Enterobacterales	Enterobacteriaceae	Escherichia-Shigella	Escherichia-Shigella.1	6883b83f34e75a10e8bfd3e24bfd48b3
1	Bacteria	Firmicutes	Bacilli	Lactobacillales	Lactobacillaceae	Lacticaseibacillus	Lacticaseibacillus rhamnosus.1	f8e20bea6e9df8d119a0d801a3b17e7e
1	Bacteria	Firmicutes	Negativicutes	Veillonellales-Selenomonadales	Veillonellaceae	Veillonella	Veillonella.1	f36280a20310791d75f15ed6c03dd66b
1	Bacteria	Firmicutes_C	Negativicutes	Acidaminococcales	Acidaminococcaceae	Phascolarctobacterium_A	Phascolarctobacterium_A sp900544885/succinatutens	b2d1249fd9754c79558be225647e60c4
1	Bacteria	Firmicutes	Bacilli	Lactobacillales	Lactobacillaceae	Limosilactobacillus	Limosilactobacillus mucosae	859dbca447fe89f27d42b30a470d2de7
1	Bacteria	Proteobacteria	Gammaproteobacteria	Enterobacterales	Enterobacteriaceae	Klebsiella	quasipneumoniae.1	15f5e6b00745dd41b1f284085f81704d
4	Bacteria	Firmicutes_A	Clostridia	Lachnospirales	Lachnospiraceae	RUG115	RUG115 sp900066395	4400354e1979621239b87e92c5a38a29
1	Bacteria	Bacteroidota	Bacteroidia	Bacteroidales	Bacteroidaceae	Phocaeicola	Phocaeicola plebeius	365d40757b7a146d54fb57f51f28657c
1	Bacteria	Firmicutes	Bacilli	Lactobacillales	Lactobacillaceae	Lacticaseibacillus	Lacticaseibacillus sp.3	23e7ced85f4371124065795e6d229427
2	Bacteria	Firmicutes_A	Clostridia	Clostridiales	Clostridiaceae	Clostridium	Clostridium cuniculi/saudiense.1	7d60fc08fc8daf70346e1677edcaf497
1	Bacteria	Firmicutes	Negativicutes	Veillonellales-Selenomonadales	Veillonellaceae	Veillonella	atypica.2	49fbac0672f1a6c7944129b6d710ab99
1	Bacteria	Bacteroidota	Bacteroidia	Bacteroidales	Bacteroidaceae	Bacteroides	vulgatus.2	b80e17f078c884ecbef1ca2c1096270d
1	Bacteria	Desulfobacterota	Desulfovibrionia	Desulfovibrionales	Desulfovibrionaceae	Desulfovibrionaceae	Desulfovibrionaceae	6a9d6559ba123b93f75f363fab20236d
4	Bacteria	Firmicutes_A	Clostridia	Peptostreptococcales	Peptostreptococcaceae	Romboutsia_A	Romboutsia_A dakarensis/hominis_A/sp902362365/weinsteinii	efa98c673cef7e11e51b27d01167c2af
1	Bacteria	Firmicutes	Clostridia	Lachnospirales	Lachnospiraceae	Lachnospiraceae	Lachnospiraceae	849abb78228aee78ecace7d6ff049129
1	Bacteria	Firmicutes	Clostridia	Clostridiales	Clostridiaceae	Clostridium sensu stricto 1	butyricum	923493bd3dec58327c27ae88a25a11c0
1	Bacteria	Firmicutes	Bacilli	Staphylococcales	Staphylococcaceae	Staphylococcus	lugdunensis	ce8cfebd412da786bea6669e9ba01fe6
1	Bacteria	Firmicutes	Clostridia	Clostridiales	Clostridiaceae	Clostridium sensu stricto 1	perfringens	5da2f2ef97f60ca57646c2d62570b281
1	Bacteria	Firmicutes	Clostridia	Lachnospirales	Lachnospiraceae	Blautia	Blautia.5	0b3ebc9d79b625187c3dbdef242a356d
1	Bacteria	Firmicutes	Clostridia	Oscillospirales	Ruminococcaceae	Faecalibacterium	prausnitzii.3	604362d47f2ef29eca42d6c6319f796b
1	Bacteria	Firmicutes	Bacilli	Lactobacillales	Lactobacillaceae	Limosilactobacillus	Limosilactobacillus antri/frumenti/oris/panis/reuteri/reuteri_D/reuteri_E/sp014145435/sp014145545/sp014145615/sp900156885/vaginalis_A	4b8b5a770f0d4e300cafe1ae66a112d4
1	Bacteria	Proteobacteria	Gammaproteobacteria	Enterobacterales	Enterobacteriaceae	Escherichia-Shigella	Escherichia-Shigella.2	054b87326e9b77fec3e83c49b990843b
4	Bacteria	Firmicutes	Clostridia	Lachnospirales	Lachnospiraceae	Anaerostipes	hadrus.4	b63160ce9a40399735fc54217006845d
1	Bacteria	Firmicutes_A	Clostridia	Lachnospirales	Lachnospiraceae	Faecalimonas	Faecalimonas umbilicata	efa3124afefea9118952cc4241bfe2e4
1	Bacteria	Proteobacteria	Gammaproteobacteria	Enterobacterales	Enterobacteriaceae	Citrobacter	freundii	1e870c64af7608a2cb5ffd2d5c5b01f3
4	Bacteria	Firmicutes_A	Clostridia	Oscillospirales	Ruminococcaceae	CAG-353	CAG-353 sp900066885	030e36497ce2fd1e74aaf812d492c8db
4	Bacteria	Firmicutes_A	Clostridia	Lachnospirales	Lachnospiraceae	Eubacterium_G	Eubacterium_G sp000435815	32d1b8c1e13d30df0aaa7f3d5db08681
1	Bacteria	Firmicutes_A	Clostridia	Tissierellales	Peptoniphilaceae	Peptoniphilus_A	Peptoniphilus_A harei/lacydonensis/phoceensis/senegalensis/sp900538655	414380f848f722bfc18a0ddaa24f4e44
1	Bacteria	Bacteroidota	Bacteroidia	Bacteroidales	Tannerellaceae	Parabacteroides	Parabacteroides distasonis_A	2d3430b145ae0be3371fcebd8196cb78
1	Bacteria	Firmicutes	Negativicutes	Acidaminococcales	Acidaminococcaceae	Acidaminococcus	fermentans	a35aa3fc20fb61d0ec439ee2009bf472
4	Bacteria	Firmicutes_A	Clostridia	Oscillospirales	Ruminococcaceae	Gemmiger	Gemmiger sp.7	49ccd7a8940970edb88ea1b9939e2737
1	Bacteria	Fusobacteriota	Fusobacteriia	Fusobacteriales	Fusobacteriaceae	Fusobacterium	hwasookii	d95d7e79d9e931ed2442decbabb2aba8
1	Bacteria	Firmicutes	Clostridia	Peptostreptococcales-Tissierellales	Family XI	Anaerococcus	Anaerococcus	82a9579aaed9a7b056764ff9e13bf5b5
1	Bacteria	Proteobacteria	Gammaproteobacteria	Pseudomonadales	Pseudomonadaceae	Pseudomonas	Pseudomonas	17c1ad424d9895c915494ff825508a4b
1	Bacteria	Proteobacteria	Gammaproteobacteria	Pseudomonadales	Pseudomonadaceae	Pseudomonas	Pseudomonas.1	8144e3f5463bf440bdbdd71684a7b0b2
1	Bacteria	Firmicutes	Bacilli	Lactobacillales	Lactobacillaceae	Limosilactobacillus	Limosilactobacillus mucosae.1	8fd06f33c94422bcbe3e13660299da66
1	Bacteria	Firmicutes	Negativicutes	Veillonellales-Selenomonadales	Veillonellaceae	Veillonella	parvula.2	7bd0e8ea3b3b16c1d16940a4aa5fbeb6
1	Bacteria	Firmicutes	Negativicutes	Veillonellales-Selenomonadales	Veillonellaceae	Veillonella	parvula.3	5ffa45b1ff8681e9b0a43ea196e86275
1	Bacteria	Firmicutes	Bacilli	Staphylococcales	Staphylococcaceae	Staphylococcus	Staphylococcus.3	6c06f0b1683effdb63b213fd14a8de1d
4	Bacteria	Firmicutes_A	Clostridia	Lachnospirales	Lachnospiraceae	Blautia_A	Blautia_A sp.3	462d2885c687a303dd7aea396cc32293
1	Bacteria	Firmicutes_A	Clostridia	Oscillospirales	Ruminococcaceae	Gemmiger	Gemmiger sp.13	d891c0fe1954490c65a2c136cc623bbf
1	Bacteria	Firmicutes	Negativicutes	Veillonellales-Selenomonadales	Veillonellaceae	Veillonella	Veillonella.2	c8b851f9ff0b7255ac31d9fa2aeff75f
1	Bacteria	Firmicutes_C	Negativicutes	Veillonellales	Megasphaeraceae	Megasphaera	Megasphaera elsdenii/sp000417505	db92d5e78fb94056efc409ace74df645
1	Bacteria	Firmicutes	Negativicutes	Veillonellales-Selenomonadales	Veillonellaceae	Veillonella	ratti.1	4c5e4f074d6e4383066ab200037f3528
1	Bacteria	Firmicutes	Bacilli	Erysipelotrichales	Erysipelatoclostridiaceae	Catenibacterium	Catenibacterium.1	13ab6a9253bd46773a8f9ef9a6ba5d5b
1	Bacteria	Firmicutes	Clostridia	Lachnospirales	Lachnospiraceae	Tyzzerella	Tyzzerella	5b0347f2578f452ab22d5de126d4ade6
1	Bacteria	Firmicutes	Bacilli	Lactobacillales	Streptococcaceae	Streptococcus	gordonii	c533a557f90737bbc8bccbbc981a8c63
2	Bacteria	Actinobacteriota	Actinobacteria	Bifidobacteriales	Bifidobacteriaceae	Bifidobacterium	bifidum.1	5a3996a6dee70f27efdf0d96377a42a5
1	Bacteria	Firmicutes	Bacilli	Bacillales	Bacillaceae	Bacillus	Bacillus	7ef1a0dae839d9d8f6a042cdf4a6a992
1	Bacteria	Firmicutes	Clostridia	Lachnospirales	Lachnospiraceae	Agathobacter	Agathobacter.1	1cd56e98a5975f13a7388d2ddde08fc2
1	Bacteria	Firmicutes	Bacilli	Staphylococcales	Staphylococcaceae	Staphylococcus	Staphylococcus.4	fa8b807838c513fc122ce62ac1fbbaf7
1	Bacteria	Firmicutes_A	Clostridia_A	Christensenellales	CAG-74	UBA11524	UBA11524 sp.2.1	f5cd50272bf5c433c2fc12eb8e61c537
2	Bacteria	Bacteroidota	Bacteroidia	Bacteroidales	Dysgonomonadaceae	Dysgonomonas	Dysgonomonas mossii/sp900079735	a37a6e343beb7d95bd6e95cb1c2f2e84
4	Bacteria	Firmicutes_A	Clostridia	Lachnospirales	Lachnospiraceae	Clostridium_Q	Clostridium_Q sp003024715	2555ab896130cd0373de325088a94110
1	Bacteria	Proteobacteria	Gammaproteobacteria	Enterobacterales	Enterobacteriaceae	Serratia	Serratia marcescens/marcescens_B/marcescens_F/marcescens_I/marcescens_J/marcescens_K/nematodiphila/surfactantfaciens/ureilytica	32e7dd57efc183a5b7e69af26d8641b9
1	Bacteria	Firmicutes	Clostridia	Clostridia UCG-014	Clostridia UCG-014	Clostridia UCG-014	Clostridia UCG-014.1	109d2333b2b06f9c24000e7c26f97867
2	Bacteria	Firmicutes	Bacilli	Lactobacillales	Streptococcaceae	Streptococcus	parasanguinis.1	07d313706ba0c85687c8d95b664b84bc
4	Bacteria	Firmicutes_A	Clostridia	TANB77	CAG-508	UMGS1994	UMGS1994 sp.15.1	68c580aed10a8f68256db3dfc2497a32
4	Bacteria	Firmicutes	Clostridia	Lachnospirales	Lachnospiraceae	Lachnospiraceae NK4A136 group	bacterium	707940842caa2afe60491008e04a8173
4	Bacteria	Bacteroidota	Bacteroidia	Bacteroidales	Bacteroidaceae	Bacteroides	ovatus.3	d2fe8c598bde9cc2b9d34a3f1e0303ca
1	Bacteria	Firmicutes	Clostridia	Clostridiales	Clostridiaceae	Clostridium sensu stricto 1	Clostridium sensu stricto 1	575b3cdc5974560068a1403c4fde4eda
1	Bacteria	Bacteroidota	Bacteroidia	Bacteroidales	Bacteroidaceae	Bacteroides	uniformis.1	ef85ff062d33fc204b057670a53303b0
4	Bacteria	Firmicutes_A	Clostridia	Lachnospirales	Lachnospiraceae	Coprococcus	Coprococcus sp000154245/sp900066115	ed7747f5b0284274c95a92cc42e8657d
1	Bacteria	Firmicutes	Clostridia	Lachnospirales	Lachnospiraceae	Blautia	Blautia.6	bbdd8d2023792421cb2eb6bcdb4c7a71
1	Bacteria	Firmicutes	Bacilli	Lactobacillales	Streptococcaceae	Streptococcus	parasanguinis.2	8872dab2a773434f1c6176f62b1dc127
4	Bacteria	Firmicutes_A	Clostridia	Lachnospirales	Lachnospiraceae	G11	G11 sp.	f9c0d23ed5120f50cb33ba4af69d24ef
1	Bacteria	Bacteroidota	Bacteroidia	Bacteroidales	Bacteroidaceae	Prevotella	Prevotella timonensis_A	8e55ce7ed7666b3795247e933599e9df
1	Bacteria	Firmicutes	Bacilli	Lactobacillales	Streptococcaceae	Streptococcus	Streptococcus.2	0b10601914513aff2418f354c60a6d4d
4	Bacteria	Bacteroidota	Bacteroidia	Bacteroidales	Bacteroidaceae	Bacteroides	massiliensis.1	4b9aa83dd2faf0fde6d55a983598efad
1	Bacteria	Firmicutes	Bacilli	Lactobacillales	Streptococcaceae	Streptococcus	salivarius.6	4753eb90064ac86f8e14c559b36f6f35
1	Bacteria	Firmicutes	Bacilli	Erysipelotrichales	Erysipelotrichaceae	Holdemanella	Holdemanella sp002299315/sp003458715.2	69c4c3c515aa49de33f6c12d12c0a2c1
2	Bacteria	Firmicutes	Bacilli	Lactobacillales	Lactobacillaceae	Limosilactobacillus	Limosilactobacillus fermentum.2	da8de4ac1f12f50122019428f5d88af3
1	Bacteria	Proteobacteria	Gammaproteobacteria	Enterobacterales	Enterobacteriaceae	Enterobacter	Enterobacter	32ab1812bd3770f4b7f6aad7273783da
4	Bacteria	Bacteroidota	Bacteroidia	Bacteroidales	Tannerellaceae	Parabacteroides	Parabacteroides johnsonii	cb17ef306146fe98440e15e8181ab0a4
4	Bacteria	Firmicutes_A	Clostridia	TANB77	CAG-508	CAG-354	CAG-354 sp.3	7d66f6c0ba5b1129442173bf2bd417dc
2	Bacteria	Actinobacteriota	Actinobacteria	Bifidobacteriales	Bifidobacteriaceae	Bifidobacterium	pullorum	c684492de5864e145aec85ba05996dce
2	Bacteria	Firmicutes	Clostridia	Lachnospirales	Lachnospiraceae	Blautia	Blautia.7	2b15687163c6bccf5d00375b298fa3e5
1	Bacteria	Proteobacteria	Gammaproteobacteria	Enterobacterales	Enterobacteriaceae	Raoultella	planticola	f440e4d7b2a4090f2583da674b9bdd46
1	Bacteria	Actinobacteriota	Actinobacteria	Bifidobacteriales	Bifidobacteriaceae	Bifidobacterium	breve.3	6ff01680b614fb52d9abc21e887ae830
1	Bacteria	Patescibacteria	Saccharimonadia	Saccharimonadales	Saccharimonadales	Saccharimonadales	Saccharimonadales	0cbef7d65763955c4ae67d16e7267c96
4	Bacteria	Firmicutes_A	Clostridia	Lachnospirales	Lachnospiraceae	OF09-33XD	OF09-33XD sp003481995	60dabde64062a51b7a51a08fae6daa0b
2	Bacteria	Firmicutes	Bacilli	Lactobacillales	Enterococcaceae	Enterococcus_A	Enterococcus_A avium/florum/gilvus/hermanniensis/malodoratus/pallens/pseudoavium/raffinosus/sp005405205/viikkiensis/xiangfangensis.2	909582aa0ff5ea0b9a12651328e12c5c
1	Bacteria	Proteobacteria	Gammaproteobacteria	Enterobacterales	Enterobacteriaceae	Escherichia-Shigella	coli.2	19230c128ef0075e2257341a8dba4d8a
1	Bacteria	Firmicutes	Clostridia	Lachnospirales	Lachnospiraceae	Lachnoclostridium	Lachnoclostridium.2	095497f9315562310f0d46b3c032b0a4
4	Bacteria	Firmicutes_A	Clostridia	Lachnospirales	Lachnospiraceae	UMGS1375	UMGS1375 sp900066615	d0bec05fec44e00c6ac84b078f0bcb37
1	Bacteria	Firmicutes_A	Clostridia	Lachnospirales	Lachnospiraceae	Robinsoniella	Robinsoniella peoriensis/sp900540475	fe925b5695a798bac522556825125f82
4	Bacteria	Firmicutes_A	Clostridia	Lachnospirales	Lachnospiraceae	Mediterraneibacter	Mediterraneibacter torques	bb35a35e317aeaf3cdd5bef973af2498
1	Bacteria	Proteobacteria	Gammaproteobacteria	Enterobacterales	Enterobacteriaceae	Enterobacter	bugandensis	dede5f6773027bb887e0699aab162175
1	Bacteria	Firmicutes	Bacilli	Lactobacillales	Streptococcaceae	Streptococcus	lutetiensis	2baebf7a3d3b37a8813da2ba0ae72fad
1	Bacteria	Firmicutes_A	Clostridia	Lachnospirales	Lachnospiraceae	Faecalimonas	Faecalimonas umbilicata.1	b7ca94f3e865a9eaffd1cfb34a0ffb37
1	Bacteria	Proteobacteria	Gammaproteobacteria	Enterobacterales	Enterobacteriaceae	Escherichia-Shigella	dysenteriae	32f5078c7694b45bb3900f6f24b17889
2	Bacteria	Firmicutes_A	Clostridia	Lachnospirales	Order_Lachnospirales	Order_Lachnospirales	Order_Lachnospirales	e322286588d2effda49041d07069629b
2	Bacteria	Firmicutes	Bacilli	Erysipelotrichales	Erysipelotrichaceae	Solobacterium	moorei	32455248f323ccf1db4ce7b77e3ce901
1	Bacteria	Firmicutes	Negativicutes	Veillonellales-Selenomonadales	Veillonellaceae	Veillonella	parvula.4	9f31ee837c070138c407b976e996da4f
1	Bacteria	Firmicutes	Bacilli	Staphylococcales	Staphylococcaceae	Staphylococcus	aureus	17231803794d6dd0be078bb5a25a4e01
1	Bacteria	Verrucomicrobiota	Verrucomicrobiae	Verrucomicrobiales	Akkermansiaceae	Akkermansia	Akkermansia	c01a4f01a6ab68071f114f3fe9e0337b
2	Bacteria	Firmicutes	Clostridia	Lachnospirales	Lachnospiraceae	Lachnoclostridium	Lachnoclostridium.3	e679eacf03b341f4e6a02de34db9d103
1	Bacteria	Proteobacteria	Gammaproteobacteria	Enterobacterales	Enterobacteriaceae	Klebsiella	pneumoniae.1	7976aaf0190f6645a9768183f3b5f6df
1	Bacteria	Bacteroidota	Bacteroidia	Bacteroidales	Prevotellaceae	Prevotella	nanceiensis	9cd1a7d9a0501bb91a69b628378d521f
1	Bacteria	Firmicutes	Clostridia	Oscillospirales	Ruminococcaceae	Subdoligranulum	Subdoligranulum	1229a9e81e02e1f9caf8857d296cf8ef
1	Bacteria	Firmicutes	Bacilli	Lactobacillales	Enterococcaceae	Family_Enterococcaceae	Family_Enterococcaceae.7	53facd507f13adba06dc4a081b5247e9
4	Bacteria	Firmicutes_A	Clostridia	Lachnospirales	Lachnospiraceae	Muricomes	Muricomes contortus_B/sp000509105	57bab9df7394498748730d8b1613bf45
2	Bacteria	Firmicutes	Clostridia	Lachnospirales	Lachnospiraceae	Blautia	obeum	801fdbe110116f75896ad7d36881499f
1	Bacteria	Firmicutes_A	Clostridia	Oscillospirales	Acutalibacteraceae	Eubacterium_R	Eubacterium_R sp.6	ea13d2899c81e7e9252ca1e8988aa8cc
4	Bacteria	Firmicutes	Clostridia	Lachnospirales	Lachnospiraceae	Blautia	Blautia.8	9a1ad3d5df05949e3099db6a4426382d
1	Bacteria	Actinobacteriota	Actinomycetia	Actinomycetales	Actinomycetaceae	Pauljensenia	Pauljensenia pyogenes_A/sp000308055.1	dffd6623ec39ce4acf20ecc83a743989
1	Bacteria	Proteobacteria	Gammaproteobacteria	Enterobacterales	Enterobacteriaceae	Escherichia-Shigella	sonnei.1	c6b1f62a5cd5c62c80b0071f1350191a
1	Bacteria	Actinobacteriota	Actinobacteria	Bifidobacteriales	Bifidobacteriaceae	Bifidobacterium	longum.3	752afe3888a87f972ebcd23497fa50e1
2	Bacteria	Firmicutes	Bacilli	Lactobacillales	Streptococcaceae	Streptococcus	Streptococcus.3	ae80ee1968a868df26cebfe372f0612d
1	Bacteria	Actinobacteriota	Actinobacteria	Micrococcales	Micrococcaceae	Rothia	mucilaginosa	fd315c7478b8d9f235028663e67ea61d
1	Bacteria	Firmicutes	Negativicutes	Veillonellales-Selenomonadales	Veillonellaceae	Veillonella	atypica.3	f5ace249d26046fde1f908326c9421d8
4	Bacteria	Firmicutes	Clostridia	Lachnospirales	Lachnospiraceae	Lachnospiraceae	Lachnospiraceae.1	2e177c862518982a521d88de7c1dcae1
4	Bacteria	Firmicutes_A	Clostridia_A	Christensenellales	CAG-74	UBA11524	UBA11524 sp.2.2	ec218a15697875da7cebdfd21fa49cd6
1	Bacteria	Firmicutes	Negativicutes	Veillonellales-Selenomonadales	Veillonellaceae	Veillonella	parvula.5	a6271f0da5dc2d305fc2c059e15d5f29
4	Bacteria	Bacteroidota	Bacteroidia	Bacteroidales	Bacteroidaceae	Bacteroides	Bacteroides sp900761785/splanchnicus	a43ac195ae760513c79622ac9ac6ff2d
4	Bacteria	Firmicutes_A	Clostridia_A	Christensenellales	CAG-138	RUG472	RUG472 sp.	a82bde64cdb916106ef6cbaa710f7afc
2	Bacteria	Actinobacteriota	Actinobacteria	Corynebacteriales	Corynebacteriaceae	Corynebacterium	argentoratense	36b01f762b37ea7169701fe73614f506
1	Bacteria	Firmicutes	Bacilli	Lactobacillales	Streptococcaceae	Streptococcus	anginosus	fb3a1838e4556844efebeb418e436360
1	Bacteria	Proteobacteria	Gammaproteobacteria	Enterobacterales	Enterobacteriaceae	Klebsiella	Klebsiella.1	435cd78f12997063e545087b8b4d9b5a
1	Bacteria	Firmicutes	Bacilli	Lactobacillales	Streptococcaceae	Streptococcus	salivarius.7	eae4a9b0765398ffc147aaeaf8e78221
1	Bacteria	Firmicutes_A	Clostridia	Lachnospirales	Lachnospiraceae	Blautia	Blautia coccoides_A/hansenii/hominis/sp001304935	bfcef64e764a307413ba69590f860e0d
1	Bacteria	Bacteroidota	Bacteroidia	Bacteroidales	Bacteroidaceae	Bacteroides	ovatus.4	3a8939a0cab75c8b20ecf45dfe3c27e2
1	Bacteria	Proteobacteria	Gammaproteobacteria	Enterobacterales	Enterobacteriaceae	Citrobacter	koseri.1	86c0062ab86d292a689aa2a969ecf38a
4	Bacteria	Bacteroidota	Bacteroidia	Bacteroidales	Tannerellaceae	Parabacteroides	Parabacteroides sp.30.1	1c1c2dd95299d9f9c2d969551673bae8
4	Bacteria	Firmicutes	Clostridia	Clostridia UCG-014	Clostridia UCG-014	Clostridia UCG-014	Clostridia UCG-014.2	d8b5671a882cb6087fed4a7d6406137c
4	Bacteria	Firmicutes_A	Clostridia	Lachnospirales	Lachnospiraceae	Mediterraneibacter	Mediterraneibacter lactaris	5287d8ae64d1e964b0bb7c203d98e154
1	Bacteria	Actinobacteriota	Coriobacteriia	Coriobacteriales	Eggerthellaceae	Enterorhabdus	Enterorhabdus	e18378b0ab57ba50d98bf43c61bd3779
1	Bacteria	Bacteroidota	Bacteroidia	Bacteroidales	Bacteroidaceae	Bacteroides	graminisolvens	cd2f21f455d6a9bdd1d93c12cfeff3a7
1	Bacteria	Actinobacteriota	Actinomycetia	Actinomycetales	Actinomycetaceae	Actinomyces	Actinomyces urogenitalis	557f5a5c4115b297d7c4d91b8631ae25
2	Bacteria	Firmicutes	Clostridia	Lachnospirales	Lachnospiraceae	Agathobacter	Agathobacter.2	4f334be4123a36681c1ab5f8a0ab86d1
1	Bacteria	Firmicutes	Bacilli	Lactobacillales	Streptococcaceae	Streptococcus	salivarius.8	893db18815133bca02175ae5b49150c8
1	Bacteria	Firmicutes_A	Clostridia	Clostridiales	Clostridiaceae	Clostridium_P	Clostridium_P sp.9	301992a0a605abc2fe03e30e096c9d2a
1	Bacteria	Firmicutes	Bacilli	Lactobacillales	Lactobacillaceae	Companilactobacillus	Companilactobacillus crustorum/farciminis/farciminis_A/formosensis/halodurans/heilongjiangensis/kimchiensis/mindensis/musae/nantensis/nuruki/paralimentarius/paralimentarius_A/paralimentarius_B/sp005404815/zhachilii	a77e708951114ffb7af2549792904934
4	Bacteria	Firmicutes	Clostridia	Lachnospirales	Lachnospiraceae	Anaerostipes	hadrus.5	ede2214a6e1f6b50efcdc481bb94b3d6
1	Bacteria	Firmicutes	Negativicutes	Veillonellales-Selenomonadales	Veillonellaceae	Veillonella	ratti.2	68b00fd2add4e1d0ee9c9c16e628ed61
1	Bacteria	Firmicutes	Clostridia	Monoglobales	Monoglobaceae	Monoglobus	Monoglobus	904fdab3f60ae6d40b231bc8ee4f4ded
4	Bacteria	Firmicutes_A	Clostridia	Lachnospirales	Lachnospiraceae	Eisenbergiella	Eisenbergiella sp.	5bd72dc839fc73528c45596ca62b77f8
4	Bacteria	Verrucomicrobiota	Verrucomicrobiae	Verrucomicrobiales	Akkermansiaceae	Akkermansia	Akkermansia.1	df5c1ef25ab497ab767dcbb6be082f83
1	Bacteria	Proteobacteria	Gammaproteobacteria	Enterobacterales	Enterobacteriaceae	Raoultella	ornithinolytica	be588df4a02fa9db0ee23bee1bcfce00
1	Bacteria	Bacteroidota	Bacteroidia	Bacteroidales	Bacteroidaceae	Bacteroides	dorei.2	09b86e72da49f34f81158fc216fa80c6
1	Bacteria	Proteobacteria	Gammaproteobacteria	Enterobacterales	Enterobacteriaceae	Enterobacter	Enterobacter.1	fe0dde1d9bba1957bdd81d7ac7e3e96a
1	Bacteria	Firmicutes	Bacilli	Staphylococcales	Staphylococcaceae	Staphylococcus	Staphylococcus.5	d0c54b93b799939b4ce0c2d85a83c6ab
4	Bacteria	Firmicutes_A	Clostridia	Peptostreptococcales	Anaerovoracaceae	UBA1191	UBA1191 sp900545775	a45cae49b25e218e7c11ff2fc2f1a7eb
1	Bacteria	Actinobacteriota	Actinobacteria	Bifidobacteriales	Bifidobacteriaceae	Bifidobacterium	bifidum.2	3685b7acf28460e491d5ee5cf1f23640
2	Bacteria	Firmicutes	Clostridia	Lachnospirales	Lachnospiraceae	[Ruminococcus] torques group	[Ruminococcus] torques group.1	8b96817089748cc75779482b7833adc9
1	Bacteria	Firmicutes	Negativicutes	Veillonellales-Selenomonadales	Veillonellaceae	Veillonella	atypica.4	ba949769a678dfdb349b396f205796dd
2	Bacteria	Firmicutes	Bacilli	Erysipelotrichales	Erysipelatoclostridiaceae	Erysipelatoclostridium	Erysipelatoclostridium.2	9be29c524ac1691b915732c5e362ffdf
2	Bacteria	Actinobacteriota	Actinobacteria	Bifidobacteriales	Bifidobacteriaceae	Bifidobacterium	longum.4	38b7580c13cf081c9f279006c2dc70b9
1	Bacteria	Bacteroidota	Bacteroidia	Bacteroidales	Dysgonomonadaceae	Dysgonomonas	Dysgonomonas	73f26ecf33d017576729335965c0afad
4	Bacteria	Firmicutes	Clostridia	Lachnospirales	Lachnospiraceae	Agathobacter	Agathobacter.3	b264ac8ff5f9aff74f0b9aa084d9a9f0
4	Bacteria	Firmicutes_A	Clostridia	TANB77	CAG-508	UMGS1994	UMGS1994 sp.29	08b73661fb8b94854ee83d692130c972
4	Bacteria	Bacteroidota	Bacteroidia	Bacteroidales	Bacteroidaceae	Bacteroides	ovatus.5	0246885cf7157b74ba80daf1b827b996
4	Bacteria	Bacteroidota	Bacteroidia	Bacteroidales	Bacteroidaceae	Paraprevotella	Paraprevotella sp.2.2	2fbd3634e0158306b8bce16dd492abdd
2	Bacteria	Firmicutes_A	Clostridia	Lachnospirales	Lachnospiraceae	Clostridium_Q	Clostridium_Q symbiosum	2ab424bb8819d10f58e3059611aeb88c
4	Bacteria	Firmicutes	Clostridia	Oscillospirales	UCG-010	UCG-010	UCG-010.2	4c1207a8c761145ccd45725fdbd1e15c
1	Bacteria	Actinobacteriota	Actinobacteria	Micrococcales	Promicromonosporaceae	Cellulosimicrobium	cellulans	ba2c4a61c96219ce0880164d0e93e7b3
1	Bacteria	Firmicutes	Bacilli	Lactobacillales	Lactobacillaceae	Limosilactobacillus	Limosilactobacillus mucosae.2	b62393e6809cb349ff20b0cca53bc959
2	Bacteria	Firmicutes	Bacilli	Lactobacillales	Streptococcaceae	Streptococcus	thermophilus.1	6927ae592101441000c0bb28c9e6afdd
1	Bacteria	Firmicutes_A	Clostridia	Lachnospirales	Lachnospiraceae	Enterocloster	Enterocloster aldenensis	393c122e5df9fadef5113c87dad5fe66
1	Bacteria	Firmicutes	Clostridia	Christensenellales	Christensenellaceae	Christensenellaceae R-7 group	Christensenellaceae R-7 group.1	ac07428611cda65054aec775f50cb486
2	Bacteria	Firmicutes	Clostridia	Oscillospirales	Ruminococcaceae	Faecalibacterium	prausnitzii.4	3452e09b3c5837d42c79a414968d82a2
1	Bacteria	Proteobacteria	Gammaproteobacteria	Xanthomonadales	Xanthomonadaceae	Stenotrophomonas	maltophilia	63e0c01ab3548b3b8c26886248e633c7
1	Bacteria	Actinobacteriota	Actinobacteria	Propionibacteriales	Propionibacteriaceae	Cutibacterium	avidum	acc90d7aef8e70a434972453b6a47366
2	Bacteria	Actinobacteriota	Actinobacteria	Bifidobacteriales	Bifidobacteriaceae	Bifidobacterium	adolescentis	6cf1b18b0c5159a191acbf3e9e087961
2	Bacteria	Firmicutes_A	Clostridia	Monoglobales_A	UBA1381	CAG-41	CAG-41 sp900066215	3c493d3444d0910f8dc70c035b20457e
1	Bacteria	Firmicutes_A	Clostridia	Oscillospirales	Oscillospiraceae	Flavonifractor	Flavonifractor plautii/sp000508885	358413b7760428e0fd159a2e1c94db81
1	Bacteria	Firmicutes	Clostridia	Lachnospirales	Lachnospiraceae	Blautia	Blautia.9	74e3e814e1b66126889ed6540862937d
1	Bacteria	Actinobacteriota	Actinobacteria	Actinomycetales	Actinomycetaceae	Actinomyces	Actinomyces	19c78b0e5075f4ff3d98a26abf03057e
1	Bacteria	Firmicutes	Clostridia	Lachnospirales	Lachnospiraceae	Coprococcus	Coprococcus	48a70dbb3a58f902e2b8bf801c742a6a
1	Bacteria	Firmicutes	Clostridia	Lachnospirales	Lachnospiraceae	[Ruminococcus] gnavus group	[Ruminococcus] gnavus group.1	accbbcba539224d3846ec449e8deb995
1	Bacteria	Bacteroidota	Bacteroidia	Bacteroidales	Bacteroidaceae	Bacteroides	fragilis.1	8255b7ef9cac433fca7b7dbf2b61402e
1	Bacteria	Firmicutes	Clostridia	Lachnospirales	Lachnospiraceae	Dorea	Dorea.1	2ad117ac6005b6f3fd61b96de5a7a0cd
4	Bacteria	Firmicutes_A	Clostridia	Lachnospirales	Lachnospiraceae	Blautia_A	Blautia_A massiliensis/schinkii/sp003474435/sp900066205/sp900066335	c7d1ed6c70202259164edf3ee7806f0c
1	Bacteria	Proteobacteria	Gammaproteobacteria	Enterobacterales	Enterobacteriaceae	Enterobacter	hormaechei.1	c27071a3ace23b27c66978948a39d2a4
1	Bacteria	Firmicutes	Clostridia	Peptostreptococcales-Tissierellales	Family XI	Peptoniphilus	coxii	199f8c4a92b893b953e2f151781894c1
1	Bacteria	Firmicutes	Clostridia	Lachnospirales	Lachnospiraceae	Lachnoclostridium	Lachnoclostridium.4	e99860b42f29b146fa1ef722bb54e547
2	Bacteria	Firmicutes	Negativicutes	Veillonellales-Selenomonadales	Veillonellaceae	Megasphaera	micronuciformis	5dff4e2943dc58473fb78fa3268227b3
1	Bacteria	Bacteroidota	Rhodothermia	Rhodothermales	Rhodothermaceae	Salinibacter	ruber	ab27d2b39717aa032c31b87d68e510c8
1	Bacteria	Proteobacteria	Gammaproteobacteria	Enterobacterales	Enterobacteriaceae	Klebsiella	quasipneumoniae.2	d6dffb454cbb0b0c87367b03432c2b05
4	Bacteria	Firmicutes_A	Clostridia	Oscillospirales	Ruminococcaceae	Family_Ruminococcaceae	Family_Ruminococcaceae	4f9106b58ba967a459b11a9d6f9ca4e0
4	Bacteria	Desulfobacterota	Desulfovibrionia	Desulfovibrionales	Desulfovibrionaceae	Mailhella	Mailhella sp004555765/sp900553065/sp900556755	fa6956a33481d21382e3814e8f144ef6
1	Bacteria	Firmicutes	Bacilli	Lactobacillales	Streptococcaceae	Streptococcus	salivarius.9	7f674f4ad838ff5abfa8c77b68bfc99f
1	Bacteria	Actinobacteriota	Actinobacteria	Corynebacteriales	Corynebacteriaceae	Lawsonella	clevelandensis	3981d9783fe1e9e6c7c6cbd4c0db84d6
1	Bacteria	Firmicutes	Negativicutes	Veillonellales-Selenomonadales	Veillonellaceae	Veillonella	ratti.3	0d6534367fd596c390df2cdc3bf76275
4	Bacteria	Firmicutes_A	Clostridia_A	Christensenellales	CAG-138	PeH17	PeH17 sp.	d6d70ee8797863743fabbeb5a35dd21d
1	Bacteria	Bacteroidota	Bacteroidia	Bacteroidales	Bacteroidaceae	Prevotella	Prevotella rara	fab6bf5c7023aa62ccba8facac30cbc9
1	Bacteria	Bacteroidota	Bacteroidia	Bacteroidales	Prevotellaceae	Prevotella	nanceiensis.1	3eb19446d816293230f05b78db1fbd33
1	Bacteria	Firmicutes_A	Clostridia	Lachnospirales	Lachnospiraceae	Mediterraneibacter	Mediterraneibacter sp.2	2c7fe5d0413db38cb3e8563ed2b84775
4	Bacteria	Firmicutes	Clostridia	Oscillospirales	Ruminococcaceae	CAG-352	CAG-352	75a7dd04040e23328468b763836841ac
1	Bacteria	Firmicutes	Negativicutes	Veillonellales-Selenomonadales	Veillonellaceae	Veillonella	parvula.6	48ba7369a8be4cfdc1b0a22242bfb547
1	Bacteria	Firmicutes	Clostridia	Lachnospirales	Lachnospiraceae	Coprococcus	comes	57a77486e1d87056ba38de9977c1c8c3
2	Bacteria	Firmicutes_A	Clostridia	Lachnospirales	Lachnospiraceae	Anaerostipes	Anaerostipes caccae/sp000508985.1	fec6f192e64feb5c8c18976bcdb6e44e
4	Bacteria	Bacteroidota	Bacteroidia	Bacteroidales	Rikenellaceae	Alistipes_A	Alistipes_A ihumii.1	9037a8807f265f6926427153c9f6f6f8
1	Bacteria	Proteobacteria	Gammaproteobacteria	Burkholderiales	Neisseriaceae	Neisseria	perflava	841ea34437228d9fa66de17a4edfdaec
1	Bacteria	Firmicutes	Clostridia	Oscillospirales	Ruminococcaceae	Faecalibacterium	prausnitzii.5	5d98ac21bbf945780fe08471be7cafa7
1	Bacteria	Actinobacteriota	Coriobacteriia	Coriobacteriales	Eggerthellaceae	Senegalimassilia	Senegalimassilia anaerobia	df796b258d978ffc2ff31467cda2f996
1	Bacteria	Actinobacteriota	Actinobacteria	Bifidobacteriales	Bifidobacteriaceae	Bifidobacterium	breve.4	693e4814f1fab9baa33263c81de69185
2	Bacteria	Bacteroidota	Bacteroidia	Bacteroidales	Rikenellaceae	Alistipes	finegoldii.1	520887a54cc76670a5f7f2e64a8a651b
1	Bacteria	Firmicutes	Bacilli	Lactobacillales	Streptococcaceae	Streptococcus	parasanguinis.3	8fd457ef72e2ec553675a231e2c97243
4	Bacteria	Firmicutes_A	Clostridia	Oscillospirales	Ruminococcaceae	Ruthenibacterium	Ruthenibacterium sp900546885	7cf07b4004350bded4377afe1d9e10bf
1	Bacteria	Firmicutes_A	Clostridia	Lachnospirales	Lachnospiraceae	Blautia_A	Blautia_A obeum/sp000436615/sp900548245.1	ab39219b7b38a67d1451aba6be39c8bd
1	Bacteria	Firmicutes	Clostridia	Oscillospirales	Ruminococcaceae	Faecalibacterium	prausnitzii.6	a98d4544a6d2133db06ed097ce10edcf
1	Bacteria	Bacteroidota	Bacteroidia	Bacteroidales	Bacteroidaceae	Bacteroides	dorei.3	ed321a58e66196d720b115a968f4aeaa
4	Bacteria	Firmicutes	Clostridia	Lachnospirales	Lachnospiraceae	Lachnoclostridium	Lachnoclostridium.5	6d619e0e2931bd6ae34a28696dc76dba
1	Bacteria	Actinobacteriota	Actinobacteria	Bifidobacteriales	Bifidobacteriaceae	Bifidobacterium	bifidum.3	b960b7618908277fc4cbf066ed06a401
4	Bacteria	Bacteroidota	Bacteroidia	Bacteroidales	Bacteroidaceae	Bacteroides	dorei.4	b24ef5fe8c1ad555a6db6fb7800398d1
1	Bacteria	Proteobacteria	Gammaproteobacteria	Enterobacterales	Enterobacteriaceae	Escherichia-Shigella	coli.3	5d6e12572a564d9be7371a919a31a6af
1	Bacteria	Proteobacteria	Gammaproteobacteria	Enterobacterales	Enterobacteriaceae	Citrobacter	amalonaticus	3064bfa9e14b81761a833921f02f1348
2	Bacteria	Firmicutes	Bacilli	Erysipelotrichales	Erysipelatoclostridiaceae	Erysipelatoclostridium	ramosum.1	548444c3f8094501c45c75e25edf4572
2	Bacteria	Firmicutes	Clostridia	Eubacteriales	Eubacteriaceae	Pseudoramibacter	Pseudoramibacter	4dabe2309d1c15a45600aa8889f29291
4	Bacteria	Bacteroidota	Bacteroidia	Bacteroidales	Bacteroidaceae	Bacteroides	xylanisolvens	5859c644498bf396619fcca4ed014b8d
1	Bacteria	Bacteroidota	Bacteroidia	Bacteroidales	Bacteroidaceae	Prevotella	Prevotella sp.11	2ffae32fab38c5aafe5ec23ba0bfd7c4
1	Bacteria	Proteobacteria	Gammaproteobacteria	Enterobacterales	Enterobacteriaceae	Escherichia-Shigella	Escherichia-Shigella.3	60b42dff17604f304c929a42488f1705
4	Bacteria	Firmicutes_A	Clostridia	Oscillospirales	Acutalibacteraceae	Eubacterium_R	Eubacterium_R sp.3	8e121f6e82f82d6e7e2f831b9ce9e75c
4	Bacteria	Firmicutes_A	Clostridia	Oscillospirales	Oscillospiraceae	Dysosmobacter	Dysosmobacter sp.2	ac98d5a0d989eb469a93db5e9b3c7fd4
1	Bacteria	Bacteroidota	Bacteroidia	Bacteroidales	Prevotellaceae	Prevotella_9	Prevotella_9	c3f765238b1fecd1d3616db6d9c3d5b1
1	Bacteria	Firmicutes	Bacilli	Erysipelotrichales	Erysipelotrichaceae	Clostridium_AQ	Clostridium_AQ innocuum/sp900755895	3c239e67dd3d8d9ece49f7873f45c267
1	Bacteria	Firmicutes	Bacilli	Lactobacillales	Lactobacillaceae	Lactobacillus	Lactobacillus	f14141d03c23f3658014090c72c23866
1	Bacteria	Firmicutes	Bacilli	Lactobacillales	Lactobacillaceae	Limosilactobacillus	Limosilactobacillus fermentum.3	3928a2f4cdc892e498e0de5dae6875a9
1	Bacteria	Bacteroidota	Bacteroidia	Bacteroidales	Prevotellaceae	Prevotella_7	Prevotella_7	8cade8536ebe7db372f9170e03d50086
1	Bacteria	Bacteroidota	Bacteroidia	Bacteroidales	Bacteroidaceae	Prevotella	Prevotella buccalis.1	0f11ad9d5be83842b10a88041d80737b
2	Bacteria	Firmicutes	Clostridia	Lachnospirales	Lachnospiraceae	Sellimonas	Sellimonas	9363a7178f185820a7d5e3fcc0c3dd76
1	Bacteria	Firmicutes	Bacilli	Staphylococcales	Staphylococcaceae	Staphylococcus	hominis	b4b9764a5d06c4c9e154a617ef9ce84e
1	Bacteria	Firmicutes	Bacilli	Lactobacillales	Enterococcaceae	Family_Enterococcaceae	Family_Enterococcaceae.8	892a20bbdc3ce599dc0c5d9f0866c352
2	Bacteria	Actinobacteriota	Actinobacteria	Bifidobacteriales	Bifidobacteriaceae	Bifidobacterium	catenulatum.1	01bbd9ec32eeb27177f576a97c67f0b6
2	Bacteria	Bacteroidota	Bacteroidia	Bacteroidales	Bacteroidaceae	Bacteroides	vulgatus.3	e1a8fe9937ca4682ce833df045f46c54
1	Bacteria	Firmicutes	Bacilli	Lactobacillales	Enterococcaceae	Enterococcus	faecium	ae6cc128f7cbf38cb001db1a13eab59a
1	Bacteria	Bacteroidota	Bacteroidia	Bacteroidales	Bacteroidaceae	Bacteroides	uniformis.2	27649b5174abb5d52c191dc0e1bb68ce
1	Bacteria	Firmicutes	Negativicutes	Veillonellales-Selenomonadales	Veillonellaceae	Veillonella	ratti.4	475a7aec8371b5ad941cd8c8939867c9
1	Bacteria	Actinobacteriota	Coriobacteriia	Coriobacteriales	Coriobacteriaceae	Collinsella	Collinsella intestinalis/sp003479805/stercoris	9f4991bd1104b9d8a644027307040801
1	Bacteria	Firmicutes	Clostridia	Oscillospirales	Ruminococcaceae	Faecalibacterium	Faecalibacterium.1	bab4cdd3233dfad5a11f89154416d767
1	Bacteria	Patescibacteria	Saccharimonadia	Saccharimonadales	Saccharimonadales	Saccharimonadales	Saccharimonadales.1	2ee5f807f5e2bdc189e41fdb132f478d
1	Bacteria	Bacteroidota	Bacteroidia	Bacteroidales	Bacteroidaceae	Bacteroides	xylanisolvens.1	32fb518139942e52f0aee39171003d26
4	Bacteria	Bacteroidota	Bacteroidia	Bacteroidales	Bacteroidaceae	Bacteroides	Bacteroides sp900761785/splanchnicus.1	3a71e9a054fdfb756bfc1881602b808d
1	Bacteria	Firmicutes_A	Clostridia	Monoglobales_A	UBA1381	CAG-41	CAG-41 sp900066215.1	031527e6672941140105925506021912
1	Bacteria	Actinobacteriota	Actinomycetia	Actinomycetales	Dermabacteraceae	Dermabacter	Dermabacter hominis	9312196cf379f8a47ed5c8a2a574d242
4	Bacteria	Firmicutes	Clostridia	Oscillospirales	Ruminococcaceae	Paludicola	Paludicola	97d5ed404ba83dcbaa164b1b8aa01d57
1	Bacteria	Actinobacteriota	Actinomycetia	Actinomycetales	Actinomycetaceae	Winkia	Winkia neuii/sp002849225	bbecc042c5e5e76b8799e3e0722535b2
1	Bacteria	Firmicutes	Clostridia	Clostridiales	Clostridiaceae	Clostridium sensu stricto 1	Clostridium sensu stricto 1.1	5525570669f53b765de5e121f0cf9dda
1	Bacteria	Proteobacteria	Gammaproteobacteria	Pseudomonadales	Moraxellaceae	Acinetobacter	ursingii	f91087040dbc65ffe7d038920443fc56
2	Bacteria	Firmicutes	Clostridia	Lachnospirales	Lachnospiraceae	Dorea	formicigenerans	5c5a3b27c2239642752eb0dec3776217
2	Bacteria	Firmicutes	Clostridia	Oscillospirales	Ruminococcaceae	Faecalibacterium	Faecalibacterium.2	b168c81c6c168d341fc19a482fce86ff
4	Bacteria	Firmicutes	Clostridia	Oscillospirales	Oscillospiraceae	NK4A214 group	NK4A214 group	6c7b50075598142df95c7d7de8abb565
1	Bacteria	Firmicutes	Clostridia	Peptostreptococcales-Tissierellales	Family XI	Anaerococcus	hydrogenalis.1	f67b49cbaa53cd2a984f9d81d3d618cb
1	Bacteria	Bacteroidota	Bacteroidia	Bacteroidales	Prevotellaceae	Prevotella_9	Prevotella_9.1	17c1ba298b5153f3b421e5215c8bd5bc
4	Bacteria	Firmicutes_A	Clostridia	Peptostreptococcales	Anaerovoracaceae	BX12	BX12 sp014333425	cafe3e1470fa41376f7a69ccd3920984
1	Bacteria	Bacteroidota	Bacteroidia	Bacteroidales	Tannerellaceae	Parabacteroides	distasonis.1	7c41a6d0bdf667f6e82b19b7f0a86a19
1	Bacteria	Bacteroidota	Bacteroidia	Bacteroidales	Tannerellaceae	Parabacteroides	Parabacteroides sp003480915	40b654bc2254f5ddae7e528f9c0f6100
1	Bacteria	Actinobacteriota	Actinobacteria	Bifidobacteriales	Bifidobacteriaceae	Bifidobacterium	longum.5	49bcef8df8029b51c31e599bf34f32df
1	Bacteria	Proteobacteria	Gammaproteobacteria	Enterobacterales	Enterobacteriaceae	Klebsiella	pneumoniae.2	ff7742e8ae81884ad8b0c734a69837f3
1	Bacteria	Proteobacteria	Gammaproteobacteria	Enterobacterales	Enterobacteriaceae	Escherichia-Shigella	flexneri	7a2875fa2779432a85bc2663b1cd0ed3
1	Bacteria	Firmicutes	Bacilli	Lactobacillales	Streptococcaceae	Streptococcus	anginosus.1	2751acbe954577dc5c39574abe17cd9b
4	Bacteria	Firmicutes	Clostridia	Christensenellales	Christensenellaceae	Christensenellaceae R-7 group	Christensenellaceae R-7 group.2	fb2e43a3fe8a2da6f9832efdaa5b412e
1	Bacteria	Firmicutes_A	Clostridia	Lachnospirales	Lachnospiraceae	Enterocloster	Enterocloster sp.3.1	657967aad31527de494561e0ddbf3d20
1	Bacteria	Firmicutes	Clostridia	Lachnospirales	Lachnospiraceae	Lachnospiraceae NK4A136 group	Lachnospiraceae NK4A136 group.3	633f69fc1707732af9066320460e5f80
1	Bacteria	Firmicutes	Bacilli	Lactobacillales	Streptococcaceae	Streptococcus	lutetiensis.1	9e7125a102db8951720ec539b4e78113
1	Bacteria	Firmicutes	Clostridia	Lachnospirales	Lachnospiraceae	Lachnoclostridium	Lachnoclostridium.6	38551d71a4fe11826dd633e7e4f53d4a
1	Bacteria	Firmicutes_A	Clostridia	Clostridiales	Clostridiaceae	Clostridium	Clostridium sp.28	c3444336d3ae12ce854c79154e2825b6
1	Bacteria	Firmicutes_C	Negativicutes	Veillonellales	Dialisteraceae	Dialister	Dialister sp.2	8954856044dc31156803857144f6b482
1	Bacteria	Firmicutes	Bacilli	Staphylococcales	Staphylococcaceae	Staphylococcus	Staphylococcus.6	101c48cfe83f8cce71719a4514fcb35b
4	Bacteria	Firmicutes_A	Clostridia	Lachnospirales	Lachnospiraceae	GCA-900066135	GCA-900066135 sp.	05d757dba88ddd1e1e4e9974857a2b09
4	Bacteria	Firmicutes_A	Clostridia	TANB77	CAG-508	Family_CAG-508	Family_CAG-5084	d6fb5a6d274b2864d58729b26b6573e5
4	Bacteria	Firmicutes_A	Clostridia	Peptostreptococcales	Anaerovoracaceae	UBA1191	UBA1191 sp900066305	cb35c632053e8bf45078a2be22feb8b5
1	Bacteria	Firmicutes	Clostridia	Peptostreptococcales-Tissierellales	Family XI	Anaerococcus	vaginalis.4	0d66084d3828519247c0fa4536840277
1	Bacteria	Firmicutes	Clostridia	Lachnospirales	Lachnospiraceae	[Ruminococcus] gauvreauii group	[Ruminococcus] gauvreauii group.2	0728e4b97d855a44163697d5ab696019
1	Bacteria	Firmicutes	Bacilli	Lactobacillales	Enterococcaceae	Family_Enterococcaceae	Family_Enterococcaceae.9	b231b6caaf9771bef2404d960e1cb5b6
1	Bacteria	Bacteroidota	Bacteroidia	Bacteroidales	Bacteroidaceae	Bacteroides	vulgatus.4	011755eb178e98e08caf70b914473557
1	Bacteria	Firmicutes	Bacilli	Lactobacillales	Carnobacteriaceae	Granulicatella	Granulicatella	dd68c7b3d6b665f362d388f2f1be6663
4	Bacteria	Firmicutes_A	Clostridia	Lachnospirales	Lachnospiraceae	Blautia_A	Blautia_A sp900066505	105344b0b04df4d06036c8c91f439255
1	Bacteria	Proteobacteria	Gammaproteobacteria	Enterobacterales	Enterobacteriaceae	Escherichia-Shigella	Escherichia-Shigella.4	faa381bb2595401f215dd69c372d6a10
1	Bacteria	Firmicutes	Bacilli	Lactobacillales	Streptococcaceae	Streptococcus	pneumoniae.3	8e662c105abda24419a09c3ff80d5523
4	Bacteria	Firmicutes	Clostridia	Lachnospirales	Lachnospiraceae	Agathobacter	Agathobacter.4	25af29e1b2d121f8aae468d270d75518
2	Bacteria	Firmicutes	Negativicutes	Veillonellales-Selenomonadales	Veillonellaceae	Megasphaera	micronuciformis.1	1dedf6168635e26c1f3aa0c35fa96e79
1	Bacteria	Proteobacteria	Gammaproteobacteria	Enterobacterales	Enterobacteriaceae	Raoultella	planticola.1	df6f296f8842ebe01cf1ea093c2743a4
1	Bacteria	Firmicutes	Negativicutes	Veillonellales-Selenomonadales	Veillonellaceae	Veillonella	Veillonella.3	d3ac739c39e68961fccf901cd0a55adc
1	Bacteria	Proteobacteria	Gammaproteobacteria	Enterobacterales	Enterobacteriaceae	Escherichia-Shigella	coli.4	c4c62ab2923c7e18b08afb2c40808b0c
1	Bacteria	Firmicutes	Negativicutes	Veillonellales-Selenomonadales	Veillonellaceae	Veillonella	dispar.1	62c797b0115a0e52b3e8b52dba18cb97
1	Bacteria	Actinobacteriota	Actinobacteria	Bifidobacteriales	Bifidobacteriaceae	Bifidobacterium	longum.6	6ea9848764486191acca8483af75df5a
2	Bacteria	Firmicutes	Clostridia	Lachnospirales	Lachnospiraceae	Blautia	Blautia.10	5a5487cfa28476bc1231e24e68e8aaad
1	Bacteria	Bacteroidota	Bacteroidia	Bacteroidales	Bacteroidaceae	Bacteroides	Bacteroides eggerthii	463ccc4044935acfa08235ade550557e
4	Bacteria	Firmicutes_A	Clostridia	Oscillospirales	Oscillospiraceae	Dysosmobacter	Dysosmobacter sp001916835	7880b17b21da81ac4f5ca979cdbf52a6
1	Bacteria	Firmicutes	Bacilli	Erysipelotrichales	Erysipelatoclostridiaceae	Catenibacterium	Catenibacterium mitsuokai/sp000437715	9352e570a182123f48d92df829d0fcf0
1	Bacteria	Proteobacteria	Gammaproteobacteria	Xanthomonadales	Xanthomonadaceae	Stenotrophomonas	maltophilia.1	edb820a8dfbb79bff3e86b0def91cada
1	Bacteria	Firmicutes	Clostridia	Oscillospirales	Ruminococcaceae	Subdoligranulum	Subdoligranulum.1	9b6143f481836fc88f44d25268bb728d
1	Bacteria	Patescibacteria	Saccharimonadia	Saccharimonadales	Saccharimonadales	Saccharimonadales	Saccharimonadales.2	e2b504d4626c82975ca7ae8d285e965c
4	Bacteria	Firmicutes_A	Clostridia	Oscillospirales	Ruminococcaceae	Gemmiger	Gemmiger sp900540595	c6fdf631c16099e62a83c66db8a7a6f1
1	Bacteria	Firmicutes	Bacilli	Staphylococcales	Staphylococcaceae	Staphylococcus	Staphylococcus.7	c6b516ae2ba507f85cf0eede12bfa499
4	Bacteria	Firmicutes_A	Clostridia	Lachnospirales	Lachnospiraceae	Coprococcus_A	Coprococcus_A catus	bc9350a59b80d8d6ba12aa3b47ef571d
2	Bacteria	Actinobacteriota	Coriobacteriia	Coriobacteriales	Eggerthellaceae	Gordonibacter	Gordonibacter	f910f7aa24b31f411c92bc7348a258fb
1	Bacteria	Actinobacteriota	Coriobacteriia	Coriobacteriales	Atopobiaceae	Libanicoccus	Libanicoccus	42703e86b54bab7573e103e166644396
1	Bacteria	Firmicutes_A	Clostridia	Oscillospirales	Acutalibacteraceae	Ruminococcus_E	Ruminococcus_E sp.	ed3100e8701bc58ddd1cecbdccef19e0
1	Bacteria	Firmicutes	Clostridia	Lachnospirales	Lachnospiraceae	Sellimonas	Sellimonas.1	53f5ff39a7d95bf77b3f03799a22e2cf
1	Bacteria	Actinobacteriota	Actinobacteria	Bifidobacteriales	Bifidobacteriaceae	Bifidobacterium	breve.5	d58f772f0771ea16b61880aa52add543
2	Bacteria	Firmicutes	Bacilli	Erysipelotrichales	Erysipelatoclostridiaceae	Faecalibacillus	Faecalibacillus faecis/intestinalis/sp900762515	7f30e55f47b5c6b6e1c8803416421a67
1	Bacteria	Firmicutes	Bacilli	Staphylococcales	Staphylococcaceae	Staphylococcus	caprae.4	31e41554260b7a729bc77c776c71ab4b
1	Bacteria	Proteobacteria	Gammaproteobacteria	Pseudomonadales	Pseudomonadaceae	Pseudomonas	yamanorum	5ebe646d37923d379c227d423ee2bb83
1	Bacteria	Bacteroidota	Bacteroidia	Bacteroidales	Tannerellaceae	Parabacteroides	Parabacteroides sp.31.2	d9dc94eda8cf1d2c283009f6a3e4532e
4	Bacteria	Firmicutes_A	Clostridia	Lachnospirales	Lachnospiraceae	Eubacterium_F	Eubacterium_F sp.3	c18dae5503801a39d3adaf67ecee7a9a
1	Bacteria	Actinobacteriota	Coriobacteriia	Coriobacteriales	Eggerthellaceae	Enterorhabdus	Enterorhabdus.1	134d27c5f6a976ed0421b8e0581d4696
1	Bacteria	Firmicutes	Clostridia	Lachnospirales	Lachnospiraceae	[Ruminococcus] gnavus group	[Ruminococcus] gnavus group.2	85759ff340577b75c7e97b5f7002b561
4	Bacteria	Firmicutes_A	Clostridia	Oscillospirales	UBA644	UBA644	UBA644 sp.	77c40f52ef7968ba8fa93eb2000a051a
2	Bacteria	Firmicutes_A	Clostridia	Lachnospirales	Lachnospiraceae	Faecalimonas	Faecalimonas umbilicata.2	1ce2e0bdb5cd91789535fdcf206e6cd5
4	Bacteria	Firmicutes_A	Clostridia	Lachnospirales	Lachnospiraceae	Mediterraneibacter	Mediterraneibacter sp.2.1	93b58b0ba0d326e9c8d1a81f8672c16a
1	Bacteria	Firmicutes	Bacilli	Erysipelotrichales	Erysipelatoclostridiaceae	Faecalibacillus	Faecalibacillus faecis/intestinalis/sp900762515.1	f77a02d22327e5e2fab9f6e45f34813b
1	Bacteria	Firmicutes	Bacilli	Erysipelotrichales	Erysipelatoclostridiaceae	Faecalibacillus	Faecalibacillus faecis/intestinalis/sp900762515.2	c0000614329bd30033499fcb013aff8e
1	Bacteria	Bacteroidota	Bacteroidia	Bacteroidales	Bacteroidaceae	Bacteroides	vulgatus.5	d2d8042bee2e0aa9ff2a0d61a9f717d6
1	Bacteria	Firmicutes	Clostridia	Lachnospirales	Lachnospiraceae	Lachnospiraceae	Lachnospiraceae.2	e1ef9116195a16daee5b072236916a72
4	Bacteria	Firmicutes_A	Clostridia	Lachnospirales	Lachnospiraceae	Dorea_A	Dorea_A sp.	d7fa8669f42b4d70554dc6ac0c3ed5fb
1	Bacteria	Firmicutes_A	Clostridia	Lachnospirales	Lachnospiraceae	Enterocloster	Enterocloster sp900540675	450a0ac618f607c0a7887cb63509d9f9
1	Bacteria	Firmicutes	Bacilli	Staphylococcales	Staphylococcaceae	Staphylococcus	haemolyticus.1	f9a62a9e07d6f039689f94ba26553d65
1	Bacteria	Bacteroidota	Bacteroidia	Bacteroidales	Bacteroidaceae	Bacteroides	stercoris	c79cd2fe14180797a678f5fbe4d37751
1	Bacteria	Firmicutes	Bacilli	Lactobacillales	Streptococcaceae	Streptococcus	salivarius.10	c68079dcd6ef41194cd9f40dbdcdffc5
4	Bacteria	Firmicutes_A	Clostridia	Peptostreptococcales	Peptostreptococcaceae	Intestinibacter	Intestinibacter bartlettii	9eaff8c3aca7b74962decea682803d9c
1	Bacteria	Firmicutes	Bacilli	Staphylococcales	Staphylococcaceae	Staphylococcus	caprae.5	c5ecf18f9f280ccf265548e62d7f9678
1	Bacteria	Firmicutes	Bacilli	Lactobacillales	Enterococcaceae	Family_Enterococcaceae	Family_Enterococcaceae.10	f4aac2eaa0ace9fa3bfd959d22aecbcb
1	Bacteria	Firmicutes	Bacilli	Lactobacillales	Lactobacillaceae	Lacticaseibacillus	Lacticaseibacillus sp.2	b117c33a485e82e049b23500493c7c28
1	Bacteria	Proteobacteria	Gammaproteobacteria	Enterobacterales	Enterobacteriaceae	Escherichia-Shigella	Escherichia-Shigella.5	70820dee8ccfd5695e5c3bf30fc09860
1	Bacteria	Firmicutes	Clostridia	Lachnospirales	Lachnospiraceae	Fusicatenibacter	Fusicatenibacter	c811c429722420ed4f8ac32df555925b
1	Bacteria	Firmicutes	Clostridia	Lachnospirales	Lachnospiraceae	[Ruminococcus] gnavus group	[Ruminococcus] gnavus group.3	a8ed78934b7f8d9a3e415eb23f8a6715
1	Bacteria	Firmicutes	Clostridia	Lachnospirales	Lachnospiraceae	Dorea	Dorea.2	a6f8ccfdcdcbb85ad979ccabafd3d166
1	Bacteria	Firmicutes_A	Clostridia	Oscillospirales	Ruminococcaceae	UBA1394	UBA1394 sp900066845	a3b2f9569c4101cd3847b375de33999c
1	Bacteria	Patescibacteria	Saccharimonadia	Saccharimonadales	Saccharimonadales	Saccharimonadales	Saccharimonadales.3	119b3ba9fec0e0a01c4fb3a48abab2b8
2	Bacteria	Firmicutes_A	Clostridia	Oscillospirales	Butyricicoccaceae	Agathobaculum	Agathobaculum sp..1	fb598993585035f92fc2b4518e8bf25b
1	Bacteria	Firmicutes	Bacilli	Lactobacillales	Streptococcaceae	Streptococcus	salivarius.11	9b9440d4615547b6840e83473e6c3d5e
1	Bacteria	Bacteroidota	Bacteroidia	Bacteroidales	Bacteroidaceae	Bacteroides	vulgatus.6	8026bb128fc3cd0dab03f8c1dbfac215
1	Bacteria	Firmicutes	Bacilli	Staphylococcales	Staphylococcaceae	Staphylococcus	Staphylococcus.8	e2463748142c5da4d9534e696c9e394c
1	Bacteria	Firmicutes	Bacilli	Staphylococcales	Staphylococcaceae	Staphylococcus	aureus.1	8b05e3b91d231eeedf28ef8cd1bfc773
4	Bacteria	Actinobacteriota	Coriobacteriia	Coriobacteriales	Eggerthellaceae	Adlercreutzia	Adlercreutzia celatus_A/equolifaciens	f3334277a73d2f16250b03e6a875c383
1	Bacteria	Firmicutes	Clostridia	Lachnospirales	Lachnospiraceae	Anaerostipes	hadrus.6	fb444d347023a8c85c8c629b2ebe9b12
1	Bacteria	Actinobacteriota	Actinobacteria	Bifidobacteriales	Bifidobacteriaceae	Bifidobacterium	catenulatum.2	fbf49f02e2d302cc40d7d3df1858646a
1	Bacteria	Firmicutes	Clostridia	Lachnospirales	Lachnospiraceae	Agathobacter	Agathobacter.5	2706af05c150bd985e39af4e13809a23
1	Bacteria	Firmicutes_C	Negativicutes	Veillonellales	Dialisteraceae	Dialister	Dialister sp.3	65290e94ac951b26f6afe6bdd7b42207
1	Bacteria	Firmicutes	Clostridia	Clostridiales	Clostridiaceae	Clostridium sensu stricto 1	Clostridium sensu stricto 1.2	89f7c239c92340045f818a740e1acecb
1	Bacteria	Firmicutes	Clostridia	Peptostreptococcales-Tissierellales	Family XI	Anaerococcus	hydrogenalis.2	65280be73b07fdf138b8e9e155894d23
1	Bacteria	Actinobacteriota	Actinomycetia	Actinomycetales	Bifidobacteriaceae	Bifidobacterium	Bifidobacterium dentium/moukalabense.2	6c2d19b1f93bb05af4652da117fab03a
1	Bacteria	Firmicutes	Bacilli	Lactobacillales	Lactobacillaceae	Lactobacillus	amylovorus	4f97d4f3c02ad03594fe71fbb3b70764
1	Bacteria	Firmicutes	Clostridia	Lachnospirales	Lachnospiraceae	Blautia	Blautia.11	4228aedb5e99c2607fd8fc70d5e7d2c8
1	Bacteria	Firmicutes	Clostridia	Lachnospirales	Lachnospiraceae	Blautia	obeum.1	ea414c99363d4f3117c1e95189400cad
4	Bacteria	Bacteroidota	Bacteroidia	Bacteroidales	Bacteroidaceae	Bacteroides	Bacteroides stercoris	f1681bcc5274382eaf70ad85491c837e
4	Bacteria	Bacteroidota	Bacteroidia	Bacteroidales	UBA11471	UBA11471	UBA11471 sp.4	6343c15ef6a0b28bb8d019ebbcd0a55a
4	Bacteria	Bacteroidota	Bacteroidia	Bacteroidales	Bacteroidaceae	Bacteroides	thetaiotaomicron.1	01ee9b2cf2da4ce04fcc4fae00a10d61
1	Bacteria	Proteobacteria	Gammaproteobacteria	Enterobacterales	Pasteurellaceae	Haemophilus	parainfluenzae	d555464f3bed488d208554400b6d216d
1	Bacteria	Firmicutes	Negativicutes	Veillonellales-Selenomonadales	Veillonellaceae	Veillonella	ratti.5	d00323b0389ac1d3dbcc08cdca2b614f
1	Bacteria	Firmicutes	Negativicutes	Veillonellales-Selenomonadales	Veillonellaceae	Veillonella	atypica.5	d8a144b26cf18532fea593b1fa42ce57
1	Bacteria	Proteobacteria	Gammaproteobacteria	Enterobacterales	Enterobacteriaceae	Enterobacteriaceae	Enterobacteriaceae	924b46546ae7b885a2d5b36bcc514dfd
1	Bacteria	Bacteroidota	Bacteroidia	Bacteroidales	Bacteroidaceae	Bacteroides	uniformis.3	7c904af59c213b82d06819fcb34ac52b
4	Bacteria	Firmicutes_A	Clostridia	Oscillospirales	Oscillospiraceae	Dysosmobacter	Dysosmobacter sp001916835.1	e15b6ef1cd643dff3f0649b7baba06e8
1	Bacteria	Firmicutes	Bacilli	Staphylococcales	Staphylococcaceae	Staphylococcus	Staphylococcus.9	ea09b754a81748fb2accd1ed0554308f
1	Bacteria	Firmicutes	Clostridia	Lachnospirales	Lachnospiraceae	[Ruminococcus] torques group	[Ruminococcus] torques group.2	4c26122c36a3b0688b42e762f2f4ba40
4	Bacteria	Firmicutes	Clostridia	Lachnospirales	Lachnospiraceae	[Ruminococcus] torques group	[Ruminococcus] torques group.3	064e8efe1febb870ec77a609793361dc
2	Bacteria	Firmicutes	Bacilli	Lactobacillales	Enterococcaceae	Enterococcus_A	Enterococcus_A avium/florum/gilvus/hermanniensis/malodoratus/pallens/pseudoavium/raffinosus/sp005405205/viikkiensis/xiangfangensis.3	b05b59bf2a816cf4d1655d3d34a06f90
4	Bacteria	Firmicutes_A	Clostridia	Oscillospirales	Oscillospiraceae	Flavonifractor	Flavonifractor plautii/sp000508885.1	cb0ae3f7f79c995e95e8cf343c7155a9
2	Bacteria	Proteobacteria	Gammaproteobacteria	Enterobacterales	Enterobacteriaceae	Citrobacter	braakii	4965ec28563a149dd7acc75de0f5f9b2
1	Bacteria	Actinobacteriota	Actinomycetia	Actinomycetales	Actinomycetaceae	Winkia	Winkia neuii/sp002849225.1	df00a26a92b81a84613a64148abbfd51
1	Bacteria	Bacteroidota	Bacteroidia	Bacteroidales	Tannerellaceae	Parabacteroides	Parabacteroides sp.31.3	bfe9726fb5629f9e96b2160176fbeb52
1	Bacteria	Firmicutes	Bacilli	Lactobacillales	Lactobacillaceae	Limosilactobacillus	Limosilactobacillus vaginalis	fed30d6b474008c8c2cd39c47126f7b9
1	Bacteria	Firmicutes	Clostridia	Oscillospirales	Ruminococcaceae	Faecalibacterium	Faecalibacterium.3	1eaa84dcb33b46f9a8613a40c50ea22a
4	Bacteria	Firmicutes_A	Clostridia	Peptostreptococcales	Anaerovoracaceae	CAG-238	CAG-238 sp900542245	b3d9e1f59bd4584a0601d913f3e153ff
4	Bacteria	Firmicutes	Clostridia	Lachnospirales	Lachnospiraceae	Roseburia	intestinalis	d91b5c77b23b27230a16c7dc4325f4cd
1	Bacteria	Firmicutes	Clostridia	Oscillospirales	Ruminococcaceae	Incertae Sedis	Incertae Sedis.1	8a34842f23856fd163fc4190c9a82c8f
4	Bacteria	Firmicutes	Clostridia	Peptostreptococcales-Tissierellales	Anaerovoracaceae	Family XIII AD3011 group	Family XIII AD3011 group	e665d8838b433fc9698778c0817bb6fd
1	Bacteria	Proteobacteria	Gammaproteobacteria	Burkholderiales	Burkholderiaceae	Parasutterella	Parasutterella excrementihominis/sp000980495	b05cb6d606346e0838a1658e7f5d81cf
4	Bacteria	Firmicutes_A	Clostridia	Lachnospirales	Lachnospiraceae	Blautia	Blautia stercoris	9710ba1f3be2b4b6efbf06b9feccfc7a
1	Bacteria	Firmicutes_A	Clostridia	Oscillospirales	Ruminococcaceae	Ruminococcus_D	Ruminococcus_D bicirculans	05d429713db038fa66aa06f0a08f84d9
1	Bacteria	Proteobacteria	Gammaproteobacteria	Enterobacterales	Enterobacteriaceae	Escherichia-Shigella	coli.5	c23b30c6515c4a5031f9e0d8cb3d0b05
2	Bacteria	Firmicutes	Clostridia	Eubacteriales	Eubacteriaceae	Eubacterium	limosum	2215fda718f2798e7e94648af4e01b1c
4	Bacteria	Firmicutes	Clostridia	Oscillospirales	Ruminococcaceae	Ruminococcaceae	Ruminococcaceae	0e399ae123e660e201b9e4102472a9e8
1	Bacteria	Firmicutes	Clostridia	Lachnospirales	Lachnospiraceae	[Ruminococcus] gnavus group	[Ruminococcus] gnavus group.4	5fe49665a91e42bce3954dffe8fe5c8e
2	Bacteria	Firmicutes	Negativicutes	Veillonellales-Selenomonadales	Veillonellaceae	Megasphaera	micronuciformis.2	f7976d8feb00b1ba2f32fd8211cfb0fd
1	Bacteria	Firmicutes	Clostridia	Lachnospirales	Lachnospiraceae	[Eubacterium] hallii group	hallii	727e9a6186f47cac563ff9d77024cb4c
1	Bacteria	Proteobacteria	Gammaproteobacteria	Enterobacterales	Enterobacteriaceae	Escherichia-Shigella	Escherichia-Shigella.6	84aaf91051b3cae1db2b637da37c5c59
1	Bacteria	Firmicutes	Bacilli	Lactobacillales	Streptococcaceae	Streptococcus	salivarius.12	46c5988b0a94330782ebb790608ede6d
2	Bacteria	Firmicutes	Negativicutes	Veillonellales-Selenomonadales	Veillonellaceae	Veillonella	atypica.6	3940a350430d910b62071c816ed954a6
1	Bacteria	Actinobacteriota	Coriobacteriia	Coriobacteriales	Eggerthellaceae	Senegalimassilia	Senegalimassilia anaerobia.1	781430c159ecc011923a6d1e212e1a96
1	Bacteria	Bacteroidota	Bacteroidia	Bacteroidales	Muribaculaceae	SFTJ01	SFTJ01 sp.4	049abd9f0f9a0d26b4205dbad6e7ed89
1	Bacteria	Proteobacteria	Gammaproteobacteria	Enterobacterales	Enterobacteriaceae	Klebsiella	Klebsiella.2	3bb4035cde6460af789561ab0f27fe51
1	Bacteria	Firmicutes	Clostridia	Lachnospirales	Lachnospiraceae	Fusicatenibacter	Fusicatenibacter.1	97b5344d1f74180574c7eccef8435871
1	Bacteria	Firmicutes	Negativicutes	Veillonellales-Selenomonadales	Veillonellaceae	Veillonella	parvula.7	dc30070bc1b453c2fa1e4c0f115085ce
1	Bacteria	Bacteroidota	Bacteroidia	Bacteroidales	Bacteroidaceae	Bacteroides	fragilis.2	53a29b0ea9f39c6d33e676e1b590ac31
1	Bacteria	Firmicutes	Bacilli	Lactobacillales	Streptococcaceae	Streptococcus	salivarius.13	174397c0a4edeb2d088d677cecfcb8d1
1	Bacteria	Firmicutes	Bacilli	Lactobacillales	Lactobacillaceae	Lactobacillus	gasseri.2	0662cbe593269afd509474ed5ad858b9
4	Bacteria	Firmicutes	Clostridia	Oscillospirales	Ruminococcaceae	Ruminococcaceae	Ruminococcaceae.1	02aaade0e0c17068a8061682592b8986
4	Bacteria	Proteobacteria	Gammaproteobacteria	Burkholderiales	Burkholderiaceae	Sutterella	Sutterella sp900752815/wadsworthensis_A	dfc82561fb6ae5e03d37d5250f700a6b
4	Bacteria	Bacteroidota	Bacteroidia	Bacteroidales	Bacteroidaceae	Bacteroides	caccae	37453085adfe208e105f0236b407f59a
1	Bacteria	Proteobacteria	Gammaproteobacteria	Enterobacterales	Enterobacteriaceae	Enterobacteriaceae	Enterobacteriaceae.1	ae2eeeb87431ae4ef2cd38c1865cb52e
1	Bacteria	Bacteroidota	Bacteroidia	Bacteroidales	Barnesiellaceae	Coprobacter	secundus	e8208f6a61ab5f50ccb199d1131d0a0c
1	Bacteria	Bacteroidota	Bacteroidia	Bacteroidales	Porphyromonadaceae	Porphyromonas	Porphyromonas	3c3c05b27064591a63bdabfe89ee6022
1	Bacteria	Firmicutes	Clostridia	Clostridiales	Clostridiaceae	Clostridium sensu stricto 1	perfringens.1	5258e1b2d31ba12024b62e96f3285947
4	Bacteria	Firmicutes_A	Clostridia	Lachnospirales	Lachnospiraceae	Family_Lachnospiraceae	Family_Lachnospiraceae4	3765e2593d6bb766afd8bf563841dfa7
1	Bacteria	Firmicutes	Clostridia	Oscillospirales	Ruminococcaceae	Faecalibacterium	prausnitzii.7	866b24f6c48b9bc14d3b9eb6b51e2fd3
1	Bacteria	Bacteroidota	Bacteroidia	Bacteroidales	Tannerellaceae	Parabacteroides	Parabacteroides sp.17	8aa41b492a6b70ae97e036f13e114ce2
4	Bacteria	Firmicutes_A	Clostridia	Lachnospirales	Lachnospiraceae	Blautia_A	Blautia_A faecis	af2150fef76b295092cd60a788cbe500
4	Bacteria	Firmicutes_A	Clostridia	Lachnospirales	Lachnospiraceae	Enterocloster	Enterocloster asparagiformis/lavalensis	2afd81e05992550f91838c57bdeb8158
1	Bacteria	Firmicutes_C	Negativicutes	Veillonellales	Megasphaeraceae	Megasphaera	Megasphaera elsdenii/sp000417505.1	48c073479d6e40559b74d7fa6207e0f4
1	Bacteria	Firmicutes_A	Clostridia	Oscillospirales	Oscillospiraceae	CAG-83	CAG-83 sp900545585	2af476270553eced4995d904584bfd12
2	Bacteria	Firmicutes	Clostridia	Lachnospirales	Lachnospiraceae	Blautia	Blautia.12	cd25c9c486137cca62414185d3af0950
1	Bacteria	Firmicutes	Clostridia	Clostridiales	Clostridiaceae	Clostridium sensu stricto 1	perfringens.2	3c254b40372a5ed2d3c264111967b290
1	Bacteria	Bacteroidota	Bacteroidia	Bacteroidales	Bacteroidaceae	Bacteroides	fragilis.3	f330a8d2204597dbe97585c4185570bd
1	Bacteria	Firmicutes_A	Clostridia	Clostridiales	Clostridiaceae	Clostridium_P	Clostridium_P perfringens	813d91a36c6802a6142248d6ba0d8fe0
4	Bacteria	Firmicutes_A	Clostridia	Oscillospirales	Oscillospiraceae	CAG-110	CAG-110 sp.4	ac1d4e46240660a75dd561498d1c50df
1	Bacteria	Firmicutes	Bacilli	Lactobacillales	Streptococcaceae	Lactococcus	Lactococcus hampsonii_B/lactis/lactis_A/lactis_E/sp003627095/sp004210295/sp006965445	c37c5234ec770d4fc618ea611bb93d64
1	Bacteria	Bacteroidota	Bacteroidia	Bacteroidales	Rikenellaceae	Alistipes	finegoldii.2	2b3ecd3585af4d0b8c91ad3ea43e8bec
1	Bacteria	Firmicutes	Bacilli	Staphylococcales	Staphylococcaceae	Staphylococcus	epidermidis	43f4e97237c9c2494759cdf1ea5f366f
4	Bacteria	Firmicutes_A	Clostridia	Lachnospirales	Lachnospiraceae	Ruminococcus_A	Ruminococcus_A faecicola	16d4ea99379a4e5ebf3f820357a9ec12
4	Bacteria	Firmicutes_A	Clostridia	Lachnospirales	Lachnospiraceae	Anaerobutyricum	Anaerobutyricum sp.5.1	e23e6e753f8771cd5e00282399b8e86b
1	Bacteria	Proteobacteria	Gammaproteobacteria	Enterobacterales	Pasteurellaceae	Haemophilus	parainfluenzae.1	348f7b3b4473369b1e3230c94b27aaf5
4	Bacteria	Firmicutes_A	Clostridia	Oscillospirales	Oscillospiraceae	Lawsonibacter	Lawsonibacter asaccharolyticus	d1cf1d11d3e2b5a8fe82b718b6fadc2d
4	Bacteria	Firmicutes_A	Clostridia	Oscillospirales	Ruminococcaceae	Ruminococcus_D	Ruminococcus_D bicirculans.1	ce9d40c1e69dbd1dfc0fa93964b3d4a2
1	Bacteria	Firmicutes	Bacilli	Lactobacillales	Lactobacillaceae	Limosilactobacillus	Limosilactobacillus	e4b8057c9bf8b151d86e30a505b89819
1	Bacteria	Proteobacteria	Gammaproteobacteria	Enterobacterales	Enterobacteriaceae	Klebsiella	oxytoca.2	1d2ad94e29f958bb8a3166d3dd57f549
1	Bacteria	Bacteroidota	Bacteroidia	Bacteroidales	Bacteroidaceae	Phocaeicola	Phocaeicola plebeius_A	1f0481c4fc1ddc5a118dd691b40a1670
1	Bacteria	Firmicutes	Negativicutes	Veillonellales-Selenomonadales	Veillonellaceae	Veillonella	parvula.8	e0d1e3fa2e10e95e235a220259e73b2c
1	Bacteria	Firmicutes_A	Clostridia	Lachnospirales	Lachnospiraceae	Anaerobutyricum	Anaerobutyricum soehngenii	e9340d7000d154b78dae3ad8fbc4ad27
2	Bacteria	Firmicutes	Clostridia	Lachnospirales	Lachnospiraceae	Lachnospiraceae	Lachnospiraceae.3	89855f3f17af3f584f07cf2e17a13df9
4	Bacteria	Firmicutes	Clostridia	Christensenellales	Christensenellaceae	Christensenellaceae R-7 group	Christensenellaceae R-7 group.3	e14873c10af4c3fb7a068f0d96a98f23
2	Bacteria	Verrucomicrobiota	Verrucomicrobiae	Verrucomicrobiales	Akkermansiaceae	Akkermansia	muciniphila	b8349e5459469537ac814c90cb3b99fa
4	Bacteria	Firmicutes	Clostridia	Lachnospirales	Lachnospiraceae	Blautia	Blautia.13	b4dba10e10429ca35c466ea72712efcb
4	Bacteria	Firmicutes	Bacilli	Erysipelotrichales	Erysipelotrichaceae	Holdemania	massiliensis.2	11ab9631d9670c69d52bdaa9ae52a696
1	Bacteria	Firmicutes	Bacilli	Staphylococcales	Staphylococcaceae	Staphylococcus	Staphylococcus.10	45d14804d2540d0ee21b2ac798ce7f8f
1	Bacteria	Proteobacteria	Gammaproteobacteria	Enterobacterales	Enterobacteriaceae	Citrobacter	freundii.1	86ea504d27d70c803d87ee6f04bcbaaf
1	Bacteria	Actinobacteriota	Actinobacteria	Actinomycetales	Actinomycetaceae	Actinomycetaceae	Actinomycetaceae	ad5ef4ca853cc1aef65665d5ce4e0f46
1	Bacteria	Firmicutes	Negativicutes	Veillonellales-Selenomonadales	Veillonellaceae	Veillonella	Veillonella.4	d50b9c5bf40397a411c56e54a33ea23c
2	Bacteria	Actinobacteriota	Actinobacteria	Bifidobacteriales	Bifidobacteriaceae	Bifidobacterium	pseudolongum	1de19b0d7a171cdd32b4dff524e87db2
1	Bacteria	Firmicutes	Clostridia	Clostridiales	Clostridiaceae	Clostridium sensu stricto 1	Clostridium sensu stricto 1.3	01c124b7490379bb0ac3f188bc86adbe
4	Bacteria	Firmicutes_A	Clostridia	Lachnospirales	Lachnospiraceae	Dorea	Dorea formicigenerans	edc06e5f20535c71071803ccc27290d8
1	Bacteria	Proteobacteria	Gammaproteobacteria	Enterobacterales	Enterobacteriaceae	Yersinia	Yersinia aldovae/aleksiciae/aquatilis/aquatilis_B/bercovieri/enterocolitica/enterocolitica_E/enterocolitica_F/enterocolitica_H/frederiksenii/frederiksenii_C/grimesii/hibernica/intermedia/kristensenii/kristensenii_B/kristensenii_C/liquefaciens/massiliensis/mollaretii/pekkanenii/pestis/plymuthica/plymuthica_A/proteamaculans_D/quinivorans/rohdei/similis/sp000743355	1d227e916d8cd8bd01f91a6c81a83dad
4	Bacteria	Firmicutes_A	Clostridia	Peptostreptococcales	Anaerovoracaceae	Family_Anaerovoracaceae	Family_Anaerovoracaceae	7842a433c5c0271371dba64a011c2d4b
1	Bacteria	Proteobacteria	Gammaproteobacteria	Xanthomonadales	Xanthomonadaceae	Stenotrophomonas	maltophilia.2	0ca1de0b0d71831974a9aa9516f27dfc
1	Bacteria	Firmicutes	Bacilli	Lactobacillales	Lactobacillaceae	Limosilactobacillus	Limosilactobacillus antri/frumenti/oris/panis/reuteri/reuteri_D/reuteri_E/sp014145435/sp014145545/sp014145615/sp900156885/vaginalis_A.1	46e7ca06ebd86af5c5860b44c4dae817
2	Bacteria	Actinobacteriota	Coriobacteriia	Coriobacteriales	Eggerthellaceae	Eggerthella	Eggerthella lenta	b17b0c708069207e114ebcf8946a7421
4	Bacteria	Firmicutes	Clostridia	Lachnospirales	Lachnospiraceae	Anaerostipes	Anaerostipes.1	1e00db7be0890911b95ab4992a4118cc
1	Bacteria	Firmicutes	Negativicutes	Veillonellales-Selenomonadales	Veillonellaceae	Megasphaera	micronuciformis.3	be149175d3777147a1c60caa8a78a0c0
1	Bacteria	Firmicutes	Clostridia	Lachnospirales	Lachnospiraceae	Tyzzerella	Tyzzerella.1	19928b1dedb9d69e1eb0a13ede17b471
1	Bacteria	Firmicutes	Bacilli	Lactobacillales	Lactobacillaceae	Lacticaseibacillus	Lacticaseibacillus casei/chiayiensis/paracasei/zeae	11e9e61ba69136385f0ab244388b4add
1	Bacteria	Firmicutes	Clostridia	Lachnospirales	Lachnospiraceae	[Eubacterium] hallii group	hallii.1	637dc652cbba09a90f0877432187982e
2	Bacteria	Firmicutes	Clostridia	Lachnospirales	Lachnospiraceae	Lachnoclostridium	Lachnoclostridium.7	1b780a8f4f2ab9e6250a1557dd71eee1
1	Bacteria	Firmicutes	Bacilli	Lactobacillales	Streptococcaceae	Streptococcus	Streptococcus.4	ba4ab8dea6b4223dbc9ed5bbf3ea60ea
1	Bacteria	Firmicutes_A	Clostridia	Lachnospirales	Lachnospiraceae	Faecalimonas	Faecalimonas umbilicata.3	7b6fd5bf30f93cab63456eb20d7e0d67
1	Bacteria	Actinobacteriota	Coriobacteriia	Coriobacteriales	Eggerthellaceae	Senegalimassilia	Senegalimassilia anaerobia.2	4335c6f17291687871b83669d14f6cce
4	Bacteria	Bacteroidota	Bacteroidia	Bacteroidales	Rikenellaceae	Tidjanibacter	Tidjanibacter inops_A	af3909edeceab197f554e240fe97af83
1	Bacteria	Proteobacteria	Gammaproteobacteria	Pseudomonadales	Pseudomonadaceae	Pseudomonas	protegens	5f8bc9840120e2fcddfb562429e6f0eb
1	Bacteria	Actinobacteriota	Coriobacteriia	Coriobacteriales	Coriobacteriales Incertae Sedis	Coriobacteriales Incertae Sedis	Coriobacteriales Incertae Sedis.1	bd636d8da2dca9bb0b1aa1da7e88890d
4	Bacteria	Firmicutes_A	Clostridia	Oscillospirales	Ruminococcaceae	Ruminococcus_C	Ruminococcus_C callidus	96ed6cb0d5f3bea4c7d87104acc9052d
1	Bacteria	Firmicutes	Clostridia	Lachnospirales	Lachnospiraceae	Fusicatenibacter	Fusicatenibacter.2	c28ee8e9970dcbc01a6aa54b3e311ee7
1	Bacteria	Firmicutes_A	Clostridia	Peptostreptococcales	Peptostreptococcaceae	Terrisporobacter	Terrisporobacter othiniensis	3ac77bc1410516ad7fa3a526b862d0e7
4	Bacteria	Firmicutes_A	Clostridia	Oscillospirales	CAG-272	UMGS1815	UMGS1815 sp.3	dd605b93c280c3705147c55e6de27827
4	Bacteria	Firmicutes_A	Clostridia	Oscillospirales	Ruminococcaceae	Gemmiger	Gemmiger sp.13.1	d331c54836ce2164d5d51154f369d9a4
2	Bacteria	Firmicutes	Negativicutes	Veillonellales-Selenomonadales	Veillonellaceae	Veillonella	ratti.6	78c5607a490288b6e534cde0066c2961
1	Bacteria	Firmicutes	Clostridia	Lachnospirales	Lachnospiraceae	Tyzzerella	Tyzzerella.2	8449dcdc72338abb3b8f164de5d9d1a4
1	Bacteria	Proteobacteria	Gammaproteobacteria	Enterobacterales	Enterobacteriaceae	Escherichia-Shigella	coli.6	eb790c92f697619b7280746197561a93
2	Bacteria	Firmicutes	Bacilli	Lactobacillales	Streptococcaceae	Streptococcus	salivarius.14	c1268bb31706ff2d63b7db036ff26e56
1	Bacteria	Firmicutes	Bacilli	Lactobacillales	Lactobacillaceae	Lactobacillus	gasseri.3	9658a85542ead6335bf992689017e22f
4	Bacteria	Firmicutes_A	Clostridia	Lachnospirales	Lachnospiraceae	Blautia_A	Blautia_A massiliensis/schinkii/sp003474435/sp900066205/sp900066335.1	4595db49426fb88614f6d6e90d952ae9
1	Bacteria	Actinobacteriota	Actinobacteria	Bifidobacteriales	Bifidobacteriaceae	Bifidobacterium	longum.7	91377efe00058f5dce5e9466b00805f6
1	Bacteria	Firmicutes	Clostridia	Lachnospirales	Lachnospiraceae	Lachnoanaerobaculum	Lachnoanaerobaculum	57b315f963039a82671fa643971d1431
1	Bacteria	Proteobacteria	Gammaproteobacteria	Enterobacterales	Enterobacteriaceae	Pantoea	Pantoea allii/ananatis/anthophila/calida/conspicua/deleyi/dispersa/dispersa_B/eucrina/gaviniae/persica/sp003813865/sp009830035/stewartii/wallisii	92c9ee3ede3e3abe1f13af7aed09ca87
1	Bacteria	Fusobacteriota	Fusobacteriia	Fusobacteriales	Fusobacteriaceae	Fusobacterium	Fusobacterium animalis	e47b7c57183d489a185e684d3dc8f4e6
1	Bacteria	Firmicutes	Clostridia	Lachnospirales	Lachnospiraceae	[Ruminococcus] gnavus group	[Ruminococcus] gnavus group.5	1d2025c2df7522c251e7a0d65c9ebd35
1	Bacteria	Bacteroidota	Bacteroidia	Bacteroidales	Tannerellaceae	Parabacteroides	Parabacteroides sp.31.4	70236784520fea30941d17d96d48f58a
2	Bacteria	Firmicutes	Bacilli	Lactobacillales	Enterococcaceae	Enterococcus_A	Enterococcus_A avium/florum/gilvus/hermanniensis/malodoratus/pallens/pseudoavium/raffinosus/sp005405205/viikkiensis/xiangfangensis.4	c1f2f989c915f7899531d82f0ea94b79
1	Bacteria	Bacteroidota	Bacteroidia	Bacteroidales	Bacteroidaceae	Bacteroides	fragilis.4	249d69c5355740351f069bd070998f9c
1	Bacteria	Firmicutes	Clostridia	Peptostreptococcales-Tissierellales	Family XI	Anaerococcus	prevotii	4cdf36c21adce2ca6150ad40f3a0fb7d
1	Bacteria	Firmicutes	Clostridia	Clostridiales	Clostridiaceae	Clostridium sensu stricto 1	Clostridium sensu stricto 1.4	6aee73dafee612f6712c469d7d9474f0
1	Bacteria	Firmicutes_A	Clostridia	Lachnospirales	Lachnospiraceae	Mediterraneibacter	Mediterraneibacter sp.2.2	68a7d7fa9f5c69e2b6710e1a569a911e
1	Bacteria	Firmicutes	Bacilli	Lactobacillales	Enterococcaceae	Family_Enterococcaceae	Family_Enterococcaceae.11	eee76d3ad204b960fe1fd7274730ec2c
1	Bacteria	Actinobacteriota	Actinobacteria	Bifidobacteriales	Bifidobacteriaceae	Bifidobacterium	catenulatum.3	146e9836a0a850c734c741c185bd1645
1	Bacteria	Proteobacteria	Gammaproteobacteria	Enterobacterales	Pasteurellaceae	Haemophilus	parainfluenzae.2	2903f2e41955a0f7fe924306eadea605
4	Bacteria	Firmicutes	Clostridia	Oscillospirales	Oscillospiraceae	NK4A214 group	NK4A214 group.1	d4b9487f80a46f105daa14816456c5f6
1	Bacteria	Firmicutes	Clostridia	Oscillospirales	Ruminococcaceae	Incertae Sedis	Incertae Sedis.2	84d5b4caf97aa015e10e7cc6e8784be7
1	Bacteria	Firmicutes_A	Clostridia	Clostridiales	Clostridiaceae	Clostridium_P	Clostridium_P perfringens.1	417d37f6e6535466a0d87c56890b10b8
4	Bacteria	Firmicutes_A	Clostridia_A	Christensenellales	CAG-74	OEMS01	OEMS01 sp.	da7125b25a294757ee6c5e4909a181c1
1	Bacteria	Firmicutes	Clostridia	Lachnospirales	Lachnospiraceae	[Ruminococcus] gnavus group	[Ruminococcus] gnavus group.6	262bc4a2309c5d57c5ccc369ce76310e
2	Bacteria	Firmicutes	Clostridia	Peptostreptococcales-Tissierellales	Peptostreptococcaceae	Peptostreptococcus	Peptostreptococcus	f148c9872201cbd90a403cf63b13e46c
4	Bacteria	Firmicutes_A	Clostridia	Oscillospirales	Oscillospiraceae	CAG-83	CAG-83 sp.4	60bed339f40d58c6de65c2b894d2132e
4	Bacteria	Firmicutes_A	Clostridia	Lachnospirales	Lachnospiraceae	CAG-81	CAG-81 sp900066785	fb6956ecda12a8dc652b1866dea12301
1	Bacteria	Firmicutes	Bacilli	Lactobacillales	Enterococcaceae	Family_Enterococcaceae	Family_Enterococcaceae.12	41aebc40147cb1e9583790f0986af3e7
1	Bacteria	Firmicutes_A	Clostridia	Lachnospirales	Anaerotignaceae	Anaerotignum	Anaerotignum lactatifermentans/sp001304995	82b97d3e4042196df9c0257bf665fa64
1	Bacteria	Firmicutes	Clostridia	Lachnospirales	Lachnospiraceae	Blautia	obeum.2	c8d43c85eb5dcbf80ea981bd247d7df3
1	Bacteria	Proteobacteria	Gammaproteobacteria	Enterobacterales	Enterobacteriaceae	Serratia	Serratia marcescens/marcescens_B/marcescens_F/marcescens_I/marcescens_J/marcescens_K/nematodiphila/surfactantfaciens/ureilytica.1	89d438635081c9120c3510b26ab013de
4	Bacteria	Firmicutes_A	Clostridia	Lachnospirales	Lachnospiraceae	Schaedlerella	Schaedlerella sp.2	b3b6e3bbe6d419a333530ce6c029ebc1
1	Bacteria	Proteobacteria	Gammaproteobacteria	Enterobacterales	Enterobacteriaceae	Klebsiella	quasipneumoniae.3	7af90b1e8cbdf0350b7da534a8777b5e
1	Bacteria	Firmicutes	Negativicutes	Veillonellales-Selenomonadales	Veillonellaceae	Veillonella	Veillonella.5	06ac319503697277407bb65368fe9efa
1	Bacteria	Firmicutes	Clostridia	Eubacteriales	Eubacteriaceae	Eubacterium	limosum.1	ee3f85812ea12501fb3cfbad9d4b58f0
1	Bacteria	Firmicutes_A	Clostridia	Lachnospirales	Lachnospiraceae	Faecalimonas	Faecalimonas umbilicata.4	c4918f5da506699a58039bdbdfc6cfc5
2	Bacteria	Actinobacteriota	Actinobacteria	Micrococcales	Micrococcaceae	Rothia	mucilaginosa.1	8fef8928834112f3755db7e82d3e1047
1	Bacteria	Firmicutes_A	Clostridia	Lachnospirales	Lachnospiraceae	Dorea	Dorea formicigenerans.1	251a42d30c1737e08fc5296550d3575b
1	Bacteria	Firmicutes	Bacilli	Lactobacillales	Lactobacillaceae	Lactobacillus	gasseri.4	7807690536e23f1284824f5109edd373
1	Bacteria	Bacteroidota	Bacteroidia	Bacteroidales	Bacteroidaceae	Bacteroides	fragilis.5	4e0a4dca8683309fa0e1fd1f29e905bd
4	Bacteria	Firmicutes_A	Clostridia	Lachnospirales	Lachnospiraceae	Eisenbergiella	Eisenbergiella sp.2	be1fe9bfe424ad27f568d8e2d7b42c19
2	Bacteria	Firmicutes	Bacilli	Lactobacillales	Streptococcaceae	Streptococcus	salivarius.15	869b2f58b9b99e6cd8abdf91156321eb
1	Bacteria	Proteobacteria	Gammaproteobacteria	Enterobacterales	Enterobacteriaceae	Klebsiella	variicola.2	c27ad79848adcd406bf90804cb13ec9b
1	Bacteria	Bacteroidota	Bacteroidia	Bacteroidales	Prevotellaceae	Prevotella_9	Prevotella_9.2	4db1fea078c898d625f5c35efb71fa65
4	Bacteria	Proteobacteria	Gammaproteobacteria	Pseudomonadales	Pseudomonadaceae	Pseudomonas	azotoformans	e01ccd749960b04699eef783119e25ae
1	Bacteria	Firmicutes	Negativicutes	Veillonellales-Selenomonadales	Veillonellaceae	Veillonella	Veillonella.6	52c9498a33730d91e3614567d3d3b1a0
4	Bacteria	Bacteroidota	Bacteroidia	Bacteroidales	Bacteroidaceae	Bacteroides	faecis.1	7ce20dc0d050d5b02daef50d77765562
1	Bacteria	Proteobacteria	Gammaproteobacteria	Enterobacterales	Enterobacteriaceae	Raoultella	planticola.2	d397e93c34ef71fdddc138f8f6016f76
4	Bacteria	Firmicutes	Clostridia	Lachnospirales	Lachnospiraceae	Lachnoclostridium	Lachnoclostridium.8	52ff61ba04c094dd910d6954ec9ae8dd
1	Bacteria	Firmicutes	Clostridia	Oscillospirales	Ruminococcaceae	Faecalibacterium	Faecalibacterium.4	7ed972b3ff6e0588011be4de21143173
1	Bacteria	Firmicutes	Clostridia	Lachnospirales	Lachnospiraceae	Fusicatenibacter	Fusicatenibacter.3	77920f84499e8f4b9ba379d6a3b37a17
1	Bacteria	Firmicutes	Bacilli	Lactobacillales	Lactobacillaceae	Limosilactobacillus	Limosilactobacillus mucosae.3	d417dc15280cefc93ecb66ccf4a4c863
1	Bacteria	Firmicutes	Clostridia	Oscillospirales	Ruminococcaceae	Subdoligranulum	Subdoligranulum.2	65cd8c2f7f6a9c594a246e58c51a4a55
1	Bacteria	Proteobacteria	Gammaproteobacteria	Burkholderiales	Burkholderiaceae	Sutterella	Sutterella wadsworthensis.1	222e21f6500d5e0aa66f371387a91193
4	Bacteria	Bacteroidota	Bacteroidia	Bacteroidales	Bacteroidaceae	Bacteroides	ovatus.6	51f7c8ee44363f94d016d6907b20aced
1	Bacteria	Proteobacteria	Gammaproteobacteria	Enterobacterales	Enterobacteriaceae	Klebsiella	michiganensis	e6f81bec41d53011955c374089a659c2
1	Bacteria	Firmicutes	Bacilli	Lactobacillales	Streptococcaceae	Streptococcus	salivarius.16	2640b553d81a722e11035829535abef8
2	Bacteria	Firmicutes_A	Clostridia	Lachnospirales	Lachnospiraceae	Enterocloster	Enterocloster aldenensis.1	d4848cd203e995d5512b8fb8dd42c04c
4	Bacteria	Bacteroidota	Bacteroidia	Bacteroidales	Bacteroidaceae	Bacteroides	caccae.1	572be56789b840dc21f0dfad380396b3
1	Bacteria	Proteobacteria	Gammaproteobacteria	Enterobacterales	Enterobacteriaceae	Enterobacter	Enterobacter.2	20d7361ee8e75641d726de9978d7fa26
2	Bacteria	Bacteroidota	Bacteroidia	Bacteroidales	Prevotellaceae	Prevotella_9	Prevotella_9.3	eb4c910863320282fd9d8c743730532a
2	Bacteria	Firmicutes	Clostridia	Lachnospirales	Lachnospiraceae	Lachnospiraceae NK4A136 group	Lachnospiraceae NK4A136 group.4	2b4b5424bc22bdd6fe6cc7c55e915bd8
1	Bacteria	Firmicutes_A	Clostridia	Clostridiales	Clostridiaceae	Clostridium_P	Clostridium_P perfringens.2	64b03197ff7bd5f18b7b84eb92801e65
1	Bacteria	Firmicutes	Clostridia	Oscillospirales	Ruminococcaceae	Faecalibacterium	prausnitzii.8	653166cec5eae50be1617db347340fe8
2	Bacteria	Firmicutes	Bacilli	Lactobacillales	Streptococcaceae	Streptococcus	salivarius.17	3e06f54b73e140ffa300b1d402c7ceec
1	Bacteria	Firmicutes_A	Clostridia	Class_Clostridia	Class_Clostridia	Class_Clostridia	Class_Clostridia3	311fcd46fd720fc7495e3e6c970cdf3d
1	Bacteria	Bacteroidota	Bacteroidia	Bacteroidales	Tannerellaceae	Parabacteroides	Parabacteroides distasonis	67a2a733f2d4b78ea8405714faab1d32
1	Bacteria	Bacteroidota	Bacteroidia	Bacteroidales	Prevotellaceae	Paraprevotella	Paraprevotella	3d48874183df65f00f253cf68234e2ca
1	Bacteria	Proteobacteria	Gammaproteobacteria	Enterobacterales	Enterobacteriaceae	Klebsiella	quasipneumoniae.4	ddbf8c73acb1b0f656f5a6e55d1f83d8
4	Bacteria	Desulfobacterota	Desulfovibrionia	Desulfovibrionales	Desulfovibrionaceae	Desulfovibrio	Desulfovibrio fairfieldensis/sp900540515	b16c17d0d223b2b703fc8c25e569b1ed
1	Bacteria	Firmicutes	Bacilli	Lactobacillales	Lactobacillaceae	Lactobacillus	iners	c1b13a6ceb36e548df8a32430965974f
1	Bacteria	Bacteroidota	Bacteroidia	Bacteroidales	Rikenellaceae	Tidjanibacter	Tidjanibacter inops_A.1	60f2dbd465b2d1d27cee31b719738378
1	Bacteria	Firmicutes_A	Clostridia	TANB77	CAG-508	Family_CAG-508	Family_CAG-5082	eee14085710b17eacbb0153b1ec1d909
1	Bacteria	Actinobacteriota	Actinobacteria	Bifidobacteriales	Bifidobacteriaceae	Bifidobacterium	longum.8	fb0b3f0fd556ef82d0a75b110924a3b8
4	Bacteria	Firmicutes	Clostridia	Lachnospirales	Lachnospiraceae	[Eubacterium] hallii group	hallii.2	3534b4be198dac95882f6e730b647c60
1	Bacteria	Actinobacteriota	Actinobacteria	Propionibacteriales	Propionibacteriaceae	Cutibacterium	acnes	b02a8d33d018119dedb2db15db887bfd
1	Bacteria	Firmicutes_A	Clostridia	Oscillospirales	Acutalibacteraceae	CAG-488	CAG-488 sp.	eac1ec3854a2cea1ed494097a8f1e33a
1	Bacteria	Firmicutes	Clostridia	Clostridiales	Clostridiaceae	Clostridium sensu stricto 1	Clostridium sensu stricto 1.5	46ca1e88820278153d2808a033bf1054
4	Bacteria	Firmicutes_A	Clostridia	Lachnospirales	Lachnospiraceae	UBA9502	UBA9502 sp003478505/sp003480315/sp003481825/sp003506385	777dafa3e5bad680cc5a2c1418e8b728
1	Bacteria	Firmicutes_A	Clostridia	Lachnospirales	Lachnospiraceae	Lachnospira	Lachnospira sp.	0765c0c663336463b3b6bdec60c49c7f
4	Bacteria	Firmicutes_A	Clostridia	Lachnospirales	Lachnospiraceae	Blautia_A	Blautia_A massiliensis/schinkii/sp003474435/sp900066205/sp900066335.2	5efe9c4123ddb4fd8e8b4da7886b0a2f
1	Bacteria	Firmicutes	Bacilli	Lactobacillales	Streptococcaceae	Streptococcus	oralis.1	101637aba474a6614786486ad42acb11
1	Bacteria	Firmicutes	Bacilli	Erysipelotrichales	Erysipelotrichaceae	Clostridium_AQ	Clostridium_AQ innocuum/sp900755895.1	710a1e719731916353e5f7d4cc5c13a9
2	Bacteria	Firmicutes	Bacilli	Lactobacillales	Streptococcaceae	Streptococcus	salivarius.18	ea3bb08d5de73d8a975fdfb37f15f32e
1	Bacteria	Firmicutes	Negativicutes	Veillonellales-Selenomonadales	Veillonellaceae	Veillonella	Veillonella.7	1962f53019c652136a281e44753831e9
1	Bacteria	Firmicutes	Clostridia	Lachnospirales	Lachnospiraceae	Blautia	obeum.3	1bde84fb415a7b4f255f46af59f365f7
4	Bacteria	Firmicutes_A	Clostridia_A	Christensenellales	CAG-74	UBA11524	UBA11524 sp.	d5f5b3a613f4055f47c471c944bab792
1	Bacteria	Firmicutes_A	Clostridia	Lachnospirales	Lachnospiraceae	Mediterraneibacter	Mediterraneibacter lactaris.1	80e68886d9b10549f8c0efbbfcd7505c
1	Bacteria	Firmicutes_C	Negativicutes	Veillonellales	Dialisteraceae	Dialister	Dialister sp.17	0f8974dae96fe754fea7740c379aacb8
4	Bacteria	Firmicutes_A	Clostridia	Oscillospirales	Butyricicoccaceae	Agathobaculum	Agathobaculum butyriciproducens	e6f9cdf88e8366c018076ab8edbdd223
1	Bacteria	Firmicutes	Bacilli	Erysipelotrichales	Erysipelotrichaceae	Clostridium_AQ	Clostridium_AQ innocuum/sp900755895.2	0bb1e6920e74dd7b1e709ad678b58eee
1	Bacteria	Actinobacteriota	Coriobacteriia	Coriobacteriales	Atopobiaceae	Coriobacteriaceae UCG-003	Coriobacteriaceae UCG-003	813e2f4a016196c8e18a7fb6152332a4
2	Bacteria	Firmicutes	Bacilli	Lactobacillales	Enterococcaceae	Enterococcus_A	Enterococcus_A avium/florum/gilvus/hermanniensis/malodoratus/pallens/pseudoavium/raffinosus/sp005405205/viikkiensis/xiangfangensis.5	8616ccf21fa06181d636dac74fdb34b9
1	Bacteria	Proteobacteria	Gammaproteobacteria	Enterobacterales	Enterobacteriaceae	Klebsiella	quasipneumoniae.5	91a0c75a40fa2677f474afbca68399e9
1	Bacteria	Proteobacteria	Gammaproteobacteria	Burkholderiales	Oxalobacteraceae	Massilia	Massilia.1	b101c0837578cd631878defef6a88e50
1	Bacteria	Firmicutes	Bacilli	Lactobacillales	Streptococcaceae	Streptococcus	anginosus.2	acc8638b748fda9431e29d92e5a6506c
2	Bacteria	Firmicutes_C	Negativicutes	Veillonellales	Dialisteraceae	Dialister	Dialister sp.4.1	39cdf1ff28fa95478d410c2f14315d2c
1	Bacteria	Firmicutes	Clostridia	Lachnospirales	Lachnospiraceae	Fusicatenibacter	Fusicatenibacter.4	d11889e0f647f4912b377f1e8a7b7542
1	Bacteria	Proteobacteria	Gammaproteobacteria	Enterobacterales	Enterobacteriaceae	Yersinia	Yersinia aldovae/aleksiciae/aquatilis/aquatilis_B/bercovieri/enterocolitica/enterocolitica_E/enterocolitica_F/enterocolitica_H/frederiksenii/frederiksenii_C/grimesii/hibernica/intermedia/kristensenii/kristensenii_B/kristensenii_C/liquefaciens/massiliensis/mollaretii/pekkanenii/pestis/plymuthica/plymuthica_A/proteamaculans_D/quinivorans/rohdei/similis/sp000743355.1	e8165c825d679874a9c71c16408fbbfd
1	Bacteria	Firmicutes_A	Clostridia	Lachnospirales	Lachnospiraceae	Clostridium_Q	Clostridium_Q symbiosum.1	823a2322c3ffcf043ade7b6242331031
1	Bacteria	Proteobacteria	Gammaproteobacteria	Enterobacterales	Enterobacteriaceae	Enterobacter	roggenkampii	2ddcd7316b3e6cd6fa4e85ea4e0fe231
4	Bacteria	Firmicutes_A	Clostridia	Oscillospirales	Ruminococcaceae	CAG-115	CAG-115 sp.2	9cda306bfa89b41598d23c5f3b44784b
1	Bacteria	Firmicutes	Bacilli	Staphylococcales	Staphylococcaceae	Staphylococcus	Staphylococcus.11	62611dedc42201591d0c89973f903dde
1	Bacteria	Actinobacteriota	Actinomycetia	Actinomycetales	Actinomycetaceae	Actinomyces	Actinomyces bowdenii_A/bowdenii_B/sp013185035	5b6cfd1fca3d946f920e850de4b691c1
2	Bacteria	Firmicutes	Clostridia	Lachnospirales	Lachnospiraceae	Blautia	Blautia.14	8d86ca2f2e17e82e2f5e94f580e02019
2	Bacteria	Firmicutes	Bacilli	Lactobacillales	Aerococcaceae	Granulicatella	Granulicatella adiacens/sp001058355/sp001071995	a5b69f125c8e15c8b470bd65ffa241c1
1	Bacteria	Bacteroidota	Bacteroidia	Bacteroidales	Bacteroidaceae	Bacteroides	caccae.2	bf0c95cbf2aba48ccdea3b6eee9432b3
1	Bacteria	Actinobacteriota	Actinobacteria	Corynebacteriales	Corynebacteriaceae	Corynebacterium	simulans	2005a1e1770a6a8a846c0003bf97b97f
1	Bacteria	Firmicutes	Bacilli	Lactobacillales	Lactobacillaceae	HT002	HT002.1	5e1449e682a95e06447ed6098632c55c
4	Bacteria	Firmicutes_A	Clostridia	Oscillospirales	Oscillospiraceae	ER4	ER4 sp.2	9cdb9dbe98d86651359273ea1c595c84
1	Bacteria	Firmicutes	Bacilli	Lactobacillales	Enterococcaceae	Family_Enterococcaceae	Family_Enterococcaceae.13	f13cfd26083a17ca9a47f3c4760fc819
4	Bacteria	Firmicutes_A	Clostridia	Clostridiales	Clostridiaceae	Clostridium	Clostridium sp001916075	b4ed8ec9d3313b1ae0b929812511444b
1	Bacteria	Proteobacteria	Gammaproteobacteria	Burkholderiales	Burkholderiaceae	Ralstonia	pickettii	6c85a781bf0fdb3b415403ee67b88633
1	Bacteria	Firmicutes	Bacilli	Lactobacillales	Streptococcaceae	Streptococcus	lutetiensis.2	bd6603784662578e38a36aca1bbaa5c1
1	Bacteria	Proteobacteria	Alphaproteobacteria	Caulobacterales	Caulobacteraceae	Brevundimonas	diminuta	71fd06bf8c25e42ed875df9c9ed704f7
1	Bacteria	Proteobacteria	Gammaproteobacteria	Enterobacterales	Enterobacteriaceae	Klebsiella	variicola.3	9e047940220286e815642d27dea3f0a3
1	Bacteria	Firmicutes_A	Clostridia	Lachnospirales	Lachnospiraceae	Faecalimonas	Faecalimonas umbilicata.5	e5a4822a37c52c1cbf7d232e81c280f5
1	Bacteria	Firmicutes	Clostridia	Lachnospirales	Lachnospiraceae	[Eubacterium] fissicatena group	[Eubacterium] fissicatena group	606a376eebbbd07e8cc0240eed23e4ba
1	Bacteria	Firmicutes_A	Clostridia	Clostridiales	Clostridiaceae	Clostridium	Clostridium cuniculi/saudiense.2	37ae25468d939fb794884a3f579c8e29
1	Bacteria	Firmicutes	Clostridia	Lachnospirales	Lachnospiraceae	[Ruminococcus] gnavus group	[Ruminococcus] gnavus group.7	d8373e432d4b268efb5d4a735b6ef832
4	Bacteria	Firmicutes_A	Clostridia	Peptostreptococcales	Anaerovoracaceae	UBA1191	UBA1191 sp900549125	b2e3ca61649c535cfcaffb8b105727bf
2	Bacteria	Actinobacteriota	Actinobacteria	Bifidobacteriales	Bifidobacteriaceae	Bifidobacterium	longum.9	41388070b02a7c162aa7245ce4812ebd
1	Bacteria	Firmicutes	Bacilli	Lactobacillales	Lactobacillaceae	Limosilactobacillus	Limosilactobacillus fermentum.4	f9c348b9aa03249b74398d7f5c647c54
1	Bacteria	Proteobacteria	Alphaproteobacteria	Rhodobacterales	Rhodobacteraceae	Marivivens	Marivivens	2c289264f0dbbd7cff630d5f42725412
1	Bacteria	Bacteroidota	Bacteroidia	Bacteroidales	Bacteroidaceae	Bacteroides	Bacteroides stercoris.1	d8f2dc4eaea2185643dd28857f8b8c38
4	Bacteria	Firmicutes_A	Clostridia	Lachnospirales	Lachnospiraceae	UBA3402	UBA3402 sp.	3a2e84529949060743db3e340cfee803
4	Bacteria	Firmicutes	Clostridia	Lachnospirales	Lachnospiraceae	Lachnospiraceae	Lachnospiraceae.4	42fb6291f38217a664f36373ff99c48e
1	Bacteria	Firmicutes	Clostridia	Lachnospirales	Lachnospiraceae	Sellimonas	Sellimonas.2	a8a903c01a0e8745a52905a2759f28b5
1	Bacteria	Actinobacteriota	Actinobacteria	Corynebacteriales	Corynebacteriaceae	Corynebacterium	kroppenstedtii	a312f04740f610b24d3e3291278905f2
1	Bacteria	Firmicutes	Negativicutes	Veillonellales-Selenomonadales	Veillonellaceae	Veillonella	ratti.7	77aabab6d436ddfb67f49ce7f7659935
4	Bacteria	Firmicutes	Clostridia	Lachnospirales	Lachnospiraceae	Blautia	Blautia.15	bf0c3b22c58a911e772d029abbb090c7
2	Bacteria	Firmicutes	Clostridia	Lachnospirales	Lachnospiraceae	Anaerostipes	hadrus.7	aadb8ad565bef57fe3836ad821153c41
4	Bacteria	Firmicutes_A	Clostridia	Lachnospirales	Lachnospiraceae	UMGS1375	UMGS1375 sp900066615.1	a00b4fdac316fe32b233507d015a5712
1	Bacteria	Bacteroidota	Bacteroidia	Bacteroidales	Prevotellaceae	Prevotella_7	buccae	1a00ce3e5063973b359dfa3f3a31629a
2	Bacteria	Firmicutes	Clostridia	Lachnospirales	Lachnospiraceae	[Ruminococcus] gnavus group	[Ruminococcus] gnavus group.8	c329a26345b8aab71c1405ea6048da7c
4	Bacteria	Firmicutes	Clostridia	Christensenellales	Christensenellaceae	Christensenellaceae R-7 group	Christensenellaceae R-7 group.4	0fe68e214920b4453dd8f1eff9705fd0
1	Bacteria	Firmicutes	Clostridia	Lachnospirales	Lachnospiraceae	[Ruminococcus] gnavus group	[Ruminococcus] gnavus group.9	77487d29d1d4e6120ff3aa18ec4c1229
1	Bacteria	Firmicutes	Clostridia	Oscillospirales	Butyricicoccaceae	Butyricicoccus	Butyricicoccus.1	b7d0094f6b226b5983910757b67f589d
1	Bacteria	Proteobacteria	Gammaproteobacteria	Enterobacterales	Enterobacteriaceae	Citrobacter	Citrobacter	4d4d9fd660f35eae2082c5f0f2aa32f3
4	Bacteria	Firmicutes_A	Clostridia	Oscillospirales	Acutalibacteraceae	Family_Acutalibacteraceae	Family_Acutalibacteraceae6	01a270b0733965114b2a6366fb83f2d9
2	Bacteria	Firmicutes	Bacilli	Lactobacillales	Streptococcaceae	Streptococcus	Streptococcus.5	0d5d2c559a0eda75b41048b270a0d8d9
1	Bacteria	Firmicutes	Bacilli	Lactobacillales	Lactobacillaceae	Lacticaseibacillus	Lacticaseibacillus casei/chiayiensis/paracasei/zeae.1	5e363f9560024a78c8913378b69f6d22
1	Bacteria	Bacteroidota	Bacteroidia	Bacteroidales	Prevotellaceae	Prevotella_9	Prevotella_9.4	c6da490b249d5d89af322503daac81d9
1	Bacteria	Firmicutes	Clostridia	Lachnospirales	Lachnospiraceae	Agathobacter	Agathobacter.6	7a81ed73277ab9880a60ea82d3f25c3c
4	Bacteria	Firmicutes_A	Clostridia	Lachnospirales	Lachnospiraceae	Blautia_A	Blautia_A sp.7	7264589ddb2564833538529c953df6bc
1	Bacteria	Bacteroidota	Bacteroidia	Bacteroidales	Bacteroidaceae	Bacteroides	dorei.5	2ff23914788d05c5e3082c4353b3a97b
4	Bacteria	Firmicutes	Bacilli	Bacillales	Bacillaceae_G	Bacillus_A	Bacillus_A albus/bingmayongensis/bombysepticus/cereus/cereus_AG/cereus_AK/cereus_AQ/cereus_AT/cereus_AU/cereus_AV/cereus_AW/cereus_AZ/cereus_K/cereus_O/cereus_S/defluvii/fungorum/gaemokensis/lactosutens_A/luti/microflavus/mobilis/mycoides/mycoides_A/mycoides_B/mycoides_C/nitratireducens/paramycoides/paranthracis/proteolyticus/pseudomycoides/pseudomycoides_C/quinghaiensis/sp001683825/sp002551815/s…	8cb24777cb48dde0aac60dfeca125d10
1	Bacteria	Bacteroidota	Bacteroidia	Bacteroidales	Tannerellaceae	Parabacteroides	Parabacteroides sp.31.5	0519ed95e3ceabb6677c7574de9f1a58
1	Bacteria	Actinobacteriota	Actinobacteria	Actinomycetales	Actinomycetaceae	Actinomyces	Actinomyces.1	51a6285eda821d0081935019356d3fee
1	Bacteria	Firmicutes_A	Clostridia	Lachnospirales	Lachnospiraceae	Mediterraneibacter	Mediterraneibacter sp.2.3	484e4a01494e974199efe7338fda2f0e
1	Bacteria	Firmicutes	Bacilli	Staphylococcales	Staphylococcaceae	Staphylococcus	Staphylococcus.12	c198c4ce3679e38968037146f9195f31
1	Bacteria	Proteobacteria	Gammaproteobacteria	Enterobacterales	Enterobacteriaceae	Klebsiella	Klebsiella.3	ea8d6f88f1cf296ba9ba585d70352656
1	Bacteria	Firmicutes_A	Clostridia	Oscillospirales	Ruminococcaceae	Gemmiger	Gemmiger sp900540595.1	500cca9a03000e3a8894d3c890f83439
2	Bacteria	Actinobacteriota	Actinobacteria	Bifidobacteriales	Bifidobacteriaceae	Bifidobacterium	longum.10	bd85e66a665a9d3e7091815ef5885a8e
4	Bacteria	Bacteroidota	Bacteroidia	Bacteroidales	Bacteroidaceae	Bacteroides	ovatus.7	155ace0850fc88498e3c881bc5252fcc
1	Bacteria	Firmicutes	Clostridia	Lachnospirales	Lachnospiraceae	Dorea	Dorea.3	a3e1092e4a1f9f6b9386500187339d0b
4	Bacteria	Firmicutes_A	Clostridia	Lachnospirales	Lachnospiraceae	Coprococcus	Coprococcus eutactus_A	9cb986fb9a5d33f51977148b33c14fcb
1	Bacteria	Actinobacteriota	Actinobacteria	Bifidobacteriales	Bifidobacteriaceae	Bifidobacterium	breve.6	a25bf38f979f7e02cbfdb0b65c3b6b66
1	Bacteria	Firmicutes	Negativicutes	Veillonellales-Selenomonadales	Veillonellaceae	Veillonella	atypica.7	825f6348a5a5349d014debfb1ca5762a
1	Bacteria	Bacteroidota	Bacteroidia	Bacteroidales	Bacteroidaceae	Bacteroides	ovatus.8	c7a4ecfad9a76993c997e809e990e932
1	Bacteria	Actinobacteriota	Actinomycetia	Actinomycetales	Micrococcaceae	Rothia	Rothia sp.2	78ad607ed9e17d60a51de19b9b7441b7
1	Bacteria	Firmicutes	Clostridia	Peptostreptococcales-Tissierellales	Family XI	Anaerococcus	vaginalis.5	24f7da58f688ba40cfcd1f36addc2bba
2	Bacteria	Firmicutes	Bacilli	Lactobacillales	Enterococcaceae	Enterococcus_A	Enterococcus_A avium/florum/gilvus/hermanniensis/malodoratus/pallens/pseudoavium/raffinosus/sp005405205/viikkiensis/xiangfangensis.6	7e741518b531de7275c37c34f3f1cf5e
1	Bacteria	Actinobacteriota	Actinomycetia	Actinomycetales	Actinomycetaceae	Pauljensenia	Pauljensenia odontolytica/odontolytica_A/odontolytica_B/odontolytica_C/sp000185285/sp000411415/sp000466265/sp001064145/sp001072465/sp001838165.3	8089044c665c34279158d8ccc3b48e6e
1	Bacteria	Firmicutes_A	Clostridia	Oscillospirales	Ruminococcaceae	Gemmiger	Gemmiger sp.5	d72a143eea065cf571e032a5b714bb9f
1	Bacteria	Actinobacteriota	Coriobacteriia	Coriobacteriales	Eggerthellaceae	Senegalimassilia	Senegalimassilia sp..1	49f0dedfb1d98ce1c99d881fc8efab96
1	Bacteria	Firmicutes	Negativicutes	Veillonellales-Selenomonadales	Veillonellaceae	Veillonella	parvula.9	56fa36c31869b511f51741d7057b41e6
1	Bacteria	Firmicutes	Clostridia	Clostridiales	Clostridiaceae	Clostridium sensu stricto 1	Clostridium sensu stricto 1.6	55d9aa1d7c511d7612c78a0f37b2bd91
1	Bacteria	Firmicutes	Clostridia	Lachnospirales	Lachnospiraceae	[Eubacterium] xylanophilum group	[Eubacterium] xylanophilum group	fe033ae5b9559770d1b4b40cfc3f41c0
1	Bacteria	Verrucomicrobiota	Verrucomicrobiae	Verrucomicrobiales	Akkermansiaceae	Akkermansia	Akkermansia.2	f20bb92ab6a077504c3d310b9706765b
1	Bacteria	Proteobacteria	Gammaproteobacteria	Enterobacterales	Enterobacteriaceae	Escherichia-Shigella	coli.7	88c181cecf6d227d4f8d180cf441ad01
1	Bacteria	Firmicutes	Bacilli	Lactobacillales	Streptococcaceae	Streptococcus	lutetiensis.3	e7d90036febcd048ee88fa9ee73ddebc
4	Bacteria	Firmicutes_A	Clostridia	Oscillospirales	Ruminococcaceae	Ruminiclostridium_E	Ruminiclostridium_E sp.	ac60fa197b1c1cf62677ee9434c86b18
1	Bacteria	Firmicutes	Bacilli	Lactobacillales	Enterococcaceae	Family_Enterococcaceae	Family_Enterococcaceae.14	7c9b9f921a257ece7f4655e48069cfdd
2	Bacteria	Firmicutes_A	Clostridia	Lachnospirales	Lachnospiraceae	Anaerostipes	Anaerostipes caccae/sp000508985.2	5859efabe044b513d29a3e998263800d
1	Bacteria	Firmicutes	Negativicutes	Veillonellales-Selenomonadales	Veillonellaceae	Veillonella	atypica.8	e28e92ba28bd753426fd41e5fe94b0c5
4	Bacteria	Firmicutes_A	Clostridia_A	Christensenellales	CAG-138	Phil1	Phil1 sp.2	7fd6a8fd06f07f444172e3789e19d84a
1	Bacteria	Firmicutes_A	Clostridia	Lachnospirales	Lachnospiraceae	Eubacterium_G	Eubacterium_G sp000432355/ventriosum	ccab1783362aa15ea78fcdd98f8a41c6
2	Bacteria	Actinobacteriota	Actinobacteria	Bifidobacteriales	Bifidobacteriaceae	Bifidobacterium	breve.7	659a8b27ae8b4ebbf501701f7ec608dc
2	Bacteria	Firmicutes	Bacilli	Erysipelotrichales	Erysipelatoclostridiaceae	Erysipelatoclostridium	ramosum.2	4c998477d545d3302277ec724ba2c583
4	Bacteria	Bacteroidota	Bacteroidia	Bacteroidales	Barnesiellaceae	Barnesiella	Barnesiella sp.6	53f976e60f93b527ffa62fbe48254d53
2	Bacteria	Bacteroidota	Bacteroidia	Bacteroidales	Rikenellaceae	Alistipes	putredinis	ca60f9527111263bca48622331f2b3f6
1	Bacteria	Firmicutes	Clostridia	Lachnospirales	Lachnospiraceae	Fusicatenibacter	Fusicatenibacter.5	13f884e90f528162941e93ba9befe79d
1	Bacteria	Firmicutes	Clostridia	Oscillospirales	Ruminococcaceae	Ruminococcus	Ruminococcus	d290f23a30825ebe5e4db36df3801666
1	Bacteria	Bacteroidota	Bacteroidia	Bacteroidales	Prevotellaceae	Prevotella_9	Prevotella_9.5	719852b30b6cf6748f52cf99407e1e35
4	Bacteria	Bacteroidota	Bacteroidia	Bacteroidales	Bacteroidaceae	Bacteroides	vulgatus.7	6251bd9ebf43fae466939ab366f6e547
1	Bacteria	Firmicutes	Clostridia	Oscillospirales	Ruminococcaceae	Faecalibacterium	prausnitzii.9	745ab93e968243c04e47b6dd6ca25f7d
1	Bacteria	Firmicutes	Clostridia	Lachnospirales	Lachnospiraceae	Blautia	obeum.4	72153962b09a58b084c09a8def9f75bc
1	Bacteria	Bacteroidota	Bacteroidia	Bacteroidales	Prevotellaceae	Prevotella_9	Prevotella_9.6	927948a3ccf40d7671afc0d5334d3eb6
1	Bacteria	Bacteroidota	Bacteroidia	Bacteroidales	Prevotellaceae	Prevotella	corporis	608ebe0051f9a43473d71082ad13908a
1	Bacteria	Firmicutes	Bacilli	Staphylococcales	Staphylococcaceae	Staphylococcus	lugdunensis.1	b89e5ec05f076f9b7934ce741a3f14ca
4	Bacteria	Actinobacteriota	Coriobacteriia	Coriobacteriales	Eggerthellaceae	Gordonibacter	Gordonibacter pamelaeae	89f40e8549c8ce6a0e9b08036572f9f3
1	Bacteria	Firmicutes	Clostridia	Lachnospirales	Lachnospiraceae	Lachnospira	Lachnospira	94300cdc6d2a3e76446223e3948231af
2	Bacteria	Firmicutes_A	Clostridia	Oscillospirales	Oscillospiraceae	Flavonifractor	Flavonifractor plautii/sp000508885.2	9be8e4d4919ec569eb355cb676c02eef
1	Bacteria	Firmicutes_A	Clostridia	Clostridiales	Clostridiaceae	Clostridium	Clostridium sartagoforme_A/tertium.1	4adcf31ec6f620d560355d72574bf86c
2	Bacteria	Firmicutes	Clostridia	Lachnospirales	Lachnospiraceae	[Ruminococcus] gnavus group	[Ruminococcus] gnavus group.10	f213ff3277c4ab22218f31b63291ae12
1	Bacteria	Proteobacteria	Gammaproteobacteria	Enterobacterales	Enterobacteriaceae	Citrobacter	koseri.2	1b477dd331d210fbd41fc777ae007774
1	Bacteria	Firmicutes	Bacilli	Lactobacillales	Streptococcaceae	Streptococcus	gallolyticus.2	084bccab536db2a4e24bf9298050cf98
1	Bacteria	Firmicutes_A	Clostridia	TANB77	CAG-465	CAG-465	CAG-465 sp.2	764c88850abba38b69e92213dc67b045
2	Bacteria	Firmicutes_A	Clostridia	Lachnospirales	Lachnospiraceae	Enterocloster	Enterocloster bolteae/citroniae/clostridioformis	7cd4efa29b942711d9a324e442bd9268
1	Bacteria	Firmicutes	Bacilli	Lactobacillales	Enterococcaceae	Enterococcus	faecalis	e863b5612ffd1322ef8429bd49cba194
4	Bacteria	Firmicutes_A	Clostridia	Lachnospirales	Lachnospiraceae	Ruminococcus_A	Ruminococcus_A sp.2	a38e2e557a08d4b0e1d117f2fbd3e27e
2	Bacteria	Actinobacteriota	Coriobacteriia	Coriobacteriales	Eggerthellaceae	Eggerthella	Eggerthella lenta.1	06f4e7cdceb19af8b47855411e1692ac
2	Bacteria	Firmicutes_A	Clostridia	Lachnospirales	Lachnospiraceae	Blautia	Blautia coccoides	0347445b6784e3d32c70126b005ffa6e
1	Bacteria	Proteobacteria	Gammaproteobacteria	Enterobacterales	Enterobacteriaceae	Enterobacter	Enterobacter.3	be9805562a6ed64294a51d2e2e7dcd18
1	Bacteria	Firmicutes	Clostridia	Peptostreptococcales-Tissierellales	Family XI	Anaerococcus	hydrogenalis.3	a3a8336c56b2fa1ebba3445a86f4e027
1	Bacteria	Bacteroidota	Bacteroidia	Bacteroidales	Tannerellaceae	Parabacteroides	Parabacteroides distasonis_A.1	65667013a3dcab99dd968da5e1161e1d
1	Bacteria	Firmicutes	Negativicutes	Veillonellales-Selenomonadales	Veillonellaceae	Veillonella	parvula.10	60bdf7be684c2146b3ad325b5d22d47d
4	Bacteria	Firmicutes_A	Clostridia	Lachnospirales	Lachnospiraceae	Anaerostipes	Anaerostipes sp.8	3e670ab9c0ed90ac401bc9a371d8e8bd
1	Bacteria	Firmicutes	Negativicutes	Veillonellales-Selenomonadales	Veillonellaceae	Veillonella	atypica.9	a05c70a73d792d1f12d63202458721ae
1	Bacteria	Firmicutes_A	Clostridia	Clostridiales	Clostridiaceae	Clostridium	Clostridium sp.25	58507ef7be43e034745678c0b3a9416e
2	Bacteria	Firmicutes	Bacilli	Lactobacillales	Lactobacillaceae	Lactobacillus	johnsonii	b6c1a8ba78f65c4a4e96627ccc53ac86
1	Bacteria	Actinobacteriota	Actinomycetia	Actinomycetales	Bifidobacteriaceae	Bifidobacterium	Bifidobacterium dentium/moukalabense.3	e5ff9fb5ccb3f0d2cee3b9c8e2ac8172
2	Bacteria	Firmicutes_A	Clostridia	Lachnospirales	Lachnospiraceae	Blautia_A	Blautia_A sp.8	1307bd8c3c2176eef27689067407e770
1	Bacteria	Firmicutes	Clostridia	Lachnospirales	Lachnospiraceae	Lachnospiraceae	Lachnospiraceae.5	cd4fe9b3d17ed587da6a2f17b5f23bc9
1	Bacteria	Firmicutes	Clostridia	Oscillospirales	Ruminococcaceae	Faecalibacterium	prausnitzii.10	b46f9f6567c93928fb3b2ddda521a819
1	Bacteria	Proteobacteria	Gammaproteobacteria	Enterobacterales	Enterobacteriaceae	Escherichia-Shigella	Escherichia-Shigella.7	b6ff57e8f1f58ef67f888436aeea2ef8
1	Bacteria	Firmicutes	Bacilli	Lactobacillales	Streptococcaceae	Streptococcus	Streptococcus.6	daee850bb1358757f13947f650b4ef87
2	Bacteria	Firmicutes_A	Clostridia	Lachnospirales	Lachnospiraceae	Blautia	Blautia sp900541955	265460d89c1d40e3d1e4e3bcf98fcacd
1	Bacteria	Firmicutes	Bacilli	Lactobacillales	Streptococcaceae	Streptococcus	salivarius.19	e7648070ec29b14a3dfd3d342efabe7c
4	Bacteria	Firmicutes_A	Clostridia	Peptostreptococcales	Peptostreptococcaceae	Terrisporobacter	Terrisporobacter sp902363255	9960b20e17a6ebd5bf31b249c3503956
1	Bacteria	Firmicutes	Bacilli	Lactobacillales	Streptococcaceae	Streptococcus	salivarius.20	409f711b59152d57926cf444c5577087
1	Bacteria	Firmicutes	Bacilli	Lactobacillales	Enterococcaceae	Family_Enterococcaceae	Family_Enterococcaceae.15	f411aee57fef885dfac94255b1ad813b
1	Bacteria	Firmicutes	Bacilli	Staphylococcales	Staphylococcaceae	Staphylococcus	Staphylococcus.13	4edfa239a08804da4c6807cc0d4d698b
1	Bacteria	Actinobacteriota	Actinomycetia	Actinomycetales	Bifidobacteriaceae	Bifidobacterium	Bifidobacterium dentium/moukalabense.4	66d5d9f8947998d5f49d929f0ad8013b
4	Bacteria	Firmicutes_A	Clostridia	Oscillospirales	Butyricicoccaceae	Agathobaculum	Agathobaculum butyriciproducens.1	da8b26f82eb70e299518e149ae85f3d9
1	Bacteria	Actinobacteriota	Actinomycetia	Actinomycetales	Actinomycetaceae	Pauljensenia	Pauljensenia radingae_A	c264ff9fb5a55856451868e80f89f4f6
1	Bacteria	Bacteroidota	Bacteroidia	Bacteroidales	Bacteroidaceae	Bacteroides	fragilis.6	b8f4915bec0d4c4fa79ef31d540e3769
1	Bacteria	Firmicutes	Negativicutes	Veillonellales-Selenomonadales	Veillonellaceae	Veillonella	Veillonella.8	0b93befcf48fdcb8fee557c5bc8f1672
1	Bacteria	Proteobacteria	Gammaproteobacteria	Pseudomonadales	Moraxellaceae	Acinetobacter	Acinetobacter sp008017315	bc7ba8807c9e00b5e273b7029e000915
1	Bacteria	Firmicutes_A	Clostridia	Tissierellales	Peptoniphilaceae	Finegoldia	Finegoldia magna/magna_F/magna_H.1	3678d26eb8e3fd26e603acd051347085
4	Bacteria	Firmicutes	Clostridia	Christensenellales	Christensenellaceae	Catabacter	Catabacter	cd7c30498ca6e64224a91e3436ddd087
1	Bacteria	Firmicutes_A	Clostridia	Clostridiales	Clostridiaceae	Clostridium	Clostridium sp.10	34db419abb4bce758654bd6f144c8176
4	Bacteria	Firmicutes_A	Clostridia	Lachnospirales	Lachnospiraceae	Family_Lachnospiraceae	Family_Lachnospiraceae7	3682830d9f222e63e4e35e25b15c9478
1	Bacteria	Proteobacteria	Gammaproteobacteria	Enterobacterales	Enterobacteriaceae	Raoultella	planticola.3	224ce3fcbf9c0b14882605fa09389ebe
1	Bacteria	Fusobacteriota	Fusobacteriia	Fusobacteriales	Fusobacteriaceae	Fusobacterium	Fusobacterium sp.2.1	00dac5691b9b74323553a25af2bbfc43
4	Bacteria	Firmicutes	Clostridia	Lachnospirales	Lachnospiraceae	Lachnospiraceae NK4A136 group	bacterium.1	17fdda78730bfacccea7d1b032ad0de9
1	Bacteria	Actinobacteriota	Actinomycetia	Actinomycetales	Actinomycetaceae	Pauljensenia	Pauljensenia pyogenes_A/sp000308055.2	c4f32c45b39c25336c98927951235733
2	Bacteria	Actinobacteriota	Coriobacteriia	Coriobacteriales	Eggerthellaceae	Eggerthella	Eggerthella sp.	db57577f4e118b32fffd451bf0e6a3a1
1	Bacteria	Actinobacteriota	Actinomycetia	Actinomycetales	Actinomycetaceae	Pauljensenia	Pauljensenia turicensis	a044f0034923d477504b6c43fad82ca2
4	Bacteria	Firmicutes_A	Clostridia	Oscillospirales	Oscillospiraceae	CAG-110	CAG-110 sp.5	5a37280b7ebd0cde9e6913e7b7880380
1	Bacteria	Firmicutes	Bacilli	Lactobacillales	Streptococcaceae	Streptococcus	salivarius.21	0f5f61c4246e0e4d730d2d544f987ddd
1	Bacteria	Actinobacteriota	Actinomycetia	Actinomycetales	Actinomycetaceae	Actinomyces	Actinomyces bowdenii_A/bowdenii_B/sp013185035.1	9a3d3d342f07e6da2320b3fd65ad9ac0
1	Bacteria	Verrucomicrobiota	Verrucomicrobiae	Verrucomicrobiales	Akkermansiaceae	Akkermansia	Akkermansia.3	8cd1e26fd06619c3c9d9438dd0ccf0c3
2	Bacteria	Firmicutes_A	Clostridia	Oscillospirales	Oscillospiraceae	Flavonifractor	Flavonifractor plautii/sp000508885.3	aecd6eea769f8326105fcea9058f2b41
1	Bacteria	Firmicutes	Clostridia	Oscillospirales	Ruminococcaceae	Faecalibacterium	prausnitzii.11	cdbd0157068bf2682a52a57e612de078
1	Bacteria	Firmicutes	Negativicutes	Veillonellales-Selenomonadales	Veillonellaceae	Veillonella	Veillonella.9	fab97a4ef535bdbf1a5f6c7204f63528
1	Bacteria	Verrucomicrobiota	Verrucomicrobiae	Verrucomicrobiales	Akkermansiaceae	Akkermansia	muciniphila.1	1348236911314d555c72403cbaa9da06
1	Bacteria	Firmicutes	Bacilli	Erysipelotrichales	Erysipelatoclostridiaceae	Erysipelatoclostridium	Erysipelatoclostridium.3	1aacbbe24d5037ee8717ee7bc615ae60
4	Bacteria	Firmicutes_A	Clostridia	Lachnospirales	Lachnospiraceae	Coprococcus	Coprococcus eutactus	1a124d3ab1b5ba2f5942855433a69752
2	Bacteria	Firmicutes	Bacilli	Lactobacillales	Streptococcaceae	Streptococcus	salivarius.22	a4cd6152db4ba6371bd3d35fcda62a19
1	Bacteria	Firmicutes	Clostridia	Eubacteriales	Eubacteriaceae	Pseudoramibacter	Pseudoramibacter.1	a0a666ee813e9fd87f37d500fd6f8d34
4	Bacteria	Firmicutes_A	Clostridia	Lachnospirales	Lachnospiraceae	Lachnospira	Lachnospira sp.7	f664a73e7de6e00ff70e013369499cbd
4	Bacteria	Firmicutes_A	Clostridia	Lachnospirales	Lachnospiraceae	CAG-45	CAG-45 sp000438375	417b0f3e508358fd781eee9ff9f97c9f
4	Bacteria	Actinobacteriota	Coriobacteriia	Coriobacteriales	Eggerthellaceae	Eggerthellaceae	Eggerthellaceae	9cdd06e4c33c58bbb4e46a743fd15c5b
4	Bacteria	Proteobacteria	Gammaproteobacteria	Burkholderiales	Burkholderiaceae	Parasutterella	Parasutterella excrementihominis/sp000980495.1	a8f3507ee57026a970e37ec26a53554f
2	Bacteria	Actinobacteriota	Coriobacteriia	Coriobacteriales	Coriobacteriaceae	Collinsella	Collinsella intestinalis/sp003479805/stercoris.1	c8dc9b3d3fe7d5d30227f040164be382
1	Bacteria	Firmicutes	Negativicutes	Veillonellales-Selenomonadales	Veillonellaceae	Veillonella	atypica.10	d441db755be2ef30089a1ef12524249b
1	Bacteria	Bacteroidota	Bacteroidia	Bacteroidales	Porphyromonadaceae	Porphyromonas	asaccharolytica	90f6d5615542790cb8cd00ef7c57fe3a
1	Bacteria	Bacteroidota	Bacteroidia	Bacteroidales	Prevotellaceae	Prevotella_9	Prevotella_9.7	e1e3d4305dcd050147d2d430a12d09ce
2	Bacteria	Firmicutes	Clostridia	Lachnospirales	Lachnospiraceae	Anaerostipes	Anaerostipes.2	29f48f00058d80316f9cbe94f29a9cd7
2	Bacteria	Firmicutes	Negativicutes	Veillonellales-Selenomonadales	Veillonellaceae	Veillonella	ratti.8	6623cebbaaeb0a2a66abe5a6dbdd8845
1	Bacteria	Firmicutes_A	Clostridia	Peptostreptococcales	Peptostreptococcaceae	Terrisporobacter	Terrisporobacter sp902363255.1	9a95c71560de6fcbdcf11de54ae99c5c
4	Bacteria	Bacteroidota	Bacteroidia	Bacteroidales	Tannerellaceae	Parabacteroides	Parabacteroides distasonis.1	e5225d9ad60cd54861511a228f4809fd
1	Bacteria	Firmicutes_A	Clostridia	Oscillospirales	Ruminococcaceae	Gemmiger	Gemmiger sp.12	64b22677140c7b84225f980f4e1016d0
1	Bacteria	Firmicutes	Negativicutes	Veillonellales-Selenomonadales	Veillonellaceae	Veillonella	parvula.11	6e32e79113e02ccb3214963d4a7fa72f
2	Bacteria	Firmicutes	Clostridia	Lachnospirales	Lachnospiraceae	Blautia	hydrogenotrophica	02b216ad52190377ae2633a0eaf88526
2	Bacteria	Verrucomicrobiota	Verrucomicrobiae	Verrucomicrobiales	Akkermansiaceae	Akkermansia	muciniphila.2	a53372ebe4764193d1abd5e5fda85825
1	Bacteria	Firmicutes	Clostridia	Lachnospirales	Lachnospiraceae	Agathobacter	Agathobacter.7	7eeac7128137612acd170d4671fd41f8
1	Bacteria	Bacteroidota	Bacteroidia	Bacteroidales	Porphyromonadaceae	Porphyromonas	Porphyromonas.1	d386863b6a0565708ae63f7aec6cec88
1	Bacteria	Firmicutes	Bacilli	Staphylococcales	Staphylococcaceae	Staphylococcus	Staphylococcus.14	2e277e7fdb42a1f08b681829c2ac01d1
2	Bacteria	Firmicutes_A	Clostridia	Lachnospirales	Lachnospiraceae	Schaedlerella	Schaedlerella sp.2.1	f80cf2b4934df2973d51da41dfdb0d8c
1	Bacteria	Proteobacteria	Gammaproteobacteria	Enterobacterales	Enterobacteriaceae	Escherichia-Shigella	boydii	7d93adbda9438310d2faad266340309a
1	Bacteria	Firmicutes	Bacilli	Lactobacillales	Streptococcaceae	Streptococcus	peroris	404a25fde1b9a0e4df06c17ccdbc555a
4	Bacteria	Firmicutes	Bacilli	Lactobacillales	Streptococcaceae	Lactococcus	Lactococcus hampsonii_B/lactis/lactis_A/lactis_E/sp003627095/sp004210295/sp006965445.1	ec098ad12ef2923b449a01762462578b
1	Bacteria	Firmicutes	Clostridia	Lachnospirales	Lachnospiraceae	Anaerosporobacter	Anaerosporobacter	657e7b84024e6fc2332d140421e4be7f
1	Bacteria	Firmicutes_A	Clostridia	Clostridiales	Clostridiaceae	Clostridium_P	Clostridium_P perfringens.3	db48620231533dd54fd8c5517fa08375
2	Bacteria	Firmicutes	Bacilli	Staphylococcales	Gemellaceae	Gemella	Gemella	2f97492ef9c9571e2e76166dde9d64eb
1	Bacteria	Firmicutes	Bacilli	Staphylococcales	Staphylococcaceae	Staphylococcus	epidermidis.1	e6bca77dc08d6f1ae3c0e81a10801fde
1	Bacteria	Firmicutes_A	Clostridia	Lachnospirales	Lachnospiraceae	Anaerobutyricum	Anaerobutyricum soehngenii.1	dc1b75af6b5e22c9722b19d97ffcce8a
2	Bacteria	Bacteroidota	Bacteroidia	Bacteroidales	Bacteroidaceae	Bacteroides	fragilis.7	26547c96837ae7efcfa67fca0cc71140
1	Bacteria	Firmicutes	Clostridia	Oscillospirales	Ruminococcaceae	Faecalibacterium	prausnitzii.12	734dcd020504800d8042434e28b57298
1	Bacteria	Firmicutes	Bacilli	Lactobacillales	Lactobacillaceae	Pediococcus	Pediococcus acidilactici/acidilactici_A/claussenii	a6bc3e3d87c6d3fc508d3c41320895be
1	Bacteria	Firmicutes_A	Clostridia	Monoglobales_A	UBA1381	CAG-41	CAG-41 sp900066215.2	0143a56823b13e45ff9b35f66772ddb1
1	Bacteria	Firmicutes	Clostridia	Oscillospirales	Ruminococcaceae	Faecalibacterium	Faecalibacterium.5	6aecdefb54ce134bd38af02b1c7e7187
1	Bacteria	Firmicutes	Bacilli	Erysipelotrichales	Erysipelatoclostridiaceae	Erysipelatoclostridium	ramosum.3	53d8f094ceaba1f2f7cdafde0e20a53a
1	Bacteria	Actinobacteriota	Actinomycetia	Actinomycetales	Actinomycetaceae	Pauljensenia	Pauljensenia pyogenes_A/sp000308055.3	05cd10f8f12211bac35303f8a5b93b9f
4	Bacteria	Firmicutes_A	Clostridia	Peptostreptococcales	Peptostreptococcaceae	Terrisporobacter	Terrisporobacter othiniensis.1	eef556a47f236aa10eccc36fb7f8d469
1	Bacteria	Firmicutes	Clostridia	Lachnospirales	Lachnospiraceae	Agathobacter	Agathobacter.8	4810aa3f7bf60ed42d3deebeb6e6220f
1	Bacteria	Proteobacteria	Gammaproteobacteria	Enterobacterales	Pasteurellaceae	Haemophilus	parainfluenzae.3	87de2eb4c03fc0e1b49d08f88e0f1b2b
1	Bacteria	Actinobacteriota	Actinobacteria	Bifidobacteriales	Bifidobacteriaceae	Bifidobacterium	longum.11	143173552db6962f9770a76361a682df
1	Bacteria	Proteobacteria	Gammaproteobacteria	Enterobacterales	Enterobacteriaceae	Enterobacteriaceae	Enterobacteriaceae.2	e7b82dbafceec1cc45433f8c294a2ce3
1	Bacteria	Bacteroidota	Bacteroidia	Bacteroidales	Tannerellaceae	Parabacteroides	Parabacteroides distasonis.2	5d965afcd260b8ba332d7f7e27916dde
1	Bacteria	Proteobacteria	Gammaproteobacteria	Pseudomonadales	Moraxellaceae	Psychrobacter	celer	a0b56f519d50fd49bd3f955d0905457b
1	Bacteria	Actinobacteriota	Coriobacteriia	Coriobacteriales	Eggerthellaceae	Senegalimassilia	Senegalimassilia.1	69d79dac5db36addd2e6f0554bc24a03
2	Bacteria	Actinobacteriota	Actinomycetia	Actinomycetales	Actinomycetaceae	Pauljensenia	Pauljensenia odontolytica/odontolytica_A/odontolytica_B/odontolytica_C/sp000185285/sp000411415/sp000466265/sp001064145/sp001072465/sp001838165.4	4afc0fd4d814283811c8102084f7784f
1	Bacteria	Firmicutes	Bacilli	Lactobacillales	Streptococcaceae	Streptococcus	Streptococcus.7	e6762de2614b218cabc331f24ce04d75
4	Bacteria	Firmicutes_A	Clostridia	Oscillospirales	Oscillospiraceae	ER4	ER4 sp000765235	bf37c87f8841a9f1a2cd20db4fa18b74
1	Bacteria	Firmicutes_C	Negativicutes	Acidaminococcales	Acidaminococcaceae	Phascolarctobacterium_A	Phascolarctobacterium_A sp900544885/succinatutens.1	85b2da37bb23efc7a763c09de329b139
1	Bacteria	Bacteroidota	Bacteroidia	Bacteroidales	Prevotellaceae	Prevotella_9	copri	810e842522acdfbd854daa85cb87d469
1	Bacteria	Proteobacteria	Gammaproteobacteria	Enterobacterales	Enterobacteriaceae	Raoultella	planticola.4	b8310402149b61f1f97b03e9107a2db6
1	Bacteria	Firmicutes_C	Negativicutes	Veillonellales	Dialisteraceae	Dialister	Dialister sp900543165	7215a83aa5df7b61f73f56d86fc7a9e4
1	Bacteria	Firmicutes_A	Clostridia	Clostridiales	Clostridiaceae	Clostridium	Clostridium baratii/sp000498355	4ce8c6fa9cd617b7dcb9a856ecc6898b
1	Bacteria	Firmicutes	Bacilli	Erysipelotrichales	Erysipelotrichaceae	Holdemanella	Holdemanella biformis	5637d394610c0babc11f8cd08ec29efe
1	Bacteria	Proteobacteria	Gammaproteobacteria	Enterobacterales	Enterobacteriaceae	Morganella	Morganella morganii_A/morganii_B	6bfc304ab75c9cfcf437193c5b99778c
1	Bacteria	Firmicutes	Clostridia	Clostridiales	Clostridiaceae	Clostridium sensu stricto 1	Clostridium sensu stricto 1.7	f23dffb16b79d27f1d06f55ddf61298f
1	Bacteria	Firmicutes	Bacilli	Erysipelotrichales	Erysipelotrichaceae	[Clostridium] innocuum group	[Clostridium] innocuum group.2	86a663d8b1efc243a54cdf4e691e4ef3
1	Bacteria	Proteobacteria	Gammaproteobacteria	Enterobacterales	Enterobacteriaceae	Enterobacter	hormaechei.2	9ac0bb36b7100c993ceea7c296b43bcc
4	Bacteria	Firmicutes_A	Clostridia	Oscillospirales	Ruminococcaceae	Ruminococcus	Ruminococcus sp.3	c1eedbcfde0ec278a15691f85ef9055b
1	Bacteria	Campylobacterota	Campylobacteria	Campylobacterales	Campylobacteraceae	Campylobacter	curvus	6127039c2a66ec5995f4b9cd2fbf5fce
1	Bacteria	Firmicutes	Bacilli	Erysipelotrichales	Erysipelatoclostridiaceae	Faecalibacillus	Faecalibacillus faecis/intestinalis/sp900762515.3	e679da95cd3ac1a07d47d4d1d03d5e24
4	Bacteria	Firmicutes_A	Clostridia	TANB77	CAG-508	UMGS1994	UMGS1994 sp.3	d347cad164508355e12daadf9ccea765
1	Bacteria	Firmicutes	Negativicutes	Veillonellales-Selenomonadales	Veillonellaceae	Veillonella	Veillonella.10	f58780c42d4fdf9e1e64a1bd4667d8e1
4	Bacteria	Firmicutes	Clostridia	Oscillospirales	Ruminococcaceae	Subdoligranulum	Subdoligranulum.3	3849a087df9ee1a30d05d6464cae2049
1	Bacteria	Firmicutes	Clostridia	Oscillospirales	Ruminococcaceae	Faecalibacterium	prausnitzii.13	afe0cc61eca3c017e8ae677cd0bb3000
1	Bacteria	Firmicutes	Bacilli	Erysipelotrichales	Erysipelotrichaceae	Clostridium_AQ	Clostridium_AQ innocuum/sp900755895.3	b0c4dcd5509c7ce57f4e57857316eee2
1	Bacteria	Firmicutes_C	Negativicutes	Veillonellales	Megasphaeraceae	Megasphaera	Megasphaera elsdenii/sp000417505.2	2dd3d28b8bcefe0b263b3d6caf8b29a6
4	Bacteria	Actinobacteriota	Coriobacteriia	Coriobacteriales	Eggerthellaceae	Family_Eggerthellaceae	Family_Eggerthellaceae	63ae69e5112e904373fa2c6a38d8a5b9
1	Bacteria	Firmicutes_A	Clostridia	Lachnospirales	Lachnospiraceae	Butyrivibrio_A	Butyrivibrio_A crossotus	478739167292e4f93f1eb7aceb2e3e81
4	Bacteria	Bacteroidota	Bacteroidia	Bacteroidales	Bacteroidaceae	Prevotella	Prevotella rara.1	4020df7deec186db39e3dfad22abfa46
2	Bacteria	Firmicutes_A	Clostridia	Oscillospirales	Ruminococcaceae	Gemmiger	Gemmiger sp900540595.2	0244a1327b5358acda0ec08e4fc5a67c
1	Bacteria	Proteobacteria	Gammaproteobacteria	Enterobacterales	Enterobacteriaceae	Escherichia-Shigella	Escherichia-Shigella.8	ae3da95dd43d17c34af721aedcdfe92a
1	Bacteria	Bacteroidota	Bacteroidia	Bacteroidales	Porphyromonadaceae	Porphyromonas	Porphyromonas.2	31a59353d7a0e75f12dea0b6f8621828
1	Bacteria	Firmicutes	Clostridia	Lachnospirales	Lachnospiraceae	Anaerostipes	hadrus.8	c7b4b3624cda2445ae9ebd280d8ae09d
1	Bacteria	Firmicutes	Clostridia	Oscillospirales	Ruminococcaceae	Faecalibacterium	prausnitzii.14	461304162ad54d4617935f8cc0c09ba3
1	Bacteria	Actinobacteriota	Coriobacteriia	Coriobacteriales	Eggerthellaceae	Slackia	Slackia	9db82b21d1c5175ea24add33bbd06786
1	Bacteria	Firmicutes	Clostridia	Lachnospirales	Lachnospiraceae	Lachnoclostridium	Lachnoclostridium.9	9b034dda96a9675588ca188b3fbf9d2c
1	Bacteria	Firmicutes_C	Negativicutes	Acidaminococcales	Acidaminococcaceae	Phascolarctobacterium_A	Phascolarctobacterium_A sp900544885/succinatutens.2	20913612f7b9c432e4a1ab21ab4b6104
1	Bacteria	Proteobacteria	Gammaproteobacteria	Enterobacterales	Enterobacteriaceae	Enterobacter	hormaechei.3	e2f1763cc76bbd845827dbf809f00b83
4	Bacteria	Firmicutes_C	Negativicutes	Veillonellales	Dialisteraceae	Dialister	Dialister sp900765565/wadsworthia	0b9d6ae30698fe3144a187eaaafdaef8
1	Bacteria	Firmicutes_A	Clostridia	Oscillospirales	Oscillospiraceae	Intestinimonas	Intestinimonas sp.2.1	82537205a05dde72718e5ce653d22267
1	Bacteria	Firmicutes	Bacilli	Lactobacillales	Streptococcaceae	Streptococcus	gallolyticus.3	13f7a1ef880f3b73eeffa18951ffe96f
1	Bacteria	Firmicutes	Bacilli	Lactobacillales	Streptococcaceae	Streptococcus	thermophilus.2	c0f4403e24d4706a057a0074932ccef5
2	Bacteria	Firmicutes	Clostridia	Lachnospirales	Lachnospiraceae	[Ruminococcus] gnavus group	[Ruminococcus] gnavus group.11	b818726d500288d7dceb8be82e7acb53
1	Bacteria	Firmicutes	Bacilli	Staphylococcales	Staphylococcaceae	Staphylococcus	Staphylococcus.15	f7a123d7ad00a095c162230b1723818c
1	Bacteria	Firmicutes_C	Negativicutes	Veillonellales	Megasphaeraceae	Megasphaera	Megasphaera sp001546855	160f59b8faeb72b39cf724fab5055cf2
1	Bacteria	Bacteroidota	Bacteroidia	Bacteroidales	Prevotellaceae	Prevotella_7	buccae.1	76c0044b585270b659c5bf88d7f9de48
2	Bacteria	Firmicutes_A	Clostridia	TANB77	CAG-508	Family_CAG-508	Family_CAG-5085	dd5ab77cffe1250c4d27b1a548965bb5
1	Bacteria	Actinobacteriota	Actinobacteria	Actinomycetales	Actinomycetaceae	Actinomyces	graevenitzii	81faaa92f5dd84af2143b671a9514426
1	Bacteria	Bacteroidota	Bacteroidia	Bacteroidales	Bacteroidaceae	Bacteroides	ovatus.9	ef496cf105e32960ab0bc8e8cdec1ab2
1	Bacteria	Actinobacteriota	Coriobacteriia	Coriobacteriales	Eggerthellaceae	Gordonibacter	Gordonibacter pamelaeae.1	e960da225d7409457e8417a482d3dfb6
1	Bacteria	Firmicutes_A	Clostridia	Oscillospirales	Acutalibacteraceae	Ruminococcus_E	Ruminococcus_E sp..1	c2325a31d284b4a3daa18682d1168d9b
4	Bacteria	Bacteroidota	Bacteroidia	Bacteroidales	Tannerellaceae	Parabacteroides	Parabacteroides sp.31.6	218f40f443caf002f5ad5aa59ee08859
4	Bacteria	Firmicutes_A	Clostridia	Oscillospirales	Ruminococcaceae	Ruminococcus_C	Ruminococcus_C callidus.1	1247c5b288754a2af23a12dfc3c6fc87
2	Bacteria	Firmicutes	Clostridia	Lachnospirales	Lachnospiraceae	Lactonifactor	Lactonifactor	886d977c65c2e2e4334d40d5944e23a0
4	Bacteria	Bacteroidota	Bacteroidia	Bacteroidales	Bacteroidaceae	Bacteroides	ovatus.10	b0cce80cd5e1c78e70e026edb63a65f9
1	Bacteria	Firmicutes	Clostridia	Peptostreptococcales-Tissierellales	Family XI	Anaerococcus	hydrogenalis.4	87d17399c958c7d21205263fb4a713d4
1	Bacteria	Proteobacteria	Gammaproteobacteria	Pseudomonadales	Moraxellaceae	Acinetobacter	Acinetobacter sp008017315.1	5ff7d6673fd7801ad2b5cc9a1bdd7475
1	Bacteria	Firmicutes	Bacilli	Lactobacillales	Streptococcaceae	Streptococcus	peroris.1	27aa495f0baec60d5180f73a24adeed5
1	Bacteria	Firmicutes	Negativicutes	Veillonellales-Selenomonadales	Veillonellaceae	Veillonella	Veillonella.11	e428ef1fa68dd6fde52de63e84aa1a27
1	Bacteria	Firmicutes_C	Negativicutes	Acidaminococcales	Acidaminococcaceae	Phascolarctobacterium_A	Phascolarctobacterium_A sp900544885/succinatutens.3	b48fb3fd0943aff801af07753e29a067
4	Bacteria	Firmicutes_A	Clostridia	Lachnospirales	Lachnospiraceae	Lachnospira	Lachnospira sp003451515	202938f6ff9392b6e167b20b956d9ed1
1	Bacteria	Proteobacteria	Gammaproteobacteria	Enterobacterales	Pasteurellaceae	Haemophilus	parainfluenzae.4	bb1c89fc41d3ec66aa7c312ba975e118
1	Bacteria	Proteobacteria	Gammaproteobacteria	Enterobacterales	Enterobacteriaceae	Klebsiella	pneumoniae.4	d527f3417b48eff6d157214c06c50ad6
4	Bacteria	Firmicutes	Clostridia	Lachnospirales	Lachnospiraceae	Lachnospiraceae	Lachnospiraceae.6	3a3d4a6c3adbc15db31a2243014c1c22
1	Bacteria	Firmicutes	Bacilli	Staphylococcales	Staphylococcaceae	Staphylococcus	aureus.2	04be702b895fe5ed0568344daf564276
1	Bacteria	Firmicutes	Bacilli	Lactobacillales	Streptococcaceae	Streptococcus	constellatus	e654e52c906641a46afddd91d50e6b12
2	Bacteria	Firmicutes	Bacilli	Erysipelotrichales	Erysipelatoclostridiaceae	Longibaculum	Longibaculum sp900538465	b52cd8c186d511e8e4bad72d8bfbf0ed
1	Bacteria	Firmicutes	Clostridia	Peptostreptococcales-Tissierellales	Family XI	Anaerococcus	prevotii.1	ead034c20ec389f7f9d1c917cdc9d39c
1	Bacteria	Firmicutes	Clostridia	Christensenellales	Christensenellaceae	Christensenellaceae R-7 group	Christensenellaceae R-7 group.5	76956813f81951d23e62a56d9784b791
2	Bacteria	Firmicutes_A	Clostridia	Clostridiales	Clostridiaceae	Clostridium	Clostridium sp.16	9c36a6023c3b9019c8bee4707901024c
1	Bacteria	Actinobacteriota	Actinobacteria	Micrococcales	Micrococcaceae	Rothia	mucilaginosa.2	f0537a8dcbfb7b18465d751de034e9ae
4	Bacteria	Firmicutes	Bacilli	Lactobacillales	Streptococcaceae	Streptococcus	sanguinis	d3829c53b66db828d6bff7f21c6dad28
1	Bacteria	Proteobacteria	Gammaproteobacteria	Enterobacterales	Enterobacteriaceae	Salmonella	enterica	a0fa0fdb5e8d8c8598d96bbbff1a1ff4
1	Bacteria	Proteobacteria	Gammaproteobacteria	Enterobacterales	Enterobacteriaceae	Escherichia-Shigella	Escherichia-Shigella.9	a67d40962f2b91643e8525c3295e544e
1	Bacteria	Firmicutes	Bacilli	Lactobacillales	Enterococcaceae	Family_Enterococcaceae	Family_Enterococcaceae.16	684243f7cf13f91eddccc29feaaae1a1
1	Bacteria	Firmicutes	Bacilli	Lactobacillales	Streptococcaceae	Streptococcus	salivarius.23	9380d59e4812fd258dd0f5a54b4f4446
1	Bacteria	Bacteroidota	Bacteroidia	Bacteroidales	Bacteroidaceae	Bacteroides	fragilis.8	d2439c3931ecf91a676f1a881d4aa49d
1	Bacteria	Actinobacteriota	Actinobacteria	Micrococcales	Micrococcaceae	Rothia	mucilaginosa.3	f9a83208c6dbad07b3ba9e48ca1c2e25
1	Bacteria	Proteobacteria	Gammaproteobacteria	Pseudomonadales	Moraxellaceae	Acinetobacter	towneri	157ba9d2b318f400b654ab995f7d7d4e
1	Bacteria	Firmicutes	Bacilli	Staphylococcales	Staphylococcaceae	Staphylococcus	Staphylococcus.16	7709c865075e107b72f91bf797d2a538
1	Bacteria	Firmicutes	Clostridia	Clostridia UCG-014	Clostridia UCG-014	Clostridia UCG-014	Clostridia UCG-014.3	715ca1e1f9b23980e0fb0807fc943d81
4	Bacteria	Firmicutes_A	Clostridia	Lachnospirales	Lachnospiraceae	Family_Lachnospiraceae	Family_Lachnospiraceae12	b61ab877a65a7d6819bd4ac9c60edb91
2	Bacteria	Firmicutes	Bacilli	Erysipelotrichales	Erysipelatoclostridiaceae	Erysipelatoclostridium	ramosum.4	2bcef3c0085f1b68f15e757971e018cd
2	Bacteria	Actinobacteriota	Actinobacteria	Bifidobacteriales	Bifidobacteriaceae	Bifidobacterium	catenulatum.4	c1120a9cf0f46021a4c73be818e24caa
1	Bacteria	Bacteroidota	Bacteroidia	Bacteroidales	Tannerellaceae	Parabacteroides	Parabacteroides sp.31.7	15127aeadabba2428ad4b4ef15a2e7da
4	Bacteria	Firmicutes_A	Clostridia	Oscillospirales	Acutalibacteraceae	CAG-177	CAG-177 sp.	34f6a9f2891692941ec6fdb0095c4012
1	Bacteria	Firmicutes	Clostridia	Oscillospirales	Ruminococcaceae	Subdoligranulum	Subdoligranulum.4	0f4dc3c56caf2490af385f59dabdbf93
4	Bacteria	Firmicutes_A	Clostridia	Lachnospirales	Lachnospiraceae	Ruminococcus_A	Ruminococcus_A sp.3	eade09d04eb52d7a721a7229ced3bf6d
2	Bacteria	Actinobacteriota	Actinobacteria	Bifidobacteriales	Bifidobacteriaceae	Bifidobacterium	longum.12	eeb18c02067a51d0440b149fe222ad1a
2	Bacteria	Firmicutes	Negativicutes	Veillonellales-Selenomonadales	Veillonellaceae	Megasphaera	micronuciformis.4	86878104d225141d3c776ef17529ca4b
2	Bacteria	Firmicutes_A	Clostridia	Lachnospirales	Lachnospiraceae	Clostridium_Q	Clostridium_Q sp.	6c20f1b2c627ffe458a8e9d6d7a9c93c
2	Bacteria	Actinobacteriota	Actinobacteria	Bifidobacteriales	Bifidobacteriaceae	Bifidobacterium	longum.13	cef135e68f9252e0a8e778512aa6e25c
1	Bacteria	Firmicutes	Bacilli	Lactobacillales	Lactobacillaceae	Lacticaseibacillus	Lacticaseibacillus rhamnosus.2	07547eedaa922ab2361de94a4f8b6122
2	Bacteria	Proteobacteria	Gammaproteobacteria	Enterobacterales	Enterobacteriaceae	Escherichia-Shigella	Escherichia-Shigella.10	1658c615a44348771573e5d4e9deee33
1	Bacteria	Proteobacteria	Gammaproteobacteria	Enterobacterales	Enterobacteriaceae	Klebsiella	michiganensis.1	7c299037f7f1591b29c9b3d917b662af
4	Bacteria	Firmicutes_A	Clostridia	Lachnospirales	Lachnospiraceae	UBA7160	UBA7160 sp.	442b04ca5590bef3123b3a8f10b8e033
1	Bacteria	Firmicutes	Bacilli	Lactobacillales	Enterococcaceae	Family_Enterococcaceae	Family_Enterococcaceae.17	0f762e7a14de70b9893f8480738dac48
1	Bacteria	Firmicutes	Negativicutes	Veillonellales-Selenomonadales	Veillonellaceae	Negativicoccus	massiliensis.3	2a77d5cebbda93a5ec2f4cab7e15b08e
1	Bacteria	Bacteroidota	Bacteroidia	Bacteroidales	Bacteroidaceae	Phocaeicola	Phocaeicola coprocola	116a9efec347dcdd9a424cf8c3dedc4f
1	Bacteria	Firmicutes	Clostridia	Oscillospirales	Ruminococcaceae	Faecalibacterium	prausnitzii.15	6a2d66a40151c5c0fdefd1f286840e5f
1	Bacteria	Firmicutes	Clostridia	Peptostreptococcales-Tissierellales	Family XI	Anaerococcus	mediterraneensis	5bdb2ac353127cd55b0edc0da340f948
2	Bacteria	Firmicutes	Clostridia	Oscillospirales	Butyricicoccaceae	Butyricicoccus	pullicaecorum	4435c462e118e49cda161881b6e7e43a
1	Bacteria	Firmicutes	Clostridia	Lachnospirales	Lachnospiraceae	Anaerostipes	hadrus.9	1fa24d64639f14e77630076887f5524c
1	Bacteria	Firmicutes	Negativicutes	Veillonellales-Selenomonadales	Veillonellaceae	Veillonella	atypica.11	bf923b26ba5315dae49ba9564273e32a
2	Bacteria	Firmicutes_A	Clostridia	Lachnospirales	Lachnospiraceae	Sellimonas	Sellimonas intestinalis.1	6b848edd5e6addf3329617c46b3c83a1
1	Bacteria	Bacteroidota	Bacteroidia	Bacteroidales	Prevotellaceae	Prevotella_9	Prevotella_9.8	8eb4e34fd58ab95fa2efab34940c01fa
1	Bacteria	Firmicutes	Bacilli	Lactobacillales	Enterococcaceae	Family_Enterococcaceae	Family_Enterococcaceae.18	3349550d864a82e4079824a15cd5754b
1	Bacteria	Bacteroidota	Bacteroidia	Bacteroidales	Porphyromonadaceae	Porphyromonas	Porphyromonas.3	93d06c54530bc8f7d75ba1ee8fd40a5f
2	Bacteria	Firmicutes	Clostridia	Peptostreptococcales-Tissierellales	Peptostreptococcaceae	Intestinibacter	bartlettii	d9d2f801acfc9bec01df068293df6b94
2	Bacteria	Actinobacteriota	Coriobacteriia	Coriobacteriales	Coriobacteriaceae	Collinsella	Collinsella aerofaciens/aerofaciens_A/aerofaciens_E/aerofaciens_F/aerofaciens_G/aerofaciens_H/aerofaciens_J/aerofaciens_L/aerofaciens_N/sp000434535/sp000763055/sp002232035/sp003436275/sp003437035/sp003438495/sp003439125/sp003458415/sp003459245/sp003459505/sp003462685/sp003465825/sp003466125/sp003469185/sp003469205/sp003470665/sp003471585/sp003487125/sp004554255/sp900540895/sp900541015/sp900541025…	a754428a15b3a60590939f2ab0861cd0
4	Bacteria	Firmicutes	Clostridia	Oscillospirales	Oscillospiraceae	NK4A214 group	NK4A214 group.2	18efcaa46f91704bb6ea1f2c915ed1a2
1	Bacteria	Firmicutes	Clostridia	Peptostreptococcales-Tissierellales	Family XI	Anaerococcus	Anaerococcus.1	d41fa902b07f08a4929e50c0eb0bd1c4
1	Bacteria	Firmicutes_C	Negativicutes	Veillonellales	Megasphaeraceae	Megasphaera	Megasphaera sp001546855.1	48b2e769eff17ea8a66ecbc5e5b79f54
4	Bacteria	Firmicutes_A	Clostridia_A	Christensenellales	CAG-74	UBA11524	UBA11524 sp..1	4d73e64623860d4ac7fc52b694a4bd2b
4	Bacteria	Firmicutes_A	Clostridia	Oscillospirales	Acutalibacteraceae	Family_Acutalibacteraceae	Family_Acutalibacteraceae6.1	6a57339163b1db2da81ab332dc9b1823
1	Bacteria	Proteobacteria	Gammaproteobacteria	Enterobacterales	Enterobacteriaceae	Citrobacter	Citrobacter.1	fdea2df32864f30ff0d4e7d4a096de70
2	Bacteria	Proteobacteria	Gammaproteobacteria	Burkholderiales	Burkholderiaceae	Parasutterella	Parasutterella excrementihominis/sp000980495.2	2dbfae7250efa55031d863ee039b5949
1	Bacteria	Firmicutes_A	Clostridia	Clostridiales	Clostridiaceae	Clostridium	Clostridium butyricum/sp012843905	26f5fefce8bafd0c1933143ffd471ebc
4	Bacteria	Firmicutes	Clostridia	Lachnospirales	Lachnospiraceae	Agathobacter	Agathobacter.9	6e4293ddd04d53d1499b9e703dd1e4dc
4	Bacteria	Firmicutes	Clostridia	Oscillospirales	Ruminococcaceae	Faecalibacterium	Faecalibacterium.6	22f4ee9a41a4d73580bf7ade8e9e017a
1	Bacteria	Firmicutes	Negativicutes	Veillonellales-Selenomonadales	Veillonellaceae	Veillonella	atypica.12	27896967b06ffc7a0d50964c0874bcb5
1	Bacteria	Firmicutes	Bacilli	Lactobacillales	Lactobacillaceae	Lactobacillus	amylovorus.1	d6eb6ac8ab8ea7a5de3ced31fc51500a
4	Bacteria	Firmicutes	Clostridia	Lachnospirales	Lachnospiraceae	[Eubacterium] hallii group	[Eubacterium] hallii group	7ca0f3e1e07728ab78f54b3770156d1c
2	Bacteria	Firmicutes	Bacilli	Lactobacillales	Streptococcaceae	Streptococcus	oralis.2	75404d59854cdd2500d94f233e42480a
1	Bacteria	Firmicutes_A	Clostridia	Clostridiales	Clostridiaceae	Clostridium	Clostridium paraputrificum	8878a0465f5d22d1c56917fe650a7df3
1	Bacteria	Firmicutes	Clostridia	Peptostreptococcales-Tissierellales	Family XI	Finegoldia	magna	ad9833d905059be24e9bbf17cefd4ee0
4	Bacteria	Firmicutes	Clostridia	Lachnospirales	Lachnospiraceae	Sellimonas	Sellimonas.3	50ef4b6ac91b2cddcb87cfe5a3b622f8
1	Bacteria	Firmicutes_C	Negativicutes	Veillonellales	Negativicoccaceae	Negativicoccus	Negativicoccus succinicivorans	65bcf2144f162bbb047c393123d43921
2	Bacteria	Firmicutes	Bacilli	Lactobacillales	Lactobacillaceae	Limosilactobacillus	Limosilactobacillus fermentum.5	534ce806f307fb585fd72223774b3f9e
1	Bacteria	Firmicutes	Bacilli	Lactobacillales	Streptococcaceae	Streptococcus	parasanguinis.4	dc8046dd7c5b0960f3740646e28161f5
1	Bacteria	Firmicutes_A	Clostridia	Tissierellales	Peptoniphilaceae	Peptoniphilus_A	Peptoniphilus_A harei/lacydonensis/phoceensis/senegalensis/sp900538655.1	62fa84d7e105e85e81d81bb1319a10ed
1	Bacteria	Firmicutes	Bacilli	Lactobacillales	Streptococcaceae	Streptococcus	oralis.3	a5feea11163d39ad7879569aea1c0279
1	Bacteria	Actinobacteriota	Actinobacteria	Corynebacteriales	Corynebacteriaceae	Corynebacteriaceae	Corynebacteriaceae	3880f6795fa082549eef51a4c888cd31
1	Bacteria	Bacteroidota	Bacteroidia	Bacteroidales	Bacteroidaceae	Bacteroides	dorei.6	4d5acf2223b6913681506a0a76b990ab
1	Bacteria	Proteobacteria	Gammaproteobacteria	Enterobacterales	Enterobacteriaceae	Klebsiella	michiganensis.2	a6c0f44c18cc7f5a59e4e82ae8179862
1	Bacteria	Proteobacteria	Gammaproteobacteria	Enterobacterales	Enterobacteriaceae	Escherichia-Shigella	coli.8	4b729b162535fcc01b4ff0ca1b14f9da
4	Bacteria	Actinobacteriota	Coriobacteriia	Coriobacteriales	Coriobacteriaceae	Collinsella	Collinsella aerofaciens/aerofaciens_A/aerofaciens_E/aerofaciens_F/aerofaciens_G/aerofaciens_H/aerofaciens_J/aerofaciens_L/aerofaciens_N/sp000434535/sp000763055/sp002232035/sp003436275/sp003437035/sp003438495/sp003439125/sp003458415/sp003459245/sp003459505/sp003462685/sp003465825/sp003466125/sp003469185/sp003469205/sp003470665/sp003471585/sp003487125/sp004554255/sp900540895/sp900541015/sp900541025…	15e05255b2aa8ee3524ca61eb207bb18
1	Bacteria	Firmicutes_A	Clostridia	Clostridiales	Clostridiaceae	Clostridium_P	Clostridium_P perfringens.4	30443040dd4a72ac62d5ed43fb7774e4
4	Bacteria	Firmicutes_A	Clostridia	TANB77	CAG-508	UMGS1994	UMGS1994 sp.15.2	3e1062eb5df400fd6ed70b80ab17e14a
4	Bacteria	Firmicutes_A	Clostridia	TANB77	CAG-508	UMGS1994	UMGS1994 sp.35.1	d8327bb2c17840d4c72620f3ad02f2cf
1	Bacteria	Firmicutes_A	Clostridia	Oscillospirales	Butyricicoccaceae	Agathobaculum	Agathobaculum sp003481705	5f0a87fd94e5eab13b32c351d9ccc59d
2	Bacteria	Firmicutes	Clostridia	Lachnospirales	Lachnospiraceae	Dorea	formicigenerans.1	f7e486f3db64da64b32f52baee0e32d4
4	Bacteria	Firmicutes_A	Clostridia	Oscillospirales	Ruminococcaceae	Ruminococcus_D	Ruminococcus_D bicirculans.2	a5ec531682184cfe7512196a43762ee8
1	Bacteria	Proteobacteria	Gammaproteobacteria	Enterobacterales	Enterobacteriaceae	Klebsiella	variicola.4	984e7be536e06e26470e10fc440b81d4
4	Bacteria	Firmicutes_A	Clostridia	Oscillospirales	Ruminococcaceae	Ruminococcus_D	Ruminococcus_D bicirculans.3	e9398bc0ad9626bc4742c93fd0363bac
1	Bacteria	Actinobacteriota	Actinomycetia	Actinomycetales	Actinomycetaceae	Pauljensenia	Pauljensenia turicensis.1	754a3badaa63b5de2d33c990b5a3fd74
4	Bacteria	Firmicutes_A	Clostridia	Lachnospirales	Lachnospiraceae	Blautia_A	Blautia_A massiliensis/schinkii/sp003474435/sp900066205/sp900066335.3	7d806d10c79c4a8941bfb2088da6a46c
2	Bacteria	Firmicutes_A	Clostridia	Lachnospirales	Lachnospiraceae	Clostridium_Q	Clostridium_Q sp.2	235ebe45963db763962a08835fcb9b32
1	Bacteria	Patescibacteria	Gracilibacteria	Absconditabacteriales (SR1)	Absconditabacteriales (SR1)	Absconditabacteriales (SR1)	Absconditabacteriales (SR1)	ba7bfa863a9cb583232946ea70eeacec
1	Bacteria	Actinobacteriota	Actinomycetia	Actinomycetales	Dermabacteraceae	Dermabacter	Dermabacter sp.	e643b272c075b5ebb6c67ff3d6d27d6f
1	Bacteria	Firmicutes	Clostridia	Lachnospirales	Lachnospiraceae	[Ruminococcus] torques group	[Ruminococcus] torques group.4	1b601a7277c04360b75853a8888913cb
4	Bacteria	Firmicutes_A	Clostridia	Lachnospirales	Lachnospiraceae	Family_Lachnospiraceae	Family_Lachnospiraceae10	29fc1e11d7f813aa68e3c789b3fc1a20
2	Bacteria	Firmicutes	Clostridia	Lachnospirales	Lachnospiraceae	Lachnospiraceae	Lachnospiraceae.7	1276c9f13155af9a88d9fd0a1bd2be32
1	Bacteria	Bacteroidota	Bacteroidia	Bacteroidales	Bacteroidaceae	Bacteroides	uniformis.4	994472be2dd49d8b53c897e31a593acf
4	Bacteria	Proteobacteria	Gammaproteobacteria	Burkholderiales	Burkholderiaceae	Parasutterella	Parasutterella excrementihominis/sp000980495.3	0eebf22536faa70d10968eb4972b2736
1	Bacteria	Bacteroidota	Bacteroidia	Bacteroidales	Bacteroidaceae	Bacteroides	vulgatus.8	32e97e7f149b44032907317b4abeb744
2	Bacteria	Actinobacteriota	Actinobacteria	Bifidobacteriales	Bifidobacteriaceae	Bifidobacterium	catenulatum.5	f0b4343fafca86c2396d619925d38de6
4	Bacteria	Firmicutes	Bacilli	Erysipelotrichales	Erysipelatoclostridiaceae	Erysipelatoclostridium	Erysipelatoclostridium sp.2	84d3aa3cef3eefd518d6d396b065a951
2	Bacteria	Firmicutes	Clostridia	Lachnospirales	Lachnospiraceae	[Ruminococcus] gnavus group	[Ruminococcus] gnavus group.12	11902be998c8092e98cbe98af2f648af
1	Bacteria	Firmicutes	Bacilli	Erysipelotrichales	Erysipelotrichaceae	Faecalitalea	cylindroides	5db9f56d906509dfb2dfe9e1da3eedc4
1	Bacteria	Firmicutes_A	Clostridia	Clostridiales	Clostridiaceae	Clostridium_P	Clostridium_P perfringens.5	36dd9b3faf304fa5c32684d4e37c62ea
1	Bacteria	Firmicutes	Clostridia	Oscillospirales	Ruminococcaceae	Faecalibacterium	prausnitzii.16	b9e12769306801a228febd5f81f76649
4	Bacteria	Firmicutes	Clostridia	Christensenellales	Christensenellaceae	Christensenellaceae R-7 group	Christensenellaceae R-7 group.6	1fd79c0a808de8700128f1f45f697dd4
1	Bacteria	Proteobacteria	Gammaproteobacteria	Enterobacterales	Enterobacteriaceae	Citrobacter	freundii.2	fa4e273bb595a9170d682e6336e8f6a6
1	Bacteria	Firmicutes_A	Clostridia	Oscillospirales	Acutalibacteraceae	Ruminococcus_E	Ruminococcus_E bromii/bromii_B/sp900765785.1	0568650ee641844976aae8a1a57dee5a
1	Bacteria	Proteobacteria	Gammaproteobacteria	Enterobacterales	Enterobacteriaceae	Raoultella	planticola.5	3d711bcb93f1db3385b874a890ea3fb2
4	Bacteria	Firmicutes	Clostridia	Oscillospirales	Ruminococcaceae	Fournierella	Fournierella	310023723aab4696cdb707dc6bb4d94a
1	Bacteria	Proteobacteria	Gammaproteobacteria	Burkholderiales	Alcaligenaceae	Achromobacter	Achromobacter	773fbaae4099fb183f2a32822b2c9a14
1	Bacteria	Firmicutes	Clostridia	Lachnospirales	Lachnospiraceae	Blautia	Blautia.16	19cf64e1595e18862ccf9d259fea7ccc
1	Bacteria	Bacteroidota	Bacteroidia	Bacteroidales	Bacteroidaceae	Bacteroides	fragilis.9	62089f29f94506097de7102816eff03d
1	Bacteria	Firmicutes_A	Clostridia	Clostridiales	Clostridiaceae	Clostridium_P	Clostridium_P perfringens.6	46512de1fcaef4629a167b3b53abbd48
1	Bacteria	Actinobacteriota	Actinomycetia	Actinomycetales	Actinomycetaceae	Actinotignum	Actinotignum sanguinis/schaalii/schaalii_A	94f8fc275662699a5731ea857d0fb98c
2	Bacteria	Firmicutes	Clostridia	Lachnospirales	Lachnospiraceae	Blautia	Blautia.17	991221e20a9c555a4b2b1874377ecf87
1	Bacteria	Proteobacteria	Gammaproteobacteria	Enterobacterales	Enterobacteriaceae	Klebsiella	variicola.5	077d45c6b7641fc08e649fac13b62a9d
1	Bacteria	Firmicutes	Bacilli	Lactobacillales	Streptococcaceae	Streptococcus	Streptococcus.8	98c60003caac4798b6e9a0da3102d2dd
1	Bacteria	Proteobacteria	Gammaproteobacteria	Xanthomonadales	Xanthomonadaceae	Stenotrophomonas	maltophilia.3	b2f76d128bfa41c5072fe922ba752a24
1	Bacteria	Firmicutes	Clostridia	Oscillospirales	Ruminococcaceae	Faecalibacterium	prausnitzii.17	efedda310cedfc0f81c75bf3c78cc314
1	Bacteria	Firmicutes	Negativicutes	Veillonellales-Selenomonadales	Veillonellaceae	Veillonella	ratti.9	b780356daa647f1f0be1a101e901c2c1
4	Bacteria	Firmicutes	Clostridia	Oscillospirales	UCG-010	UCG-010	UCG-010.3	fe4d4398c63ff02aeae1eece4c3006e4
1	Bacteria	Actinobacteriota	Actinobacteria	Bifidobacteriales	Bifidobacteriaceae	Bifidobacterium	longum.14	d894ad67cfecac6a772cd3b79d16f930
2	Bacteria	Firmicutes	Clostridia	Lachnospirales	Lachnospiraceae	Anaerostipes	hadrus.10	23fe1fd298da527897ca9e04a23c5511
1	Bacteria	Actinobacteriota	Actinobacteria	Micrococcales	Micrococcaceae	Rothia	mucilaginosa.4	173b8383238dc87920b640dfd06347b3
1	Bacteria	Proteobacteria	Gammaproteobacteria	Enterobacterales	Enterobacteriaceae	Citrobacter	werkmanii	0a809120745a8dacbc47531143b28401
1	Bacteria	Actinobacteriota	Coriobacteriia	Coriobacteriales	Coriobacteriaceae	Collinsella	Collinsella aerofaciens/aerofaciens_A/aerofaciens_E/aerofaciens_F/aerofaciens_G/aerofaciens_H/aerofaciens_J/aerofaciens_L/aerofaciens_N/sp000434535/sp000763055/sp002232035/sp003436275/sp003437035/sp003438495/sp003439125/sp003458415/sp003459245/sp003459505/sp003462685/sp003465825/sp003466125/sp003469185/sp003469205/sp003470665/sp003471585/sp003487125/sp004554255/sp900540895/sp900541015/sp900541025…	14983d98ef774aebf5e289de364ddf5c
1	Bacteria	Actinobacteriota	Actinomycetia	Actinomycetales	Actinomycetaceae	Pauljensenia	Pauljensenia odontolytica/odontolytica_A/odontolytica_B/odontolytica_C/sp000185285/sp000411415/sp000466265/sp001064145/sp001072465/sp001838165.5	5225764c4ea4caf3af9db6b8e7e71018
4	Bacteria	Bacteroidota	Bacteroidia	Bacteroidales	Bacteroidaceae	Bacteroides	vulgatus.9	866ea1cc638e4ceb9195a8a6a1869754
4	Bacteria	Firmicutes_A	Clostridia	Oscillospirales	Acutalibacteraceae	Eubacterium_R	Eubacterium_R sp.2	70af97e6ea2b3a7e5611507a076a7d65
4	Bacteria	Firmicutes_A	Clostridia	TANB77	CAG-508	UMGS1994	UMGS1994 sp.7	747a284c95e1af0ec02d6582f6565774
1	Bacteria	Firmicutes_A	Clostridia	Lachnospirales	Lachnospiraceae	Family_Lachnospiraceae	Family_Lachnospiraceae10.1	d9ba20058184522e2c24d0fd93092aa4
1	Bacteria	Firmicutes_A	Clostridia	Clostridiales	Clostridiaceae	Clostridium_P	Clostridium_P sp.6	3b27d3289f5213e632770c74e7a29d92
1	Bacteria	Firmicutes	Bacilli	Erysipelotrichales	Erysipelatoclostridiaceae	Erysipelatoclostridium	ramosum.5	151beba0ff58b3c415c7345bb7637354
1	Bacteria	Verrucomicrobiota	Verrucomicrobiae	Verrucomicrobiales	Akkermansiaceae	Akkermansia	Akkermansia.4	cc7bb84fe36f32ec1c09e2ef279cb0e0
1	Bacteria	Firmicutes_A	Clostridia	Oscillospirales	Ruminococcaceae	Ruminococcus	Ruminococcus sp.3.1	a1ee896cadcab3c8f3a007d9d5593c05
1	Bacteria	Proteobacteria	Gammaproteobacteria	Enterobacterales	Enterobacteriaceae	Escherichia-Shigella	boydii.1	58d18790401acc086379253f6f079d08
1	Bacteria	Firmicutes	Negativicutes	Veillonellales-Selenomonadales	Veillonellaceae	Veillonella	parvula.12	aa15ec5479cde6d5381cbc99a0f6a59e
1	Bacteria	Firmicutes	Bacilli	Staphylococcales	Staphylococcaceae	Staphylococcus	lugdunensis.2	eebf8f1ec819363293b7133f741df6a2
1	Bacteria	Firmicutes	Clostridia	Oscillospirales	Ruminococcaceae	Subdoligranulum	Subdoligranulum.5	07a4ebc17457d604828143eb89402eec
1	Bacteria	Firmicutes	Clostridia	Lachnospirales	Lachnospiraceae	Lachnospiraceae NK4A136 group	Lachnospiraceae NK4A136 group.5	7a4b03d408be56f063ae11449f3044a0
1	Bacteria	Proteobacteria	Gammaproteobacteria	Enterobacterales	Enterobacteriaceae	Klebsiella	oxytoca.3	3ae33711896cb5408c721d273d0f39e8
1	Bacteria	Firmicutes	Clostridia	Lachnospirales	Lachnospiraceae	Lachnoclostridium	Lachnoclostridium.10	02b3f4d43cd5d9ef65f723f972c82df4
4	Bacteria	Firmicutes	Clostridia	Oscillospirales	Ruminococcaceae	Faecalibacterium	Faecalibacterium.7	6f275e1c6e11493bfc51c19196ecdedf
1	Bacteria	Bacteroidota	Bacteroidia	Bacteroidales	Dysgonomonadaceae	Dysgonomonas	Dysgonomonas mossii/sp900079735.1	c84768dcfa6ed10fa731b9a12df602fd
1	Bacteria	Proteobacteria	Gammaproteobacteria	Enterobacterales	Erwiniaceae	Pantoea	septica	c98d5ece155377df87c43ce792bcaa10
4	Bacteria	Firmicutes_A	Clostridia	Oscillospirales	Acutalibacteraceae	UBA1417	UBA1417 sp003531055	3aef8bb7f47464bd8c11e5692ab3975f
1	Bacteria	Firmicutes	Clostridia	Oscillospirales	Ruminococcaceae	Subdoligranulum	Subdoligranulum.6	bb4d35e5f52dc00b292c371cbdcd8644
4	Bacteria	Firmicutes	Bacilli	Lactobacillales	Streptococcaceae	Streptococcus	parasanguinis.5	13785f0aa34992209c67c3caeebbd429
2	Bacteria	Firmicutes_A	Clostridia	Lachnospirales	Lachnospiraceae	Sellimonas	Sellimonas sp.	afe16d71cb885aac6948a433bf7bf246
1	Bacteria	Actinobacteriota	Coriobacteriia	Coriobacteriales	Atopobiaceae	Coriobacteriaceae UCG-002	Coriobacteriaceae UCG-002	878f9955221df08bb9ed2c3a60552235
1	Bacteria	Proteobacteria	Gammaproteobacteria	Enterobacterales	Enterobacteriaceae	Escherichia-Shigella	Escherichia-Shigella.11	1cfd3c2ead2adb94901931cc4f78cd42
4	Bacteria	Firmicutes_A	Clostridia	Oscillospirales	Acutalibacteraceae	UMGS1071	UMGS1071 sp900548305	b1f914aca311f8af324b2eda493cda68
1	Bacteria	Firmicutes_C	Negativicutes	Acidaminococcales	Acidaminococcaceae	Phascolarctobacterium_A	Phascolarctobacterium_A sp900544885/succinatutens.4	079dbd6ae6110a2b783348222ba4b048
1	Bacteria	Firmicutes	Bacilli	Staphylococcales	Staphylococcaceae	Staphylococcus	aureus.3	c287290f03f9b3579e7a982bc20e5387
1	Bacteria	Firmicutes	Bacilli	Lactobacillales	Enterococcaceae	Family_Enterococcaceae	Family_Enterococcaceae.19	f63a26fda6b5f601ef76ee013edfa647
1	Bacteria	Firmicutes_A	Clostridia	Clostridiales	Clostridiaceae	Clostridium_P	Clostridium_P sp.7	c94a6189b216706f4ce665ffaabd83f4
1	Bacteria	Bacteroidota	Bacteroidia	Bacteroidales	Bacteroidaceae	Prevotella	Prevotella timonensis_A.1	02e29495d81c4a3709bcb88e6561db63
1	Bacteria	Firmicutes	Clostridia	Lachnospirales	Lachnospiraceae	[Eubacterium] hallii group	hallii.3	25195424adf6638b685ee5263cfc3987
1	Bacteria	Firmicutes	Bacilli	Staphylococcales	Staphylococcaceae	Staphylococcus	caprae.6	99c80a4e5460b784245cd20afd10af45
1	Bacteria	Firmicutes	Bacilli	Lactobacillales	Streptococcaceae	Streptococcus	anginosus.3	8deb6aa116ae70804d1f36c20c18c38f
1	Bacteria	Firmicutes	Clostridia	Lachnospirales	Lachnospiraceae	Agathobacter	Agathobacter.10	1a0d74c3e4e4a512ef17fae8c1272b38
1	Bacteria	Actinobacteriota	Actinomycetia	Actinomycetales	Actinomycetaceae	Varibaculum	Varibaculum cambriense/cambriense_A/cambriense_B/massiliense	7606ca7f81c22216f5b0f3cd1b789e80
2	Bacteria	Firmicutes	Clostridia	Lachnospirales	Lachnospiraceae	Lachnoclostridium	Lachnoclostridium.11	169a87692b19db5f13f986e8c33f673d
1	Bacteria	Firmicutes	Clostridia	Lachnospirales	Lachnospiraceae	Blautia	Blautia.18	329a82da78adad5faab8af31adc1b8e0
2	Bacteria	Proteobacteria	Gammaproteobacteria	Enterobacterales	Enterobacteriaceae	Citrobacter	amalonaticus.1	d6c964d7a1d76f1547e809eb9b3b8dd6
1	Bacteria	Firmicutes	Bacilli	Lactobacillales	Streptococcaceae	Streptococcus	salivarius.24	d58961035f60a0c728896a547388a61f
1	Bacteria	Firmicutes	Bacilli	Staphylococcales	Staphylococcaceae	Staphylococcus	Staphylococcus.17	f60fd8b00d26b09f94596034178bef0f
4	Bacteria	Firmicutes	Clostridia	Lachnospirales	Lachnospiraceae	Blautia	hydrogenotrophica.1	2365e4e3e60d7f0d9677a8bb43eda3d8
1	Bacteria	Firmicutes_A	Clostridia	Tissierellales	Peptoniphilaceae	Finegoldia	Finegoldia magna/magna_F/magna_H.2	bb775e11c34f2753e6a3eb38b036c146
4	Bacteria	Actinobacteriota	Coriobacteriia	Coriobacteriales	Coriobacteriales	Coriobacteriales	Coriobacteriales	b59a0c9ab4bde92f12b437e88febec96
1	Bacteria	Firmicutes_A	Clostridia	Lachnospirales	Lachnospiraceae	Dorea_A	Dorea_A longicatena/longicatena_B	57344b8ef1ac3a8d67096129241c4a2f
2	Bacteria	Firmicutes	Bacilli	Erysipelotrichales	Erysipelatoclostridiaceae	Faecalibacillus	Faecalibacillus faecis/intestinalis/sp900762515.4	d2dd600ce88a838333696bfaf1319084
4	Bacteria	Firmicutes_A	Clostridia	Lachnospirales	Lachnospiraceae	Schaedlerella	Schaedlerella sp900066545	858239ae0480d03a1c4022da23ebc160
4	Bacteria	Firmicutes_A	Clostridia	Lachnospirales	Lachnospiraceae	Eubacterium_G	Eubacterium_G sp000432355/ventriosum.1	19c8480756b9044c5d1cbe2a9f7ef60d
2	Bacteria	Actinobacteriota	Actinobacteria	Bifidobacteriales	Bifidobacteriaceae	Bifidobacterium	longum.15	ee558d4a320c6e216fdbaa73ec0588e8
1	Bacteria	Firmicutes	Bacilli	Lactobacillales	Streptococcaceae	Streptococcus	Streptococcus.9	282a8f19f0261270b9acc75429dedc61
4	Bacteria	Actinobacteriota	Coriobacteriia	Coriobacteriales	Eggerthellaceae	Eggerthellaceae	Eggerthellaceae.1	547de17c085525b46e48090c58c4292f
1	Bacteria	Proteobacteria	Gammaproteobacteria	Enterobacterales	Enterobacteriaceae	Enterobacter	Enterobacter.4	1cd3a7a0245def6afd2febd47683cb1d
1	Bacteria	Patescibacteria	Saccharimonadia	Saccharimonadales	Saccharimonadales	Saccharimonadales	Saccharimonadales.4	6818a424bb3f45b910ba08f81330686f
1	Bacteria	Bacteroidota	Bacteroidia	Bacteroidales	Bacteroidaceae	Bacteroides	Bacteroides stercoris.2	b64c567984dc148351b29bece6176acb
1	Bacteria	Bacteroidota	Bacteroidia	Bacteroidales	Tannerellaceae	Parabacteroides	Parabacteroides johnsonii.1	160fe1c30fce2666a569aa3cbc49bc43
2	Bacteria	Firmicutes_A	Clostridia	Lachnospirales	Lachnospiraceae	Enterocloster	Enterocloster sp.5	687115c117781342a7475d4be3d20a4d
1	Bacteria	Proteobacteria	Gammaproteobacteria	Enterobacterales	Enterobacteriaceae	Klebsiella	quasipneumoniae.6	fe1dec4c85d89c1a467bb0cc0e9b9464
1	Bacteria	Actinobacteriota	Actinomycetia	Actinomycetales	Bifidobacteriaceae	Bifidobacterium	Bifidobacterium dentium/moukalabense.5	cc9e3d32441e809f6bd57e6cc2be23a8
2	Bacteria	Actinobacteriota	Actinomycetia	Actinomycetales	Actinomycetaceae	Pauljensenia	Pauljensenia odontolytica/odontolytica_A/odontolytica_B/odontolytica_C/sp000185285/sp000411415/sp000466265/sp001064145/sp001072465/sp001838165.6	4134eac76594c1ea85b6438e050deaf9
1	Bacteria	Firmicutes	Clostridia	Peptostreptococcales-Tissierellales	Anaerovoracaceae	S5-A14a	S5-A14a	4f41a950506a6750bd6e0ee3c3329720
1	Bacteria	Firmicutes	Clostridia	Christensenellales	Christensenellaceae	Christensenellaceae R-7 group	Christensenellaceae R-7 group.7	580ba44d3f597b7f91d03f92c8a38bec
4	Bacteria	Actinobacteriota	Actinomycetia	Actinomycetales	Actinomycetaceae	Pauljensenia	Pauljensenia turicensis.2	a2390e05692b02e894ac9f8fa5823a01
1	Bacteria	Bacteroidota	Bacteroidia	Bacteroidales	Bacteroidaceae	Bacteroides	dorei.7	31fea6c00b138f3b2de5b65c4747fd17
4	Bacteria	Firmicutes	Clostridia	Oscillospirales	UCG-010	UCG-010	UCG-010.4	4a5a57fbc4e868475b2ff4d45e8d1642
1	Bacteria	Firmicutes	Clostridia	Clostridiales	Clostridiaceae	Clostridium sensu stricto 1	Clostridium sensu stricto 1.8	39d8cc3fe95fb9f40ee01e08cb55b1a9
1	Bacteria	Verrucomicrobiota	Verrucomicrobiae	Verrucomicrobiales	Akkermansiaceae	Akkermansia	muciniphila.3	091192380a63a004a916e788f4a24cc1
4	Bacteria	Firmicutes_A	Clostridia	Lachnospirales	Lachnospiraceae	Eisenbergiella	Eisenbergiella massiliensis	902d8f67d3ef7fec32c8b3b3c1ad0ba3
1	Bacteria	Proteobacteria	Gammaproteobacteria	Enterobacterales	Enterobacteriaceae	Escherichia-Shigella	coli.9	6d63cc2b46f07c2c6c5799c10bd938c2
4	Bacteria	Firmicutes	Negativicutes	Veillonellales-Selenomonadales	Veillonellaceae	Veillonella	Veillonella.12	d59eb92ad1cea014dba32c409a075aff
1	Bacteria	Bacteroidota	Bacteroidia	Bacteroidales	Tannerellaceae	Parabacteroides	Parabacteroides sp.30.2	4ed3c3eb78421b68f1a1c44c1d373a8a
1	Bacteria	Actinobacteriota	Actinomycetia	Actinomycetales	Bifidobacteriaceae	Bifidobacterium	Bifidobacterium dentium/moukalabense.6	4e201adc084aae935d3a4b010498b81e
2	Bacteria	Firmicutes_A	Clostridia	Lachnospirales	Lachnospiraceae	Blautia_A	Blautia_A massiliensis/schinkii/sp003474435/sp900066205/sp900066335.4	461ce69c9fa9ec9fb34064e45a79af66
1	Bacteria	Firmicutes	Bacilli	Lactobacillales	Streptococcaceae	Streptococcus	parasanguinis.6	e14429c321f16577e04f08e67db71f7f
1	Bacteria	Firmicutes	Bacilli	Staphylococcales	Staphylococcaceae	Staphylococcus	epidermidis.2	908e9b387f6b9ce7d3f794e658fba37e
2	Bacteria	Verrucomicrobiota	Verrucomicrobiae	Verrucomicrobiales	Akkermansiaceae	Akkermansia	muciniphila.4	7a8dda16b4ae6463d677ca2164963b6f
1	Bacteria	Firmicutes	Negativicutes	Veillonellales-Selenomonadales	Veillonellaceae	Megasphaera	micronuciformis.5	f74a1eb7df0bfe4a588b50ef48b50da4
1	Bacteria	Proteobacteria	Gammaproteobacteria	Enterobacterales	Enterobacteriaceae	Escherichia-Shigella	Escherichia-Shigella.12	84314d56b29c9042fbf67d76cd72972b
4	Bacteria	Firmicutes	Clostridia	Lachnospirales	Lachnospiraceae	Roseburia	hominis.1	3a893286e7a8c6965a9be85b7ec43c60
1	Bacteria	Firmicutes	Bacilli	Lactobacillales	Streptococcaceae	Streptococcus	oralis.4	620dcde82bf1e131caa8b948137d24cd
1	Bacteria	Firmicutes_C	Negativicutes	Veillonellales	Megasphaeraceae	Megasphaera	Megasphaera sp001546855.2	1fbb6683c9c6aaa6ce2687a4ad76c639
1	Bacteria	Firmicutes	Bacilli	Lactobacillales	Lactobacillaceae	Ligilactobacillus	Ligilactobacillus ruminis	c553e2edffea3d988cc86b415ef68b33
1	Bacteria	Firmicutes	Clostridia	Oscillospirales	Ruminococcaceae	Faecalibacterium	Faecalibacterium.8	fea8b171a46dd79de56527916059d22b
1	Bacteria	Firmicutes	Bacilli	Staphylococcales	Staphylococcaceae	Staphylococcus	Staphylococcus.18	a119f1732c4ce9db81861cf0f88c1578
1	Bacteria	Firmicutes	Clostridia	Clostridia UCG-014	Clostridia UCG-014	Clostridia UCG-014	Clostridia UCG-014.4	d523640ac1638a88a31b97cd6833711b
4	Bacteria	Firmicutes_A	Clostridia	TANB77	CAG-508	UMGS1994	UMGS1994 sp.30	7b9cafe60e45bfc1f84712279045bdc0
4	Bacteria	Firmicutes_A	Clostridia	Oscillospirales	Oscillospiraceae	CAG-83	CAG-83 sp.3	8dc998690c208848dc6a884219d1d78b
1	Bacteria	Firmicutes	Bacilli	Lactobacillales	Streptococcaceae	Streptococcus	oralis.5	a46de844bf755637b035d592967a1682
1	Bacteria	Proteobacteria	Gammaproteobacteria	Enterobacterales	Enterobacteriaceae	Citrobacter	koseri.3	2e60d98fba9c68f58e7051d47b5547e0
1	Bacteria	Proteobacteria	Gammaproteobacteria	Enterobacterales	Enterobacteriaceae	Enterobacteriaceae	Enterobacteriaceae.3	bd2a41bdb797650b6551b36b3056c99b
1	Bacteria	Firmicutes	Bacilli	Lactobacillales	Streptococcaceae	Streptococcus	oralis.6	36a3bb8b6f19f1bd8884611327e2fddd
1	Bacteria	Firmicutes	Bacilli	Erysipelotrichales	Erysipelatoclostridiaceae	Erysipelatoclostridium	ramosum.6	4340735d6b2e90f77676e35e5d8cc854
1	Bacteria	Bacteroidota	Bacteroidia	Bacteroidales	Bacteroidaceae	Prevotella	Prevotella timonensis_A.2	5fb8647f938fd8b676f3cbfc2d7ee27e
1	Bacteria	Firmicutes	Negativicutes	Veillonellales-Selenomonadales	Veillonellaceae	Veillonella	atypica.13	1e44e0f143bc14293989023d6eccb16d
1	Bacteria	Firmicutes_C	Negativicutes	Veillonellales	Megasphaeraceae	Megasphaera	Megasphaera elsdenii/sp000417505.3	0cfba7a5418442a4d06821babcd47b08
1	Bacteria	Firmicutes	Clostridia	Peptostreptococcales-Tissierellales	Family XI	Peptoniphilus	lacrimalis	7e64529549a54fc68cfc5e832c2f370a
4	Bacteria	Bacteroidota	Bacteroidia	Bacteroidales	Bacteroidaceae	Bacteroides	Bacteroides	a6d7fddb79dfed55104e2cbf7677531a
4	Bacteria	Firmicutes	Bacilli	Erysipelotrichales	Erysipelotrichaceae	Dielma	fastidiosa	4ec189ed638989a4944b01ddff111968
1	Bacteria	Firmicutes_C	Negativicutes	Veillonellales	Dialisteraceae	Dialister	Dialister succinatiphilus	c8aca7b09b949015e4b3fac4fdbfc5ae
1	Bacteria	Firmicutes	Clostridia	Peptostreptococcales-Tissierellales	Family XI	Peptoniphilus	grossensis	4f8285827d64ed44a3a48f09c8deb2fb
4	Bacteria	Firmicutes_A	Clostridia	Oscillospirales	Ruminococcaceae	Ruminiclostridium_E	Ruminiclostridium_E siraeum	4a1547af0bbae2aff8f3222d2fba2102
4	Bacteria	Bacteroidota	Bacteroidia	Bacteroidales	Bacteroidaceae	Paraprevotella	Paraprevotella faecium/sp900760455	fb7a1c0b3625f00ee42dbfcbaa001f12
1	Bacteria	Firmicutes	Clostridia	Lachnospirales	Lachnospiraceae	[Ruminococcus] torques group	[Ruminococcus] torques group.5	7fae89f811d141623cd84c4c7f4c2d27
2	Bacteria	Firmicutes	Negativicutes	Veillonellales-Selenomonadales	Veillonellaceae	Veillonella	Veillonella.13	fe7bf751391c0c2a03833a00c252d3f7
1	Bacteria	Proteobacteria	Gammaproteobacteria	Xanthomonadales	Xanthomonadaceae	Stenotrophomonas	maltophilia.4	86892b48f1290a2879e1dc8250f9c8c5
1	Bacteria	Firmicutes_A	Clostridia	Lachnospirales	Lachnospiraceae	Faecalimonas	Faecalimonas phoceensis.1	9a06936b9d299933be653b3b82fcc6ab
4	Bacteria	Firmicutes_A	Clostridia	Oscillospirales	Butyricicoccaceae	Agathobaculum	Agathobaculum sp..2	62c336937d9c98f93521f014e1f21a63
2	Bacteria	Bacteroidota	Bacteroidia	Bacteroidales	Prevotellaceae	Prevotella_9	Prevotella_9.9	da08cefbe17c776cf78b0634a8377efa
4	Bacteria	Firmicutes	Bacilli	Erysipelotrichales	Erysipelatoclostridiaceae	Faecalibacillus	Faecalibacillus faecis/intestinalis/sp900762515.5	cd33343b747cb20a2c7f908be741c159
1	Bacteria	Firmicutes	Bacilli	Erysipelotrichales	Erysipelotrichaceae	Clostridium_AQ	Clostridium_AQ innocuum/sp900755895.4	c3174dece042bb9dc7b54dcde91c92ed
1	Bacteria	Actinobacteriota	Actinobacteria	Bifidobacteriales	Bifidobacteriaceae	Bifidobacterium	adolescentis.1	de437c9cd02f949d11c3fdd67a15aecd
4	Bacteria	Firmicutes_A	Clostridia	Oscillospirales	Ruminococcaceae	Anaerotruncus	Anaerotruncus colihominis/colihominis_A	0e7d3e385205938a3696d376c04a870a
1	Bacteria	Firmicutes	Bacilli	Erysipelotrichales	Erysipelatoclostridiaceae	Erysipelatoclostridium	ramosum.7	ccad4d008acb7cb43569c7bc77ce20b6
1	Bacteria	Firmicutes	Clostridia	Lachnospirales	Lachnospiraceae	Agathobacter	Agathobacter.11	733d2cb3347e3b2c128e3af4a3d69348
1	Bacteria	Bacteroidota	Bacteroidia	Bacteroidales	Bacteroidaceae	Bacteroides	thetaiotaomicron.2	e8088d02defc44d1824d55736d9d07bc
1	Bacteria	Firmicutes	Clostridia	Oscillospirales	Ruminococcaceae	Incertae Sedis	Incertae Sedis.3	374dacd6242744cd098fa55bf3e050ee
4	Bacteria	Firmicutes_A	Clostridia	Lachnospirales	Lachnospiraceae	Eubacterium_G	Eubacterium_G sp000432355/ventriosum.2	582fae36f33acd1efdcaf7cacf00ef0a
4	Bacteria	Firmicutes_A	Clostridia	TANB77	CAG-508	UMGS1994	UMGS1994 sp.31	5c8f872fa1f2a457fc63f385c25785db
2	Bacteria	Firmicutes	Negativicutes	Veillonellales-Selenomonadales	Veillonellaceae	Veillonella	ratti.10	4c918ec3b88a1ceb26576b8485f0abcf
4	Bacteria	Firmicutes_A	Clostridia	Oscillospirales	Acutalibacteraceae	Eubacterium_R	Eubacterium_R sp900539845	61d96a1395c98563bd419df4e71674cf
2	Bacteria	Firmicutes_A	Clostridia	Oscillospirales	Oscillospiraceae	Flavonifractor	Flavonifractor plautii/sp000508885.4	e061f2a3bc1cebf79fcf479a050ef39b
2	Bacteria	Actinobacteriota	Coriobacteriia	Coriobacteriales	Eggerthellaceae	Eggerthella	Eggerthella sp..1	88c9cb7c7ec8be1444e152d4b03209db
1	Bacteria	Firmicutes	Negativicutes	Veillonellales-Selenomonadales	Veillonellaceae	Veillonella	ratti.11	79c2adaa28bce509bd1864acf962ad60
1	Bacteria	Proteobacteria	Gammaproteobacteria	Enterobacterales	Enterobacteriaceae	Klebsiella	pneumoniae.5	a9d3f0bd5ca203b5354a332eca91a33c
1	Bacteria	Proteobacteria	Alphaproteobacteria	Rhizobiales	Rhizobiaceae	Ochrobactrum	pseudogrignonense	e2bbe033fdd375d26d3dc70581efe7c0
1	Bacteria	Firmicutes_A	Clostridia	Clostridiales	Clostridiaceae	Clostridium	Clostridium cuniculi/saudiense.3	39aa4ec8b47b861885f12c4e4dc744f1
2	Bacteria	Firmicutes	Bacilli	Lactobacillales	Streptococcaceae	Streptococcus	thermophilus.3	2d7de1509fe91f34a7bb482698bf6de2
1	Bacteria	Firmicutes	Clostridia	Peptostreptococcales-Tissierellales	Family XI	Peptoniphilus	grossensis.1	438ab3e663054c9bfab16941bd6964c7
4	Bacteria	Firmicutes	Clostridia	Oscillospirales	Ruminococcaceae	Faecalibacterium	Faecalibacterium.9	b315dc4c090ef96938095a4cae8d05ac
4	Bacteria	Bacteroidota	Bacteroidia	Bacteroidales	Bacteroidaceae	Bacteroides	vulgatus.10	b8f980ec6ad0c86efb83bd1f64c3a252
1	Bacteria	Firmicutes	Bacilli	Lactobacillales	Streptococcaceae	Streptococcus	agalactiae	c3a3a503752209bc052b3995236b079f
1	Bacteria	Firmicutes	Negativicutes	Veillonellales-Selenomonadales	Veillonellaceae	Veillonella	dispar.2	7d4f9d994231eda289bdbc50426dda4e
2	Bacteria	Firmicutes	Bacilli	Lactobacillales	Lactobacillaceae	Lactiplantibacillus	Lactiplantibacillus fabifermentans/paraplantarum/pentosus/plantarum/plantarum_A/sp005404945	1799bb6fa3baa5becf58a1b7909fe4e0
2	Bacteria	Bacteroidota	Bacteroidia	Bacteroidales	Bacteroidaceae	Bacteroides	fragilis.10	47f3d645d96038371757074de1d8fb8d
1	Bacteria	Bacteroidota	Bacteroidia	Bacteroidales	UBA11471	UBA11471	UBA11471 sp.4.1	5f9fc8fb7ca24fcaf3f233ba767f63b8
4	Bacteria	Bacteroidota	Bacteroidia	Bacteroidales	Bacteroidaceae	Bacteroides	ovatus.11	208134d9710bcf4724a053b364b131ae
2	Bacteria	Firmicutes_A	Clostridia	Lachnospirales	Lachnospiraceae	Hungatella_A	Hungatella_A hathewayi_A/sp005845265.1	82c448c1808ec28bd3b550b0460519cb
4	Bacteria	Firmicutes	Clostridia	Oscillospirales	UCG-010	UCG-010	UCG-010.5	69e2c958aec2873fd485ae9b5ff748f3
1	Bacteria	Bacteroidota	Bacteroidia	Bacteroidales	Tannerellaceae	Parabacteroides	Parabacteroides sp.27	2a736f2c26b453d2ba46065a90fa891e
1	Bacteria	Firmicutes	Bacilli	Erysipelotrichales	Erysipelotrichaceae	Faecalitalea	cylindroides.1	7f986a23e7a0eba3b17d7e58018abcd3
1	Bacteria	Firmicutes	Negativicutes	Acidaminococcales	Acidaminococcaceae	Acidaminococcus	Acidaminococcus	7e764bcfc58744bb274bb4afb3e39c73
1	Bacteria	Actinobacteriota	Actinomycetia	Actinomycetales	Actinomycetaceae	Varibaculum	Varibaculum cambriense/cambriense_A/cambriense_B/massiliense.1	693e908ec87c7b80cc8dd99c964c369b
1	Bacteria	Firmicutes	Bacilli	Erysipelotrichales	Erysipelotrichaceae	Holdemanella	Holdemanella	14851b2dd8c31ab70cbae5e1822c59d8
1	Bacteria	Firmicutes	Bacilli	Lactobacillales	Streptococcaceae	Streptococcus	salivarius.25	9c8c4dd090af994534b367530e343ca7
1	Bacteria	Firmicutes	Clostridia	Lachnospirales	Lachnospiraceae	[Eubacterium] hallii group	[Eubacterium] hallii group.1	fa7198221339824aa48f34acb50a188e
1	Bacteria	Firmicutes	Bacilli	Lactobacillales	Streptococcaceae	Streptococcus	lutetiensis.4	f60786276f75311947e38d1a4cdb71dd
4	Bacteria	Firmicutes	Clostridia	Lachnospirales	Lachnospiraceae	Fusicatenibacter	Fusicatenibacter.6	9df251784dde31e05f02b2ee1029d71c
4	Bacteria	Firmicutes	Clostridia	Christensenellales	Christensenellaceae	Christensenellaceae R-7 group	Christensenellaceae R-7 group.8	f49914c885199c825b5e3d35d84e906f
2	Bacteria	Firmicutes	Clostridia	Lachnospirales	Lachnospiraceae	[Ruminococcus] gauvreauii group	[Ruminococcus] gauvreauii group.3	6401d2b5e25240e725fe8ddd48e4c590
1	Bacteria	Proteobacteria	Gammaproteobacteria	Enterobacterales	Enterobacteriaceae	Raoultella	ornithinolytica.1	97b90573b24c2124ba927c3f62bb8e08
4	Bacteria	Firmicutes	Clostridia	Lachnospirales	Lachnospiraceae	Blautia	obeum.5	8f6e2a91e20994c00566a5ff2b49506e
1	Bacteria	Bacteroidota	Bacteroidia	Bacteroidales	Prevotellaceae	Prevotella_9	Prevotella_9.10	d1c487b9af946781490180d9d5453adc
1	Bacteria	Firmicutes	Bacilli	Lactobacillales	Carnobacteriaceae	Carnobacterium	maltaromaticum	01353923e2e6219198b8d092099e0d9f
1	Bacteria	Firmicutes_A	Clostridia	Clostridiales	Clostridiaceae	Clostridium_P	Clostridium_P sp.8	508cba6a500cb5e360f0b6d488b6a3f8
1	Bacteria	Actinobacteriota	Actinobacteria	Bifidobacteriales	Bifidobacteriaceae	Bifidobacterium	bifidum.4	58dc58e9cdfde659a79816921ea421df
2	Bacteria	Actinobacteriota	Actinobacteria	Bifidobacteriales	Bifidobacteriaceae	Bifidobacterium	longum.16	e6b32ad91ea89b17f958102f079efc1f
2	Bacteria	Firmicutes_A	Clostridia	Lachnospirales	Lachnospiraceae	Hungatella	Hungatella effluvii	78c2b8e06a58a133919d9e5fd0cd2da1
4	Bacteria	Firmicutes_A	Clostridia	Oscillospirales	Ruminococcaceae	Ruminococcus_D	Ruminococcus_D bicirculans.4	eedfa9846d276457a5ce7afbed499f09
4	Bacteria	Firmicutes_A	Clostridia_A	Christensenellales	CAG-74	HGM11604	HGM11604 sp.4	f7035cbf3dd378172a24fb9ce26588b3
1	Bacteria	Firmicutes	Bacilli	Lactobacillales	Streptococcaceae	Streptococcus	gallolyticus.4	6a2292331e45abfbc8ac7047e1e3c92a
1	Bacteria	Actinobacteriota	Actinomycetia	Actinomycetales	Actinomycetaceae	Pauljensenia	Pauljensenia pyogenes_A/sp000308055.4	9807ec586912246d63fa99d8f3337fef
1	Bacteria	Firmicutes	Bacilli	Lactobacillales	Lactobacillaceae	Limosilactobacillus	Limosilactobacillus antri/frumenti/oris/panis/reuteri/reuteri_D/reuteri_E/sp014145435/sp014145545/sp014145615/sp900156885/vaginalis_A.2	ad727565ebd50e46616905ea3b9bbd2d
1	Bacteria	Firmicutes	Clostridia	Lachnospirales	Lachnospiraceae	Blautia	Blautia.19	649cbde488806ce5d18474b8b181e9c1
1	Bacteria	Firmicutes_A	Clostridia	Oscillospirales	Acutalibacteraceae	UBA1417	UBA1417 sp.	5e0673bde6e3a4692e3d9328e848137a
4	Bacteria	Firmicutes_A	Clostridia_A	Christensenellales	CAG-74	UBA11524	UBA11524 sp.3	386f486ad8374e0a0073cc40f5f7c306
1	Bacteria	Proteobacteria	Gammaproteobacteria	Enterobacterales	Enterobacteriaceae	Klebsiella	Klebsiella.4	5679bfcacfc25255f3acedc9bd2c8afd
1	Bacteria	Firmicutes	Bacilli	Lactobacillales	Lactobacillaceae	Limosilactobacillus	Limosilactobacillus fermentum.6	8817d7b86b6bb27418509483450b1460
1	Bacteria	Firmicutes	Bacilli	Lactobacillales	Streptococcaceae	Streptococcus	salivarius.26	bb15bdb607055d821e6abfb7dcf6a53e
1	Bacteria	Proteobacteria	Gammaproteobacteria	Enterobacterales	Pasteurellaceae	Haemophilus	parainfluenzae.5	ae8ff64cf5a37babe8905e10dad80b4b
2	Bacteria	Firmicutes	Bacilli	Erysipelotrichales	Erysipelatoclostridiaceae	Faecalibacillus	Faecalibacillus faecis/intestinalis/sp900762515.6	d731cdba0d09fd5c94844b1c22087c68
2	Bacteria	Firmicutes_A	Clostridia	Lachnospirales	Lachnospiraceae	Schaedlerella	Schaedlerella sp.2.2	aa95feae95b44a2d2634f890a44f2adb
1	Bacteria	Firmicutes	Bacilli	Lactobacillales	Streptococcaceae	Streptococcus	salivarius.27	d264e9bc6c8433766a6155af68d1245b
4	Bacteria	Firmicutes	Clostridia	Oscillospirales	Ethanoligenenaceae	Acetanaerobacterium	Acetanaerobacterium	b1a448dc7412d506e18461362944ecf8
1	Bacteria	Firmicutes	Negativicutes	Veillonellales-Selenomonadales	Veillonellaceae	Veillonella	parvula.13	331187ca554de081d132f36d65633d4a
1	Bacteria	Actinobacteriota	Actinobacteria	Corynebacteriales	Corynebacteriaceae	Lawsonella	clevelandensis.1	3b6ddd8d31929826068624d266a6796f
4	Bacteria	Firmicutes	Bacilli	Erysipelotrichales	Erysipelotrichaceae	Holdemania	Holdemania	9e853c417d84ab965afb5b7b73591048
4	Bacteria	Proteobacteria	Alphaproteobacteria	RF32	CAG-239	51-20	51-20 sp.2	2dbb2410d57cf07b9448d6dc0d5cf236
1	Bacteria	Firmicutes	Clostridia	Clostridiales	Clostridiaceae	Clostridium sensu stricto 1	perfringens.3	ebdac7a87fa71987a94832e02b23615f
1	Bacteria	Firmicutes	Bacilli	Lactobacillales	Lactobacillaceae	Lactobacillus	iners.1	bb48d4fe6403e7ecb4bc406617649cd8
1	Bacteria	Proteobacteria	Gammaproteobacteria	Enterobacterales	Enterobacteriaceae	Escherichia-Shigella	boydii.2	5dd5c24670d9bd195f5604d431b5824c
4	Bacteria	Firmicutes	Bacilli	Lactobacillales	Lactobacillaceae	Latilactobacillus	Latilactobacillus curvatus/sakei/sakei_A	9598d2588ce7fdb88b62b7ee13936b19
4	Bacteria	Bacteroidota	Bacteroidia	Bacteroidales	Tannerellaceae	Parabacteroides	merdae	4d6fe682a4dd9aad8decfab830a193e0
1	Bacteria	Firmicutes	Clostridia	Lachnospirales	Lachnospiraceae	Blautia	Blautia.20	38b5cde29e76155f37d9ebdb53534be1
1	Bacteria	Firmicutes	Clostridia	Peptostreptococcales-Tissierellales	Family XI	Peptoniphilus	urinimassiliensis	7e52fd8396316415efe855b14f17af0c
1	Bacteria	Proteobacteria	Gammaproteobacteria	Enterobacterales	Enterobacteriaceae	Serratia	Serratia marcescens/marcescens_B/marcescens_F/marcescens_I/marcescens_J/marcescens_K/nematodiphila/surfactantfaciens/ureilytica.2	c674d2e9bc0413d6b50a85c75bdcc5c0
1	Bacteria	Firmicutes	Clostridia	Peptostreptococcales-Tissierellales	Family XI	Anaerococcus	prevotii.2	39a688974ef42104059262c9fee17f2e
4	Bacteria	Firmicutes_A	Clostridia	Lachnospirales	Lachnospiraceae	Eisenbergiella	Eisenbergiella sp900066775	3adfcfa6caaacaa41dc7571330a74676
1	Bacteria	Proteobacteria	Gammaproteobacteria	Enterobacterales	Enterobacteriaceae	Raoultella	planticola.6	a6c435f96bd2e992682cc3e7040ec5b2
4	Bacteria	Firmicutes_A	Clostridia	Oscillospirales	Oscillospiraceae	Lawsonibacter	Lawsonibacter sp900066825/sp902363045	ffb3bf7b7c32855e8d622314660e1a37
4	Bacteria	Firmicutes_A	Clostridia	Lachnospirales	Lachnospiraceae	UBA7182	UBA7182 sp003480725	701a3b717e15f0c22b17a989e3fd807a
1	Bacteria	Firmicutes	Clostridia	Peptostreptococcales-Tissierellales	Peptostreptococcaceae	Peptoclostridium	Peptoclostridium	fa18371d7062793ea19a315790b69117
1	Bacteria	Proteobacteria	Gammaproteobacteria	Enterobacterales	Enterobacteriaceae	Klebsiella	Klebsiella.5	81b9f03d185fefa353a4ae3dcd66c161
4	Bacteria	Firmicutes_A	Clostridia	Lachnospirales	Lachnospiraceae	Lachnospira	Lachnospira eligens/eligens_A/sp003537285	1875d4e7a11ed24c92a865355693b86c
1	Bacteria	Actinobacteriota	Coriobacteriia	Coriobacteriales	Atopobiaceae	Olsenella	Olsenella	6f264405ae9f5fe90320f91a615cfcc3
2	Bacteria	Firmicutes_A	Clostridia	Lachnospirales	Lachnospiraceae	Faecalimonas	Faecalimonas umbilicata.6	d6bff94349f93df9c98368bfbc740ed0
4	Bacteria	Firmicutes	Bacilli	Staphylococcales	Staphylococcaceae	Staphylococcus	saprophyticus	8270ef16a97526023e95ac0236c92f78
1	Bacteria	Firmicutes	Clostridia	Lachnospirales	Lachnospiraceae	Tyzzerella	Tyzzerella.3	7882bd920d42a20070e6a8c855a735e7
1	Bacteria	Firmicutes	Negativicutes	Veillonellales-Selenomonadales	Veillonellaceae	Veillonella	atypica.14	82d965ee42e55da047a3e5a3daaa7357
1	Bacteria	Firmicutes	Bacilli	Lactobacillales	Streptococcaceae	Streptococcus	gallolyticus.5	6b63073b0ccc5720ef3f727c41824725
1	Bacteria	Proteobacteria	Gammaproteobacteria	Enterobacterales	Enterobacteriaceae	Klebsiella	pneumoniae.6	9113c31c648d797bdd28629f3b8d2095
1	Bacteria	Proteobacteria	Gammaproteobacteria	Enterobacterales	Enterobacteriaceae	Escherichia-Shigella	Escherichia-Shigella.13	419e61cef8a00ec23e560e47052c98ed
2	Bacteria	Firmicutes	Negativicutes	Veillonellales-Selenomonadales	Veillonellaceae	Megasphaera	micronuciformis.6	9be7cae2c0b1fa7c813f94794453de55
2	Bacteria	Firmicutes_A	Clostridia	Lachnospirales	Lachnospiraceae	Faecalimonas	Faecalimonas phoceensis.2	51d884cb2660dd8b33068678bad40357
1	Bacteria	Proteobacteria	Gammaproteobacteria	Enterobacterales	Enterobacteriaceae	Escherichia-Shigella	coli.10	691df5ef00365cc7d13b8430b4bbaca9
4	Bacteria	Firmicutes	Negativicutes	Veillonellales-Selenomonadales	Veillonellaceae	Veillonella	Veillonella.14	1cb79d5275187534b0c9403c523c210f
2	Bacteria	Firmicutes	Bacilli	Lactobacillales	Lactobacillaceae	Limosilactobacillus	Limosilactobacillus antri/frumenti/oris/panis/reuteri/reuteri_D/reuteri_E/sp014145435/sp014145545/sp014145615/sp900156885/vaginalis_A.3	bde0171101998eec0c81b2b62848a1a5
1	Bacteria	Proteobacteria	Gammaproteobacteria	Enterobacterales	Pasteurellaceae	Haemophilus	Haemophilus	c7586c56f3ca0daac700cd00ce4a74ba
1	Bacteria	Firmicutes	Negativicutes	Veillonellales-Selenomonadales	Veillonellaceae	Veillonella	Veillonella.15	6b19d075cfa368531bc85fb25f694aaf
1	Bacteria	Firmicutes	Bacilli	Staphylococcales	Staphylococcaceae	Staphylococcus	aureus.4	025e2a5c74d2ebccd76e9be48d1d817a
4	Bacteria	Actinobacteriota	Coriobacteriia	Coriobacteriales	Eggerthellaceae	CAG-1427	CAG-1427 sp.	64cd0cec44c7015ce37e278c8c8a558c
1	Bacteria	Bacteroidota	Bacteroidia	Bacteroidales	Tannerellaceae	Parabacteroides	Parabacteroides distasonis.3	89d18f15b0b395bfee47a2cd34ee44ce
1	Bacteria	Firmicutes	Clostridia	Lachnospirales	Lachnospiraceae	Sellimonas	Sellimonas.4	281fb23ee4f7c35f9fbce3dddd4865d3
4	Bacteria	Firmicutes_A	Clostridia	Lachnospirales	Lachnospiraceae	Enterocloster	Enterocloster sp.	20a4ef09ca6e01e1cc0421853f672b7e
1	Bacteria	Bacteroidota	Bacteroidia	Bacteroidales	Bacteroidaceae	Bacteroides	thetaiotaomicron.3	5d0a426fc13ebcb2d0eb73d530e36d77
1	Bacteria	Firmicutes_A	Clostridia	Lachnospirales	Lachnospiraceae	Family_Lachnospiraceae	Family_Lachnospiraceae6	75cc480d438ca6f1f7e1de1de0436078
1	Bacteria	Firmicutes	Bacilli	Lactobacillales	Streptococcaceae	Streptococcus	peroris.2	62524bcef40963997d1b59c3cbaa062d
4	Bacteria	Firmicutes_A	Clostridia	Lachnospirales	Lachnospiraceae	Ruminococcus_A	Ruminococcus_A sp.	64d81736236dac383ebfa3a46b23e122
1	Bacteria	Firmicutes	Bacilli	Lactobacillales	Lactobacillaceae	Lacticaseibacillus	Lacticaseibacillus casei/chiayiensis/paracasei/zeae.2	be98d8ff969d6a63f02a1689d8b0ba87
2	Bacteria	Actinobacteriota	Actinomycetia	Actinomycetales	Bifidobacteriaceae	Bifidobacterium	Bifidobacterium sp.12	586fff2cb8f9d8b7cdba9ae717bd39af
1	Bacteria	Bacteroidota	Bacteroidia	Bacteroidales	Bacteroidaceae	Bacteroides	Bacteroides.1	76de752a177ae96b1151ae697368d049
1	Bacteria	Firmicutes	Bacilli	Lactobacillales	Lactobacillaceae	Limosilactobacillus	Limosilactobacillus fermentum.7	0573b51a3e9ae3ee3a4e81ba6d610c53
1	Bacteria	Firmicutes_A	Clostridia	Clostridiales	Clostridiaceae	Clostridium_P	Clostridium_P perfringens.7	8613af8768716b7c48b6db290d3469e0
1	Bacteria	Firmicutes_A	Clostridia	Peptostreptococcales	Peptostreptococcaceae	Romboutsia	Romboutsia sp900545985/timonensis.2	24a6cd80952ac617cb20485554e48245
1	Bacteria	Bacteroidota	Bacteroidia	Bacteroidales	Bacteroidaceae	Bacteroides	vulgatus.11	93bbae904168c6b8f249b23a80a73d2f
1	Bacteria	Proteobacteria	Gammaproteobacteria	Enterobacterales	Enterobacteriaceae	Enterobacteriaceae	Enterobacteriaceae.4	eddabf287d8128094d0830de35a9f681
1	Bacteria	Bacteroidota	Bacteroidia	Bacteroidales	Tannerellaceae	Parabacteroides	Parabacteroides sp.32.1	529ad9f71bdb4b4532bf7b895938a111
1	Bacteria	Proteobacteria	Gammaproteobacteria	Pseudomonadales	Pseudomonadaceae	Pseudomonas	Pseudomonas.2	879815b1626853f4af4a4f0e85703fd2
1	Bacteria	Bacteroidota	Bacteroidia	Bacteroidales	Tannerellaceae	Parabacteroides	Parabacteroides distasonis_A.2	a5da7bc3f20377a1f2903af92dc0ca31
1	Bacteria	Bacteroidota	Bacteroidia	Bacteroidales	Prevotellaceae	Prevotella_7	buccae.2	5bcd3f70bef31525c29d223784007764
1	Bacteria	Firmicutes_A	Clostridia	Clostridiales	Clostridiaceae	Clostridium_P	Clostridium_P perfringens.8	a55362a84d4d550d73848cfbeebaf624
2	Bacteria	Actinobacteriota	Coriobacteriia	Coriobacteriales	Eggerthellaceae	Gordonibacter	urolithinfaciens	541b4e8f3fecf6a0d879cce4954b42f7
1	Bacteria	Firmicutes_A	Clostridia	Lachnospirales	Lachnospiraceae	Enterocloster	Enterocloster sp.5.1	0ff0873bee4f7724a95c9d13de4e677f
4	Bacteria	Firmicutes	Clostridia	Lachnospirales	Lachnospiraceae	Anaerostipes	hadrus.11	0ae2ea78213ca741ded6f9b30042d4b1
1	Bacteria	Proteobacteria	Gammaproteobacteria	Burkholderiales	Comamonadaceae	Delftia	acidovorans	7e537c12b9af4d0e06d9c229f25d2176
1	Bacteria	Proteobacteria	Gammaproteobacteria	Burkholderiales	Burkholderiaceae	Sutterella	Sutterella sp900752815/wadsworthensis_A.1	1d5d65bf5ed3436d8712b56460b49b76
1	Bacteria	Bacteroidota	Bacteroidia	Bacteroidales	Rikenellaceae	Alistipes	shahii	d08356dd9f482bb52a98464042add8e1
4	Bacteria	Firmicutes	Negativicutes	Veillonellales-Selenomonadales	Veillonellaceae	Dialister	invisus	35fd41579b5eec27ec14c400c586c480
4	Bacteria	Firmicutes_A	Clostridia	Oscillospirales	Acutalibacteraceae	HGM12789	HGM12789 sp.2	f28e46829202e2c9321343907dbf2cf7
2	Bacteria	Firmicutes	Bacilli	Lactobacillales	Lactobacillaceae	Limosilactobacillus	Limosilactobacillus.1	8d4cab39879de4ada517ba0737e70908
1	Bacteria	Firmicutes	Clostridia	Lachnospirales	Lachnospiraceae	[Eubacterium] hallii group	[Eubacterium] hallii group.2	b5e3497608adb66df7d662dd8196ed2f
4	Bacteria	Actinobacteriota	Coriobacteriia	Coriobacteriales	Eggerthellaceae	Adlercreutzia	Adlercreutzia celatus_A/equolifaciens.1	fe32c1ad8e80545cbe235d105ef25d60
1	Bacteria	Firmicutes	Bacilli	Lactobacillales	Streptococcaceae	Streptococcus	salivarius.28	644b6a0f045961ae592f4439b8c48ca5
2	Bacteria	Actinobacteriota	Coriobacteriia	Coriobacteriales	Coriobacteriaceae	Collinsella	Collinsella aerofaciens/aerofaciens_A/aerofaciens_E/aerofaciens_F/aerofaciens_G/aerofaciens_H/aerofaciens_J/aerofaciens_L/aerofaciens_N/sp000434535/sp000763055/sp002232035/sp003436275/sp003437035/sp003438495/sp003439125/sp003458415/sp003459245/sp003459505/sp003462685/sp003465825/sp003466125/sp003469185/sp003469205/sp003470665/sp003471585/sp003487125/sp004554255/sp900540895/sp900541015/sp900541025…	b6f359162d673ea4a0fb542bfd007b94
4	Bacteria	Firmicutes	Clostridia	Oscillospirales	UCG-010	UCG-010	UCG-010.6	f77e75df6a734832b4290622c6b45548
1	Bacteria	Firmicutes	Bacilli	Erysipelotrichales	Erysipelotrichaceae	Holdemanella	Holdemanella.1	7793e6c94c77f08fae41afe3b01f1f9d
1	Bacteria	Actinobacteriota	Actinomycetia	Actinomycetales	Actinomycetaceae	Actinomyces	Actinomyces bowdenii_A/bowdenii_B/sp013185035.2	95035cd25cbe6346d406a3d6228c066f
4	Bacteria	Firmicutes_A	Clostridia	Oscillospirales	Oscillospiraceae	Dysosmobacter	Dysosmobacter sp014297375	d42579185929ae54585cb6b9c822a1c9
2	Bacteria	Verrucomicrobiota	Verrucomicrobiae	Verrucomicrobiales	Akkermansiaceae	Akkermansia	muciniphila.5	16e19c10e811d37292e822701a04aa52
1	Bacteria	Actinobacteriota	Coriobacteriia	Coriobacteriales	Eggerthellaceae	Enterorhabdus	Enterorhabdus.2	f12727fb1ec1d6579711f9bc0e9a43f0
2	Bacteria	Firmicutes_A	Clostridia	Clostridiales	Clostridiaceae	Clostridium	Clostridium sartagoforme_B	0b7e3a677c972c0b9b6ce17a583c3dfc
1	Bacteria	Actinobacteriota	Actinobacteria	Corynebacteriales	Corynebacteriaceae	Corynebacterium	accolens.1	c3d4cde1fefab50869535171600db4ac
4	Bacteria	Firmicutes_A	Clostridia	Lachnospirales	Lachnospiraceae	CHKCI001	CHKCI001 sp.	c02003f5cdf9d002d7f34df83c21887f
1	Bacteria	Firmicutes_C	Negativicutes	Acidaminococcales	Acidaminococcaceae	Phascolarctobacterium_A	Phascolarctobacterium_A sp900544885/succinatutens.5	453ca8d9371aa6634d6370fcfdb37976
1	Bacteria	Actinobacteriota	Actinobacteria	Bifidobacteriales	Bifidobacteriaceae	Bifidobacterium	catenulatum.6	e893230f703ef45e98eb40ed5ed0df0d
1	Bacteria	Firmicutes	Clostridia	Peptostreptococcales-Tissierellales	Family XI	Peptoniphilus	coxii.1	b496ff86d0af680a337612617a0bc61f
1	Bacteria	Firmicutes_A	Clostridia	Lachnospirales	Cellulosilyticaceae	Niameybacter	Niameybacter sp900549765	3fc4e1ba3ec8c5224060431bff321530
1	Bacteria	Actinobacteriota	Coriobacteriia	Coriobacteriales	Eggerthellaceae	Slackia	exigua	06f5587194058690234b0af24a1b20e8
1	Bacteria	Firmicutes	Clostridia	Lachnospirales	Lachnospiraceae	Anaerostipes	hadrus.12	49b569d3d51f377d342937fcf46c2dc5
4	Bacteria	Firmicutes	Bacilli	Lactobacillales	Lactobacillaceae	Leuconostoc	Leuconostoc citreum/holzapfelii/lactis/lactis_A	4cd70a8021bd1c622bdb433fbe32c2ab
4	Bacteria	Firmicutes_A	Clostridia	Oscillospirales	Acutalibacteraceae	Ruminococcus_E	Ruminococcus_E bromii/bromii_B/sp900765785.2	a39d801345fa448b725cc560f78f64bd
1	Bacteria	Firmicutes	Clostridia	Lachnospirales	Lachnospiraceae	Lachnospira	Lachnospira.1	f7c2e7993df50b4b05496860f8393a10
4	Bacteria	Actinobacteriota	Coriobacteriia	Coriobacteriales	Eggerthellaceae	Adlercreutzia	Adlercreutzia celatus_A/equolifaciens.2	4d1e3b4391db561408e3768eb4a45e1b
2	Bacteria	Proteobacteria	Gammaproteobacteria	Enterobacterales	Enterobacteriaceae	Escherichia-Shigella	Escherichia-Shigella.14	dce0ae4fb1a679ce488199ca0eaeb40d
4	Bacteria	Firmicutes	Bacilli	Erysipelotrichales	Erysipelatoclostridiaceae	Faecalibacillus	Faecalibacillus faecis/intestinalis/sp900762515.7	c5be3cbb0c4c3ad43d1c9902233d0993
1	Bacteria	Bacteroidota	Bacteroidia	Bacteroidales	Tannerellaceae	Parabacteroides	Parabacteroides sp.28	1974787cf500afff8f842ab6b205f8a9
2	Bacteria	Firmicutes	Bacilli	Erysipelotrichales	Erysipelatoclostridiaceae	Erysipelotrichaceae UCG-003	Erysipelotrichaceae UCG-003	7616fb95777834fd37a56beda75b9a5c
1	Bacteria	Firmicutes	Clostridia	Peptostreptococcales-Tissierellales	Peptostreptococcaceae	Intestinibacter	Intestinibacter	d2c22212bbbd3041582eb16cbd444f60
4	Bacteria	Firmicutes_A	Clostridia_A	Christensenellales	CAG-74	HGM11604	HGM11604 sp.4.1	0483ff2c0b34f807f5f2e6bfebdc7a4b
4	Bacteria	Firmicutes	Clostridia	Lachnospirales	Lachnospiraceae	Anaerostipes	hadrus.13	2ee585c245a593473acb21bdf1d7a460
1	Bacteria	Firmicutes	Clostridia	Oscillospirales	Ruminococcaceae	Faecalibacterium	prausnitzii.18	2773ebe55911ff04db3cb70dc5879b3b
4	Bacteria	Bacteroidota	Bacteroidia	Bacteroidales	Prevotellaceae	Prevotella_9	Prevotella_9.11	7995a612a6216f9f54f123fad99d4148
1	Bacteria	Firmicutes	Clostridia	Lachnospirales	Lachnospiraceae	Anaerostipes	rhamnosivorans	34dfaa1694261b8d2377aa68b5436073
4	Bacteria	Firmicutes_A	Clostridia	Monoglobales_A	UBA1381	CAG-41	CAG-41 sp900066215.3	4608cf2aa614ad44e2e4c90e5145221e
1	Bacteria	Firmicutes	Clostridia	Lachnospirales	Lachnospiraceae	Lachnospiraceae	Lachnospiraceae.8	20eb9e532d72684b2bb01c583dde04da
1	Bacteria	Firmicutes_A	Clostridia	Peptostreptococcales	Peptostreptococcaceae	Paraclostridium	Paraclostridium sordellii/tenue	4c52a8029625903bb8c4aa9b40216836
1	Bacteria	Verrucomicrobiota	Verrucomicrobiae	Verrucomicrobiales	Akkermansiaceae	Akkermansia	Akkermansia.5	f931c1a73ee2e3c59d8f9832c244558a
2	Bacteria	Firmicutes	Bacilli	Lactobacillales	Aerococcaceae	Abiotrophia	Abiotrophia	6e68d3873eb052ed4a4c880b2b858e2a
1	Bacteria	Proteobacteria	Gammaproteobacteria	Enterobacterales	Pasteurellaceae	Haemophilus	Haemophilus.1	f3dc239b6d6c09c017eecdf80ee003d6
1	Bacteria	Firmicutes_C	Negativicutes	Veillonellales	Dialisteraceae	Dialister	Dialister sp900543165.1	29e1d7cb0e776b057206d57fd329c761
1	Bacteria	Desulfobacterota	Desulfovibrionia	Desulfovibrionales	Desulfovibrionaceae	Desulfovibrio	Desulfovibrio	c3188521b26db0b2781c6a51419154b4
1	Bacteria	Firmicutes_A	Clostridia	Lachnospirales	Lachnospiraceae	Dorea	Dorea formicigenerans.2	81cae1e148f5af946d09256e4e59295c
1	Bacteria	Firmicutes	Clostridia	Lachnospirales	Lachnospiraceae	[Ruminococcus] gnavus group	[Ruminococcus] gnavus group.13	fefa21ac5025c8ed8cede78c8ca90dd3
1	Bacteria	Bacteroidota	Bacteroidia	Bacteroidales	Bacteroidaceae	Bacteroides	uniformis.5	78c6ecae885d02288926aea45300a693
1	Bacteria	Firmicutes	Clostridia	Lachnospirales	Lachnospiraceae	[Ruminococcus] gnavus group	[Ruminococcus] gnavus group.14	5f3ba800ad35de455266948a9a077b73
1	Bacteria	Firmicutes	Clostridia	Lachnospirales	Lachnospiraceae	Agathobacter	Agathobacter.12	5d58f5db4dc73c0bace060a2edcc14da
1	Bacteria	Firmicutes	Clostridia	Lachnospirales	Lachnospiraceae	Blautia	obeum.6	1ba541434fe1e644a9aaf93da6f7d23a
1	Bacteria	Firmicutes	Clostridia	Lachnospirales	Lachnospiraceae	[Ruminococcus] torques group	[Ruminococcus] torques group.6	973ce33b0df923f64908dcf4d3b17b80
1	Bacteria	Firmicutes_A	Clostridia	Clostridiales	Clostridiaceae	Clostridium	Clostridium disporicum_A/sp000753455	1c412f987f12489b6a82d99851b7dab0
1	Bacteria	Firmicutes	Bacilli	Lactobacillales	Streptococcaceae	Streptococcus	gallolyticus.6	42ea471d014cf9799302a8b64c33b0dd
1	Bacteria	Actinobacteriota	Actinobacteria	Actinomycetales	Actinomycetaceae	Mobiluncus	curtisii	1bfee579aa4c05db2eab351fd3e0f23b
4	Bacteria	Firmicutes	Clostridia	Oscillospirales	Ruminococcaceae	Faecalibacterium	prausnitzii.19	bbae6ed124f4d6b48435a964a95c8418
4	Bacteria	Firmicutes_A	Clostridia	Oscillospirales	Oscillospiraceae	CAG-110	CAG-110 sp.7	3fd0c1aebeadfd9c4f8a66a6680b310f
2	Bacteria	Firmicutes	Clostridia	Lachnospirales	Lachnospiraceae	Blautia	Blautia.21	a5263af1fc029ff4e2bf4444c0c4ce9d
1	Bacteria	Proteobacteria	Gammaproteobacteria	Pseudomonadales	Pseudomonadaceae	Pseudomonas	yamanorum.1	ffe1e63147af5c2cd21231f1d5d59488
1	Bacteria	Firmicutes	Negativicutes	Veillonellales-Selenomonadales	Veillonellaceae	Veillonella	parvula.14	a32352673402c077f49f8f794378f125
2	Bacteria	Firmicutes	Clostridia	Lachnospirales	Lachnospiraceae	Agathobacter	Agathobacter.13	561a1f94e2abc40122e7cd40010a74bf
1	Bacteria	Firmicutes	Clostridia	Lachnospirales	Lachnospiraceae	Agathobacter	Agathobacter.14	65c61ce58de7dc3bac1fbb7af6fa02c5
1	Bacteria	Actinobacteriota	Actinomycetia	Actinomycetales	Actinomycetaceae	Pauljensenia	Pauljensenia pyogenes_A/sp000308055.5	e26cccace39ffc677139e4dc92f14bc3
1	Bacteria	Firmicutes	Clostridia	Peptostreptococcales-Tissierellales	Family XI	Peptoniphilus	urinimassiliensis.1	2d273cab8836240c1522a0bac1b31413
1	Bacteria	Proteobacteria	Gammaproteobacteria	Enterobacterales	Enterobacteriaceae	Klebsiella	michiganensis.3	a3109c6a896832a21867915363fe51bb
1	Bacteria	Actinobacteriota	Actinobacteria	Bifidobacteriales	Bifidobacteriaceae	Bifidobacterium	bifidum.5	30bc1be7df73c2fc8899ea7f3cf36d73
2	Bacteria	Actinobacteriota	Coriobacteriia	Coriobacteriales	Atopobiaceae	Atopobium	Atopobium	3201f9ac92b9b1c553a0f5cf87423acb
1	Bacteria	Firmicutes_A	Clostridia	Tissierellales	Peptoniphilaceae	Anaerococcus	Anaerococcus octavius	82dbf7a5dba414abce2994e8eb6d58ea
1	Bacteria	Bacteroidota	Bacteroidia	Bacteroidales	Bacteroidaceae	Bacteroides	Bacteroides sp.2	27460ebd5ca1194ad683c271dadf51b2
1	Bacteria	Firmicutes	Bacilli	Lactobacillales	Streptococcaceae	Streptococcus	mitis	b7129eeffa4113812251ec5f23a5c203
4	Bacteria	Proteobacteria	Gammaproteobacteria	Enterobacterales	Enterobacteriaceae	Enterobacter	kobei	7a5b875cf99ddb93b84ed03d5105530d
1	Bacteria	Bacteroidota	Bacteroidia	Bacteroidales	Tannerellaceae	Parabacteroides	Parabacteroides distasonis.4	e10b7d06d436aafd9c70141469476a07
1	Bacteria	Firmicutes	Clostridia	Lachnospirales	Lachnospiraceae	[Ruminococcus] gnavus group	[Ruminococcus] gnavus group.15	a0318b4092734d31394900c88f6f7e7f
2	Bacteria	Firmicutes_A	Clostridia	Lachnospirales	Lachnospiraceae	Enterocloster	Enterocloster aldenensis.2	4d68f1b3f706ef89175359f0216199f3
1	Bacteria	Firmicutes	Bacilli	Lactobacillales	Streptococcaceae	Streptococcus	parasanguinis.7	562ef7fdf79b2513bb40aa01bbf44f72
1	Bacteria	Bacteroidota	Bacteroidia	Bacteroidales	Dysgonomonadaceae	Dysgonomonas	Dysgonomonas capnocytophagoides	d8bfcc802c49be0bff6b69c614e2f281
1	Bacteria	Firmicutes	Clostridia	Lachnospirales	Lachnospiraceae	Blautia	Blautia.22	de326415d7da08cec9a721520eee87f5
2	Bacteria	Firmicutes_A	Clostridia	Lachnospirales	Lachnospiraceae	Blautia_A	Blautia_A caecimuris	8462d04767d035222ad64d5b86c8651c
1	Bacteria	Firmicutes	Clostridia	Peptostreptococcales-Tissierellales	Family XI	Anaerococcus	rubeinfantis	1d1e62c48b2402bc1836564f8242733d
1	Bacteria	Actinobacteriota	Actinobacteria	Bifidobacteriales	Bifidobacteriaceae	Bifidobacterium	breve.8	e01daa9265ac98474897896e38349f19
1	Bacteria	Firmicutes	Clostridia	Lachnospirales	Lachnospiraceae	Blautia	Blautia.23	0a89c027227dff917734a18fb7dea362
1	Bacteria	Firmicutes_A	Clostridia	Oscillospirales	Oscillospiraceae	Intestinimonas	Intestinimonas sp.2.2	849c3a2fb403dfac83e8dec4cc368d4f
4	Bacteria	Verrucomicrobiota	Verrucomicrobiae	Verrucomicrobiales	Akkermansiaceae	Akkermansia	Akkermansia.6	db466f8f1ed606e1dc11106f48b79a18
1	Bacteria	Firmicutes	Clostridia	Clostridiales	Clostridiaceae	Clostridium sensu stricto 1	Clostridium sensu stricto 1.9	55d35c4a99fe47d99df99cfce78e46cf
1	Bacteria	Firmicutes	Bacilli	Lactobacillales	Streptococcaceae	Streptococcus	salivarius.29	aa17bf9da5cdc7254a3263302fec890c
1	Bacteria	Firmicutes	Clostridia	Clostridia UCG-014	Clostridia UCG-014	Clostridia UCG-014	Clostridia UCG-014.5	6fe358c1e7e3b15ff134d8d42cedd703
1	Bacteria	Firmicutes	Negativicutes	Veillonellales-Selenomonadales	Veillonellaceae	Veillonella	ratti.12	51fb37caec5f6751f3e8109b37ed8cb0
2	Bacteria	Firmicutes_A	Clostridia	Clostridiales	Clostridiaceae	Clostridium	Clostridium sp.31	753154ca3e929a545365383bd0ba5151
1	Bacteria	Firmicutes	Bacilli	Lactobacillales	Enterococcaceae	Family_Enterococcaceae	Family_Enterococcaceae.20	897cbb5d93c23e7d0ffa92d6c7879512
2	Bacteria	Bacteroidota	Bacteroidia	Bacteroidales	Rikenellaceae	Alistipes	finegoldii.3	0ce60006eb63f10866aa8ed61af8da02
1	Bacteria	Firmicutes	Bacilli	Lactobacillales	Streptococcaceae	Streptococcus	salivarius.30	6b57f4da44b279e214f193d9a4be14c8
1	Bacteria	Firmicutes	Clostridia	Lachnospirales	Lachnospiraceae	Blautia	obeum.7	0a1482f69fe2963bdfb3789b3ff6734a
1	Bacteria	Verrucomicrobiota	Verrucomicrobiae	Verrucomicrobiales	Akkermansiaceae	Akkermansia	muciniphila.6	aa21d0050b3bcbf428352da4d435fe5c
1	Bacteria	Actinobacteriota	Coriobacteriia	Coriobacteriales	Eggerthellaceae	Senegalimassilia	Senegalimassilia.2	aff286ed82ee00ebb9510b3afbea5038
1	Archaea	Halobacterota	Halobacteria	Halobacterales	Halobacterales	Halobacterales	Halobacterales	d03daac45742fa3c2734530ca9a149bf
1	Bacteria	Firmicutes	Clostridia	Lachnospirales	Lachnospiraceae	Dorea	formicigenerans.2	3d7f811532ba73c26bca26a8337bc47c
1	Bacteria	Firmicutes	Negativicutes	Veillonellales-Selenomonadales	Veillonellaceae	Veillonella	atypica.15	e51c1d7134761aa74c082b714a481a0b
1	Bacteria	Firmicutes_A	Clostridia	Lachnospirales	Lachnospiraceae	Dorea	Dorea formicigenerans.3	06c736a7eef7cb1c2b845ccaf111af44
1	Bacteria	Proteobacteria	Gammaproteobacteria	Enterobacterales	Enterobacteriaceae	Klebsiella	pneumoniae.7	57378dc53db0a0dd8a8a0d3b4ea0ac5e
1	Bacteria	Firmicutes	Bacilli	Staphylococcales	Staphylococcaceae	Staphylococcus	caprae.7	704c333646be5dcae1ab9aaef85acfb3
4	Bacteria	Firmicutes_A	Clostridia	Lachnospirales	Lachnospiraceae	Eubacterium_G	Eubacterium_G sp000434315	557156f08d4eab8818ea1914d5f83ed0
2	Bacteria	Firmicutes	Bacilli	Lactobacillales	Enterococcaceae	Enterococcus_A	Enterococcus_A avium/florum/gilvus/hermanniensis/malodoratus/pallens/pseudoavium/raffinosus/sp005405205/viikkiensis/xiangfangensis.7	9ff1b82a83127c3b60399700e0015c23
4	Bacteria	Firmicutes	Bacilli	Haloplasmatales_A	Turicibacteraceae	Turicibacter	Turicibacter sp001543345	4f904ebdd10ebd14b54b088e8710dd22
1	Bacteria	Bacteroidota	Bacteroidia	Bacteroidales	Bacteroidaceae	Bacteroides	vulgatus.12	885a1689d41a7253eb62cb6e0ab97aea
1	Bacteria	Firmicutes	Clostridia	Lachnospirales	Lachnospiraceae	[Eubacterium] hallii group	hallii.4	c0aa094e7e8b92aca1200a45cf26cf60
1	Bacteria	Firmicutes	Bacilli	Lactobacillales	Lactobacillaceae	Limosilactobacillus	Limosilactobacillus antri/frumenti/oris/panis/reuteri/reuteri_D/reuteri_E/sp014145435/sp014145545/sp014145615/sp900156885/vaginalis_A.4	1cf171fe716a7453acf57493f41b1f7a
1	Bacteria	Bacteroidota	Bacteroidia	Bacteroidales	Prevotellaceae	Prevotella_9	Prevotella_9.12	a1b6935c2608151d83edd47c8a72c1a6
1	Bacteria	Firmicutes	Clostridia	Lachnospirales	Lachnospiraceae	Anaerostipes	hadrus.14	c30d87d6bf72072f73d9726c71fd6559
4	Bacteria	Firmicutes	Clostridia	Christensenellales	Christensenellaceae	Christensenellaceae R-7 group	Christensenellaceae R-7 group.9	5770b3a19c84177d128e3e705a64a1e7
1	Bacteria	Bacteroidota	Bacteroidia	Bacteroidales	Bacteroidaceae	Bacteroides	Bacteroides stercoris.3	b74ab6944f5a7e98a99e29bcbea455c0
4	Bacteria	Bacteroidota	Bacteroidia	Bacteroidales	Bacteroidaceae	Bacteroides	uniformis.6	98fcc7e4135d41152d2db711de5c1255
1	Bacteria	Firmicutes	Negativicutes	Veillonellales-Selenomonadales	Veillonellaceae	Anaeroglobus	Anaeroglobus	e8d4b52375949843ca41183d80332e3a
4	Bacteria	Firmicutes_A	Clostridia	Lachnospirales	Lachnospiraceae	CAG-127	CAG-127 sp900319515	19ff2a801156e1930f697799d400fa95
1	Bacteria	Firmicutes_A	Clostridia	Clostridiales	Clostridiaceae	Clostridium_P	Clostridium_P perfringens.9	875f9ef9a121a3002ea097444690a20a
2	Bacteria	Actinobacteriota	Actinobacteria	Bifidobacteriales	Bifidobacteriaceae	Bifidobacterium	breve.9	3d49d6d68e6ee5fce8dd0a8d4fc77987
1	Bacteria	Proteobacteria	Gammaproteobacteria	Enterobacterales	Enterobacteriaceae	Klebsiella	quasipneumoniae.7	65ab1f9a0f4eda2de02ad69a3fe28aec
2	Bacteria	Firmicutes	Negativicutes	Veillonellales-Selenomonadales	Veillonellaceae	Veillonella	dispar.3	24522f7485582e07564aed7c426af59d
1	Bacteria	Firmicutes	Bacilli	Erysipelotrichales	Erysipelotrichaceae	Faecalitalea	cylindroides.2	032964fc54b093f848074de5b348c488
1	Bacteria	Firmicutes	Negativicutes	Veillonellales-Selenomonadales	Veillonellaceae	Veillonella	parvula.15	a7bbc616e2f64c23c14ef4938365c0be
4	Bacteria	Bacteroidota	Bacteroidia	Bacteroidales	Bacteroidaceae	Bacteroides	xylanisolvens.2	ce0837f50ab0a7abc73bddc82e8b55e6
4	Bacteria	Firmicutes_A	Clostridia	Oscillospirales	Butyricicoccaceae	Agathobaculum	Agathobaculum sp..3	d25cde7f2c9d8b0e3706df6f046982fc
1	Bacteria	Firmicutes	Bacilli	Staphylococcales	Staphylococcaceae	Staphylococcus	Staphylococcus.19	4576b5b0e7cd1cdf791e73d9d5c6643e
1	Bacteria	Firmicutes	Bacilli	Staphylococcales	Staphylococcaceae	Staphylococcus	caprae.8	dfdf4f00f2e2d801df98b1d425c0fb3b
2	Bacteria	Bacteroidota	Bacteroidia	Bacteroidales	Bacteroidaceae	Bacteroides	fragilis.11	7986bc993209a43a8fde48679daca4ff
4	Bacteria	Firmicutes_A	Clostridia	Oscillospirales	Acutalibacteraceae	UBA1417	UBA1417 sp..1	70939799b24f29726843c393740f4016
2	Bacteria	Actinobacteriota	Actinobacteria	Bifidobacteriales	Bifidobacteriaceae	Bifidobacterium	longum.17	52e0de856a574c44753bf862cfd2a91f
2	Bacteria	Firmicutes_A	Clostridia	Lachnospirales	Lachnospiraceae	Faecalimonas	Faecalimonas sp.	da6963d915528c2bc066bef30dd22fdf
4	Bacteria	Bacteroidota	Bacteroidia	Bacteroidales	Tannerellaceae	Parabacteroides	Parabacteroides distasonis.5	4cc835d67b5ea24fc22433a160b251c7
1	Bacteria	Firmicutes	Bacilli	Erysipelotrichales	Erysipelatoclostridiaceae	Erysipelatoclostridium	Erysipelatoclostridium sp.2.1	5d3b383e672b386965f00d2777f39f79
1	Bacteria	Proteobacteria	Gammaproteobacteria	Enterobacterales	Enterobacteriaceae	Escherichia-Shigella	Escherichia-Shigella.15	33a9338215d43227c79244ad90b53b46
1	Bacteria	Firmicutes	Bacilli	Lactobacillales	Lactobacillaceae	Limosilactobacillus	Limosilactobacillus mucosae.4	0bb47f6e088c63eec1cf288aebc80ab3
1	Bacteria	Firmicutes	Clostridia	Oscillospirales	Ruminococcaceae	Subdoligranulum	Subdoligranulum.7	c8341bdce729e1559735cfbeec891b51
1	Bacteria	Firmicutes	Clostridia	Peptostreptococcales-Tissierellales	Family XI	Peptoniphilus	urinimassiliensis.2	3521776111781910ba3c45a8b865276f
1	Bacteria	Firmicutes	Bacilli	Lactobacillales	Lactobacillaceae	Ligilactobacillus	Ligilactobacillus ruminis.1	1833bcea764839d18a8018435e7a1a57
1	Bacteria	Bacteroidota	Bacteroidia	Bacteroidales	Prevotellaceae	Prevotella_7	buccae.3	a9fb70b4ffb8c1369dea4094c3484b96
4	Bacteria	Firmicutes	Clostridia	Lachnospirales	Lachnospiraceae	[Eubacterium] hallii group	[Eubacterium] hallii group.3	50ecd277f0e8a668926f981e3c241565
1	Bacteria	Firmicutes	Clostridia	Peptostreptococcales-Tissierellales	Family XI	Peptoniphilus	urinimassiliensis.3	e081bb71d1fa820dd8673231530eea36
2	Bacteria	Firmicutes	Clostridia	Peptostreptococcales-Tissierellales	Peptostreptococcaceae	Peptostreptococcus	anaerobius	1d2b00ff8b7477d2b6c2b8043f7c9d31
1	Bacteria	Firmicutes	Bacilli	Lactobacillales	Enterococcaceae	Enterococcus	faecalis.1	7f671e3595d056ce86e453b98c5aa068
1	Bacteria	Actinobacteriota	Actinobacteria	Bifidobacteriales	Bifidobacteriaceae	Bifidobacterium	scardovii	eb719ac68e1582865d49cd0cbb22568b
1	Bacteria	Firmicutes	Bacilli	Staphylococcales	Staphylococcaceae	Staphylococcus	epidermidis.3	a8a85a39b353253ce68e687bf6c36e3e
1	Bacteria	Firmicutes	Negativicutes	Veillonellales-Selenomonadales	Veillonellaceae	Veillonella	Veillonella.16	bea826752fe6edf6ae5dc89938869bf2
1	Bacteria	Firmicutes	Negativicutes	Veillonellales-Selenomonadales	Veillonellaceae	Megasphaera	micronuciformis.7	f69377d24eff95c138a520aa7a6eb90e
1	Bacteria	Firmicutes_A	Clostridia	Oscillospirales	Ruminococcaceae	Gemmiger	Gemmiger sp.3	e89b6f3ff4ccdf3938a1dccaec64b6fb
1	Bacteria	Proteobacteria	Gammaproteobacteria	Enterobacterales	Enterobacteriaceae	Escherichia-Shigella	Escherichia-Shigella.16	e8f7bdf405960abfd2a41f182d19e505
1	Bacteria	Actinobacteriota	Coriobacteriia	Coriobacteriales	Atopobiaceae	Olsenella	Olsenella.1	1266cdbf8dd8fb4c7ebb967a8e59a473
4	Bacteria	Firmicutes_A	Clostridia_A	Christensenellales	CAG-74	Firm-11	Firm-11 sp.	45a44824c4535a0dd0a7f4e18a5aa25d
1	Bacteria	Bacteroidota	Bacteroidia	Bacteroidales	Porphyromonadaceae	Porphyromonas	uenonis	d7a3f1a4753d04af73bda6d9b02f5a18
1	Bacteria	Actinobacteriota	Coriobacteriia	Coriobacteriales	Coriobacteriaceae	Collinsella	Collinsella aerofaciens/aerofaciens_A/aerofaciens_E/aerofaciens_F/aerofaciens_G/aerofaciens_H/aerofaciens_J/aerofaciens_L/aerofaciens_N/sp000434535/sp000763055/sp002232035/sp003436275/sp003437035/sp003438495/sp003439125/sp003458415/sp003459245/sp003459505/sp003462685/sp003465825/sp003466125/sp003469185/sp003469205/sp003470665/sp003471585/sp003487125/sp004554255/sp900540895/sp900541015/sp900541025…	34ba6bd29c6702d1a19dbd89669a7218
[truncated: 719 more rows]
